# Supplementary material for: Human iPSC-RPE with the PSEN1H163R pathogenic variant recapitulates Alzheimer’s disease features and reveals melanosome defects
Source: Research Square preprint supplement (doi:10.21203/rs.3.rs-6556064/v1), 2025-05-12
Supplement: Supplementary file 1 [file bf3c6b920376bb5ae9156fef.xlsx]

## Sheet: Parameters
Parameter	Cutoff
P value	0.05
Fold change	1.2
Clean	TRUE
FileName	3-DANA-2022-09-19_MM_2setsCombined.xlsx
DesignFile	3-Design.xlsx
Date	Tue Sep 27 09:25:28 2022

## Sheet: FULL RESULTS 
Accession	Uniprot	SetA_126	SetA_127n	SetA_127c	SetA_128n	SetA_128c	SetB_126	SetB_127n	SetB_127c	SetB_128n	SetB_128c	SetA_129n	SetA_129c	SetA_130n	SetA_130c	SetA_131	SetB_129n	SetB_129c	SetB_130n	SetB_130c	SetB_131	Means.CRISPR	Means.NATIVE	MaxFC	Anova	Anova.adj	Clusters	Protein.Id	Gene.Symbol	Description	SetA.Peptides	SetB.Peptides	SetA_126.1	SetA_127n.1	SetA_127c.1	SetA_128n.1	SetA_128c.1	SetA_129n.1	SetA_129c.1	SetA_130n.1	SetA_130c.1	SetA_131.1	SetB_126.1	SetB_127n.1	SetB_127c.1	SetB_128n.1	SetB_128c.1	SetB_129n.1	SetB_129c.1
sp|A0A0U1RRI6|CENL3_HUMAN	A0A0U1RRI6	12.8513	13.6657	12.8479	11.0345	10.7095	20.7979	10.9966	10.9836	10.8731	8.86498	8.1337	10.5415	9.62882	8.77664	6.00114	5.44046	9.80718	8.30166	9.16533	11.2718	12.0503	8.50905	1.41618	0.00337492	0.0185092	1	sp|A0A0U1RRI6|CENL3_HUMAN	CENPVL3	Centromere protein V-like protein 3 OS=Homo sapiens OX=9606 GN=CENPVL3 PE=3 SV=1	1	2	11.8089	13.0268	12.4849	10.4596	10.3645	7.937	10.5415	9.40054	8.23015	5.74625	19.2997	9.9609	10.2572	9.90357	7.87566	5.42123	9.5645
sp|A0A1B0GTH6|CS2IP_HUMAN	A0A1B0GTH6	6.41858	9.36314	6.72116	5.86106	11.1253	42.4274	20.8014	6.22146	10.6138	7.68222	12.8972	15.2771	24.7631	6.89619	3.98704	4.58586	5.08875	3.12875	4.0898	3.0979	10.1662	6.44729	1.57682	0.160663	0.281743		sp|A0A1B0GTH6|CS2IP_HUMAN	CSNKA2IP	Casein kinase II subunit alpha'-interacting protein OS=Homo sapiens OX=9606 GN=CSNKA2IP PE=3 SV=1	2	2	5.89796	8.9254	6.53124	5.55569	10.7669	12.5853	15.2771	24.176	6.46679	3.8177	39.371	18.8423	5.81001	9.66745	6.82489	4.56965	4.96283
sp|A0AV02|S12A8_HUMAN	A0AV02						6.98031	5.37774	7.27097	8.79705	3.85333						8.03443	5.3137	16.5678	20.3505	22.4458	6.21223	12.6434	2.03525	0.0537694	0.126728		sp|A0AV02|S12A8_HUMAN	SLC12A8	Solute carrier family 12 member 8 OS=Homo sapiens OX=9606 GN=SLC12A8 PE=2 SV=4	0	1	0	0	0	0	0	0	0	0	0	0	6.47746	4.87125	6.79011	8.01267	3.4233	8.00602	5.18221
sp|A0AV96|RBM47_HUMAN	A0AV96	9.58079	10.2726	10.2532	9.2855	8.26468	10.4005	10.6301	10.813	11.1828	9.48667	10.0404	15.0929	11.6782	11.3611	8.0362	8.83952	9.75802	11.8202	11.4238	11.6373	9.98199	10.8155	1.0835	0.213949	0.344429		sp|A0AV96|RBM47_HUMAN	RBM47	RNA-binding protein 47 OS=Homo sapiens OX=9606 GN=RBM47 PE=1 SV=2	11	11	8.80368	9.79235	9.96344	8.80171	7.99841	9.7976	15.0929	11.4013	10.6537	7.69488	9.65126	9.62893	10.0979	10.1857	8.42797	8.80827	9.51656
sp|A0AVF1|IFT56_HUMAN	A0AVF1	8.99464	10.1458	9.8157	10.4892	10.7866	9.43477	10.8579	9.37978	10.1835	9.14233	11.2541	11.3809	10.4544	9.69805	10.9448	11.7763	11.8353	10.5808	11.2338	11.3152	9.90249	11.0295	1.11381	0.00145481	0.0105288		sp|A0AVF1|IFT56_HUMAN	TTC26	Intraflagellar transport protein 56 OS=Homo sapiens OX=9606 GN=TTC26 PE=2 SV=1	5	3	8.26507	9.6715	9.53834	9.94266	10.4391	10.9819	11.3809	10.2065	9.09419	10.4799	8.75511	9.8353	8.75946	9.27554	8.12205	11.7347	11.5424
sp|A0AVT1|UBA6_HUMAN	A0AVT1	9.6887	9.53813	9.16927	9.82913	10.8189	10.1229	12.34	11.4916	11.3086	12.9381	11.4117	9.67599	10.3054	11.9936	11.6842	8.20551	10.9528	9.44142	10.1647	9.44689	10.6587	10.2653	1.03832	0.481123	0.610535		sp|A0AVT1|UBA6_HUMAN	UBA6	Ubiquitin-like modifier-activating enzyme 6 OS=Homo sapiens OX=9606 GN=UBA6 PE=1 SV=1	25	29	8.90283	9.09221	8.91018	9.31702	10.4703	11.1357	9.67599	10.0611	11.2468	11.1879	9.39363	11.1778	10.7316	10.3003	11.4942	8.1765	10.6818
sp|A0JNW5|UH1BL_HUMAN	A0JNW5						4.54062	4.59528	11.222	10.8033	8.30619						6.36149	7.62113	20.4322	8.85818	22.5583	7.31966	11.4633	1.5661	0.210273	0.34053		sp|A0JNW5|UH1BL_HUMAN	UHRF1BP1L	UHRF1-binding protein 1-like OS=Homo sapiens OX=9606 GN=UHRF1BP1L PE=1 SV=2	0	1	0	0	0	0	0	0	0	0	0	0	4.21352	4.16249	10.4798	9.84006	7.37923	6.339	7.43255
sp|A0MZ66|SHOT1_HUMAN	A0MZ66	9.75913	10.0448	9.21177	9.43085	7.42064	7.43124	8.72712	13.4016	12.7202	8.40046	9.46911	14.2339	11.3447	13.1657	9.90993	9.17368	7.14273	13.4111	12.9553	12.4898	9.48107	11.0989	1.17064	0.10842	0.210771		sp|A0MZ66|SHOT1_HUMAN	SHTN1	Shootin-1 OS=Homo sapiens OX=9606 GN=SHTN1 PE=1 SV=4	16	15	8.96755	9.57519	8.95148	8.93949	7.18157	9.24012	14.2339	11.0757	12.3459	9.48903	6.89591	7.90518	12.5153	11.586	7.46298	9.14125	6.96598
sp|A0PJW6|TM223_HUMAN	A0PJW6	9.70881	11.938	10.586	10.8517	12.0702	15.2868	11.8895	10.3821	10.4837	9.5645	9.50382	11.5181	11.0437	9.75179	7.02405	7.83752	9.25762	8.63072	10.5891	12.3816	11.1763	9.6215	1.1616	0.0482286	0.117219		sp|A0PJW6|TM223_HUMAN	TMEM223	Transmembrane protein 223 OS=Homo sapiens OX=9606 GN=TMEM223 PE=1 SV=1	2	1	8.92131	11.3799	10.2869	10.2863	11.6813	9.27399	11.5181	10.7819	9.14459	6.72572	14.1856	10.7697	9.69551	9.5489	8.49711	7.80981	9.02854
sp|A0PJZ3|GXLT2_HUMAN	A0PJZ3	9.19183	8.95731	8.07561	10.713	9.25096	8.78747	15.9669	10.9226	10.8782	11.291	14.7205	8.30723	12.7963	12.7548	9.33111	5.68445	10.5575	11.4866	10.5298	10.3654	10.2177	10.3431	1.01227	0.901287	0.934395		sp|A0PJZ3|GXLT2_HUMAN	GXYLT2	Glucoside xylosyltransferase 2 OS=Homo sapiens OX=9606 GN=GXYLT2 PE=2 SV=2	2	3	8.44627	8.53854	7.84742	10.1548	8.95292	14.3645	8.30723	12.4929	11.9606	8.93479	8.15444	14.4631	10.2002	9.90825	10.0309	5.66435	10.2963
sp|A0PK00|T120B_HUMAN	A0PK00	10.3606	9.19418	10.3603	10.132	10.5186	10.885	9.78916	8.69388	8.52735	6.97757	8.01899	10.2745	9.26343	12.6083	13.4696	15.1546	14.4269	10.2998	10.4489	10.0908	9.46941	11.1898	1.18167	0.0456011	0.112596		sp|A0PK00|T120B_HUMAN	TMEM120B	Transmembrane protein 120B OS=Homo sapiens OX=9606 GN=TMEM120B PE=1 SV=1	2	2	9.52019	8.76434	10.0676	9.60408	10.1797	7.82507	10.2745	9.04381	11.8232	12.8975	10.1009	8.8672	8.11892	7.76701	6.19888	15.101	14.0699
sp|A1A4S6|RHG10_HUMAN	A1A4S6	8.91432	9.50711	10.3586	9.45812	9.61416						12.969	9.97874	11.1773	11.2268	10.7947						9.55941	11.1881	1.17038	0.012328	0.0447728		sp|A1A4S6|RHG10_HUMAN	ARHGAP10	Rho GTPase-activating protein 10 OS=Homo sapiens OX=9606 GN=ARHGAP10 PE=1 SV=1	3	0	8.19127	9.06264	10.0659	8.96534	9.30442	12.6554	9.97874	10.9123	10.5278	10.3362	0	0	0	0	0	0	0
sp|A1IGU5|ARH37_HUMAN	A1IGU5	11.0773	10.3274	7.97078	10.7285	9.57709	7.1855	9.05623	13.7769	13.1387	8.40323	9.04252	9.9636	9.28408	13.2362	13.0853	6.6591	7.19668	10.0604	15.0136	15.593	9.92488	10.504	1.05835	0.620094	0.729325		sp|A1IGU5|ARH37_HUMAN	ARHGEF37	Rho guanine nucleotide exchange factor 37 OS=Homo sapiens OX=9606 GN=ARHGEF37 PE=2 SV=2	2	4	10.1788	9.84462	7.74555	10.1695	9.26854	8.82384	9.9636	9.06397	12.412	12.5295	6.66787	8.2033	12.8658	11.9672	7.46544	6.63556	7.0186
sp|A1KZ92|PXDNL_HUMAN	A1KZ92	8.67228	10.7355	9.33432	10.6108	17.1495	6.4914	8.38969	9.07232	10.1863	11.499	10.2008	8.89975	8.57054	9.35132	10.5289	10.4675	12.9213	11.1969	13.2936	12.1798	9.91179	10.6508	1.07456	0.454546	0.586598		sp|A1KZ92|PXDNL_HUMAN	PXDNL	Peroxidasin-like protein OS=Homo sapiens OX=9606 GN=PXDNL PE=1 SV=3	5	1	7.96886	10.2336	9.07057	10.058	16.597	9.95407	8.89975	8.36735	8.76905	10.0817	6.02377	7.59953	8.47233	9.27807	10.2157	10.4305	12.6016
sp|A1L020|MEX3A_HUMAN	A1L020	5.28936	7.47213	9.25378	6.68528	6.03271	9.6084	12.1193	10.4564	9.82523	10.6639	18.7518	18.3878	17.6169	8.1565	5.55104	12.2469	9.3492	11.6772	10.1122	9.8709	8.46169	11.3886	1.34591	0.0636588	0.143807		sp|A1L020|MEX3A_HUMAN	MEX3A	RNA-binding protein MEX3A OS=Homo sapiens OX=9606 GN=MEX3A PE=1 SV=1	1	2	4.86033	7.1228	8.9923	6.33697	5.83835	18.2983	18.3878	17.1992	7.64863	5.31527	8.91623	10.9779	9.76489	8.94917	9.47381	12.2036	9.11786
sp|A1L0T0|ILVBL_HUMAN	A1L0T0	11.8167	11.7433	12.2718	11.433	9.73538	12.1517	8.4561	11.8345	11.7738	9.64882	8.42474	10.9526	9.32264	9.35802	9.09943	7.12796	7.8174	12.5276	11.4282	13.3148	11.0104	9.75218	1.12902	0.128506	0.238456		sp|A1L0T0|ILVBL_HUMAN	ILVBL	Acetolactate synthase-like protein OS=Homo sapiens OX=9606 GN=ILVBL PE=1 SV=2	55	45	10.8582	11.1943	11.925	10.8373	9.42173	8.221	10.9526	9.10162	8.77533	8.71295	11.2763	7.65969	11.0518	10.724	8.57202	7.10276	7.62396
sp|A1L170|CA226_HUMAN	A1L170	11.2046	10.4348	9.85811	7.96856	9.75939						10.6206	10.6338	12.2431	10.8429	10.5073						9.78352	10.9515	1.11938	0.113571	0.218427		sp|A1L170|CA226_HUMAN	C1orf226	Uncharacterized protein C1orf226 OS=Homo sapiens OX=9606 GN=C1orf226 PE=1 SV=1	1	0	10.2958	9.94692	9.57956	7.55339	9.44497	10.3638	10.6338	11.9528	10.1678	10.061	0	0	0	0	0	0	0
sp|A1L390|PKHG3_HUMAN	A1L390	9.98367	9.95981	10.2692	10.1424	9.38702	15.1792	12.5289	19.6198	18.2642	10.1424	10.8754	12.0692	10.8809	10.9723	9.4627	3.60618	2.05261	4.61262	10.0537	11.3337	12.0986	7.51813	1.60925	0.0370199	0.0972828	2	sp|A1L390|PKHG3_HUMAN	PLEKHG3	Pleckstrin homology domain-containing family G member 3 OS=Homo sapiens OX=9606 GN=PLEKHG3 PE=1 SV=1	2	1	9.17388	9.49417	9.97906	9.61395	9.0846	10.6124	12.0692	10.6229	10.2891	9.06079	14.0857	11.3489	18.3223	16.6357	9.01051	3.59343	2.00182
sp|A1L4H1|SRCRL_HUMAN	A1L4H1	7.54403	11.6667	8.03042	11.4045	9.59984						17.2611	6.54969	10.7589	11.2676	10.0039						9.50006	10.6515	1.12121	0.533587	0.657367		sp|A1L4H1|SRCRL_HUMAN	SSC5D	Soluble scavenger receptor cysteine-rich domain-containing protein SSC5D OS=Homo sapiens OX=9606 GN=SSC5D PE=1 SV=3	1	0	6.93212	11.1213	7.80351	10.8103	9.29056	16.8437	6.54969	10.5038	10.566	9.57903	0	0	0	0	0	0	0
sp|A1X283|SPD2B_HUMAN	A1X283	8.5772	9.09276	9.32658	10.7672	10.2153	8.91656	13.1829	9.63104	8.90701	13.6926	12.2572	8.51283	10.4181	11.9685	12.9786	12.7747	12.6769	9.44506	8.92558	7.94092	10.1	10.6233	1.05181	0.530183	0.653809		sp|A1X283|SPD2B_HUMAN	SH3PXD2B	SH3 and PX domain-containing protein 2B OS=Homo sapiens OX=9606 GN=SH3PXD2B PE=1 SV=3	8	8	7.88149	8.66766	9.06304	10.2062	9.88623	11.9608	8.51283	10.1711	11.2233	12.4274	8.27423	11.9413	8.9941	8.11282	12.1645	12.7295	12.3632
sp|A2AJT9|BCLA3_HUMAN	A2AJT9	12.7339	11.5586	11.7639	10.824	10.6503						7.31828	11.7305	10.1701	8.14026	9.24029						11.4824	9.19338	1.24899	0.0362031	0.0958883		sp|A2AJT9|BCLA3_HUMAN	BCLAF3	BCLAF1 and THRAP3 family member 3 OS=Homo sapiens OX=9606 GN=BCLAF3 PE=1 SV=1	1	0	11.701	11.0182	11.4315	10.2601	10.3072	7.1413	11.7305	9.92899	7.6334	8.84783	0	0	0	0	0	0	0
sp|A2RRP1|NBAS_HUMAN	A2RRP1	11.4636	11.844	11.2516	11.5204	11.1126	11.0332	10.1543	11.0734	11.8292	10.7506	8.77681	10.0568	8.76737	9.85586	9.54994	8.39231	9.69798	10.9448	10.7722	11.5081	11.1927	9.78462	1.14391	0.00148224	0.0106847		sp|A2RRP1|NBAS_HUMAN	NBAS	Neuroblastoma-amplified sequence OS=Homo sapiens OX=9606 GN=NBAS PE=1 SV=2	29	31	10.5338	11.2903	10.9337	10.9202	10.7546	8.56456	10.0568	8.55951	9.24218	9.14433	10.2384	9.19799	10.3411	10.7745	9.55087	8.36264	9.45801
sp|A2RTX5|SYTC2_HUMAN	A2RTX5	9.59599	9.7318	9.15412	10.067	9.40183	9.11566	12.6741	10.6836	10.7945	11.2634	11.8661	10.0487	11.6335	11.1472	11.4149	9.16059	12.456	9.56387	10.265	10.1867	10.196	10.7253	1.05191	0.286769	0.423883		sp|A2RTX5|SYTC2_HUMAN	TARSL2	Threonine--tRNA ligase 2, cytoplasmic OS=Homo sapiens OX=9606 GN=TARSL2 PE=1 SV=1	4	6	8.81764	9.27682	8.89546	9.54248	9.09893	11.5791	10.0487	11.3577	10.4531	10.9301	8.45899	11.4804	9.97706	9.83203	10.0064	9.1282	12.1478
sp|A2RU67|F234B_HUMAN	A2RU67	9.65523	9.02877	10.1272	10.9246	10.7756	6.08853	6.45832	8.77884	6.04735	7.00345	10.8818	10.7062	12.1571	9.25011	10.4735	25.9357	17.4445	9.93043	8.84642	7.82975	8.28261	11.5623	1.39597	0.0244484	0.0724028	3	sp|A2RU67|F234B_HUMAN	FAM234B	Protein FAM234B OS=Homo sapiens OX=9606 GN=FAM234B PE=1 SV=1	2	1	8.87208	8.60666	9.84101	10.3554	10.4284	10.6186	10.7062	11.8689	8.67414	10.0287	5.64993	5.85006	8.19826	5.50814	6.22187	25.844	17.0128
sp|A2RUC4|TYW5_HUMAN	A2RUC4	6.12779	5.81734	6.69977	6.33634	6.30431	13.4162	11.7861	10.9031	10.986	10.7242	21.5145	16.6937	20.3098	7.23469	6.16755	5.24653	10.0442	8.85246	12.0116	12.4775	8.48656	10.857	1.27932	0.198527	0.327636		sp|A2RUC4|TYW5_HUMAN	TYW5	tRNA wybutosine-synthesizing protein 5 OS=Homo sapiens OX=9606 GN=TYW5 PE=1 SV=1	1	1	5.63076	5.54537	6.51046	6.00621	6.1012	20.9942	16.6937	19.8283	6.78422	5.9056	12.4497	10.6761	10.182	10.0064	9.52735	5.22798	9.79569
sp|A2RUS2|DEND3_HUMAN	A2RUS2	8.91653	10.5271	12.7979	9.71728	14.3215						10.2473	8.78753	6.71808	10.1501	11.9061						11.0824	9.39275	1.17989	0.240228	0.375989		sp|A2RUS2|DEND3_HUMAN	DENND3	DENN domain-containing protein 3 OS=Homo sapiens OX=9606 GN=DENND3 PE=1 SV=2	1	0	8.1933	10.0349	12.4363	9.211	13.8601	9.99953	8.78753	6.55881	9.51814	11.4004	0	0	0	0	0	0	0
sp|A2VDF0|FUCM_HUMAN	A2VDF0	11.7648	12.0275	12.5933	12.2283	12.0157						9.66828	8.99567	9.2214	8.31086	7.35305						12.1228	8.67079	1.39812	0.000129553	0.00227034		sp|A2VDF0|FUCM_HUMAN	FUOM	Fucose mutarotase OS=Homo sapiens OX=9606 GN=FUOM PE=1 SV=2	2	0	10.8105	11.4652	12.2375	11.5912	11.6286	9.43447	8.99567	9.00278	7.79338	7.04074	0	0	0	0	0	0	0
sp|A2VDJ0|T131L_HUMAN	A2VDJ0						9.3305	11.6515	9.6862	12.6097	12.4896						15.81	11.7304	6.60505	7.99259	8.17931	11.0647	9.56543	1.15674	0.419134	0.553292		sp|A2VDJ0|T131L_HUMAN	TMEM131L	Transmembrane protein 131-like OS=Homo sapiens OX=9606 GN=TMEM131L PE=1 SV=2	0	2	0	0	0	0	0	0	0	0	0	0	8.65835	10.5541	9.04561	11.4854	11.0958	15.7541	11.4401
sp|A3KMH1|VWA8_HUMAN	A3KMH1	12.0549	12.02	11.8032	10.7605	10.2319	13.2914	10.6127	10.9489	10.9617	9.21416	8.24786	11.4018	9.45906	9.17469	8.9864	9.35982	9.76081	10.5838	10.796	10.5344	11.1377	9.78725	1.13798	0.0101245	0.0391245		sp|A3KMH1|VWA8_HUMAN	VWA8	von Willebrand factor A domain-containing protein 8 OS=Homo sapiens OX=9606 GN=VWA8 PE=1 SV=2	27	24	11.0771	11.458	11.4697	10.1999	9.90221	8.0484	11.4018	9.2348	8.60342	8.60472	12.3339	9.61318	10.2248	9.98434	8.18587	9.32673	9.51928
sp|A3KN83|SBNO1_HUMAN	A3KN83	7.20297	14.3717	11.806	15.2862	14.7144	15.1196	10.4505	13.4233	10.3106	9.41632	9.3013	8.59439	7.38967	8.12836	7.28071	9.46532	9.42794	9.37655	9.93681	9.26104	11.8929	8.77014	1.35606	0.00230633	0.0144004	1	sp|A3KN83|SBNO1_HUMAN	SBNO1	Protein strawberry notch homolog 1 OS=Homo sapiens OX=9606 GN=SBNO1 PE=1 SV=1	2	2	6.61873	13.6998	11.4724	14.4898	14.2403	9.07637	8.59439	7.21447	7.62224	6.97148	14.0304	9.46625	12.5356	9.39127	8.36547	9.43186	9.19465
sp|A4D126|ISPD_HUMAN	A4D126	9.41459	10.9082	10.2687	10.6873	10.1968						10.285	10.911	8.23787	11.7903	11.4121						10.2821	10.4461	1.01596	0.818975	0.878711		sp|A4D126|ISPD_HUMAN	CRPPA	D-ribitol-5-phosphate cytidylyltransferase OS=Homo sapiens OX=9606 GN=CRPPA PE=1 SV=2	1	0	8.65096	10.3982	9.9785	10.1305	9.86831	10.0363	10.911	8.04256	11.0562	10.9274	0	0	0	0	0	0	0
sp|A4D161|F221A_HUMAN	A4D161						7.45697	9.85931	8.92194	8.013	10.9569						17.255	12.0815	11.341	9.95545	9.54942	8.95509	11.7583	1.31303	0.0628446	0.1422		sp|A4D161|F221A_HUMAN	FAM221A	Protein FAM221A OS=Homo sapiens OX=9606 GN=FAM221A PE=1 SV=1	0	1	0	0	0	0	0	0	0	0	0	0	6.91979	8.93074	8.3319	7.29853	9.7341	17.194	11.7825
sp|A4D1E1|Z804B_HUMAN	A4D1E1	5.33389	6.79968	5.73069	8.87309	8.0081						23.3646	11.5295	12.0385	8.31589	13.584						6.82132	12.9651	1.90067	0.0110314	0.041451		sp|A4D1E1|Z804B_HUMAN	ZNF804B	Zinc finger protein 804B OS=Homo sapiens OX=9606 GN=ZNF804B PE=2 SV=2	1	0	4.90125	6.48178	5.56876	8.41079	7.7501	22.7996	11.5295	11.7531	7.79809	13.007	0	0	0	0	0	0	0
sp|A4D1E9|GTPBA_HUMAN	A4D1E9	9.69916	11.5973	10.7929	10.5523	10.866	12.4563	9.40572	11.0004	10.6221	10.4902	9.93402	11.3383	11.0851	8.76626	9.34846	6.59334	9.708	12.8119	11.6952	11.3228	10.7172	10.106	1.06049	0.381226	0.520627		sp|A4D1E9|GTPBA_HUMAN	GTPBP10	GTP-binding protein 10 OS=Homo sapiens OX=9606 GN=GTPBP10 PE=1 SV=1	2	2	8.91245	11.0551	10.4879	10.0025	10.5159	9.69379	11.3383	10.8223	8.22042	8.9514	11.559	8.51987	10.2729	9.67496	9.31952	6.57003	9.46778
sp|A4D1P6|WDR91_HUMAN	A4D1P6	9.91319	10.5425	9.78332	10.1214	8.91641	9.29525	10.5916	13.1853	13.4266	9.78883	10.7179	13.498	10.9559	9.9652	9.51786	5.63071	8.43962	10.4749	13.0248	12.4798	10.4643	10.1978	1.02613	0.788749	0.856308		sp|A4D1P6|WDR91_HUMAN	WDR91	WD repeat-containing protein 91 OS=Homo sapiens OX=9606 GN=WDR91 PE=1 SV=2	8	7	9.10912	10.0496	9.50688	9.59409	8.62915	10.4587	13.498	10.6962	9.34471	9.11361	8.62564	9.5941	12.3133	12.2294	8.69641	5.6108	8.23078
sp|A4D2B0|MBLC1_HUMAN	A4D2B0	11.7883	12.4744	10.1081	13.0471	12.2019						8.14518	8.53436	7.60135	10.0196	10.4213						11.88	8.87865	1.33804	0.00448502	0.0225735		sp|A4D2B0|MBLC1_HUMAN	MBLAC1	Metallo-beta-lactamase domain-containing protein 1 OS=Homo sapiens OX=9606 GN=MBLAC1 PE=1 SV=1	2	0	10.8321	11.8912	9.82253	12.3673	11.8088	7.94821	8.53436	7.42113	9.39575	9.97867	0	0	0	0	0	0	0
sp|A4UGR9|XIRP2_HUMAN	A4UGR9	28.96	12.5381	13.163	8.66526	13.342						4.5376	3.91899	4.17306	6.39904	9.50197						14.076	5.38117	2.61578	0.00599517	0.02775		sp|A4UGR9|XIRP2_HUMAN	XIRP2	Xin actin-binding repeat-containing protein 2 OS=Homo sapiens OX=9606 GN=XIRP2 PE=1 SV=2	2	0	26.611	11.9519	12.7911	8.21379	12.9122	4.42787	3.91899	4.07412	6.0006	9.09839	0	0	0	0	0	0	0
sp|A5A3E0|POTEF_HUMAN	A5A3E0	11.6279	9.52455	7.61936	8.9679	10.767	11.3875	13.3806	8.68127	9.49212	14.0204	12.0813	7.24186	10.2086	14.6055	11.7152	12.1522	10.9102	7.82483	9.26797	9.19203	10.3673	10.3052	1.00603	0.950235	0.966809		sp|A5A3E0|POTEF_HUMAN	POTEF	POTE ankyrin domain family member F OS=Homo sapiens OX=9606 GN=POTEF PE=1 SV=2	54	52	10.6847	9.07926	7.40406	8.50066	10.4201	11.7891	7.24186	9.96658	13.6961	11.2176	10.5672	12.1204	8.10714	8.64576	12.4557	12.1092	10.6402
sp|A5PLL7|TM189_HUMAN	A5PLL7	11.0813	11.3429	9.89321	11.842	11.6448	9.30074	10.3936	11.7122	10.8563	11.1293	8.91033	9.79646	8.31547	9.7893	11.6	6.44907	10.9147	11.0305	12.0101	12.3705	10.89	9.94969	1.09451	0.200698	0.329798		sp|A5PLL7|TM189_HUMAN	TMEM189	Transmembrane protein 189 OS=Homo sapiens OX=9606 GN=TMEM189 PE=1 SV=3	2	1	10.1825	10.8126	9.61366	11.225	11.2696	8.69485	9.79646	8.11832	9.17976	11.1073	8.63074	9.41467	10.9376	9.88835	9.88732	6.42627	10.6446
sp|A5PLN9|TPC13_HUMAN	A5PLN9	8.34204	9.90245	9.23598	8.80025	8.44156	7.12532	12.736	14.6215	15.259	13.67	10.7983	13.8135	12.1874	10.7105	11.6091	8.51085	9.85999	8.49043	8.01461	8.4064	10.4605	10.082	1.03755	0.720868	0.806207		sp|A5PLN9|TPC13_HUMAN	TRAPPC13	Trafficking protein particle complex subunit 13 OS=Homo sapiens OX=9606 GN=TRAPPC13 PE=1 SV=2	6	3	7.6654	9.43949	8.975	8.34174	8.1696	10.5372	13.8135	11.8985	10.0436	11.116	6.61203	11.5365	13.6545	13.8984	12.1444	8.48076	9.61601
sp|A5YKK6|CNOT1_HUMAN	A5YKK6	10.0587	10.1603	11.1004	10.2838	9.58574	12.9255	12.7402	11.9303	11.9971	11.0129	11.0615	10.836	11.1496	10.12	9.66579	7.6423	8.92356	9.28497	10.2588	9.7751	11.1245	9.81549	1.13336	0.0198954	0.062782		sp|A5YKK6|CNOT1_HUMAN	CNOT1	CCR4-NOT transcription complex subunit 1 OS=Homo sapiens OX=9606 GN=CNOT1 PE=1 SV=2	35	26	9.24278	9.68525	10.7867	9.74796	9.27691	10.794	10.836	10.8853	9.48989	9.25526	11.9944	11.5403	11.1413	10.9274	9.78388	7.61528	8.70275
sp|A5YM72|CRNS1_HUMAN	A5YM72	11.1958	13.8586	11.7323	12.0433	6.92753						6.89015	9.99695	9.30248	14.3005	8.11277						10.8717	9.42418	1.15359	0.42399	0.558097		sp|A5YM72|CRNS1_HUMAN	CARNS1	Carnosine synthase 1 OS=Homo sapiens OX=9606 GN=CARNS1 PE=1 SV=3	3	0	10.2877	13.2107	11.4008	11.4158	6.70434	6.72353	9.99695	9.08193	13.4101	7.7682	0	0	0	0	0	0	0
sp|A6NDG6|PGP_HUMAN	A6NDG6	10.5683	10.157	9.77546	10.7198	10.8682	8.96337	9.75502	10.2593	9.66337	11.8729	9.84722	9.11172	9.48751	12.3009	11.3937	10.7267	13.4974	10.4408	10.4397	10.2555	10.2324	10.6801	1.04376	0.352101	0.491146		sp|A6NDG6|PGP_HUMAN	PGP	Glycerol-3-phosphate phosphatase OS=Homo sapiens OX=9606 GN=PGP PE=1 SV=1	7	7	9.71107	9.68216	9.49924	10.1613	10.5181	9.60908	9.11172	9.26258	11.535	10.9098	8.31767	8.83627	9.58077	8.80174	10.5479	10.6888	13.1634
sp|A6NDU8|CE051_HUMAN	A6NDU8	11.3847	9.88117	8.86533	11.3804	10.0944	10.0666	11.2995	10.8555	9.84772	9.15857	9.46658	8.68853	9.32327	13.3356	11.9205	12.3122	10.8639	10.3384	10.9557	10.1087	10.2467	10.6442	1.0388	0.463066	0.594467		sp|A6NDU8|CE051_HUMAN	C5orf51	UPF0600 protein C5orf51 OS=Homo sapiens OX=9606 GN=C5orf51 PE=1 SV=1	7	2	10.4613	9.41921	8.61483	10.7875	9.76922	9.23765	8.68853	9.10223	12.5052	11.4142	9.34142	10.2353	10.1376	8.96965	8.13648	12.2687	10.5951
sp|A6NED2|RCCD1_HUMAN	A6NED2	9.68615	9.95437	9.5392	8.8482	11.941	13.2275	11.5607	10.0883	12.2307	9.99713	11.8321	8.67358	8.85045	11.88	12.9467	7.77873	12.0957	9.09424	10.4801	9.71667	10.6247	10.1986	1.04179	0.559182	0.67727		sp|A6NED2|RCCD1_HUMAN	RCCD1	RCC1 domain-containing protein 1 OS=Homo sapiens OX=9606 GN=RCCD1 PE=1 SV=1	2	1	8.90049	9.48899	9.26966	8.3872	11.5563	11.546	8.67358	8.64062	11.1403	12.3968	12.2746	10.4719	9.42108	11.1402	8.88146	7.75123	11.7964
sp|A6NFY4|NEMP2_HUMAN	A6NFY4	18.5084	7.76723	9.8716	12.3081	12.6282	8.47946	8.05322	6.54945	8.4527	5.60138	9.81123	7.76294	6.56428	11.9975	7.4271	27.7605	11.2133	7.56492	9.69453	11.217	9.267	10.1326	1.09341	0.607323	0.718862		sp|A6NFY4|NEMP2_HUMAN	NEMP2	Nuclear envelope integral membrane protein 2 OS=Homo sapiens OX=9606 GN=NEMP2 PE=2 SV=3	1	1	17.0072	7.4041	9.59266	11.6668	12.2214	9.57397	7.76294	6.40865	11.2505	7.11165	7.86862	7.29475	6.11631	7.69902	4.97627	27.6624	10.9358
sp|A6NHL2|TBAL3_HUMAN	A6NHL2	6.05393	6.90796	5.90634	7.76116	6.89037						19.0974	20.4192	18.0617	6.03833	5.99129						6.67075	12.0571	1.80745	0.0734722	0.15969		sp|A6NHL2|TBAL3_HUMAN	TUBAL3	Tubulin alpha chain-like 3 OS=Homo sapiens OX=9606 GN=TUBAL3 PE=1 SV=2	1	0	5.56289	6.585	5.73945	7.35679	6.66838	18.6356	20.4192	17.6335	5.66235	5.73682	0	0	0	0	0	0	0
sp|A6NHQ2|FBLL1_HUMAN	A6NHQ2	10.9011	12.0821	10.9817	10.3812	11.0925	15.7238	11.3363	10.6109	11.7672	11.2394	8.75358	8.81553	9.80929	10.2338	11.1625	8.19373	9.16982	8.18286	10.3477	9.90365	11.5339	9.41078	1.2256	0.000711712	0.00640225	2	sp|A6NHQ2|FBLL1_HUMAN	FBLL1	rRNA/tRNA 2'-O-methyltransferase fibrillarin-like protein 1 OS=Homo sapiens OX=9606 GN=FBLL1 PE=3 SV=2	4	5	10.0169	11.5172	10.6714	9.8403	10.7351	8.54189	8.81553	9.57673	9.59654	10.6884	14.5911	10.2686	9.90917	10.718	9.98507	8.16476	8.94291
sp|A6NHR9|SMHD1_HUMAN	A6NHR9	11.8382	11.6098	11.701	11.48	11.7793	13.0913	10.8518	11.192	10.6184	11.5151	9.15161	9.00942	8.90711	8.98777	9.75329	8.67953	9.54189	10.8296	9.97063	9.9602	11.5508	9.45903	1.22114	1.22187e-06	0.000151077	1	sp|A6NHR9|SMHD1_HUMAN	SMCHD1	Structural maintenance of chromosomes flexible hinge domain-containing protein 1 OS=Homo sapiens OX=9606 GN=SMCHD1 PE=1 SV=2	27	19	10.878	11.067	11.3704	10.8819	11.3998	8.9303	9.00942	8.69594	8.42814	9.33904	12.1482	9.82978	10.4518	9.6716	10.23	8.64884	9.30578
sp|A6NHX0|CAST2_HUMAN	A6NHX0	10.1119	10.2081	9.52542	10.6046	10.299	9.16514	14.2568	12.8526	12.7298	14.15	10.8424	9.12198	10.5096	11.5756	11.3674	7.04614	9.37902	7.8743	9.06441	10.2735	11.2504	9.59706	1.17228	0.0422407	0.106886		sp|A6NHX0|CAST2_HUMAN	CASTOR2	Cytosolic arginine sensor for mTORC1 subunit 2 OS=Homo sapiens OX=9606 GN=CASTOR2 PE=1 SV=3	3	2	9.29171	9.73083	9.25627	10.0521	9.96715	10.5802	9.12198	10.2604	10.8548	10.8846	8.5049	12.9141	12.0026	11.5948	12.5709	7.02123	9.14694
sp|A6NI28|RHG42_HUMAN	A6NI28	9.6692	12.3411	11.3037	12.4452	10.0021	10.7436	16.6956	17.7182	14.7818	10.5352	8.08134	11.3905	8.17359	10.5312	10.191	4.13696	5.60536	7.85858	10.7121	8.33613	12.3583	8.1632	1.51391	0.00283126	0.016512	2	sp|A6NI28|RHG42_HUMAN	ARHGAP42	Rho GTPase-activating protein 42 OS=Homo sapiens OX=9606 GN=ARHGAP42 PE=1 SV=3	2	2	8.88492	11.7641	10.9843	11.7968	9.67987	7.88591	11.3905	7.97981	9.8755	9.7582	9.96966	15.1232	16.5464	13.4638	9.35951	4.12233	5.46666
sp|A6NIH7|U119B_HUMAN	A6NIH7	8.92323	8.94434	9.86403	8.56897	8.79611	11.3287	10.723	12.3425	13.6302	9.27546	12.323	12.5258	13.0054	10.2717	10.625	10.6073	9.93321	9.5955	8.94537	9.76631	10.1183	10.6825	1.05575	0.412988	0.548359		sp|A6NIH7|U119B_HUMAN	UNC119B	Protein unc-119 homolog B OS=Homo sapiens OX=9606 GN=UNC119B PE=1 SV=1	4	4	8.19945	8.52618	9.58531	8.12251	8.51272	12.025	12.5258	12.6971	9.63216	10.1737	10.5126	9.71312	11.5262	12.4149	8.24033	10.5698	9.68741
sp|A6NJ78|MET15_HUMAN	A6NJ78						14.5013	10.8584	10.8365	10.4599	11.2678						8.05608	9.29963	11.9494	9.82089	9.21075	11.4997	9.58687	1.19952	0.0708363	0.155877		sp|A6NJ78|MET15_HUMAN	METTL15	Probable methyltransferase-like protein 15 OS=Homo sapiens OX=9606 GN=METTL15 PE=1 SV=1	0	1	0	0	0	0	0	0	0	0	0	0	13.4567	9.83575	10.1198	9.52722	10.0103	8.0276	9.06951
sp|A6NKD9|CC85C_HUMAN	A6NKD9	11.2357	9.42379	11.744	9.01178	11.9068						8.6744	10.6225	8.20523	9.89895	13.4037						10.5938	10.0063	1.05871	0.601001	0.714403		sp|A6NKD9|CC85C_HUMAN	CCDC85C	Coiled-coil domain-containing protein 85C OS=Homo sapiens OX=9606 GN=CCDC85C PE=1 SV=1	1	0	10.3244	8.98321	11.4122	8.54225	11.5232	8.46463	10.6225	8.0107	9.28258	12.8344	0	0	0	0	0	0	0
sp|A6NKF1|SAC31_HUMAN	A6NKF1	6.81337	7.66693	9.59537	8.88453	9.68945						17.1407	8.81137	12.5934	12.055	10.6219						8.45271	11.9486	1.41358	0.0280289	0.0798052		sp|A6NKF1|SAC31_HUMAN	SAC3D1	SAC3 domain-containing protein 1 OS=Homo sapiens OX=9606 GN=SAC3D1 PE=1 SV=2	1	0	6.26073	7.30849	9.32424	8.42163	9.37728	16.7262	8.81137	12.2948	11.3044	10.1708	0	0	0	0	0	0	0
sp|A6NNF4|ZN726_HUMAN	A6NNF4	4.70357	6.62898	6.01537	6.20865	4.5722						16.7852	25.0793	23.4052	5.27975	4.11847						5.56227	11.6461	2.09377	0.0915046	0.187914		sp|A6NNF4|ZN726_HUMAN	ZNF726	Zinc finger protein 726 OS=Homo sapiens OX=9606 GN=ZNF726 PE=1 SV=4	2	0	4.32206	6.31906	5.8454	5.88517	4.4249	16.3793	25.0793	22.8503	4.951	3.94355	0	0	0	0	0	0	0
sp|A7E2V4|ZSWM8_HUMAN	A7E2V4						10.1918	9.54242	10.9806	11.3514	10.6608						6.76617	11.5387	10.2993	13.4269	11.3596	10.5263	10.4167	1.01052	0.940157	0.959846		sp|A7E2V4|ZSWM8_HUMAN	ZSWIM8	Zinc finger SWIM domain-containing protein 8 OS=Homo sapiens OX=9606 GN=ZSWIM8 PE=1 SV=1	0	1	0	0	0	0	0	0	0	0	0	0	9.45763	8.6437	10.2544	10.3393	9.47105	6.74225	11.2532
sp|A8K855|EFCB7_HUMAN	A8K855	11.8643	13.572	12.2738	11.6214	12.4161	11.2815	14.3389	14.4256	9.95004	12.9079	8.18549	8.44699	8.02022	8.26426	9.59479	6.91246	5.88608	10.0727	11.4769	9.44014	12.3931	8.49294	1.45923	3.95168e-05	0.0011302	2	sp|A8K855|EFCB7_HUMAN	EFCAB7	EF-hand calcium-binding domain-containing protein 7 OS=Homo sapiens OX=9606 GN=EFCAB7 PE=1 SV=1	2	1	10.902	12.9375	11.927	11.0159	12.0161	7.98754	8.44699	7.83007	7.74968	9.18727	10.4688	12.9884	13.4716	9.06285	11.4674	6.88802	5.74043
sp|A8MSI8|LYRM9_HUMAN	A8MSI8	8.73068	9.04333	9.02781	8.96814	9.95335	12.5907	9.5505	10.7835	9.821	12.2972	11.9228	11.7366	12.1119	10.3499	12.0617	7.94202	11.9831	11.4716	9.18135	10.5178	9.99637	10.8354	1.08393	0.202019	0.331146		sp|A8MSI8|LYRM9_HUMAN	LYRM9	LYR motif-containing protein 9 OS=Homo sapiens OX=9606 GN=LYRM9 PE=3 SV=2	2	1	8.02252	8.62054	8.77272	8.50089	9.63268	11.6345	11.7366	11.8247	9.70542	11.5494	11.6837	8.65102	10.0703	8.94532	10.9248	7.91394	11.6866
sp|A8MTT3|CEBOS_HUMAN	A8MTT3	18.4128	12.4624	10.1924	15.3941	8.65945	4.30736	7.4325	14.8609	15.8233	11.4267	6.25694	7.23322	5.69844	9.86461	10.6227	6.62766	6.38368	22.3488	8.25392	8.50816	11.0368	8.4216	1.31054	0.163286	0.284552		sp|A8MTT3|CEBOS_HUMAN	CEBPZOS	Protein CEBPZOS OS=Homo sapiens OX=9606 GN=CEBPZOS PE=1 SV=2	1	1	16.9193	11.8798	9.90439	14.592	8.38047	6.10563	7.23322	5.56334	9.25038	10.1715	3.99707	6.73249	13.8781	14.4124	10.1515	6.60423	6.22572
sp|A8MV23|SERP3_HUMAN	A8MV23	7.78073	9.90003	8.01481	6.46684	3.51589	6.6294	10.0006	14.7589	16.7944	8.21451	12.6959	20.2489	16.6552	14.3122	3.94061	5.59865	5.5455	11.8568	12.448	14.4832	8.46754	10.483	1.23802	0.339979	0.478538		sp|A8MV23|SERP3_HUMAN	SERPINE3	Serpin E3 OS=Homo sapiens OX=9606 GN=SERPINE3 PE=2 SV=2	12	20	7.14962	9.43719	7.78834	6.12991	3.40262	12.3889	20.2489	16.2603	13.421	3.77324	6.15183	9.05869	13.7828	15.2969	7.29778	5.57886	5.40828
sp|A8MVW0|F1712_HUMAN	A8MVW0	11.5642	13.2666	10.9292	13.6677	11.6614	12.1149	9.19912	11.4188	10.3134	8.74263	7.78781	9.62098	8.77754	8.60448	8.36227	11.5703	8.17389	11.5749	10.8594	11.843	11.1857	9.60199	1.16494	0.038968	0.101036		sp|A8MVW0|F1712_HUMAN	FAM171A2	Protein FAM171A2 OS=Homo sapiens OX=9606 GN=FAM171A2 PE=1 SV=1	5	6	10.6262	12.6464	10.6204	12.9556	11.2857	7.59948	9.62098	8.56944	8.06871	8.0071	11.2422	8.33273	10.6636	9.39385	7.76696	11.5294	7.97163
sp|A8MWY0|K132L_HUMAN	A8MWY0	8.08037	9.50113	11.0328	10.3211	11.704	15.6725	9.5041	12.9057	12.7643	11.2919	9.4235	13.24	13.7147	7.88338	8.84481	8.51441	7.82784	12.1796	7.60264	8.12579	11.0983	9.49936	1.16832	0.115262	0.220615		sp|A8MWY0|K132L_HUMAN	KIAA1324L	UPF0577 protein KIAA1324-like OS=Homo sapiens OX=9606 GN=KIAA1324L PE=1 SV=2	1	1	7.42496	9.05694	10.7211	9.78337	11.3269	9.19561	13.24	13.3895	7.39251	8.46914	14.5435	8.60899	12.0522	11.6262	10.0317	8.48431	7.63414
sp|A8MXV4|NUD19_HUMAN	A8MXV4	14.481	11.7353	11.764	11.7563	8.6992	9.06786	7.99737	11.3662	13.3605	9.33688	7.75106	8.51242	9.18961	11.261	9.30002	7.07935	7.50892	14.9825	11.7949	13.4539	10.7713	9.78243	1.10109	0.360773	0.501129		sp|A8MXV4|NUD19_HUMAN	NUDT19	Nucleoside diphosphate-linked moiety X motif 19 OS=Homo sapiens OX=9606 GN=NUDT19 PE=1 SV=1	5	7	13.3064	11.1867	11.4316	11.1438	8.41894	7.56362	8.51242	8.97174	10.5598	8.90502	8.41463	7.24416	10.6145	12.1692	8.29489	7.05432	7.32311
sp|A9UHW6|MI4GD_HUMAN	A9UHW6						6.10414	9.79883	12.0669	12.1494	11.6357						11.0008	10.4759	11.4164	10.8185	10.49	10.0403	10.8347	1.07912	0.582968	0.698625		sp|A9UHW6|MI4GD_HUMAN	MIF4GD	MIF4G domain-containing protein OS=Homo sapiens OX=9606 GN=MIF4GD PE=1 SV=1	0	1	0	0	0	0	0	0	0	0	0	0	5.66441	8.87596	11.2689	11.0661	10.3372	10.9619	10.2167
sp|B0YJ81|HACD1_HUMAN	B0YJ81	10.0443	12.8579	11.0944	11.2368	10.1772	19.6131	16.9191	13.3888	11.7167	13.4696	9.23749	9.15303	8.95084	8.52889	12.8754	4.51774	4.71923	7.59162	7.31912	8.11293	12.7652	7.76676	1.64357	0.000618186	0.00587663	2	sp|B0YJ81|HACD1_HUMAN	HACD1	Very-long-chain (3R)-3-hydroxyacyl-CoA dehydratase 1 OS=Homo sapiens OX=9606 GN=HACD1 PE=1 SV=1	3	1	9.22957	12.2568	10.7809	10.6513	9.84935	9.0141	9.15303	8.73863	7.99783	12.3285	18.2002	15.3256	12.5033	10.672	11.9664	4.50177	4.60245
sp|B1AK53|ESPN_HUMAN	B1AK53	16.7856	11.4022	15.3761	12.0134	7.57027	11.4918	6.19048	14.9232	13.9094	5.69863	6.00539	15.4711	7.46409	8.77264	3.34886	2.25545	3.21686	19.9127	12.251	16.0748	10.8458	7.52174	1.44192	0.200041	0.329075		sp|B1AK53|ESPN_HUMAN	ESPN	Espin OS=Homo sapiens OX=9606 GN=ESPN PE=1 SV=1	1	2	15.4241	10.8691	14.9416	11.3875	7.32638	5.86016	15.4711	7.28713	8.2264	3.20662	10.664	5.60745	13.9363	12.6692	5.06267	2.24748	3.13726
sp|B2RTY4|MYO9A_HUMAN	B2RTY4	6.00674	8.13374	11.6163	11.6073	10.3214						11.2139	11.6022	13.2597	9.34549	10.6459						9.2575	11.141	1.20345	0.21778	0.349349		sp|B2RTY4|MYO9A_HUMAN	MYO9A	Unconventional myosin-IXa OS=Homo sapiens OX=9606 GN=MYO9A PE=1 SV=2	1	0	5.51952	7.75347	11.2881	11.0025	9.98892	10.9427	11.6022	12.9453	8.76358	10.1937	0	0	0	0	0	0	0
sp|B2RUZ4|SMIM1_HUMAN	B2RUZ4	9.02453	10.1017	11.8481	9.11343	10.471	14.0175	13.6628	8.13044	8.45471	10.5156	12.504	10.0527	11.6951	8.96698	10.1425	13.5352	9.93258	10.4385	9.33936	7.95626	10.3619	10.3379	1.00233	0.974498	0.983551		sp|B2RUZ4|SMIM1_HUMAN	SMIM1	Small integral membrane protein 1 OS=Homo sapiens OX=9606 GN=SMIM1 PE=1 SV=1	1	1	8.29254	9.62947	11.5133	8.63861	10.1337	12.2016	10.0527	11.4178	8.40864	9.71169	13.0077	12.376	7.59274	7.70085	9.34211	13.4873	9.6868
sp|B3KU38|IQIP1_HUMAN	B3KU38						11.2591	11.2365	11.6034	10.2261	16.4001						12.2085	7.01318	7.42631	10.4869	8.69131	11.9744	8.96637	1.33548	0.0604655	0.138227		sp|B3KU38|IQIP1_HUMAN	IQCJ-SCHIP1	IQCJ-SCHIP1 readthrough transcript protein OS=Homo sapiens OX=9606 GN=IQCJ-SCHIP1 PE=1 SV=2	0	1	0	0	0	0	0	0	0	0	0	0	10.448	10.1782	10.836	9.31432	14.5699	12.1653	6.83964
sp|B5ME19|EIFCL_HUMAN	B5ME19	10.8298	10.9848	10.4611	9.80123	10.3681	10.7257	11.0172	11.7193	11.9943	10.4207	8.79301	9.95531	9.2475	12.8277	10.9598	7.95453	9.56834	10.6982	10.9831	11.1392	10.8149	10.1263	1.068	0.18396	0.310824		sp|B5ME19|EIFCL_HUMAN	EIF3CL	Eukaryotic translation initiation factor 3 subunit C-like protein OS=Homo sapiens OX=9606 GN=EIF3CL PE=1 SV=1	35	36	9.95138	10.4712	10.1655	9.29057	10.0341	8.58037	9.95531	9.02826	12.029	10.4943	9.95305	9.97954	10.9443	10.9248	9.25778	7.92641	9.33157
sp|B7ZAQ6|GPHRA_HUMAN	B7ZAQ6	11.3634	10.8855	10.2787	11.8808	11.7348	14.9684	9.89732	11.0336	10.948	10.7141	9.98359	8.15581	11.1665	11.5426	7.2595	7.33899	7.85005	10.1069	11.4108	12.0486	11.3014	9.51757	1.18742	0.0295868	0.0826627		sp|B7ZAQ6|GPHRA_HUMAN	GPR89A	Golgi pH regulator A OS=Homo sapiens OX=9606 GN=GPR89A PE=1 SV=2	7	11	10.4417	10.3766	9.98829	11.2618	11.3567	9.74216	8.15581	10.9018	10.8239	6.95117	13.8901	8.96517	10.3039	9.97184	9.51843	7.31304	7.6558
sp|B7ZBB8|PP13G_HUMAN	B7ZBB8	9.27425	11.212	8.89336	12.5708	17.4773						11.2875	9.67411	7.46654	6.60806	9.54898						11.5232	8.75531	1.31614	0.115431	0.220735		sp|B7ZBB8|PP13G_HUMAN	PPP1R3G	Protein phosphatase 1 regulatory subunit 3G OS=Homo sapiens OX=9606 GN=PPP1R3G PE=1 SV=1	1	0	8.522	10.6878	8.64207	11.9158	16.9142	11.0145	9.67411	7.28952	6.1966	9.14341	0	0	0	0	0	0	0
sp|C9J798|RAS4B_HUMAN	C9J798	14.7614	10.2213	11.1035	8.00174	16.7808						9.29595	6.12731	8.90637	7.87879	11.2747						11.7603	8.5264	1.37928	0.0887666	0.184244		sp|C9J798|RAS4B_HUMAN	RASA4B	Ras GTPase-activating protein 4B OS=Homo sapiens OX=9606 GN=RASA4B PE=3 SV=2	1	0	13.5641	9.74346	10.7898	7.58484	16.2402	9.07115	6.12731	8.69521	7.38821	10.7958	0	0	0	0	0	0	0
sp|C9J7I0|UMAD1_HUMAN	C9J7I0	10.7544	10.444	10.0559	9.42129	9.0582	7.08819	8.61658	10.2753	10.9683	10.6618	10.1352	13.6521	11.5839	11.2132	7.65215	18.3	10.6315	11.5493	8.28789	9.06589	9.65975	10.8789	1.12621	0.201436	0.33037		sp|C9J7I0|UMAD1_HUMAN	UMAD1	UBAP1-MVB12-associated (UMA)-domain containing protein 1 OS=Homo sapiens OX=9606 GN=UMAD1 PE=2 SV=2	2	1	9.8821	9.95571	9.77175	8.93043	8.76637	9.89012	13.6521	11.3093	10.515	7.32714	6.57757	7.80505	9.59577	9.99033	9.47195	18.2353	10.3684
sp|C9JLW8|MCRI1_HUMAN	C9JLW8	8.24308	11.1781	12.8224	11.8323	10.8097	12.7867	12.9868	8.55397	8.18588	11.6207	11.4716	10.3617	9.54398	10.0656	7.64504	12.6523	9.7825	10.3506	10.0227	9.08471	10.74	10.0182	1.07205	0.346122	0.484673		sp|C9JLW8|MCRI1_HUMAN	MCRIP1	Mapk-regulated corepressor-interacting protein 1 OS=Homo sapiens OX=9606 GN=MCRIP1 PE=1 SV=1	1	2	7.57447	10.6555	12.4601	11.2158	10.4614	11.1942	10.3617	9.31771	9.43884	7.32033	11.8656	11.7637	7.98826	7.45599	10.3238	12.6076	9.54043
sp|E0CX11|STMP1_HUMAN	E0CX11						8.33196	10.3621	10.854	11.4714	11.3232						19.8934	9.07648	9.34223	8.6128	6.41956	10.401	9.86156	1.0547	0.80463	0.86871		sp|E0CX11|STMP1_HUMAN	STMP1	Short transmembrane mitochondrial protein 1 OS=Homo sapiens OX=9606 GN=STMP1 PE=1 SV=1	0	1	0	0	0	0	0	0	0	0	0	0	7.73174	9.38619	10.1362	10.4486	10.0595	19.8231	8.85188
sp|E9PAV3|NACAM_HUMAN	E9PAV3	11.3264	10.1125	10.6241	10.4034	10.8488	9.3508	11.3394	10.117	10.5198	10.0045	9.83994	9.3775	9.56662	10.7221	11.3773	11.2991	11.4436	10.8525	10.5545	10.3979	10.4484	10.5188	1.00674	0.820781	0.880276		sp|E9PAV3|NACAM_HUMAN	NACA	Nascent polypeptide-associated complex subunit alpha, muscle-specific form OS=Homo sapiens OX=9606 GN=NACA PE=1 SV=1	7	14	10.4077	9.63973	10.3239	9.86137	10.4993	9.60198	9.3775	9.33981	10.0545	10.8941	8.67719	10.2714	9.44796	9.58181	8.88797	11.2592	11.1604
sp|E9PRG8|CK098_HUMAN	E9PRG8	10.7774	11.0263	10.649	10.4905	12.7456						9.60135	10.447	10.2284	8.9027	9.19921						11.1092	9.65785	1.15028	0.0170634	0.0565188		sp|E9PRG8|CK098_HUMAN	C11orf98	Uncharacterized protein C11orf98 OS=Homo sapiens OX=9606 GN=C11orf98 PE=4 SV=2	2	0	9.90322	10.5108	10.3481	9.94397	12.335	9.36916	10.447	9.98588	8.34837	8.80849	0	0	0	0	0	0	0
sp|G2XKQ0|SUMO5_HUMAN	G2XKQ0						10.3105	7.07532	7.18809	8.34672	11.2219						13.3603	14.8019	10.5835	9.81173	12.7465	8.67451	12.1222	1.39745	0.0238254	0.0710002		sp|G2XKQ0|SUMO5_HUMAN	SUMO1P1	Small ubiquitin-related modifier 5 OS=Homo sapiens OX=9606 GN=SUMO1P1 PE=1 SV=2	0	3	0	0	0	0	0	0	0	0	0	0	9.56779	6.40895	6.71271	7.60249	9.96957	13.3131	14.4356
sp|L0R6Q1|S35U4_HUMAN	L0R6Q1	13.0967	13.1189	14.286	12.9361	12.3424	10.5019	6.88108	10.0808	10.5263	8.68737	6.38195	7.86542	7.10018	8.91816	8.3372	7.19555	9.98476	11.8085	14.9851	15.1	11.0072	9.34646	1.17768	0.192993	0.321195		sp|L0R6Q1|S35U4_HUMAN	SLC35A4	SLC35A4 upstream open reading frame protein OS=Homo sapiens OX=9606 GN=SLC35A4 PE=3 SV=1	7	7	12.0344	12.5056	13.8823	12.2621	11.9448	6.22762	7.86542	6.93185	8.36286	7.98309	9.7454	6.23301	9.41413	9.58771	7.71787	7.17011	9.73769
sp|O00115|DNS2A_HUMAN	O00115	13.0682	11.5544	12.0732	11.8922	8.97844	11.8686	10.3903	10.5101	11.2105	12.2815	8.29667	9.68163	7.67088	11.3613	9.77849	13.1105	10.5267	8.60481	9.09256	8.51834	11.326	9.54792	1.18622	0.012265	0.0446721		sp|O00115|DNS2A_HUMAN	DNASE2	Deoxyribonuclease-2-alpha OS=Homo sapiens OX=9606 GN=DNASE2 PE=1 SV=2	4	8	12.0082	11.0142	11.7321	11.2726	8.68918	8.09603	9.68163	7.48902	10.6539	9.36317	11.0136	9.41172	9.81501	10.2109	10.9109	13.0641	10.2662
sp|O00116|ADAS_HUMAN	O00116	11.2158	11.0133	10.8525	11.6435	9.66424	9.82454	9.79283	10.2878	10.1379	9.87383	9.60283	9.96893	10.0286	9.88033	10.302	10.7635	11.3916	11.0401	10.6579	12.0336	10.41	10.5428	1.01276	0.683916	0.778038		sp|O00116|ADAS_HUMAN	AGPS	Alkyldihydroxyacetonephosphate synthase, peroxisomal OS=Homo sapiens OX=9606 GN=AGPS PE=1 SV=1	17	22	10.3061	10.4984	10.5458	11.0369	9.35288	9.3706	9.96893	9.79087	9.26512	9.86441	9.1168	8.87052	9.60743	9.23392	8.77192	10.7254	11.1097
sp|O00139|KIF2A_HUMAN	O00139	8.74435	10.0273	10.5352	9.82437	9.17171	11.0622	10.6698	10.3899	9.78611	9.33621	11.5064	12.7757	10.915	9.96158	10.4216	11.4329	10.339	11.2625	11.1414	10.4036	9.93047	10.9901	1.1067	0.00601559	0.0278068		sp|O00139|KIF2A_HUMAN	KIF2A	Kinesin-like protein KIF2A OS=Homo sapiens OX=9606 GN=KIF2A PE=1 SV=3	11	10	8.03508	9.55855	10.2375	9.31251	8.87622	11.2281	12.7757	10.6562	9.34131	9.97894	10.2653	9.66486	9.70278	8.91354	8.2943	11.3925	10.0832
sp|O00142|KITM_HUMAN	O00142	14.4605	11.9717	13.5857	12.0992	11.1378	9.7983	10.9997	9.93399	11.0768	11.6076	6.54291	8.45862	6.73587	8.6071	10.8196	8.67094	11.2258	11.0664	10.9877	10.7514	11.5872	9.21551	1.25736	0.00736212	0.0316143	1	sp|O00142|KITM_HUMAN	TK2	Thymidine kinase 2, mitochondrial OS=Homo sapiens OX=9606 GN=TK2 PE=1 SV=4	1	2	13.2876	11.412	13.2018	11.4688	10.779	6.38468	8.45862	6.57617	8.07117	10.3601	9.09245	9.96372	9.27702	10.0891	10.3122	8.64028	10.948
sp|O00148|DX39A_HUMAN	O00148	12.1491	13.3451	10.3823	14.4402	13.2923						6.54993	5.77526	5.11087	11.905	11.6489						12.6435	7.68534	1.64514	0.0285957	0.0807239		sp|O00148|DX39A_HUMAN	DDX39A	ATP-dependent RNA helicase DDX39A OS=Homo sapiens OX=9606 GN=DDX39A PE=1 SV=2	2	0	11.1637	12.7212	10.0889	13.6878	12.8641	6.39153	5.77526	4.9897	11.1637	11.1541	0	0	0	0	0	0	0
sp|O00151|PDLI1_HUMAN	O00151	12.1291	8.95983	6.76369	18.1115	16.7373	4.60475	4.83686	6.9327	6.98153	5.8003	5.62988	5.88307	5.56883	12.3407	12.521	22.209	27.8272	8.72463	8.04817	8.16718	8.21112	10.01	1.21908	0.41087	0.546462		sp|O00151|PDLI1_HUMAN	PDLIM1	PDZ and LIM domain protein 1 OS=Homo sapiens OX=9606 GN=PDLIM1 PE=1 SV=4	9	13	11.1453	8.54094	6.57257	17.1679	16.1981	5.49373	5.88307	5.4368	11.5723	11.9892	4.27303	4.38132	6.47421	6.35903	5.15299	22.1305	27.1386
sp|O00154|BACH_HUMAN	O00154	9.23301	10.1996	9.87165	11.3667	10.0984	10.8087	11.2269	11.9924	11.7843	12.2778	10.0044	10.2046	9.25546	12.5963	11.3185	11.7679	8.51243	8.85473	9.88376	9.16785	10.8432	10.0798	1.07573	0.165703	0.287775		sp|O00154|BACH_HUMAN	ACOT7	Cytosolic acyl coenzyme A thioester hydrolase OS=Homo sapiens OX=9606 GN=ACOT7 PE=1 SV=3	7	11	8.48411	9.72272	9.59271	10.7745	9.77307	9.76244	10.2046	9.03603	11.812	10.8378	10.0301	10.1695	11.1993	10.7336	10.9076	11.7263	8.30179
sp|O00159|MYO1C_HUMAN	O00159	8.22471	9.3268	8.33172	9.74553	9.65309	7.5157	12.1465	9.34549	9.58406	14.4102	12.863	9.40771	11.3264	11.6787	13.479	10.1671	15.7157	8.3922	9.61626	9.25605	9.66118	10.9921	1.13776	0.154355	0.273056		sp|O00159|MYO1C_HUMAN	MYO1C	Unconventional myosin-Ic OS=Homo sapiens OX=9606 GN=MYO1C PE=1 SV=4	38	50	7.55759	8.89076	8.0963	9.23777	9.34209	12.5519	9.40771	11.0579	10.9515	12.9065	6.97429	11.0025	8.72744	8.7295	12.802	10.1312	15.3268
sp|O00161|SNP23_HUMAN	O00161	11.4562	13.1887	12.8573	12.2059	9.80205	12.0093	10.0463	10.5878	10.0704	8.45736	8.10887	9.89173	9.50065	10.3451	6.86116	12.4535	10.0648	9.25568	11.4335	11.4114	10.9721	9.80199	1.11937	0.129	0.239046		sp|O00161|SNP23_HUMAN	SNAP23	Synaptosomal-associated protein 23 OS=Homo sapiens OX=9606 GN=SNAP23 PE=1 SV=1	14	14	10.527	12.5721	12.494	11.57	9.48625	7.91277	9.89173	9.27541	9.70094	6.56975	11.1442	9.10013	9.88757	9.17246	7.51353	12.4095	9.81573
sp|O00165|HAX1_HUMAN	O00165	11.8038	10.9073	11.5733	10.5808	11.4305	12.967	8.39363	7.74072	6.39613	7.4883	9.367	9.63236	8.97978	9.14108	10.7637	15.8348	13.2463	12.0064	10.3419	10.7266	9.68646	10.8336	1.11843	0.255645	0.391735		sp|O00165|HAX1_HUMAN	HAX1	HCLS1-associated protein X-1 OS=Homo sapiens OX=9606 GN=HAX1 PE=1 SV=2	6	3	10.8464	10.3974	11.2463	10.0295	11.0622	9.14048	9.63236	8.76688	8.5719	10.3065	12.0329	7.6031	7.2288	5.82582	6.65261	15.7788	12.9185
sp|O00170|AIP_HUMAN	O00170	10.0971	9.10735	9.8833	9.92281	10.0794	9.82636	11.7722	10.4504	10.6178	12.0429	11.3275	10.3267	10.3558	11.1442	11.8378	9.63997	10.0917	9.55196	11.4615	10.7498	10.346	10.6228	1.02676	0.467381	0.597871		sp|O00170|AIP_HUMAN	AIP	AH receptor-interacting protein OS=Homo sapiens OX=9606 GN=AIP PE=1 SV=2	17	13	9.27808	8.68157	9.60403	9.40582	9.75464	11.0536	10.3267	10.1103	10.4503	11.335	9.11849	10.6635	9.7593	9.67105	10.6989	9.60589	9.842
sp|O00178|GTPB1_HUMAN	O00178	8.92796	9.20743	9.06075	8.95556	8.89547	9.21855	9.12139	12.6073	11.3435	11.332	12.1244	12.6939	12.0036	11.7642	10.2774	10.4807	9.57299	11.3801	10.0948	10.8544	9.78976	11.0823	1.13203	0.0242102	0.0718372		sp|O00178|GTPB1_HUMAN	GTPBP1	GTP-binding protein 1 OS=Homo sapiens OX=9606 GN=GTPBP1 PE=1 SV=3	11	10	8.2038	8.77697	8.80473	8.48896	8.60888	11.8312	12.6939	11.719	11.0317	9.84085	8.55447	8.26232	11.7735	10.3321	10.0674	10.4436	9.33611
sp|O00180|KCNK1_HUMAN	O00180	10.0127	11.4524	8.15828	11.21	10.7296	8.84658	4.67982	6.27203	6.98474	9.30276	9.05897	12.1493	12.5329	10.4326	8.28893	15.2088	14.8183	12.2751	12.8402	13.7007	8.46917	11.9229	1.4078	0.00613747	0.0280839	3	sp|O00180|KCNK1_HUMAN	KCNK1	Potassium channel subfamily K member 1 OS=Homo sapiens OX=9606 GN=KCNK1 PE=1 SV=1	1	3	9.20055	10.917	7.92776	10.6259	10.3839	8.8399	12.1493	12.2358	9.78302	7.93687	8.20929	4.23907	5.85724	6.36195	8.26458	15.155	14.4516
sp|O00186|STXB3_HUMAN	O00186	11.1635	10.6513	11.1973	10.8401	11.877	11.2361	9.14588	10.0419	9.93532	9.56187	9.57193	9.61337	9.35637	9.42505	10.4556	8.66913	11.531	11.4683	11.6797	12.5771	10.5328	10.3633	1.01636	0.736365	0.818004		sp|O00186|STXB3_HUMAN	STXBP3	Syntaxin-binding protein 3 OS=Homo sapiens OX=9606 GN=STXBP3 PE=1 SV=2	16	20	10.258	10.1533	10.8809	10.2753	11.4944	9.34045	9.61337	9.13455	8.83819	10.0115	10.4267	8.2845	9.37778	9.04944	8.49477	8.63848	11.2457
sp|O00192|ARVC_HUMAN	O00192	13.8768	12.8044	11.8784	11.0173	13.2531	12.4973	9.1141	12.9464	12.3514	8.72194	7.09005	10.1273	7.85233	8.7226	7.66477	8.57096	8.24795	11.4099	11.1991	11.02	11.7214	9.06631	1.29286	0.00271362	0.0160976	1	sp|O00192|ARVC_HUMAN	ARVCF	Armadillo repeat protein deleted in velo-cardio-facial syndrome OS=Homo sapiens OX=9606 GN=ARVCF PE=1 SV=1	24	12	12.7512	12.2058	11.5428	10.4433	12.8261	6.91859	10.1273	7.66616	8.17948	7.33922	11.597	8.25572	12.0902	11.2501	7.74858	8.54066	8.04386
sp|O00193|SMAP_HUMAN	O00193	16.9774	11.0838	13.2497	14.8152	11.1092	8.88612	7.11887	10.9085	9.50945	11.4601	5.44718	6.17142	6.5161	10.8942	8.4591	13.3677	11.4637	14.1774	8.77075	9.87616	11.1928	9.07751	1.23303	0.127166	0.236744		sp|O00193|SMAP_HUMAN	SMAP	Small acidic protein OS=Homo sapiens OX=9606 GN=SMAP PE=1 SV=1	11	9	15.6003	10.5656	12.8753	14.0433	10.7513	5.31545	6.17142	6.36161	10.2159	8.09982	8.24598	6.4484	10.1871	8.66155	10.1812	13.3204	11.18
sp|O00203|AP3B1_HUMAN	O00203	9.014	9.69938	9.06828	8.93384	9.13656	7.92631	10.8494	12.5836	12.9254	10.2572	11.1931	12.9863	11.5878	11.6065	10.6972	7.44796	8.81715	10.3427	12.5326	12.5431	9.92604	10.8364	1.09172	0.249633	0.385865		sp|O00203|AP3B1_HUMAN	AP3B1	AP-3 complex subunit beta-1 OS=Homo sapiens OX=9606 GN=AP3B1 PE=1 SV=3	44	48	8.28286	9.24592	8.81204	8.46837	8.8422	10.9224	12.9863	11.3131	10.8838	10.2429	7.35532	9.82761	11.7514	11.7729	9.11247	7.42163	8.59897
sp|O00213|APBB1_HUMAN	O00213	8.0716	8.66782	9.99236	8.81572	8.61722	10.9081	10.8675	8.79894	10.9584	8.11251	13.3098	12.4624	11.6936	9.59689	12.5828	11.2951	14.1347	9.23194	10.9561	10.4836	9.31617	11.477	1.23194	0.00221867	0.0139912	4	sp|O00213|APBB1_HUMAN	APBB1	Amyloid-beta A4 precursor protein-binding family B member 1 OS=Homo sapiens OX=9606 GN=APBB1 PE=1 SV=2	3	1	7.4169	8.26259	9.71001	8.35641	8.3396	12.9879	12.4624	11.4164	8.99933	12.0484	10.1223	9.84394	8.21703	9.98133	7.20716	11.2552	13.7849
sp|O00214|LEG8_HUMAN	O00214						8.21806	10.7941	9.45935	7.70933	11.8126						9.12675	13.4148	11.118	12.6925	11.4939	9.47622	11.4707	1.21047	0.103515	0.204848		sp|O00214|LEG8_HUMAN	LGALS8	Galectin-8 OS=Homo sapiens OX=9606 GN=LGALS8 PE=1 SV=4	0	1	0	0	0	0	0	0	0	0	0	0	7.62605	9.77745	8.83377	7.02193	10.4943	9.09448	13.0829
sp|O00217|NDUS8_HUMAN	O00217	11.4409	10.9288	11.8667	11.4887	11.3881	12.7119	9.74042	9.72636	10.2658	9.7599	9.00799	10.3217	9.4015	9.10954	9.18394	8.90621	8.90803	10.4785	13.3677	12.149	10.8885	9.98728	1.09023	0.128306	0.238166		sp|O00217|NDUS8_HUMAN	NDUFS8	NADH dehydrogenase [ubiquinone] iron-sulfur protein 8, mitochondrial OS=Homo sapiens OX=9606 GN=NDUFS8 PE=1 SV=1	13	12	10.5129	10.4179	11.5314	10.8901	11.0212	8.79015	10.3217	9.17861	8.54233	8.79387	11.7962	8.82305	9.08312	9.35048	8.6707	8.87472	8.6876
sp|O00221|IKBE_HUMAN	O00221						7.88168	8.22034	7.78627	6.9468	7.4328						15.2976	13.9927	15.4122	10.3792	11.5688	7.64108	13.1695	1.72351	0.000199793	0.00291636		sp|O00221|IKBE_HUMAN	NFKBIE	NF-kappa-B inhibitor epsilon OS=Homo sapiens OX=9606 GN=NFKBIE PE=1 SV=3	0	2	0	0	0	0	0	0	0	0	0	0	7.3139	7.44613	7.27133	6.32739	6.60331	15.2435	13.6465
sp|O00231|PSD11_HUMAN	O00231	10.7909	9.87943	9.96992	10.297	9.34992	10.4491	10.5341	11.0153	11.7821	11.8649	10.7704	10.0446	11.0723	11.8201	10.1522	6.40053	11.6606	10.643	10.9445	10.994	10.5661	10.3227	1.02358	0.709164	0.796631		sp|O00231|PSD11_HUMAN	PSMD11	26S proteasome non-ATPase regulatory subunit 11 OS=Homo sapiens OX=9606 GN=PSMD11 PE=1 SV=3	41	38	9.91565	9.41755	9.68821	9.76055	9.04869	10.5099	10.0446	10.8098	11.0841	9.72102	9.6964	9.542	10.2868	10.7316	10.5408	6.3779	11.3721
sp|O00232|PSD12_HUMAN	O00232	9.23607	10.2985	10.3449	10.0063	9.53878	10.3701	11.5439	12.0104	12.3035	11.5013	11.2525	11.4143	10.9557	11.0633	9.88163	7.85055	10.312	9.63853	10.5837	10.2423	10.669	10.2668	1.03917	0.419056	0.553285		sp|O00232|PSD12_HUMAN	PSMD12	26S proteasome non-ATPase regulatory subunit 12 OS=Homo sapiens OX=9606 GN=PSMD12 PE=1 SV=3	47	40	8.48692	9.81701	10.0526	9.48496	9.23147	10.9804	11.4143	10.696	10.3744	9.46193	9.62303	10.4567	11.2161	11.2065	10.2178	7.82279	10.0568
sp|O00233|PSMD9_HUMAN	O00233	8.99371	9.56642	9.5815	9.72932	11.7254	8.53749	10.9616	10.0429	8.9504	10.9127	11.6805	9.86297	9.79779	11.2495	11.8643	14.7619	10.3159	11.6877	9.97808	9.52999	9.85409	10.9812	1.11438	0.0558137	0.130604		sp|O00233|PSMD9_HUMAN	PSMD9	26S proteasome non-ATPase regulatory subunit 9 OS=Homo sapiens OX=9606 GN=PSMD9 PE=1 SV=3	4	7	8.26422	9.11917	9.31076	9.22241	11.3476	11.398	9.86297	9.5655	10.549	11.3604	7.92247	9.92921	9.37868	8.15234	9.69482	14.7097	10.0606
sp|O00244|ATOX1_HUMAN	O00244	8.82745	7.08139	6.81404	7.85494	8.49065	5.05338	7.41856	9.56158	9.37638	11.7047	11.6432	10.8617	12.0662	14.8443	15.5929	11.5491	10.697	15.3484	11.1766	13.5883	8.03206	12.6106	1.57004	5.28127e-05	0.00134779	4	sp|O00244|ATOX1_HUMAN	ATOX1	Copper transport protein ATOX1 OS=Homo sapiens OX=9606 GN=ATOX1 PE=1 SV=1	12	10	8.11144	6.75032	6.6215	7.44569	8.2171	11.3616	10.8617	11.7801	13.92	14.9306	4.68935	6.71987	8.92924	8.54034	10.3985	11.5083	10.4323
sp|O00255|MEN1_HUMAN	O00255	10.2142	11.5204	9.84716	11.3677	11.6567	10.0607	7.99212	11.7573	10.5628	8.83463	10.141	10.8206	9.49316	9.95809	9.06974	11.2385	10.106	12.8661	11.5224	10.7139	10.3081	10.5432	1.02281	0.668431	0.767077		sp|O00255|MEN1_HUMAN	MEN1	Menin OS=Homo sapiens OX=9606 GN=MEN1 PE=1 SV=4	3	2	9.38567	10.9818	9.56891	10.7754	11.2812	9.89575	10.8206	9.26809	9.33804	8.68452	9.33599	7.23941	10.9797	9.62099	7.84869	11.1988	9.85595
sp|O00257|CBX4_HUMAN	O00257	12.2589	10.1834	13.0862	9.59046	10.419						7.56568	6.64733	11.3728	9.4953	13.6814						11.0297	9.42325	1.17048	0.308638	0.44717		sp|O00257|CBX4_HUMAN	CBX4	E3 SUMO-protein ligase CBX4 OS=Homo sapiens OX=9606 GN=CBX4 PE=1 SV=3	1	0	11.2646	9.70729	12.7164	9.09078	10.0833	7.38272	6.64733	11.1032	8.90407	13.1003	0	0	0	0	0	0	0
sp|O00258|WRB_HUMAN	O00258	11.0948	10.9354	11.7373	11.3299	11.2587	11.9102	14.9507	11.9269	10.8432	19.1824	9.94283	10.5947	9.73725	9.07133	8.3859	6.90936	7.37492	6.08597	9.99314	8.07741	12.3152	8.49328	1.44999	0.000239197	0.00319139	2	sp|O00258|WRB_HUMAN	WRB	Tail-anchored protein insertion receptor WRB OS=Homo sapiens OX=9606 GN=WRB PE=1 SV=2	4	2	10.1949	10.4242	11.4056	10.7396	10.896	9.70238	10.5947	9.5064	8.5065	8.02973	11.0522	13.5426	11.1381	9.87635	17.0417	6.88493	7.19243
sp|O00264|PGRC1_HUMAN	O00264	12.5119	12.1467	12.5121	13.8788	11.6694	12.6335	10.2175	8.83729	8.85193	10.8391	7.63288	6.82206	6.88869	7.77915	12.5594	12.5924	14.3681	9.06862	8.96046	9.43575	11.2921	9.30422	1.21365	0.0618877	0.14062		sp|O00264|PGRC1_HUMAN	PGRMC1	Membrane-associated progesterone receptor component 1 OS=Homo sapiens OX=9606 GN=PGRMC1 PE=1 SV=3	19	21	11.497	11.5788	12.1586	13.1557	11.2934	7.44829	6.82206	6.72537	7.29477	12.026	11.7234	9.25523	8.25285	8.06265	9.62944	12.5479	14.0126
sp|O00267|SPT5H_HUMAN	O00267	10.2349	10.208	10.9497	9.72091	9.21449	11.7167	10.3556	10.9245	10.9544	9.85661	11.3003	11.456	11.1287	10.0577	9.72603	9.37506	9.76646	11.5728	10.5148	10.9825	10.3904	10.56	1.01633	0.62896	0.736223		sp|O00267|SPT5H_HUMAN	SUPT5H	Transcription elongation factor SPT5 OS=Homo sapiens OX=9606 GN=SUPT5H PE=1 SV=1	23	13	9.4047	9.73076	10.6403	9.21444	8.91762	11.027	11.456	10.8649	9.43141	9.31294	10.8727	9.38026	10.202	9.9777	8.75662	9.34191	9.52479
sp|O00268|TAF4_HUMAN	O00268	12.2423	14.2819	11.5119	10.3179	9.20332						8.88005	9.93858	10.8654	8.11506	8.8159						11.3832	9.27403	1.22743	0.0535468	0.126502		sp|O00268|TAF4_HUMAN	TAF4	Transcription initiation factor TFIID subunit 4 OS=Homo sapiens OX=9606 GN=TAF4 PE=1 SV=2	2	0	11.2493	13.6142	11.1866	9.7803	8.90681	8.6653	9.93858	10.6078	7.60977	8.44146	0	0	0	0	0	0	0
sp|O00273|DFFA_HUMAN	O00273	10.2736	10.4997	11.0462	10.8885	10.4666	8.16286	8.51194	13.2925	12.9163	13.0336	9.23004	8.433	9.31382	12.1688	11.9289	9.93277	9.50422	12.6297	9.04768	9.11576	10.776	10.0343	1.07391	0.318371	0.457765		sp|O00273|DFFA_HUMAN	DFFA	DNA fragmentation factor subunit alpha OS=Homo sapiens OX=9606 GN=DFFA PE=1 SV=1	12	8	9.44032	10.0088	10.7341	10.3212	10.1294	9.00683	8.433	9.093	11.4111	11.4222	7.57483	7.71027	12.4134	11.7646	11.5791	9.89765	9.26904
sp|O00291|HIP1_HUMAN	O00291	10.3402	9.52839	10.2502	9.2094	15.5846	12.5312	10.0574	8.48517	7.12036	8.07654	10.0196	9.98717	9.48406	9.20318	10.4323	15.7544	11.9083	11.4142	9.79496	10.2148	9.8857	10.6919	1.08155	0.379289	0.518981		sp|O00291|HIP1_HUMAN	HIP1	Huntingtin-interacting protein 1 OS=Homo sapiens OX=9606 GN=HIP1 PE=1 SV=5	15	10	9.50146	9.08292	9.96056	8.72958	15.0825	9.77726	9.98717	9.25921	8.63014	9.98922	11.6285	9.11021	7.92401	6.48548	7.17521	15.6987	11.6136
sp|O00299|CLIC1_HUMAN	O00299	8.28052	8.56868	8.28542	9.55778	9.82539	7.8548	12.0422	10.8254	10.4287	11.9467	11.5588	11.1071	11.5472	13.141	12.1359	10.919	12.1658	9.7772	10.5953	9.49943	9.65552	11.1945	1.15939	0.0210531	0.0654039		sp|O00299|CLIC1_HUMAN	CLIC1	Chloride intracellular channel protein 1 OS=Homo sapiens OX=9606 GN=CLIC1 PE=1 SV=4	29	29	7.60887	8.16808	8.0513	9.05981	9.50884	11.2793	11.1071	11.2734	12.3228	11.6205	7.28896	10.908	10.1095	9.49879	10.6135	10.8804	11.8648
sp|O00303|EIF3F_HUMAN	O00303	10.0414	9.86402	10.4398	9.36225	9.75833	10.5003	11.4301	12.7251	13.0786	11.306	10.4081	11.0065	10.6308	11.7786	10.7779	6.09903	8.61484	10.3104	11.322	11.0946	10.7872	10.0509	1.07326	0.334166	0.472454		sp|O00303|EIF3F_HUMAN	EIF3F	Eukaryotic translation initiation factor 3 subunit F OS=Homo sapiens OX=9606 GN=EIF3F PE=1 SV=1	18	19	9.22694	9.40286	10.1448	8.87446	9.44394	10.1564	11.0065	10.3788	11.0452	10.3201	9.74391	10.3536	11.8835	11.9125	10.0443	6.07747	8.40167
sp|O00308|WWP2_HUMAN	O00308	11.7831	9.61768	10.5009	9.96932	10.4784	6.49573	7.58572	14.4469	10.4913	8.16964	9.98266	11.2221	9.74323	10.2191	10.6015	9.33415	10.8248	13.3536	11.9678	12.9187	9.72736	10.9449	1.12517	0.166112	0.288057		sp|O00308|WWP2_HUMAN	WWP2	NEDD4-like E3 ubiquitin-protein ligase WWP2 OS=Homo sapiens OX=9606 GN=WWP2 PE=1 SV=2	4	2	10.8274	9.16804	10.2042	9.4499	10.1408	9.74125	11.2221	9.51223	9.5828	10.1512	6.02779	6.87128	13.4915	9.55582	7.25792	9.30115	10.5569
sp|O00330|ODPX_HUMAN	O00330	14.0489	13.1076	12.4932	12.2356	9.61876	14.2635	10.0609	8.3633	8.77346	9.66681	7.9701	9.06387	8.7897	8.16661	8.84373	9.93357	9.73645	10.5224	12.0607	12.5246	11.067	9.65647	1.14607	0.10213	0.203164		sp|O00330|ODPX_HUMAN	PDHX	Pyruvate dehydrogenase protein X component, mitochondrial OS=Homo sapiens OX=9606 GN=PDHX PE=1 SV=3	8	11	12.9094	12.4948	12.1402	11.5981	9.30887	7.77736	9.06387	8.58131	7.65811	8.46811	13.236	9.11335	7.8102	7.99118	8.588	9.89845	9.49552
sp|O00338|ST1C2_HUMAN	O00338	10.4119	9.05118	6.45983	9.14809	8.57229	8.63327	6.81467	11.2893	12.4469	8.20294	9.41491	10.6025	12.7137	9.14991	18.5661	8.19787	7.89659	14.9687	13.1117	14.13	8.93347	11.4492	1.28161	0.0375902	0.0983736	4	sp|O00338|ST1C2_HUMAN	SULT1C2	Sulfotransferase 1C2 OS=Homo sapiens OX=9606 GN=SULT1C2 PE=1 SV=1	2	3	9.56739	8.62802	6.2773	8.67146	8.29611	9.18723	10.6025	12.4123	8.58018	17.7775	8.01135	6.17285	10.5427	11.3371	7.2875	8.16889	7.70119
sp|O00339|MATN2_HUMAN	O00339	11.6113	13.3664	10.7743	13.6435	5.95279	17.4605	12.6257	11.9041	16.8499	11.3371	7.2076	8.3839	9.09894	15.8457	8.63253	7.92842	6.09229	7.03943	8.32457	7.41924	12.1145	8.31477	1.45698	0.00695397	0.030534	2	sp|O00339|MATN2_HUMAN	MATN2	Matrilin-2 OS=Homo sapiens OX=9606 GN=MATN2 PE=1 SV=4	28	18	10.6695	12.7415	10.4699	12.9327	5.76101	7.0333	8.3839	8.88322	14.8591	8.26588	16.2027	11.4366	11.1168	15.3475	10.0719	7.90039	5.94154
sp|O00391|QSOX1_HUMAN	O00391	10.7979	11.4587	10.5037	11.1854	10.4262	7.40236	8.89118	8.19967	7.44636	8.22931	11.7594	9.4063	9.19106	10.7443	8.69458	18.2107	13.9171	11.8838	9.63213	11.1932	9.33261	11.1921	1.19924	0.0559736	0.130715		sp|O00391|QSOX1_HUMAN	QSOX1	Sulfhydryl oxidase 1 OS=Homo sapiens OX=9606 GN=QSOX1 PE=1 SV=3	3	2	9.92211	10.923	10.2069	10.6026	10.0903	11.475	9.4063	8.97316	10.0753	8.3253	6.86911	8.05379	7.65739	6.78241	7.31093	18.1463	13.5727
sp|O00399|DCTN6_HUMAN	O00399	8.91531	9.80799	11.0053	11.2379	11.0106	8.06634	8.71792	9.84074	9.6477	9.11729	9.23954	11.2775	9.55075	10.8784	11.1086	12.0786	11.1158	11.5255	12.8656	12.5681	9.68327	11.1646	1.15298	0.00894513	0.036032		sp|O00399|DCTN6_HUMAN	DCTN6	Dynactin subunit 6 OS=Homo sapiens OX=9606 GN=DCTN6 PE=1 SV=1	2	7	8.19218	9.34945	10.6943	10.6524	10.6559	9.0161	11.2775	9.32432	10.201	10.6368	7.48526	7.89685	9.18993	8.78747	8.09981	12.0359	10.8407
sp|O00400|ACATN_HUMAN	O00400	10.1466	11.9418	9.57601	10.5808	9.37969	13.6369	12.1412	13.381	13.1329	10.1411	9.81348	11.7203	11.594	10.2339	9.05278	6.65873	8.03802	8.20078	10.6523	10.6105	11.3011	9.52224	1.18681	0.0302732	0.0839023		sp|O00400|ACATN_HUMAN	SLC33A1	Acetyl-coenzyme A transporter 1 OS=Homo sapiens OX=9606 GN=SLC33A1 PE=1 SV=1	8	6	9.32355	11.3835	9.30543	10.0295	9.0775	9.57616	11.7203	11.3191	9.59671	8.66828	12.6545	10.9977	12.4961	11.9619	9.00934	6.63519	7.83912
sp|O00401|WASL_HUMAN	O00401	10.5503	9.5965	9.58377	10.6467	10.1713	4.97252	7.06567	11.2873	10.8107	11.2697	11.5216	9.09732	11.0282	11.9994	9.97343	10.0453	13.0802	13.0438	11.5615	12.4751	9.34456	11.3083	1.21015	0.0487576	0.118203	3	sp|O00401|WASL_HUMAN	WASL	Neural Wiskott-Aldrich syndrome protein OS=Homo sapiens OX=9606 GN=WASL PE=1 SV=2	5	6	9.69451	9.14785	9.31297	10.092	9.84364	11.243	9.09732	10.7667	11.2522	9.54983	4.61431	6.40021	10.5408	9.84676	10.012	10.0098	12.7565
sp|O00408|PDE2A_HUMAN	O00408	9.09979	10.2502	9.19048	11.6699	9.13114	6.3484	8.9652	10.5799	12.1891	10.9974	10.1442	10.1211	10.3433	11.6383	12.5385	6.4919	9.79678	16.3976	12.4278	11.7124	9.69988	10.8931	1.12301	0.23542	0.37048		sp|O00408|PDE2A_HUMAN	PDE2A	cGMP-dependent 3',5'-cyclic phosphodiesterase OS=Homo sapiens OX=9606 GN=PDE2A PE=1 SV=1	11	7	8.36169	9.77097	8.93079	11.0619	8.83696	9.89889	10.1211	10.0981	10.9136	12.006	5.89108	8.12084	9.88019	11.1023	9.7701	6.46895	9.55436
sp|O00410|IPO5_HUMAN	O00410	9.37688	10.1522	8.83639	10.5098	9.56839	8.13185	10.3882	10.5962	10.8318	12.3179	10.7171	9.36285	10.5983	13.2607	11.7952	10.3745	11.525	10.1254	10.8505	10.898	10.0102	10.9064	1.08952	0.0868706	0.181553		sp|O00410|IPO5_HUMAN	IPO5	Importin-5 OS=Homo sapiens OX=9606 GN=IPO5 PE=1 SV=4	41	46	8.61631	9.67755	8.58671	9.96227	9.26012	10.4579	9.36285	10.347	12.435	11.2942	7.54605	9.40979	9.89542	9.86597	10.9432	10.3378	11.2398
sp|O00411|RPOM_HUMAN	O00411	13.4625	12.9999	12.2167	11.347	12.0993	12.1813	7.67589	7.32971	8.84068	5.87749	7.94786	8.09153	7.74974	7.63583	10.7852	13.3277	11.4847	11.2794	10.766	16.46	10.0444	10.2303	1.01851	0.885963	0.925101		sp|O00411|RPOM_HUMAN	POLRMT	DNA-directed RNA polymerase, mitochondrial OS=Homo sapiens OX=9606 GN=POLRMT PE=1 SV=2	1	1	12.3705	12.3921	11.8715	10.7558	11.7095	7.75566	8.09153	7.56601	7.16038	10.3271	11.3038	6.95296	6.84497	8.05241	5.22157	13.2806	11.2005
sp|O00418|EF2K_HUMAN	O00418	9.14616	9.83025	6.30398	6.79074	10.8542	6.46012	10.2335	14.0168	12.2374	11.4929	13.6649	12.1122	11.2633	12.4248	11.5543	9.75053	12.1512	13.8716	8.013	7.75939	9.41015	11.0584	1.17516	0.158615	0.279229		sp|O00418|EF2K_HUMAN	EEF2K	Eukaryotic elongation factor 2 kinase OS=Homo sapiens OX=9606 GN=EEF2K PE=1 SV=2	1	1	8.4043	9.37067	6.12585	6.43693	10.5045	13.3344	12.1122	10.9963	11.6512	11.0636	5.99475	9.26966	13.0898	11.1463	10.2103	9.71606	11.8505
sp|O00422|SAP18_HUMAN	O00422	13.3264	13.2158	14.4295	10.9669	13.9745	15.9081	8.54774	10.4303	9.96535	8.91875	6.89979	7.41945	7.82157	8.15998	8.11949	10.2253	10.1304	10.096	10.2856	11.4123	11.7248	8.93876	1.31168	0.00594584	0.0276345	1	sp|O00422|SAP18_HUMAN	SAP18	Histone deacetylase complex subunit SAP18 OS=Homo sapiens OX=9606 GN=SAP18 PE=1 SV=1	7	5	12.2455	12.5979	14.0218	10.3955	13.5243	6.73293	7.41945	7.63613	7.65189	7.77463	14.7621	7.7427	9.74055	9.0768	7.92343	10.1891	9.87974
sp|O00423|EMAL1_HUMAN	O00423	10.2694	8.43762	12.1272	8.66449	12.9962	14.0286	10.5546	9.62009	9.60202	10.7033	11.5277	9.78517	11.1673	9.06344	9.93162	10.2622	10.0348	9.60449	10.9486	10.717	10.5648	10.2783	1.02787	0.635568	0.741561		sp|O00423|EMAL1_HUMAN	EML1	Echinoderm microtubule-associated protein-like 1 OS=Homo sapiens OX=9606 GN=EML1 PE=1 SV=3	11	19	9.43641	8.04315	11.7845	8.21306	12.5775	11.2489	9.78517	10.9025	8.4991	9.50979	13.018	9.56055	8.98388	8.74586	9.50879	10.2259	9.78645
sp|O00425|IF2B3_HUMAN	O00425	11.6112	11.4046	13.0495	10.5206	10.507	14.5353	10.0065	12.7342	12.5623	10.1468	8.66229	11.4844	9.96844	10.5143	6.37955	6.38048	6.02285	12.4492	10.5264	11.0362	11.6256	9.05281	1.2842	0.0162604	0.0546202	2	sp|O00425|IF2B3_HUMAN	IGF2BP3	Insulin-like growth factor 2 mRNA-binding protein 3 OS=Homo sapiens OX=9606 GN=IGF2BP3 PE=1 SV=2	27	20	10.6694	10.8714	12.6808	9.97248	10.1685	8.45281	11.4844	9.7321	9.85965	6.10859	13.4882	9.0641	11.892	11.4422	9.01441	6.35792	5.87382
sp|O00429|DNM1L_HUMAN	O00429	10.1639	10.1436	10.4726	10.4821	9.41384	8.94993	9.80212	9.69789	9.26397	12.1262	10.5189	10.7862	9.84227	10.6588	11.6061	9.85834	12.5262	10.2805	11.6608	11.7536	10.0181	10.9166	1.08968	0.0331161	0.0899194		sp|O00429|DNM1L_HUMAN	DNM1L	Dynamin-1-like protein OS=Homo sapiens OX=9606 GN=DNM1L PE=1 SV=2	19	22	9.33951	9.6694	10.1767	9.93593	9.11055	10.2645	10.7862	9.60893	9.99508	11.1132	8.3052	8.87894	9.05653	8.43795	10.7729	9.82349	12.2162
sp|O00442|RTCA_HUMAN	O00442	8.71716	9.7159	9.48705	9.62874	9.14367	8.81831	9.98175	10.0746	10.1085	10.3378	11.4741	12.7845	11.8267	11.8643	9.27403	11.1881	12.0085	11.2974	11.0255	10.9348	9.58652	11.3324	1.18211	6.86851e-05	0.00153582		sp|O00442|RTCA_HUMAN	RTCA	RNA 3'-terminal phosphate cyclase OS=Homo sapiens OX=9606 GN=RTCA PE=1 SV=1	10	13	8.0101	9.26167	9.21898	9.12707	8.84909	11.1966	12.7845	11.5463	11.1256	8.88013	8.18306	9.04165	9.40831	9.20715	9.1841	11.1485	11.7114
sp|O00443|P3C2A_HUMAN	O00443	10.374	11.0142	10.8677	10.8338	9.69053	10.6872	10.4612	12.0487	11.7897	9.61941	9.6068	11.8622	9.97424	10.3286	9.50373	8.44478	8.76647	11.1054	11.5137	11.678	10.7132	10.212	1.04909	0.297225	0.434691		sp|O00443|P3C2A_HUMAN	PIK3C2A	Phosphatidylinositol 4-phosphate 3-kinase C2 domain-containing subunit alpha OS=Homo sapiens OX=9606 GN=PIK3C2A PE=1 SV=2	16	16	9.53255	10.4993	10.5606	10.2693	9.37833	9.37448	11.8622	9.73777	9.68545	9.10008	9.91733	9.47591	11.2519	10.7385	8.54589	8.41492	8.54955
sp|O00459|P85B_HUMAN	O00459	11.6714	10.5133	9.85634	9.62564	8.83308	9.59894	7.77729	7.74262	7.26362	5.40427	10.3952	11.4891	10.0417	10.3742	11.3189	19.3111	17.0068	11.8604	9.05828	9.66454	8.6456	11.6989	1.35316	0.00994686	0.0386343	3	sp|O00459|P85B_HUMAN	PIK3R2	Phosphatidylinositol 3-kinase regulatory subunit beta OS=Homo sapiens OX=9606 GN=PIK3R2 PE=1 SV=2	3	2	10.7247	10.0218	9.57784	9.12413	8.5485	10.1438	11.4891	9.80367	9.7282	10.8382	8.90745	7.04481	7.23057	6.61596	4.80116	19.2428	16.586
sp|O00461|GOLI4_HUMAN	O00461	10.501	11.1984	10.7759	9.39546	11.7132	15.7093	14.2475	10.3684	10.4616	10.2657	12.4673	10.7504	11.448	8.04289	7.65292	9.05635	9.20048	9.39361	9.28003	8.44143	11.3267	9.46832	1.19627	0.0203314	0.0637871		sp|O00461|GOLI4_HUMAN	GOLIM4	Golgi integral membrane protein 4 OS=Homo sapiens OX=9606 GN=GOLIM4 PE=1 SV=1	6	6	9.64923	10.6749	10.4714	8.90594	11.3358	12.1658	10.7504	11.1766	7.54209	7.32788	14.5776	12.9056	9.6827	9.52882	9.1201	9.02433	8.97282
sp|O00462|MANBA_HUMAN	O00462	10.0611	11.7627	10.0419	11.0898	12.1799	12.4805	13.2554	11.805	12.2118	11.429	10.0234	9.70186	9.63583	10.1823	9.44725	8.03915	8.17399	8.45528	10.7965	9.9156	11.5905	9.39568	1.2336	0.000100182	0.00194358	2	sp|O00462|MANBA_HUMAN	MANBA	Beta-mannosidase OS=Homo sapiens OX=9606 GN=MANBA PE=1 SV=3	32	37	9.24504	11.2128	9.75816	10.512	11.7875	9.78096	9.70186	9.40738	9.54829	9.046	11.5814	12.007	11.0243	11.1229	10.1535	8.01073	7.97173
sp|O00463|TRAF5_HUMAN	O00463	7.2599	10.1812	10.7745	10.1237	8.88524	6.29442	7.33138	6.18962	6.04359	5.62031	10.6844	11.6778	8.8981	11.4198	14.0557	24.8242	19.8108	9.78686	8.46786	9.88722	7.65949	12.1792	1.59008	0.00313999	0.0177676	3	sp|O00463|TRAF5_HUMAN	TRAF5	TNF receptor-associated factor 5 OS=Homo sapiens OX=9606 GN=TRAF5 PE=1 SV=2	3	2	6.67104	9.70523	10.4701	9.59627	8.59898	10.426	11.6778	8.68714	10.7087	13.4587	5.84098	6.6409	5.78028	5.50472	4.99309	24.7364	19.3206
sp|O00468|AGRIN_HUMAN	O00468	11.2609	12.6957	12.148	10.8419	8.18029	14.7112	11.7543	14.1549	15.1122	10.6367	9.82728	10.4998	12.4658	9.90322	6.27185	8.4749	6.81353	7.04608	9.04075	8.98962	11.9743	8.75368	1.36791	0.00239729	0.0148102	1	sp|O00468|AGRIN_HUMAN	AGRN	Agrin OS=Homo sapiens OX=9606 GN=AGRN PE=1 SV=6	64	58	10.3475	12.1022	11.8047	10.277	7.91674	9.58963	10.4998	12.1703	9.28659	6.00547	13.6514	10.6473	13.2188	13.7647	9.44963	8.44494	6.64493
sp|O00469|PLOD2_HUMAN	O00469	10.1087	13.4203	10.2677	13.0479	14.7446	14.7424	13.1933	8.78027	10.3506	11.5497	8.6195	6.48006	7.00622	10.4083	10.2469	10.3187	12.0444	8.10822	9.18698	8.04035	11.8524	8.89672	1.33222	0.00285289	0.0166	2	sp|O00469|PLOD2_HUMAN	PLOD2	Procollagen-lysine,2-oxoglutarate 5-dioxygenase 2 OS=Homo sapiens OX=9606 GN=PLOD2 PE=1 SV=2	45	40	9.28878	12.7929	9.97756	12.3681	14.2696	8.41105	6.48006	6.84011	9.76018	9.81169	13.6804	11.9507	8.1996	9.42771	10.2608	10.2822	11.7464
sp|O00471|EXOC5_HUMAN	O00471	10.5684	10.3738	11.439	10.6027	10.9468	9.70769	11.5344	11.4859	11.8692	10.2165	9.55735	10.4868	9.41387	10.3707	10.3507	9.07865	10.3352	10.5563	10.424	10.9256	10.8544	10.1341	1.07107	0.0229914	0.0693571		sp|O00471|EXOC5_HUMAN	EXOC5	Exocyst complex component 5 OS=Homo sapiens OX=9606 GN=EXOC5 PE=1 SV=1	11	12	9.71119	9.88882	11.1158	10.0503	10.5941	9.32622	10.4868	9.19068	9.72498	9.9111	9.00837	10.4481	10.7263	10.8109	9.07636	9.04655	10.0795
sp|O00478|BT3A3_HUMAN	O00478	10.5436	9.59643	9.91058	10.8799	12.6896	10.7097	11.3839	8.5294	8.39169	13.8351	11.0531	8.39822	10.5501	9.29403	11.2166	12.1302	14.757	8.3663	8.7781	9.14311	10.5271	10.2068	1.03138	0.693489	0.784236		sp|O00478|BT3A3_HUMAN	BTN3A3	Butyrophilin subfamily 3 member A3 OS=Homo sapiens OX=9606 GN=BTN3A3 PE=1 SV=1	6	3	9.6884	9.14778	9.63054	10.313	12.2808	10.7858	8.39822	10.3	8.71533	10.7402	9.93817	10.3117	7.96532	7.64345	12.2911	12.0873	14.3918
sp|O00483|NDUA4_HUMAN	O00483	10.0642	11.7402	12.0878	11.4004	7.74906	17.2812	12.9803	15.1662	15.5089	10.5458	9.07412	13.0441	10.7954	9.38512	8.63654	3.67065	5.38213	10.9876	7.50447	8.0079	12.1517	8.18593	1.48446	0.0103429	0.039706	2	sp|O00483|NDUA4_HUMAN	NDUFA4	Cytochrome c oxidase subunit NDUFA4 OS=Homo sapiens OX=9606 GN=NDUFA4 PE=1 SV=1	8	5	9.24786	11.1913	11.7462	10.8064	7.49941	8.85468	13.0441	10.5395	8.80075	8.26972	16.0363	11.7578	14.1632	14.1261	9.36891	3.65767	5.24895
sp|O00487|PSDE_HUMAN	O00487	11.2741	10.6119	10.7677	10.7843	9.81415	10.0733	9.48616	9.64058	9.79868	10.0488	9.54923	10.4031	10.0174	11.8786	9.0865	8.15799	12.4118	14.0943	10.2343	11.8358	10.2148	10.6384	1.04147	0.461895	0.593363		sp|O00487|PSDE_HUMAN	PSMD14	26S proteasome non-ATPase regulatory subunit 14 OS=Homo sapiens OX=9606 GN=PSMD14 PE=1 SV=1	18	20	10.3596	10.1158	10.4634	10.2224	9.49796	9.3183	10.4031	9.77986	11.139	8.70057	9.34766	8.59274	9.00301	8.92499	8.92738	8.12915	12.1047
sp|O00499|BIN1_HUMAN	O00499	10.0494	9.51607	9.25037	11.0903	8.768	7.67141	11.014	11.0649	10.7093	11.5013	11.0804	11.6883	11.5468	10.2881	10.7427	9.31565	11.2477	11.0595	11.3687	11.0776	9.99051	10.9204	1.09308	0.068805	0.152688		sp|O00499|BIN1_HUMAN	BIN1	Myc box-dependent-interacting protein 1 OS=Homo sapiens OX=9606 GN=BIN1 PE=1 SV=1	16	17	9.23425	9.07118	8.98899	10.5125	8.48552	10.8124	11.6883	11.273	9.64747	10.2864	7.11878	9.97666	10.3331	9.75441	10.2178	9.28271	10.9694
sp|O00505|IMA4_HUMAN	O00505	9.0373	10.3316	10.2888	10.8078	11.0982	11.0177	12.0703	11.4829	9.58072	12.2713	11.5337	9.82237	10.895	10.3825	9.83143	11.1409	12.0962	8.06329	9.55439	8.90981	10.754	10.1543	1.05906	0.262227	0.398688		sp|O00505|IMA4_HUMAN	KPNA3	Importin subunit alpha-4 OS=Homo sapiens OX=9606 GN=KPNA3 PE=1 SV=2	5	2	8.30427	9.84858	9.99809	10.2447	10.7406	11.2548	9.82237	10.6367	9.73599	9.41386	10.224	10.9335	10.7235	8.72646	10.9018	11.1015	11.7969
sp|O00506|STK25_HUMAN	O00506	9.02585	9.77617	9.64425	9.66366	8.11073	6.31263	8.12422	10.2418	8.72616	8.3966	10.7661	11.5479	11.4372	12.2157	11.8338	10.7284	9.59759	16.9308	13.1283	13.1264	8.72855	11.9968	1.37443	0.000133599	0.00228972	3	sp|O00506|STK25_HUMAN	STK25	Serine/threonine-protein kinase 25 OS=Homo sapiens OX=9606 GN=STK25 PE=1 SV=1	2	2	8.29375	9.31912	9.37174	9.16017	7.84942	10.5057	11.5479	11.166	11.4551	11.3312	5.85788	7.35907	9.56449	7.9481	7.45955	10.6905	9.3601
sp|O00519|FAAH1_HUMAN	O00519	11.5352	11.281	10.9458	10.3641	7.40606	10.9494	10.1965	13.0799	14.7503	7.8037	9.73197	12.8014	10.6402	10.9488	8.42345	7.60126	7.27775	11.5608	10.6324	12.3435	10.6274	10.0258	1.06001	0.526937	0.651068		sp|O00519|FAAH1_HUMAN	FAAH	Fatty-acid amide hydrolase 1 OS=Homo sapiens OX=9606 GN=FAAH PE=1 SV=2	9	10	10.5996	10.7536	10.6365	9.82414	7.16746	9.49662	12.8014	10.3879	10.2671	8.06568	10.1606	9.23617	12.2149	13.4351	6.93281	7.57439	7.09766
sp|O00522|KRIT1_HUMAN	O00522	9.39573	10.7677	11.5985	9.8498	9.97797	7.91587	10.7376	9.69685	10.6555	9.57314	10.3423	11.3083	10.2856	11.4295	9.06307	10.6291	11.6174	9.93121	12.9361	12.1251	9.96917	10.9135	1.09472	0.0679443	0.151478		sp|O00522|KRIT1_HUMAN	KRIT1	Krev interaction trapped protein 1 OS=Homo sapiens OX=9606 GN=KRIT1 PE=1 SV=2	1	1	8.63363	10.2643	11.2708	9.33661	9.65651	10.0922	11.3083	10.0417	10.7178	8.67813	7.34563	9.72634	9.05556	9.70539	8.50479	10.5915	11.3299
sp|O00533|NCHL1_HUMAN	O00533						8.80674	5.28701	6.25297	4.73455	5.44822						33.3749	12.7126	8.64507	9.22538	9.47612	5.95839	12.6243	2.11874	0.027253	0.0781226		sp|O00533|NCHL1_HUMAN	CHL1	Neural cell adhesion molecule L1-like protein OS=Homo sapiens OX=9606 GN=CHL1 PE=1 SV=4	0	1	0	0	0	0	0	0	0	0	0	0	8.17232	4.78907	5.83944	4.3124	4.8402	33.2569	12.398
sp|O00534|VMA5A_HUMAN	O00534	8.73521	9.37742	9.10072	9.03466	9.12788	6.66328	9.22696	10.1424	10.976	7.92068	11.0066	11.9923	11.1262	13.1883	11.3112	9.00831	10.0295	13.4305	14.0968	14.1155	8.95944	11.8125	1.31845	0.000393513	0.00433719	4	sp|O00534|VMA5A_HUMAN	VWA5A	von Willebrand factor A domain-containing protein 5A OS=Homo sapiens OX=9606 GN=VWA5A PE=2 SV=2	14	20	8.02668	8.93901	8.84357	8.56394	8.8338	10.7404	11.9923	10.8624	12.3671	10.8308	6.18327	8.35795	9.47169	9.99734	7.03674	8.97646	9.78137
sp|O00541|PESC_HUMAN	O00541	10.9745	11.3417	11.3233	10.6342	10.7294	12.4601	9.11122	11.914	12.7372	10.4031	9.92944	9.61189	10.1915	10.59	8.83026	10.5078	8.49036	11.389	8.9155	10.1784	11.1166	9.82559	1.13139	0.00925534	0.036794		sp|O00541|PESC_HUMAN	PES1	Pescadillo homolog OS=Homo sapiens OX=9606 GN=PES1 PE=1 SV=1	4	2	10.0843	10.8115	11.0033	10.0801	10.3837	9.68932	9.61189	9.94988	9.93065	8.45521	11.5625	8.25311	11.1261	11.6015	9.24213	10.4706	8.28027
sp|O00559|RCAS1_HUMAN	O00559	11.2707	11.8322	10.8481	12.0118	12.0287	9.38356	7.28889	8.56139	8.65769	8.06398	9.33925	10.1445	8.81343	8.73096	9.13382	18.2376	12.8933	12.1493	9.64592	10.1663	9.84402	10.6434	1.0812	0.413876	0.549008		sp|O00559|RCAS1_HUMAN	EBAG9	Receptor-binding cancer antigen expressed on SiSo cells OS=Homo sapiens OX=9606 GN=EBAG9 PE=1 SV=1	2	4	10.3565	11.279	10.5416	11.386	11.6412	9.1134	10.1445	8.60448	8.18732	8.74588	8.70759	6.60241	7.99519	7.88573	7.16405	18.1731	12.5743
sp|O00560|SDCB1_HUMAN	O00560	11.4146	9.31194	9.01876	8.93956	6.23459	10.7759	8.68903	16.8204	19.4056	7.59521	9.37489	14.749	14.2848	11.2198	9.39807	4.49104	6.43377	10.9341	9.94841	11.4775	10.2176	9.71812	1.0514	0.756492	0.834148		sp|O00560|SDCB1_HUMAN	SDCBP	Syntenin-1 OS=Homo sapiens OX=9606 GN=SDCBP PE=1 SV=1	34	30	10.4887	8.87659	8.76392	8.4738	6.03373	9.14818	14.749	13.9461	10.5212	8.99891	9.99962	7.87068	15.708	17.6753	6.74759	4.47516	6.27457
sp|O00562|PITM1_HUMAN	O00562	9.97961	10.6864	10.8311	10.5478	11.2841	10.8996	10.4006	10.9446	9.6415	9.33187	10.3964	9.65114	9.10788	9.69942	11.9221	12.7113	10.2817	10.5688	10.508	10.4884	10.4377	10.4869	1.00472	0.896331	0.931356		sp|O00562|PITM1_HUMAN	PITPNM1	Membrane-associated phosphatidylinositol transfer protein 1 OS=Homo sapiens OX=9606 GN=PITPNM1 PE=1 SV=4	6	7	9.17015	10.1868	10.5251	9.99821	10.9206	10.145	9.65114	8.89195	9.09548	11.4157	10.1144	9.42108	10.2208	8.78182	8.29044	12.6664	10.0273
sp|O00566|MPP10_HUMAN	O00566	12.3572	12.2716	13.4586	11.369	11.8796	17.2568	11.3238	9.09908	10.16	11.2173	8.67468	9.45387	8.32044	9.37549	7.06165	7.60307	10.1015	10.2936	9.79941	9.50132	11.877	8.95744	1.32594	0.000513985	0.00513647	1	sp|O00566|MPP10_HUMAN	MPHOSPH10	U3 small nucleolar ribonucleoprotein protein MPP10 OS=Homo sapiens OX=9606 GN=MPHOSPH10 PE=1 SV=2	6	3	11.3549	11.6979	13.0783	10.7767	11.4969	8.4649	9.45387	8.12318	8.79172	6.76172	16.0137	10.2573	8.49732	9.25408	9.96546	7.57619	9.85158
sp|O00567|NOP56_HUMAN	O00567	13.5683	13.3745	12.1879	12.0975	12.291	15.983	11.7717	10.9734	10.7811	11.4437	8.70227	6.7516	7.99917	8.7321	8.70573	9.10891	9.75101	8.83896	8.66262	9.10111	12.3683	8.59937	1.43827	5.88902e-07	0.000104562	1	sp|O00567|NOP56_HUMAN	NOP56	Nucleolar protein 56 OS=Homo sapiens OX=9606 GN=NOP56 PE=1 SV=4	29	23	12.4678	12.7492	11.8435	11.4672	11.895	8.49182	6.7516	7.80952	8.18839	8.33597	14.8316	10.663	10.2477	9.81983	10.1666	9.07671	9.50972
sp|O00571|DDX3X_HUMAN	O00571	10.8111	11.5679	9.71795	9.33583	12.177	10.5034	9.30562	13.8881	13.1476	12.0009	8.75069	9.74675	9.48329	12.245	10.3751	7.34976	9.68873	11.8453	9.75136	8.85629	11.1459	9.71452	1.14735	0.0466927	0.114499		sp|O00571|DDX3X_HUMAN	DDX3X	ATP-dependent RNA helicase DDX3X OS=Homo sapiens OX=9606 GN=DDX3X PE=1 SV=3	31	31	9.93415	11.0271	9.44336	8.84942	11.7847	8.53907	9.74675	9.25846	11.4826	9.9344	9.74678	8.4292	12.9696	11.9753	10.6616	7.32377	9.44898
sp|O00584|RNT2_HUMAN	O00584	9.06891	9.53695	9.72793	10.5935	8.83755	8.53569	9.80112	9.49556	10.3035	9.2733	12.5352	11.7259	11.4809	9.95036	10.4756	9.27092	10.1568	12.9778	12.9089	13.0217	9.49863	11.3708	1.1971	0.000818949	0.00702946		sp|O00584|RNT2_HUMAN	RNASET2	Ribonuclease T2 OS=Homo sapiens OX=9606 GN=RNASET2 PE=1 SV=2	16	21	8.33332	9.09108	9.45305	10.0416	8.55283	12.2321	11.7259	11.2087	9.33079	10.0307	7.9208	8.87803	8.86758	9.38475	8.23841	9.23814	9.90551
sp|O00592|PODXL_HUMAN	O00592	13.7192	10.7095	13.9102	9.8188	18.6359	17.0214	7.52972	12.156	11.9263	9.37894	5.62306	10.3106	6.47892	7.57327	7.41525	9.07804	4.94075	10.5373	11.4923	12.1424	12.0616	8.20994	1.46915	0.00888469	0.0359788	1	sp|O00592|PODXL_HUMAN	PODXL	Podocalyxin OS=Homo sapiens OX=9606 GN=PODXL PE=1 SV=2	10	11	12.6064	10.2088	13.5171	9.30723	18.0355	5.48708	10.3106	6.32532	7.10171	7.1003	15.7952	6.82056	11.3521	10.8629	8.33226	9.04594	4.81849
sp|O00622|CCN1_HUMAN	O00622						9.77963	14.5056	9.33393	10.718	13.6763						9.60251	13.9731	6.31966	10.9583	7.59364	11.4183	9.32637	1.2243	0.255809	0.391829		sp|O00622|CCN1_HUMAN	CCN1	CCN family member 1 OS=Homo sapiens OX=9606 GN=CCN1 PE=1 SV=1	0	1	0	0	0	0	0	0	0	0	0	0	9.07513	13.1394	8.71664	9.7623	12.15	9.56856	13.6273
sp|O00623|PEX12_HUMAN	O00623	12.5752	11.7198	12.0982	13.3119	12.2472						6.43575	9.44209	7.66859	9.55157	9.27366						12.379	8.37803	1.47756	0.00115953	0.00897074		sp|O00623|PEX12_HUMAN	PEX12	Peroxisome assembly protein 12 OS=Homo sapiens OX=9606 GN=PEX12 PE=1 SV=1	1	0	11.5552	11.1719	11.7563	12.6183	11.8526	6.28011	9.44209	7.48678	8.95683	8.87978	0	0	0	0	0	0	0
sp|O00625|PIR_HUMAN	O00625	10.0649	9.22883	9.5546	9.54668	8.01089	6.15131	6.97147	9.30817	9.47686	6.98602	10.1931	13.8459	11.2034	11.6287	10.6865	8.19496	12.6691	15.4041	14.6238	15.4584	8.42122	12.166	1.44469	0.000385191	0.00428899	3	sp|O00625|PIR_HUMAN	PIR	Pirin OS=Homo sapiens OX=9606 GN=PIR PE=1 SV=1	12	26	9.24853	8.79737	9.28462	9.04928	7.7528	9.94656	13.8459	10.9378	10.9046	10.2326	5.70818	6.31488	8.69258	8.63186	6.20639	8.16599	12.3556
sp|O00628|PEX7_HUMAN	O00628	7.51615	8.52536	9.86009	5.17503	5.25852	9.24681	10.0339	11.9706	13.7721	11.1083	14.0869	11.4777	15.9867	15.6061	10.3649	6.87435	7.83552	10.2792	12.4142	12.8177	8.84216	11.3927	1.28846	0.0769871	0.165439		sp|O00628|PEX7_HUMAN	PEX7	Peroxisomal targeting signal 2 receptor OS=Homo sapiens OX=9606 GN=PEX7 PE=1 SV=1	1	1	6.9065	8.12679	9.58148	4.9054	5.0891	13.7462	11.4777	15.6077	14.6344	9.92471	8.58069	9.08885	11.1789	12.5441	9.86859	6.85005	7.64163
sp|O00629|IMA3_HUMAN	O00629	9.56006	10.1328	9.32341	9.95904	9.82362	10.7239	10.4424	10.0942	9.6743	9.78764	11.3175	11.3293	11.5438	10.7842	10.2276	10.2687	11.4874	10.8195	11.1935	11.3663	9.94437	11.024	1.10857	4.40737e-05	0.00119525		sp|O00629|IMA3_HUMAN	KPNA4	Importin subunit alpha-3 OS=Homo sapiens OX=9606 GN=KPNA4 PE=1 SV=1	18	15	8.78463	9.65904	9.05996	9.44016	9.50713	11.0438	11.3293	11.2701	10.1127	9.79323	9.95137	9.4589	9.4266	8.8117	8.69535	10.2324	11.2031
sp|O00712|NFIB_HUMAN	O00712	10.4469	10.9442	11.6056	10.7331	10.8773	7.84298	9.33108	8.65106	7.49513	10.5975	13.2616	8.71989	11.7266	7.74755	7.95264	13.7756	11.5	11.8728	12.3191	12.0712	9.75339	10.8859	1.11612	0.195841	0.324663		sp|O00712|NFIB_HUMAN	NFIB	Nuclear factor 1 B-type OS=Homo sapiens OX=9606 GN=NFIB PE=1 SV=2	2	3	9.59955	10.4325	11.2777	10.1739	10.5269	12.9409	8.71989	11.4486	7.26514	7.61487	7.27799	8.45226	8.07893	6.82683	9.41487	13.7269	11.2154
sp|O00743|PPP6_HUMAN	O00743	8.5666	8.55007	8.82528	8.78422	8.28876	8.64101	14.9531	11.477	12.455	11.5793	14.3083	14.2326	13.281	9.7036	9.18338	9.13291	8.65112	9.69256	10.3144	9.56738	10.0066	10.6179	1.06109	0.519841	0.64482		sp|O00743|PPP6_HUMAN	PPP6C	Serine/threonine-protein phosphatase 6 catalytic subunit OS=Homo sapiens OX=9606 GN=PPP6C PE=1 SV=1	9	7	7.87175	8.15034	8.57591	8.32655	8.02172	13.9623	14.2326	12.9661	9.0994	8.79333	8.01853	13.5448	10.718	11.3445	10.2871	9.10062	8.43705
sp|O00748|EST2_HUMAN	O00748	11.7431	10.5902	11.1298	11.7187	10.4072	12.9024	9.07413	12.0372	13.3473	10.225	9.29033	10.628	9.49255	9.72535	9.43903	6.69222	7.40073	12.9235	11.4875	10.1874	11.2498	9.5702	1.1755	0.0353941	0.0943471		sp|O00748|EST2_HUMAN	CES2	Cocaine esterase OS=Homo sapiens OX=9606 GN=CES2 PE=1 SV=1	3	2	10.7906	10.0951	10.8153	11.1081	10.0719	9.06566	10.628	9.2675	9.11979	9.03813	11.9729	8.21951	11.2411	12.1572	9.08394	6.66856	7.2176
sp|O00754|MA2B1_HUMAN	O00754	11.5319	12.3694	11.3928	11.8766	8.73224	11.6364	12.1519	11.9829	11.7552	10.2765	9.29286	10.2822	9.68986	10.0784	8.95172	8.25759	8.79426	9.29715	10.9242	11.2566	11.3183	9.64062	1.17402	0.00226667	0.0141994		sp|O00754|MA2B1_HUMAN	MAN2B1	Lysosomal alpha-mannosidase OS=Homo sapiens OX=9606 GN=MAN2B1 PE=1 SV=3	31	31	10.5965	11.7911	11.0709	11.2578	8.45091	9.06813	10.2822	9.46013	9.45083	8.57151	10.7981	11.0074	11.1904	10.7071	9.12963	8.2284	8.57665
sp|O00757|F16P2_HUMAN	O00757	7.41629	9.06577	8.45251	10.7371	7.08552	7.38656	13.2935	9.81394	9.80175	8.69623	13.393	10.646	10.0733	7.75704	19.2903	9.29191	9.72986	16.8285	10.6141	10.2886	9.01653	11.3573	1.25961	0.0462519	0.113613	4	sp|O00757|F16P2_HUMAN	FBP2	Fructose-1,6-bisphosphatase isozyme 2 OS=Homo sapiens OX=9606 GN=FBP2 PE=1 SV=2	1	7	6.81474	8.64193	8.21367	10.1777	6.85724	13.0691	10.646	9.83448	7.27404	18.471	6.85445	12.0415	9.16491	8.92778	7.72574	9.25906	9.4891
sp|O00763|ACACB_HUMAN	O00763	9.49474	10.4001	9.52709	10.0448	8.63516	9.04027	11.8843	10.5086	10.3823	16.5367	10.7188	11.5331	11.5915	11.0039	11.0672	8.39924	9.03356	9.69841	10.848	10.2352	10.4692	10.3611	1.01043	0.87487	0.918976		sp|O00763|ACACB_HUMAN	ACACB	Acetyl-CoA carboxylase 2 OS=Homo sapiens OX=9606 GN=ACACB PE=1 SV=3	3	8	8.72461	9.91391	9.25789	9.52142	8.35696	10.4596	11.5331	11.3167	10.3187	10.5971	8.38903	10.765	9.81363	9.45657	14.6912	8.36954	8.81003
sp|O00764|PDXK_HUMAN	O00764	11.2817	9.47214	8.54844	11.0222	10.7456	8.04029	10.7532	10.6026	10.0405	14.7625	10.8232	9.3279	9.73452	11.1659	12.1001	9.06594	11.9285	10.683	9.73274	10.6148	10.3928	10.4712	1.00754	0.908494	0.93901		sp|O00764|PDXK_HUMAN	PDXK	Pyridoxal kinase OS=Homo sapiens OX=9606 GN=PDXK PE=1 SV=1	29	21	10.3666	9.0293	8.30689	10.4479	10.3994	10.5615	9.3279	9.50373	10.4706	11.5862	7.46109	9.74043	9.90137	9.1452	13.115	9.03389	11.6333
sp|O00767|ACOD_HUMAN	O00767	9.51029	9.98168	12.1287	11.4844	6.43561	17.351	11.7305	7.45066	7.74072	29.5695	11.8651	10.71	14.2116	9.27157	8.3431	6.91792	5.2329	8.04865	7.1564	6.52276	11.1439	8.46984	1.31571	0.125004	0.234151		sp|O00767|ACOD_HUMAN	SCD	Acyl-CoA desaturase OS=Homo sapiens OX=9606 GN=SCD PE=1 SV=2	15	11	8.7389	9.51502	11.786	10.886	6.22827	11.5782	10.71	13.8747	8.69427	7.98874	16.1011	10.6257	6.95792	7.05052	26.2696	6.89346	5.10341
sp|O14494|PLPP1_HUMAN	O14494	8.04386	9.34436	8.22851	9.07587	17.4321	15.5152	20.8388	14.223	11.2561	15.8093	10.7758	8.03309	10.5508	9.1047	13.4146	5.23177	6.12507	5.46314	6.3803	6.77685	12.3126	7.81004	1.57651	0.00663146	0.0297481	2	sp|O14494|PLPP1_HUMAN	PLPP1	Phospholipid phosphatase 1 OS=Homo sapiens OX=9606 GN=PLPP1 PE=1 SV=1	3	1	7.39141	8.9075	7.996	8.603	16.8705	10.5152	8.03309	10.3007	8.53779	12.8448	14.3975	18.8762	13.2824	10.2525	14.045	5.21327	5.97351
sp|O14495|PLPP3_HUMAN	O14495	9.77837	7.37743	8.76263	10.7356	18.6463	11.5491	14.4655	9.91653	9.51312	15.0121	8.96598	5.73819	11.119	6.87428	16.1419	8.12223	21.2093	4.95396	6.43976	5.3396	11.1589	8.45309	1.3201	0.139555	0.252876		sp|O14495|PLPP3_HUMAN	PLPP3	Phospholipid phosphatase 3 OS=Homo sapiens OX=9606 GN=PLPP3 PE=1 SV=1	4	6	8.98523	7.03252	8.51503	10.1763	18.0456	8.74916	5.73819	10.8554	6.44625	15.4563	10.7171	13.1031	9.26071	8.66489	13.3368	8.09351	20.6845
sp|O14497|ARI1A_HUMAN	O14497	11.3895	11.7219	11.8117	10.2866	10.5089	9.07118	7.61196	11.2396	10.2973	9.25423	9.03168	11.4342	10.3767	9.2561	8.25424	12.149	10.5617	13.4841	10.4294	11.446	10.2344	10.5394	1.0298	0.650436	0.75359		sp|O14497|ARI1A_HUMAN	ARID1A	AT-rich interactive domain-containing protein 1A OS=Homo sapiens OX=9606 GN=ARID1A PE=1 SV=3	8	4	10.4657	11.1739	11.4779	9.75062	10.1703	8.81327	11.4342	10.1307	8.67976	7.90366	8.41771	6.89505	10.4963	9.37912	8.22147	12.106	10.3004
sp|O14498|ISLR_HUMAN	O14498	7.09381	8.04837	6.24504	14.8725	11.0251	8.38886	13.2498	9.57222	9.3869	13.7026	15.7155	8.55238	13.1716	9.96871	9.27207	11.9561	15.9906	8.19734	8.0724	7.58984	9.77944	10.4622	1.06982	0.605403	0.717595		sp|O14498|ISLR_HUMAN	ISLR	Immunoglobulin superfamily containing leucine-rich repeat protein OS=Homo sapiens OX=9606 GN=ISLR PE=2 SV=1	4	6	6.51842	7.6721	6.06858	14.0976	10.6699	15.3355	8.55238	12.8593	9.348	8.87826	7.78455	12.0019	8.93917	8.54992	12.1734	11.9138	15.5949
sp|O14521|DHSD_HUMAN	O14521	11.545	11.3762	10.8941	11.2545	12.402	23.1626	11.5735	8.61122	10.14	9.42148	9.47861	10.245	8.87361	7.31609	10.7276	4.70213	8.65936	9.30831	12.1342	8.87042	11.5981	8.79174	1.31921	0.0298166	0.0831213	2	sp|O14521|DHSD_HUMAN	SDHD	Succinate dehydrogenase [ubiquinone] cytochrome b small subunit, mitochondrial OS=Homo sapiens OX=9606 GN=SDHD PE=1 SV=1	2	1	10.6086	10.8443	10.5863	10.6681	12.0024	9.24939	10.245	8.66323	6.86055	10.272	21.494	10.4835	8.04173	9.23589	8.37005	4.68551	8.44509
sp|O14522|PTPRT_HUMAN	O14522	2.58807	11.2636	2.3279	9.09195	10.9023	8.90631	26.7276	5.63059	6.43958	17.6183	14.3125	4.32529	9.36311	36.074	4.37883	11.1114	10.9386	7.0216	5.6915	6.96179	7.96128	8.89368	1.11712	0.747823	0.827348		sp|O14522|PTPRT_HUMAN	PTPRT	Receptor-type tyrosine-protein phosphatase T OS=Homo sapiens OX=9606 GN=PTPRT PE=1 SV=6	1	1	2.37815	10.737	2.26212	8.61825	10.5511	13.9664	4.32529	9.14113	33.8278	4.19285	8.26472	24.2103	5.25822	5.8654	15.6521	11.0721	10.6679
sp|O14523|C2C2L_HUMAN	O14523	8.69515	9.29641	10.0905	9.58146	8.0857	8.73671	8.93167	9.98196	10.1885	8.2808	12.4559	8.65675	12.4362	11.5347	13.228	14.2458	11.3111	11.3841	11.2668	11.1281	9.15869	11.6752	1.27477	0.000111943	0.00208658	3	sp|O14523|C2C2L_HUMAN	C2CD2L	Phospholipid transfer protein C2CD2L OS=Homo sapiens OX=9606 GN=C2CD2L PE=1 SV=3	2	3	7.98987	8.86179	9.80538	9.08225	7.8252	12.1547	8.65675	12.1414	10.8165	12.6662	8.10734	8.09047	9.32181	9.28006	7.35667	14.1954	11.0312
sp|O14524|NEMP1_HUMAN	O14524	14.4913	12.6852	11.2988	11.6459	12.2643						6.95526	7.71309	7.58219	7.92878	11.8707						12.4294	8.25285	1.50607	0.0040941	0.021253		sp|O14524|NEMP1_HUMAN	NEMP1	Nuclear envelope integral membrane protein 1 OS=Homo sapiens OX=9606 GN=NEMP1 PE=1 SV=2	1	0	13.3159	12.0921	10.9795	11.0391	11.8692	6.78706	7.71309	7.40243	7.43509	11.3665	0	0	0	0	0	0	0
sp|O14525|ASTN1_HUMAN	O14525	13.3176	11.21	10.7379	8.37907	10.3481						10.1638	9.09124	12.2852	9.76521	8.9029						10.6807	9.97365	1.0709	0.485955	0.614612		sp|O14525|ASTN1_HUMAN	ASTN1	Astrotactin-1 OS=Homo sapiens OX=9606 GN=ASTN1 PE=2 SV=3	1	0	12.2374	10.6859	10.4345	7.94251	10.0147	9.91797	9.09124	11.9939	9.15717	8.52477	0	0	0	0	0	0	0
sp|O14530|TXND9_HUMAN	O14530	9.6369	9.32997	9.96657	10.0125	8.70921	3.7947	4.89171	5.09473	4.90988	5.22103	11.8249	9.8128	10.5678	11.9507	12.293	8.99796	11.7211	11.4832	26.5099	22.0818	6.72585	12.901	1.91813	0.000839817	0.00717616	3	sp|O14530|TXND9_HUMAN	TXNDC9	Thioredoxin domain-containing protein 9 OS=Homo sapiens OX=9606 GN=TXNDC9 PE=1 SV=2	5	6	8.85524	8.89378	9.68495	9.49088	8.42862	11.5389	9.8128	10.3173	11.2066	11.7709	3.52134	4.431	4.7578	4.47209	4.63837	8.96615	11.4311
sp|O14531|DPYL4_HUMAN	O14531	12.9878	11.2098	12.2581	12.9223	11.0032	14.9274	9.27871	10.0187	9.6164	12.4407	8.64902	7.74825	7.26807	10.3082	10.0471	10.7494	10.3043	9.76537	9.34314	9.69542	11.5466	9.31958	1.23896	0.00317842	0.0178768	1	sp|O14531|DPYL4_HUMAN	DPYSL4	Dihydropyrimidinase-related protein 4 OS=Homo sapiens OX=9606 GN=DPYSL4 PE=1 SV=2	29	24	11.9343	10.6857	11.9117	12.249	10.6487	8.43986	7.74825	7.09576	9.66638	9.62033	13.8521	8.40482	9.35608	8.75896	11.0523	10.7114	10.0493
sp|O14545|TRAD1_HUMAN	O14545	11.2868	10.925	11.7471	11.5876	11.9658	6.93355	9.07545	10.5141	9.65684	8.80884	9.27051	9.6783	10.0806	9.32182	8.27912	11.5228	12.0152	9.61434	12.5727	14.863	10.1233	10.5673	1.04386	0.58816	0.703516		sp|O14545|TRAD1_HUMAN	TRAFD1	TRAF-type zinc finger domain-containing protein 1 OS=Homo sapiens OX=9606 GN=TRAFD1 PE=1 SV=1	2	1	10.3713	10.4142	11.4152	10.9839	11.5803	9.04632	9.6783	9.84165	8.74139	7.92748	6.43407	8.22071	9.81873	8.79579	7.82578	11.4821	11.7179
sp|O14548|COX7R_HUMAN	O14548	13.8577	11.7938	13.3764	11.1286	11.9552	10.1616	19.3269	8.94525	7.68124	14.7221	7.65808	9.65245	8.52785	8.29163	8.02101	7.99532	11.8012	9.21119	8.81791	8.01492	11.9173	8.73134	1.36489	0.00344661	0.0187896	2	sp|O14548|COX7R_HUMAN	COX7A2L	Cytochrome c oxidase subunit 7A-related protein, mitochondrial OS=Homo sapiens OX=9606 GN=COX7A2L PE=1 SV=2	5	3	12.7337	11.2424	12.9984	10.5488	11.57	7.47288	9.65245	8.32567	7.77534	7.68033	9.42954	17.5067	8.35367	6.99635	13.0791	7.96705	11.5092
sp|O14558|HSPB6_HUMAN	O14558	7.80828	8.24829	8.85904	8.99595	10.7629	8.46142	13.1489	10.4424	9.12104	13.7159	13.7323	9.30142	12.9245	14.8714	8.5066	13.5227	11.395	8.65144	8.58778	9.07595	9.78291	10.8055	1.10453	0.303863	0.442188		sp|O14558|HSPB6_HUMAN	HSPB6	Heat shock protein beta-6 OS=Homo sapiens OX=9606 GN=HSPB6 PE=1 SV=2	2	3	7.17494	7.86267	8.60872	8.52725	10.4161	13.4002	9.30142	12.6181	13.9454	8.1453	7.85188	11.9105	9.7518	8.30777	12.1852	13.4749	11.113
sp|O14559|RHG33_HUMAN	O14559	9.11029	10.2073	7.33244	11.4776	11.6295	7.85246	12.5312	13.6657	12.6066	11.6121	8.12435	12.5437	10.1146	12.6242	10.9182	11.3168	9.55099	8.14572	10.6981	8.32889	10.6004	10.1091	1.04861	0.579643	0.695956		sp|O14559|RHG33_HUMAN	ARHGAP33	Rho GTPase-activating protein 33 OS=Homo sapiens OX=9606 GN=ARHGAP33 PE=1 SV=2	2	1	8.37134	9.7301	7.12525	10.8796	11.2548	7.92788	12.5437	9.87483	11.8381	10.4545	7.28679	11.351	12.7619	11.4825	10.3162	11.2768	9.31465
sp|O14561|ACPM_HUMAN	O14561	11.7519	11.5377	14.299	12.1068	12.7246	5.31969	4.42695	6.12193	6.6813	6.86048	6.52043	7.86315	7.98456	10.1461	9.38032	12.732	11.3897	18.2642	16.7959	16.0326	8.50218	11.0761	1.30273	0.148103	0.264706		sp|O14561|ACPM_HUMAN	NDUFAB1	Acyl carrier protein, mitochondrial OS=Homo sapiens OX=9606 GN=NDUFAB1 PE=1 SV=3	7	7	10.7987	10.9983	13.895	11.476	12.3146	6.36275	7.86315	7.79526	9.51434	8.98191	4.93647	4.01001	5.71706	6.08557	6.09486	12.687	11.1079
sp|O14562|UBFD1_HUMAN	O14562	7.72784	9.61134	9.56121	9.79014	9.16541	8.98451	12.9655	12.0831	12.9847	10.4702	12.2018	12.3901	12.3637	11.5408	9.51004	8.37546	9.11574	10.741	9.97313	10.6284	10.2003	10.5955	1.03874	0.590299	0.705409		sp|O14562|UBFD1_HUMAN	UBFD1	Ubiquitin domain-containing protein UBFD1 OS=Homo sapiens OX=9606 GN=UBFD1 PE=1 SV=2	9	10	7.10102	9.16199	9.29104	9.28006	8.87013	11.9067	12.3901	12.0706	10.8222	9.10612	8.33729	11.7444	11.284	11.8269	9.30172	8.34585	8.89017
sp|O14576|DC1I1_HUMAN	O14576	8.6483	8.77296	8.67424	9.23864	8.80203	4.88494	4.29508	7.15441	6.79591	10.4714	10.535	11.5908	11.2132	11.9386	14.5915	21.5734	14.3881	14.3495	9.087	11.5737	7.51131	12.7297	1.69474	0.000296649	0.00360333	3	sp|O14576|DC1I1_HUMAN	DYNC1I1	Cytoplasmic dynein 1 intermediate chain 1 OS=Homo sapiens OX=9606 GN=DYNC1I1 PE=1 SV=2	3	3	7.94682	8.36281	8.42914	8.75729	8.51845	10.2802	11.5908	10.9474	11.1952	13.9718	4.53304	3.89056	6.68126	6.18996	9.30278	21.4971	14.0321
sp|O14579|COPE_HUMAN	O14579	7.61651	8.10865	8.74591	8.41134	8.2721	8.68803	12.0873	11.0009	10.8549	10.9236	14.561	13.6916	13.7519	10.8595	9.69634	9.19715	11.7266	10.9068	9.92893	10.7669	9.35764	11.3761	1.2157	0.0142802	0.0498856	4	sp|O14579|COPE_HUMAN	COPE	Coatomer subunit epsilon OS=Homo sapiens OX=9606 GN=COPE PE=1 SV=3	13	8	6.99872	7.72956	8.49878	7.9731	8.0056	14.2089	13.6916	13.4259	10.1833	9.28451	8.06216	10.9489	10.2734	9.88701	9.70455	9.16463	11.4364
sp|O14593|RFXK_HUMAN	O14593	9.44484	10.6474	9.84582	11.9014	12.9913	6.63205	8.54113	11.536	11.059	10.2642	9.14056	9.3371	9.50834	10.8179	10.5127	10.5732	9.44029	11.6355	12.7527	13.3382	10.1279	10.619	1.04848	0.531335	0.655017		sp|O14593|RFXK_HUMAN	RFXANK	DNA-binding protein RFXANK OS=Homo sapiens OX=9606 GN=RFXANK PE=1 SV=2	1	1	8.67875	10.1496	9.56761	11.2813	12.5728	8.91951	9.3371	9.28291	10.1443	10.0662	6.15429	7.73671	10.7731	10.0729	9.11869	10.5358	9.20669
sp|O14595|CTDS2_HUMAN	O14595	8.34707	7.4264	9.14738	7.55367	8.17818	9.14195	9.41326	10.5986	8.1591	8.7	13.4647	15.4351	17.0115	8.25634	8.73341	15.5954	14.5698	11.1931	8.68499	9.27116	8.62107	11.797	1.3684	0.00417269	0.021558	4	sp|O14595|CTDS2_HUMAN	CTDSP2	Carboxy-terminal domain RNA polymerase II polypeptide A small phosphatase 2 OS=Homo sapiens OX=9606 GN=CTDSP2 PE=1 SV=2	1	1	7.67003	7.0792	8.88891	7.16011	7.9147	13.1391	15.4351	16.6082	7.74225	8.36248	8.48338	8.5267	9.89768	7.4316	7.72909	15.5403	14.2093
sp|O14617|AP3D1_HUMAN	O14617	8.52292	9.56248	9.63669	8.85289	9.32041	9.46485	11.9456	12.0492	11.7326	10.7217	11.6881	12.5524	12.2786	10.9929	10.4677	7.42431	8.35482	10.502	12.0777	12.0264	10.1054	10.6969	1.05853	0.414597	0.549688		sp|O14617|AP3D1_HUMAN	AP3D1	AP-3 complex subunit delta-1 OS=Homo sapiens OX=9606 GN=AP3D1 PE=1 SV=1	51	36	7.83161	9.11542	9.36439	8.39164	9.02013	11.4054	12.5524	11.9875	10.3084	10.0231	8.78302	10.8205	11.2523	10.6865	9.52519	7.39806	8.14808
sp|O14618|CCS_HUMAN	O14618	7.62724	8.87903	9.46112	8.88399	8.88401	11.3635	13.2776	11.261	12.2631	12.9186	13.0135	13.2579	11.3657	11.4616	10.9804	7.72683	9.76024	9.28882	9.6119	9.11405	10.3132	10.4238	1.01073	0.897693	0.931881		sp|O14618|CCS_HUMAN	CCS	Copper chaperone for superoxide dismutase OS=Homo sapiens OX=9606 GN=CCS PE=1 SV=1	4	6	7.00858	8.46392	9.19378	8.42112	8.59779	12.6988	13.2579	11.0962	10.7479	10.514	10.5449	12.0271	10.5163	11.1697	11.4769	7.69951	9.51872
sp|O14639|ABLM1_HUMAN	O14639	8.44618	9.73013	9.06674	10.2549	10.7751	10.1222	13.031	10.0615	10.5715	11.6193	10.0451	8.07914	8.66075	12.0659	17.0786	15.2735	8.9458	8.40984	9.36272	8.66169	10.2987	10.3044	1.00056	0.986299	0.990154		sp|O14639|ABLM1_HUMAN	ABLIM1	Actin-binding LIM protein 1 OS=Homo sapiens OX=9606 GN=ABLIM1 PE=1 SV=3	18	14	7.7611	9.27523	8.81055	9.72058	10.428	9.80218	8.07914	8.45542	11.3146	16.3532	9.393	11.8037	9.39614	9.62892	10.3226	15.2195	8.72444
sp|O14641|DVL2_HUMAN	O14641	10.0615	9.7323	10.5296	10.4143	11.0372	9.91003	11.7806	9.49569	9.17801	10.9164	10.3064	10.7599	9.79843	10.7551	10.6768	10.8608	10.9926	11.9917	9.86407	10.9106	10.2787	10.6755	1.0386	0.226302	0.359446		sp|O14641|DVL2_HUMAN	DVL2	Segment polarity protein dishevelled homolog DVL-2 OS=Homo sapiens OX=9606 GN=DVL2 PE=1 SV=1	9	14	9.24537	9.2773	10.2321	9.87169	10.6816	10.0572	10.7599	9.56613	10.0854	10.2233	9.19613	10.6711	8.8677	8.35966	9.69811	10.8224	10.7206
sp|O14647|CHD2_HUMAN	O14647	10.9089	11.1651	11.7345	10.3067	11.2913	10.3799	7.65944	8.32464	7.66181	10.2757	8.8931	9.59702	10.0985	9.74932	10.3979	18.34	14.0686	10.523	9.07883	8.90811	9.85796	10.6733	1.0827	0.38603	0.524897		sp|O14647|CHD2_HUMAN	CHD2	Chromodomain-helicase-DNA-binding protein 2 OS=Homo sapiens OX=9606 GN=CHD2 PE=1 SV=2	9	5	10.0241	10.6431	11.4029	9.76969	10.9275	8.67804	9.59702	9.85905	9.14227	9.95624	9.63217	6.93806	7.7741	6.97865	9.12892	18.2752	13.7205
sp|O14653|GOSR2_HUMAN	O14653	8.57848	10.415	10.527	10.1263	9.08082	8.22136	9.20016	11.5272	11.5069	11.1218	11.9328	12.1168	11.6112	11.3155	8.21392	9.61111	10.7481	12.5231	10.0586	11.4107	9.96447	10.8765	1.09153	0.134458	0.246161		sp|O14653|GOSR2_HUMAN	GOSR2	Golgi SNAP receptor complex member 2 OS=Homo sapiens OX=9606 GN=GOSR2 PE=1 SV=2	4	6	7.88267	9.92804	10.2295	9.5987	8.78826	11.6442	12.1168	11.3359	10.6109	7.86505	7.62911	8.33367	10.7649	10.4809	9.88059	9.57713	10.4821
sp|O14656|TOR1A_HUMAN	O14656	11.8393	11.5154	11.148	11.093	11.0923	13.8107	11.5694	10.3572	11.2168	9.93951	8.72954	9.71057	9.34784	9.75435	9.98305	9.3222	9.65841	9.52511	10.4139	10.3987	11.3185	9.67229	1.17019	0.000123009	0.00220603		sp|O14656|TOR1A_HUMAN	TOR1A	Torsin-1A OS=Homo sapiens OX=9606 GN=TOR1A PE=1 SV=1	7	10	10.879	10.977	10.833	10.515	10.7349	8.51843	9.71057	9.12622	9.14699	9.55904	12.8158	10.4798	9.67222	10.2167	8.83027	9.28924	9.41941
sp|O14657|TOR1B_HUMAN	O14657	11.3312	11.3919	10.9141	12.1537	11.8441	11.1542	10.5845	12.0736	11.1559	11.283	8.60314	7.39805	9.21132	11.713	9.78569	10.4025	8.73037	10.891	9.94888	9.92665	11.3787	9.58776	1.1868	0.00100144	0.0080168		sp|O14657|TOR1B_HUMAN	TOR1B	Torsin-1B OS=Homo sapiens OX=9606 GN=TOR1B PE=1 SV=2	2	2	10.4121	10.8593	10.6057	11.5205	11.4625	8.39509	7.39805	8.99293	10.9837	9.37006	10.3507	9.58764	11.2751	10.1612	10.0238	10.3657	8.51434
sp|O14662|STX16_HUMAN	O14662	10.3461	10.4835	10.7181	10.2746	9.69425	8.54756	11.4407	9.56497	9.3993	10.1021	10.2012	11.5762	11.0006	10.2113	9.52168	14.3727	11.4342	9.73389	10.117	10.9892	10.0281	10.843	1.08126	0.103094	0.204394		sp|O14662|STX16_HUMAN	STX16	Syntaxin-16 OS=Homo sapiens OX=9606 GN=STX16 PE=1 SV=3	9	5	9.50694	9.9934	10.4152	9.7393	9.38193	9.95455	11.5762	10.7398	9.57548	9.11727	7.93181	10.3632	8.9324	8.56122	8.97475	14.3219	11.1513
sp|O14672|ADA10_HUMAN	O14672	11.9842	11.9774	12.7868	12.6019	11.9745	11.2022	7.63692	11.5496	12.2814	9.40712	7.207	7.94781	7.65113	10.1711	10.0498	8.58211	8.61724	12.0112	12.3496	12.3113	11.22	9.5099	1.17982	0.0587171	0.13548		sp|O14672|ADA10_HUMAN	ADAM10	Disintegrin and metalloproteinase domain-containing protein 10 OS=Homo sapiens OX=9606 GN=ADAM10 PE=1 SV=1	9	13	11.0121	11.4174	12.4255	11.9453	11.5887	7.03271	7.94781	7.46973	9.53779	9.62299	10.3952	6.91766	10.7858	11.1863	8.35729	8.55177	8.40401
sp|O14678|ABCD4_HUMAN	O14678	11.5123	11.5107	9.34806	11.1689	9.68157	10.2491	11.4243	11.9981	12.224	10.1724	8.94742	10.9084	9.87792	10.2529	10.9767	9.78697	8.44552	10.2662	10.7318	10.8868	10.8873	10.0733	1.08081	0.0710479	0.156252		sp|O14678|ABCD4_HUMAN	ABCD4	ATP-binding cassette sub-family D member 4 OS=Homo sapiens OX=9606 GN=ABCD4 PE=1 SV=1	2	3	10.5785	10.9726	9.08392	10.587	9.36966	8.73104	10.9084	9.64373	9.61453	10.5105	9.51081	10.3483	11.2046	11.1341	9.03716	9.75237	8.23654
sp|O14681|EI24_HUMAN	O14681	11.2381	11.3373	10.7776	10.8703	9.9119	12.2095	11.3854	10.2327	10.9654	10.7397	9.29959	8.97983	10.3009	11.008	10.5091	6.74749	7.38032	13.6299	9.90827	13.0346	10.9501	9.86435	1.11007	0.168525	0.290681		sp|O14681|EI24_HUMAN	EI24	Etoposide-induced protein 2.4 homolog OS=Homo sapiens OX=9606 GN=EI24 PE=1 SV=4	4	3	10.3266	10.8073	10.4731	10.3039	9.59257	9.0747	8.97983	10.0567	10.3226	10.0627	11.33	10.3131	9.55596	9.98767	9.54115	6.72363	7.1977
sp|O14683|P5I11_HUMAN	O14683						15.7905	12.1625	7.17715	7.19301	11.524						6.26026	30.6785	5.3699	4.79305	5.03371	10.2701	7.57144	1.35643	0.470171	0.600647		sp|O14683|P5I11_HUMAN	TP53I11	Tumor protein p53-inducible protein 11 OS=Homo sapiens OX=9606 GN=TP53I11 PE=1 SV=2	0	1	0	0	0	0	0	0	0	0	0	0	14.653	11.017	6.7025	6.55165	10.2379	6.23813	29.9194
sp|O14684|PTGES_HUMAN	O14684	5.82179	10.7504	4.60462	14.456	9.17314	4.60362	23.7807	6.96872	6.60938	26.8092	19.0128	4.93958	14.7896	15.8052	4.79884	8.50045	13.3871	4.35035	6.99826	5.58527	9.36087	8.52966	1.09745	0.730447	0.81345		sp|O14684|PTGES_HUMAN	PTGES	Prostaglandin E synthase OS=Homo sapiens OX=9606 GN=PTGES PE=1 SV=2	2	2	5.34958	10.2478	4.47451	13.7028	8.87761	18.553	4.93958	14.439	14.8211	4.59502	4.27199	21.541	6.50785	6.02006	23.8173	8.4704	13.0558
sp|O14686|KMT2D_HUMAN	O14686						8.58636	5.82594	8.79641	6.33788	7.5009						16.6544	13.9093	17.5517	7.25655	12.2774	7.3132	12.9359	1.76885	0.0123792	0.0448552		sp|O14686|KMT2D_HUMAN	KMT2D	Histone-lysine N-methyltransferase 2D OS=Homo sapiens OX=9606 GN=KMT2D PE=1 SV=2	0	2	0	0	0	0	0	0	0	0	0	0	7.96782	5.27724	8.21467	5.77277	6.66381	16.5955	13.5651
sp|O14713|ITBP1_HUMAN	O14713						6.83819	8.0973	7.53345	8.57229	16.7822						11.7889	18.0803	9.44323	9.58493	9.12908	9.02909	11.1986	1.24028	0.327973	0.466323		sp|O14713|ITBP1_HUMAN	ITGB1BP1	Integrin beta-1-binding protein 1 OS=Homo sapiens OX=9606 GN=ITGB1BP1 PE=1 SV=1	0	1	0	0	0	0	0	0	0	0	0	0	6.34558	7.33468	7.03523	7.80795	14.9093	11.7472	17.6329
sp|O14727|APAF_HUMAN	O14727	8.55409	10.4828	8.89371	10.7994	10.8536						12.6454	10.1873	11.2978	11.2864	9.00621						9.866	10.8147	1.09616	0.264359	0.400799		sp|O14727|APAF_HUMAN	APAF1	Apoptotic protease-activating factor 1 OS=Homo sapiens OX=9606 GN=APAF1 PE=1 SV=2	3	0	7.86025	9.99271	8.64241	10.2367	10.5039	12.3396	10.1873	11.0299	10.5836	8.62369	0	0	0	0	0	0	0
sp|O14732|IMPA2_HUMAN	O14732	9.70029	10.1043	10.7837	10.7754	9.8779	7.93776	7.96518	10.6145	11.1159	7.49313	9.63385	12.5264	10.9195	10.1096	9.53907	8.91275	10.4507	13.7503	12.574	14.7399	9.54676	11.1674	1.16975	0.0403959	0.10344		sp|O14732|IMPA2_HUMAN	IMPA2	Inositol monophosphatase 2 OS=Homo sapiens OX=9606 GN=IMPA2 PE=1 SV=1	4	3	8.91348	9.63193	10.479	10.214	9.55966	9.40087	12.5264	10.6606	9.48014	9.13392	7.36594	7.215	9.9125	10.1248	6.6569	8.88124	10.1921
sp|O14734|ACOT8_HUMAN	O14734	13.9577	12.2769	12.0546	12.3157	10.1387	8.33744	7.84651	9.30299	9.33106	9.80796	7.41318	10.5143	9.42621	8.6597	7.51944	14.9746	12.869	12.3832	10.2356	10.2623	10.3689	10.1833	1.01822	0.852089	0.903785		sp|O14734|ACOT8_HUMAN	ACOT8	Acyl-coenzyme A thioesterase 8 OS=Homo sapiens OX=9606 GN=ACOT8 PE=1 SV=1	6	8	12.8256	11.7029	11.714	11.674	9.81202	7.23391	10.5143	9.20273	8.1205	7.20007	7.73683	7.10751	8.68775	8.49906	8.7134	14.9217	12.5506
sp|O14735|CDIPT_HUMAN	O14735	10.2296	12.6606	10.724	11.2931	11.5423	15.804	13.373	11.2151	11.6703	10.268	8.9931	9.3492	9.51619	9.07082	10.7713	8.10085	8.09635	9.00569	9.98978	9.0072	11.7792	9.15913	1.28606	9.42299e-05	0.00185317	2	sp|O14735|CDIPT_HUMAN	CDIPT	CDP-diacylglycerol--inositol 3-phosphatidyltransferase OS=Homo sapiens OX=9606 GN=CDIPT PE=1 SV=1	6	6	9.39986	12.0687	10.421	10.7047	11.1704	8.77562	9.3492	9.29058	8.50602	10.3138	14.6655	12.1135	10.4734	10.6297	9.12214	8.07221	7.89601
sp|O14737|PDCD5_HUMAN	O14737	9.65718	10.0659	10.4349	10.3059	10.9395	7.23518	8.56474	8.81844	8.87652	9.09458	10.4641	10.5798	10.1411	11.0637	10.4108	14.5774	12.9077	12.1203	11.3707	11.7274	9.33868	11.4675	1.22796	0.001034	0.0082341	3	sp|O14737|PDCD5_HUMAN	PDCD5	Programmed cell death protein 5 OS=Homo sapiens OX=9606 GN=PDCD5 PE=1 SV=3	5	9	8.87387	9.59526	10.14	9.76895	10.5871	10.211	10.5798	9.90063	10.3748	9.96863	6.71397	7.7581	8.23524	8.08505	8.07963	14.5259	12.5883
sp|O14744|ANM5_HUMAN	O14744	11.8358	10.3286	10.7552	10.2062	9.90925	9.50685	9.38951	11.6856	11.9363	10.7764	9.16052	9.72711	9.56779	12.3906	10.3773	8.65364	10.3175	11.3188	11.2374	11.237	10.596	10.3414	1.02463	0.59488	0.7091		sp|O14744|ANM5_HUMAN	PRMT5	Protein arginine N-methyltransferase 5 OS=Homo sapiens OX=9606 GN=PRMT5 PE=1 SV=4	21	20	10.8758	9.84576	10.4513	9.67442	9.59	8.93899	9.72711	9.34095	11.6191	9.93654	8.822	8.50519	10.9128	10.872	9.57379	8.62305	10.0622
sp|O14745|NHRF1_HUMAN	O14745	8.67479	9.74938	9.06008	8.18723	6.38615	5.53214	5.83084	10.6595	11.0997	5.4883	10.1123	18.6372	13.0091	12.0903	7.77717	8.95444	5.65311	21.2033	14.1689	16.5247	7.80523	11.9205	1.52724	0.0140564	0.0492622	4	sp|O14745|NHRF1_HUMAN	SLC9A3R1	Na(+)/H(+) exchange regulatory cofactor NHE-RF1 OS=Homo sapiens OX=9606 GN=SLC9A3R1 PE=1 SV=4	49	58	7.97116	9.29358	8.80407	7.76066	6.18041	9.86777	18.6372	12.7007	11.3375	7.44685	5.13362	5.28168	9.95459	10.11	4.87581	8.92278	5.51322
sp|O14772|FPGT_HUMAN	O14772	8.09264	11.416	9.97892	10.4513	10.7237	5.55101	7.27214	12.5622	12.4871	10.1159	9.83591	10.608	9.76854	12.3616	10.8246	6.16899	8.50593	15.3641	13.1714	14.6552	9.5957	10.7816	1.12359	0.33631	0.474779		sp|O14772|FPGT_HUMAN	FPGT	Fucose-1-phosphate guanylyltransferase OS=Homo sapiens OX=9606 GN=FPGT PE=1 SV=3	3	2	7.43623	10.8823	9.69695	9.90675	10.3782	9.59805	10.608	9.53694	11.5919	10.3648	5.15113	6.58724	11.7314	11.3737	8.98699	6.14718	8.29545
sp|O14773|TPP1_HUMAN	O14773	11.2487	11.2965	9.59927	10.4676	8.5377	13.1704	12.5445	12.2826	14.4128	10.4693	8.96612	12.0169	11.1251	10.7588	10.0947	6.59361	9.70072	8.29138	9.25708	9.90492	11.281	9.55308	1.18088	0.0340264	0.0916605		sp|O14773|TPP1_HUMAN	TPP1	Tripeptidyl-peptidase 1 OS=Homo sapiens OX=9606 GN=TPP1 PE=1 SV=2	28	33	10.3363	10.7684	9.32803	9.92227	8.26264	8.74929	12.0169	10.8613	10.0889	9.66592	12.2216	11.363	11.4703	13.1277	9.30098	6.5703	9.46068
sp|O14776|TCRG1_HUMAN	O14776	11.4994	11.9471	12.3595	12.0129	10.4913	12.9417	10.7666	11.4203	10.8625	10.6488	8.76645	9.18021	8.34688	9.73274	9.90443	9.5661	9.46868	10.5176	9.73121	10.2454	11.4694	9.52555	1.20406	1.25115e-05	0.000573191	1	sp|O14776|TCRG1_HUMAN	TCERG1	Transcription elongation regulator 1 OS=Homo sapiens OX=9606 GN=TCERG1 PE=1 SV=2	18	13	10.5667	11.3886	12.0103	11.387	10.1533	8.55445	9.18021	8.14899	9.12672	9.48376	12.0094	9.75262	10.665	9.89396	9.46038	9.53228	9.23438
sp|O14786|NRP1_HUMAN	O14786	7.45245	9.58344	6.84769	13.1191	10.8593	7.7893	7.58042	7.61082	7.36916	12.171	16.846	6.61737	15.2031	9.99934	7.45884	15.6175	16.0918	11.1799	10.6911	9.19819	8.80732	11.3322	1.28668	0.0653706	0.146953		sp|O14786|NRP1_HUMAN	NRP1	Neuropilin-1 OS=Homo sapiens OX=9606 GN=NRP1 PE=1 SV=3	2	1	6.84797	9.1354	6.6542	12.4356	10.5094	16.4386	6.61737	14.8427	9.37672	7.14204	7.22818	6.86648	7.10749	6.71209	10.8127	15.5623	15.6936
sp|O14787|TNPO2_HUMAN	O14787	8.70081	8.53527	9.61839	8.94295	9.18309	11.091	10.9712	11.1881	11.376	10.1316	12.5696	14.2922	12.134	9.86072	9.92868	6.7443	9.7402	10.7184	12.1656	12.0854	9.91745	10.8249	1.0915	0.252071	0.388136		sp|O14787|TNPO2_HUMAN	TNPO2	Transportin-2 OS=Homo sapiens OX=9606 GN=TNPO2 PE=1 SV=3	12	13	7.99507	8.13623	9.34661	8.47701	8.88724	12.2656	14.2922	11.8463	9.24673	9.50698	10.292	9.93795	10.4482	10.3617	9.00094	6.72046	9.49918
sp|O14795|UN13B_HUMAN	O14795	10.7006	10.631	10.715	10.3247	8.47947	8.29138	7.89698	17.3841	16.6028	9.60218	9.09389	12.6487	10.4562	10.3999	10.5947	6.70072	7.08113	10.6969	11.1963	10.9276	10.6832	9.80701	1.08934	0.431328	0.563907		sp|O14795|UN13B_HUMAN	UNC13B	Protein unc-13 homolog B OS=Homo sapiens OX=9606 GN=UNC13B PE=1 SV=2	8	3	9.83265	10.134	10.4122	9.78681	8.20628	8.87397	12.6487	10.2083	9.75232	10.1447	7.69409	7.15323	16.2344	15.1224	8.53059	6.67703	6.90591
sp|O14802|RPC1_HUMAN	O14802	11.9991	10.7078	10.248	11.0691	11.6877	10.1901	9.28616	8.38466	8.24264	8.71599	9.13688	9.40107	9.68159	8.18727	12.0712	13.823	12.4347	11.8543	10.9589	11.5098	9.9706	10.7765	1.08082	0.262369	0.398823		sp|O14802|RPC1_HUMAN	POLR3A	DNA-directed RNA polymerase III subunit RPC1 OS=Homo sapiens OX=9606 GN=POLR3A PE=1 SV=2	3	2	11.0258	10.2072	9.95841	10.4924	11.3112	8.91592	9.40107	9.45206	7.67748	11.5585	9.456	8.41157	7.83015	7.50769	7.74329	13.7741	12.127
sp|O14807|RASM_HUMAN	O14807						8.98851	25.2056	8.62626	8.26989	8.06329						8.36728	9.74661	10.5078	9.60174	9.11168	10.544	9.44017	1.11693	0.625569	0.733835		sp|O14807|RASM_HUMAN	MRAS	Ras-related protein M-Ras OS=Homo sapiens OX=9606 GN=MRAS PE=1 SV=2	0	1	0	0	0	0	0	0	0	0	0	0	8.341	22.8317	8.05577	7.53251	7.16343	8.3377	9.50543
sp|O14817|TSN4_HUMAN	O14817	10.5766	11.3982	8.84792	10.69	10.2591	10.0216	8.34334	9.57456	10.4704	11.3002	11.06	6.78973	10.9939	11.4352	12.2376	14.395	10.9891	9.5745	11.1268	9.9369	10.1031	10.6822	1.05732	0.424136	0.558097		sp|O14817|TSN4_HUMAN	TSPAN4	Tetraspanin-4 OS=Homo sapiens OX=9606 GN=TSPAN4 PE=1 SV=1	4	3	9.71873	10.8653	8.59791	10.133	9.92855	10.7925	6.78973	10.7333	10.7232	11.7178	9.29968	7.55755	8.94136	9.53679	10.0391	14.3441	10.7172
sp|O14818|PSA7_HUMAN	O14818	10.6674	9.66358	9.64532	9.36559	9.56703	8.47149	8.99428	10.5704	10.9492	12.3637	11.1383	10.9732	10.7772	11.5704	10.7182	9.16759	12.6507	10.4137	11.4874	10.9361	9.97097	10.9501	1.0982	0.044622	0.111249		sp|O14818|PSA7_HUMAN	PSMA7	Proteasome subunit alpha type-7 OS=Homo sapiens OX=9606 GN=PSMA7 PE=1 SV=1	41	31	9.80219	9.21179	9.37278	8.87763	9.25881	10.8689	10.9732	10.5217	10.85	10.263	7.86122	8.14718	9.87133	9.97289	10.9839	9.13518	12.3377
sp|O14827|RGRF2_HUMAN	O14827	10.9446	10.0487	13.1035	11.0037	14.048	8.82658	6.31648	13.1936	11.5885	17.252	6.90767	6.32955	5.50634	10.7182	15.7786	6.14862	7.8234	12.3071	13.107	9.92215	11.2599	8.9047	1.26449	0.123048	0.231374		sp|O14827|RGRF2_HUMAN	RASGRF2	Ras-specific guanine nucleotide-releasing factor 2 OS=Homo sapiens OX=9606 GN=RASGRF2 PE=1 SV=2	4	3	10.0569	9.57889	12.7332	10.4304	13.5954	6.74062	6.32955	5.37579	10.0508	15.1084	8.19073	5.72158	12.3211	10.5552	15.3267	6.12688	7.62981
sp|O14828|SCAM3_HUMAN	O14828	10.2194	11.0493	11.2537	10.0465	8.84435	16.9108	13.5052	11.2119	12.1432	7.96896	10.237	13.71	11.9721	9.70351	6.86306	5.55306	7.04646	10.382	10.4153	11.3783	11.0836	9.40018	1.17909	0.159195	0.280038		sp|O14828|SCAM3_HUMAN	SCAMP3	Secretory carrier-associated membrane protein 3 OS=Homo sapiens OX=9606 GN=SCAMP3 PE=1 SV=3	13	13	9.39047	10.5327	10.9357	9.5231	8.55941	9.98948	13.71	11.6883	9.09931	6.57157	15.6926	12.2333	10.4704	11.0605	7.07963	5.53343	6.8721
sp|O14832|PAHX_HUMAN	O14832	14.0458	11.7751	12.7819	13.4975	11.8967	11.711	8.02448	9.48141	9.1134	9.80701	7.771	8.49739	7.20703	8.47041	8.43931	10.915	11.3678	12.313	10.977	11.943	11.0456	9.62363	1.14776	0.123655	0.232254		sp|O14832|PAHX_HUMAN	PHYH	Phytanoyl-CoA dioxygenase, peroxisomal OS=Homo sapiens OX=9606 GN=PHYH PE=1 SV=1	3	5	12.9065	11.2246	12.4207	12.7943	11.5134	7.58307	8.49739	7.03616	7.94299	8.08087	10.8674	7.26872	8.85437	8.30081	8.71256	10.8764	11.0865
sp|O14841|OPLA_HUMAN	O14841	10.8086	10.8091	10.2969	10.0002	9.14504	9.97871	10.0445	11.0508	10.951	12.035	9.84544	9.89314	9.57782	10.6993	13.1008	9.38583	9.83682	9.78457	11.7329	11.3555	10.4852	10.464	1.00203	0.964119	0.976315		sp|O14841|OPLA_HUMAN	OPLAH	5-oxoprolinase OS=Homo sapiens OX=9606 GN=OPLAH PE=1 SV=3	27	25	9.93192	10.3038	10.0059	9.47921	8.85041	9.60735	9.89314	9.35075	10.0331	12.5444	9.25987	9.0985	10.32	9.97454	10.6919	9.35265	9.59341
sp|O14863|ZNT4_HUMAN	O14863	15.273	13.2639	10.1705	10.5887	9.72672	8.35714	7.76788	9.45832	7.6006	9.24798	8.38439	9.06326	8.4607	10.1247	9.38794	23.5826	12.9212	10.913	6.82479	8.23578	9.91247	10.1339	1.02233	0.860345	0.910219		sp|O14863|ZNT4_HUMAN	SLC30A4	Zinc transporter 4 OS=Homo sapiens OX=9606 GN=SLC30A4 PE=1 SV=2	2	1	14.0342	12.6438	9.88314	10.037	9.41335	8.18163	9.06326	8.26011	9.49424	8.98921	7.75511	7.03629	8.8328	6.9229	8.21591	23.4992	12.6015
sp|O14874|BCKD_HUMAN	O14874	11.7515	11.8978	11.6879	11.4218	12.3997	11.2237	9.06227	10.8214	11.0517	10.6036	8.69724	9.19575	8.01531	8.70688	10.4467	12.0066	9.52112	10.476	10.5279	10.6224	11.1557	9.75574	1.1435	0.011087	0.0415466		sp|O14874|BCKD_HUMAN	BCKDK	[3-methyl-2-oxobutanoate dehydrogenase [lipoamide]] kinase, mitochondrial OS=Homo sapiens OX=9606 GN=BCKDK PE=1 SV=2	9	6	10.7983	11.3416	11.3576	10.8267	12.0002	8.48691	9.19575	7.82528	8.16474	10.003	10.4152	8.20877	10.1057	10.0663	9.42023	11.9642	9.28552
sp|O14879|IFIT3_HUMAN	O14879	8.47503	7.22922	7.03496	7.88269	9.84488	4.93432	10.4228	7.94775	8.91644	18.2746	12.4529	11.5964	12.7459	12.7902	13.8895	15.9626	18.1909	7.55082	7.63822	6.08898	8.60573	11.2798	1.31073	0.0964167	0.195065		sp|O14879|IFIT3_HUMAN	IFIT3	Interferon-induced protein with tetratricopeptide repeats 3 OS=Homo sapiens OX=9606 GN=IFIT3 PE=1 SV=1	2	2	7.78761	6.89124	6.83618	7.47199	9.5277	12.1518	11.5964	12.4437	11.9938	13.2996	4.57886	9.44117	7.42213	8.12141	16.2352	15.9062	17.7408
sp|O14880|MGST3_HUMAN	O14880	11.6335	11.0881	10.0706	11.352	11.8125	13.1499	11.2684	9.587	9.55807	14.7709	8.5549	8.50107	8.96462	10.4189	11.896	6.87984	10.5735	7.39622	13.5925	9.79061	11.3326	9.46752	1.19699	0.0352961	0.0941208		sp|O14880|MGST3_HUMAN	MGST3	Microsomal glutathione S-transferase 3 OS=Homo sapiens OX=9606 GN=MGST3 PE=1 SV=1	14	10	10.6899	10.5697	9.78603	10.7605	11.4319	8.34802	8.50107	8.75208	9.77017	11.3907	12.2026	10.2071	8.95297	8.70583	13.1225	6.85552	10.3119
sp|O14907|TX1B3_HUMAN	O14907	10.1461	10.6728	8.58097	12.2646	12.2224	5.63532	7.86476	9.90821	10.3368	12.355	6.98241	7.52431	5.57443	15.6371	14.8997	16.5466	14.0341	9.26403	9.77733	9.7892	9.75607	10.3459	1.06045	0.674493	0.770661		sp|O14907|TX1B3_HUMAN	TAX1BP3	Tax1-binding protein 3 OS=Homo sapiens OX=9606 GN=TAX1BP3 PE=1 SV=2	2	4	9.32309	10.1738	8.3385	11.6256	11.8286	6.81355	7.52431	5.44227	14.6634	14.2669	5.22936	7.12404	9.25294	9.41513	10.9762	16.4881	13.6868
sp|O14908|GIPC1_HUMAN	O14908	10.044	9.79791	10.5946	10.7257	10.5519	8.1482	8.67831	11.9525	10.9435	10.874	12.1013	9.3692	10.5201	10.2221	10.154	12.5599	9.79756	10.4582	10.9704	11.4339	10.1727	10.7169	1.0535	0.27739	0.414125		sp|O14908|GIPC1_HUMAN	GIPC1	PDZ domain-containing protein GIPC1 OS=Homo sapiens OX=9606 GN=GIPC1 PE=1 SV=2	5	6	9.22927	9.33984	10.2952	10.1669	10.2119	11.8087	9.3692	10.2707	9.58559	9.72269	7.56122	7.86097	11.162	9.96774	9.66046	12.5155	9.55512
sp|O14910|LIN7A_HUMAN	O14910	11.3978	10.6721	12.1549	9.04878	11.3578	12.5584	7.08797	8.68176	8.73928	5.43381	9.35619	13.31	11.0489	7.90908	7.65456	8.50727	10.1487	16.2281	13.7913	14.1201	9.43268	10.8556	1.15085	0.251675	0.38793		sp|O14910|LIN7A_HUMAN	LIN7A	Protein lin-7 homolog A OS=Homo sapiens OX=9606 GN=LIN7A PE=1 SV=2	9	7	10.4733	10.1732	11.8114	8.57733	10.9919	9.12993	13.31	10.7869	7.41661	7.32945	11.6537	6.42041	8.1076	7.96005	4.8274	8.47719	9.89762
sp|O14920|IKKB_HUMAN	O14920	9.41234	9.53902	11.5838	11.48	11.2676	8.29493	6.94521	8.8468	8.0176	9.37066	9.60704	9.27334	9.34469	10.3275	12.281	16.8065	15.042	10.0417	11.5609	10.2156	9.35821	11.2214	1.1991	0.0443559	0.110671		sp|O14920|IKKB_HUMAN	IKBKB	Inhibitor of nuclear factor kappa-B kinase subunit beta OS=Homo sapiens OX=9606 GN=IKBKB PE=1 SV=1	2	3	8.64889	9.09306	11.2565	10.8819	10.9046	9.37471	9.27334	9.12314	9.68447	11.7594	7.69738	6.2911	8.26173	7.30272	8.3249	16.7471	14.6698
sp|O14924|RGS12_HUMAN	O14924	12.0212	9.93321	10.3869	12.8435	13.7969	14.9614	8.89204	13.8647	12.5798	11.879	5.59801	8.37973	5.57129	14.7827	11.1968	4.94679	8.03746	8.96552	12.7893	9.70652	11.9738	8.47616	1.41265	0.0143096	0.0499424	1	sp|O14924|RGS12_HUMAN	RGS12	Regulator of G-protein signaling 12 OS=Homo sapiens OX=9606 GN=RGS12 PE=1 SV=1	2	1	11.0461	9.46882	10.0934	12.1743	13.3524	5.46263	8.37973	5.4392	13.8622	10.7212	13.8836	8.05457	12.9478	11.4581	10.5533	4.9293	7.83857
sp|O14925|TIM23_HUMAN	O14925	10.0202	11.2432	12.0526	10.9728	11.1418	15.1237	10.392	13.2938	12.186	10.8762	8.96575	11.6241	8.83542	9.19056	9.98587	6.38654	7.43548	9.6011	11.3743	9.86765	11.6479	9.19588	1.26664	0.00301358	0.0172318	2	sp|O14925|TIM23_HUMAN	TIMM23	Mitochondrial import inner membrane translocase subunit Tim23 OS=Homo sapiens OX=9606 GN=TIMM23 PE=1 SV=1	3	2	9.20746	10.7176	11.712	10.4011	10.7828	8.74893	11.6241	8.62595	8.6183	9.56174	14.0342	9.4133	12.4146	11.0994	9.66247	6.36396	7.25149
sp|O14929|HAT1_HUMAN	O14929	10.9585	9.6309	10.7831	9.30189	9.33419	9.51995	8.1016	10.4593	7.24695	6.44411	10.9161	10.9673	10.5052	10.995	10.6888	16.3673	12.1634	15.2023	10.9908	8.4746	9.05906	11.534	1.2732	0.00815859	0.0339421	3	sp|O14929|HAT1_HUMAN	HAT1	Histone acetyltransferase type B catalytic subunit OS=Homo sapiens OX=9606 GN=HAT1 PE=1 SV=1	3	1	10.0696	9.18064	10.4784	8.81725	9.03347	10.6521	10.9673	10.2561	10.3104	10.2348	8.83415	7.33858	9.76758	6.60078	5.72495	16.3094	11.8624
sp|O14933|UB2L6_HUMAN	O14933	7.85593	8.53306	7.66515	9.06463	8.54429	8.43902	12.1391	13.0666	12.0963	12.9735	12.6772	13.8034	12.1395	11.8364	11.7094	8.05089	8.97666	9.21601	10.7311	10.7892	9.82246	10.8545	1.10507	0.269552	0.406816		sp|O14933|UB2L6_HUMAN	UBE2L6	Ubiquitin/ISG15-conjugating enzyme E2 L6 OS=Homo sapiens OX=9606 GN=UBE2L6 PE=1 SV=4	4	5	7.21872	8.13413	7.44856	8.59235	8.26902	12.3706	13.8034	11.8517	11.0994	11.2121	7.83109	10.9958	12.2025	11.0177	11.5257	8.02243	8.75453
sp|O14936|CSKP_HUMAN	O14936	11.2519	10.6179	11.4182	10.8844	12.7512	11.9066	9.64067	10.6072	10.7687	10.3712	9.65268	9.77737	8.97191	9.37453	9.44036	8.65103	10.0234	11.9961	10.9696	11.0869	10.9918	9.94676	1.10507	0.0242251	0.0718533		sp|O14936|CSKP_HUMAN	CASK	Peripheral plasma membrane protein CASK OS=Homo sapiens OX=9606 GN=CASK PE=1 SV=3	22	29	10.3392	10.1215	11.0956	10.3173	12.3404	9.41925	9.77737	8.7592	8.79082	9.0394	11.0489	8.73269	9.90566	9.80855	9.2138	8.62044	9.77537
sp|O14949|QCR8_HUMAN	O14949	13.1813	9.96409	13.4294	10.615	11.1013	10.2981	8.34844	8.69875	7.77566	9.2842	8.77556	10.5201	9.47998	8.61184	8.48015	9.50815	10.077	15.5089	12.6565	13.3488	10.1159	10.4842	1.03641	0.685361	0.778982		sp|O14949|QCR8_HUMAN	UQCRQ	Cytochrome b-c1 complex subunit 8 OS=Homo sapiens OX=9606 GN=UQCRQ PE=1 SV=4	2	2	12.1121	9.49825	13.0499	10.0619	10.7436	8.56334	10.5201	9.25523	8.07562	8.11997	9.55625	7.56217	8.12347	7.08235	8.24809	9.47453	9.82763
sp|O14950|ML12B_HUMAN	O14950	8.42555	9.41853	8.73602	10.3873	8.96842	8.87789	12.5915	8.79549	8.95619	14.7186	10.9859	7.01842	8.89096	11.08	20.3191	15.6357	11.677	7.86045	8.76107	8.1851	9.8237	10.4736	1.06615	0.592486	0.706951		sp|O14950|ML12B_HUMAN	MYL12B	Myosin regulatory light chain 12B OS=Homo sapiens OX=9606 GN=MYL12B PE=1 SV=2	72	57	7.74214	8.9782	8.48917	9.84608	8.67948	10.7202	7.01842	8.68017	10.3901	19.4561	8.23835	11.4056	8.21381	8.15762	13.076	15.5804	11.3881
sp|O14957|QCR10_HUMAN	O14957						12.7058	8.67546	9.01866	9.29293	8.90582						4.04649	11.1044	11.9541	16.3372	13.911	9.61729	10.407	1.08211	0.742967	0.823414		sp|O14957|QCR10_HUMAN	UQCR11	Cytochrome b-c1 complex subunit 10 OS=Homo sapiens OX=9606 GN=UQCR11 PE=1 SV=1	0	1	0	0	0	0	0	0	0	0	0	0	11.7905	7.85839	8.42222	8.46433	7.91194	4.03218	10.8296
sp|O14958|CASQ2_HUMAN	O14958	27.086	13.046	15.5931	11.3322	14.2379	29.4174	5.11154	12.6865	10.4485	10.7698	4.30771	6.88818	4.23973	4.20658	3.99559	5.43783	10.2102	6.31391	8.96939	7.2908	13.4297	5.8688	2.28833	0.000384326	0.00428899	1	sp|O14958|CASQ2_HUMAN	CASQ2	Calsequestrin-2 OS=Homo sapiens OX=9606 GN=CASQ2 PE=1 SV=2	20	20	24.889	12.4361	15.1525	10.7418	13.7792	4.20354	6.88818	4.13921	3.94465	3.82589	27.2982	4.63013	11.8475	9.51683	9.56794	5.4186	9.95756
sp|O14964|HGS_HUMAN	O14964	9.89291	10.4164	9.09176	9.50782	9.40982	9.43489	11.8941	13.1659	13.5246	12.0016	10.7758	11.5982	10.3797	12.8777	10.1337	6.11657	7.96382	10.7111	10.6505	11.0932	10.7232	10.0427	1.06775	0.437174	0.569397		sp|O14964|HGS_HUMAN	HGS	Hepatocyte growth factor-regulated tyrosine kinase substrate OS=Homo sapiens OX=9606 GN=HGS PE=1 SV=1	15	18	9.09048	9.92937	8.83486	9.01245	9.10666	10.5152	11.5982	10.1336	12.0759	9.70333	8.75522	10.7739	12.2952	12.3187	10.6622	6.09494	7.76676
sp|O14966|RAB7L_HUMAN	O14966	10.8347	11.7674	10.6204	11.6589	10.712	10.5091	10.7888	14.022	15.5706	11.6389	7.50944	8.62064	8.03939	10.9644	13.5861	7.9317	6.93074	7.65395	11.5432	10.0621	11.7159	9.07506	1.29099	0.00577553	0.0271023	2	sp|O14966|RAB7L_HUMAN	RAB29	Ras-related protein Rab-7L1 OS=Homo sapiens OX=9606 GN=RAB29 PE=1 SV=1	9	5	9.95591	11.2173	10.3203	11.0515	10.3669	7.32784	8.62064	7.84879	10.2817	13.0091	9.75203	9.77271	13.0947	14.1823	10.34	7.90366	6.75924
sp|O14967|CLGN_HUMAN	O14967	11.4224	16.2239	13.1408	14.6776	9.93024	18.1031	10.7798	11.9213	14.4243	11.1842	6.38073	7.79129	5.91651	11.7747	7.21707	7.14631	6.21794	8.86462	8.58214	9.53012	12.9555	7.77309	1.66671	2.74233e-05	0.000895083	1	sp|O14967|CLGN_HUMAN	CLGN	Calmegin OS=Homo sapiens OX=9606 GN=CLGN PE=1 SV=1	26	31	10.4959	15.4654	12.7695	13.9129	9.61031	6.22642	7.79129	5.77624	11.0415	6.91054	16.799	9.76454	11.1329	13.1382	9.93602	7.12104	6.06408
sp|O14972|VP26C_HUMAN	O14972	9.67418	9.92485	10.2545	10.2028	9.18485	8.94598	10.5968	11.185	11.146	9.9407	10.5272	11.6111	11.2923	11.2503	10.0954	10.2533	11.3132	10.7595	10.8517	10.9338	10.081	10.8787	1.07913	0.0123279	0.0447728		sp|O14972|VP26C_HUMAN	VPS26C	Vacuolar protein sorting-associated protein 26C OS=Homo sapiens OX=9606 GN=VPS26C PE=1 SV=1	9	7	8.88949	9.46085	9.96474	9.67118	8.88894	10.2726	11.6111	11.0246	10.5498	9.66665	8.30153	9.59874	10.4453	10.1522	8.83133	10.217	11.0333
sp|O14974|MYPT1_HUMAN	O14974	8.74116	8.73404	9.38226	8.59155	10.6591	9.82017	10.6466	7.30445	6.60184	10.6661	12.1477	8.53244	8.7203	10.4014	18.184	16.7579	14.5998	11.3142	8.86743	8.77056	9.01047	11.3917	1.26428	0.0361934	0.0958883	3	sp|O14974|MYPT1_HUMAN	PPP1R12A	Protein phosphatase 1 regulatory subunit 12A OS=Homo sapiens OX=9606 GN=PPP1R12A PE=1 SV=1	18	16	8.03215	8.32571	9.11715	8.14392	10.3157	11.8539	8.53244	8.51356	9.75372	17.4117	9.11275	9.64387	6.82138	6.01319	9.47581	16.6987	14.2385
sp|O14975|S27A2_HUMAN	O14975	11.3064	9.2178	10.614	8.20608	10.1457	7.39811	7.11582	12.4373	12.4969	6.44128	9.58594	16.9339	11.8303	8.85201	7.07417	5.66185	6.42081	15.2339	15.7172	16.7768	9.30271	10.5792	1.13722	0.400542	0.537368		sp|O14975|S27A2_HUMAN	SLC27A2	Very long-chain acyl-CoA synthetase OS=Homo sapiens OX=9606 GN=SLC27A2 PE=1 SV=2	6	13	10.3893	8.78685	10.3141	7.77853	9.8188	9.35412	16.9339	11.5498	8.30083	6.77371	6.86517	6.44564	11.6148	11.3826	5.72244	5.64183	6.26193
sp|O14976|GAK_HUMAN	O14976	9.71255	9.38444	9.73383	9.81386	9.22039	8.11342	9.85355	11.0661	11.3849	9.27857	10.9856	11.9713	11.1539	11.3286	10.6954	10.7514	10.692	12.2652	10.8049	11.563	9.71677	11.209	1.15357	0.000493119	0.00499357		sp|O14976|GAK_HUMAN	GAK	Cyclin-G-associated kinase OS=Homo sapiens OX=9606 GN=GAK PE=1 SV=2	15	12	8.92475	8.9457	9.45879	9.30254	8.92333	10.7199	11.9713	10.8895	10.6232	10.2411	7.52895	8.92552	10.3343	10.3698	8.24309	10.7134	10.4274
sp|O14979|HNRDL_HUMAN	O14979	11.7446	10.8679	11.8596	10.209	15.7968	16.0435	11.2613	11.7046	10.4482	11.5891	9.45097	7.95713	9.10065	7.91604	9.26456	7.71115	8.73862	9.77994	10.2773	8.90187	12.0114	8.87339	1.35365	6.17699e-05	0.00148658	1	sp|O14979|HNRDL_HUMAN	HNRNPDL	Heterogeneous nuclear ribonucleoprotein D-like OS=Homo sapiens OX=9606 GN=HNRNPDL PE=1 SV=3	32	22	10.792	10.3598	11.5245	9.67711	15.2879	9.22242	7.95713	8.88489	7.42314	8.87107	14.8878	10.2007	10.9305	9.51662	10.2958	7.68389	8.52238
sp|O14980|XPO1_HUMAN	O14980	9.41264	10.1291	9.26862	9.66346	9.47572	12.115	13.5326	12.6277	12.9382	11.8662	10.9969	12.3379	11.1529	10.8135	10.7156	5.8978	7.22283	9.36654	10.8473	10.3198	10.9907	9.75855	1.12626	0.184805	0.311973		sp|O14980|XPO1_HUMAN	XPO1	Exportin-1 OS=Homo sapiens OX=9606 GN=XPO1 PE=1 SV=1	55	45	8.64917	9.65552	9.00672	9.15998	9.17044	10.731	12.3379	10.8885	10.1402	10.2605	11.2423	12.2581	11.7926	11.7846	10.5419	5.87695	7.0441
sp|O14981|BTAF1_HUMAN	O14981	12.4168	11.0344	10.2298	12.1442	9.64303	7.0035	8.18902	9.83117	9.45146	9.71611	10.5835	9.55238	9.50647	9.53986	9.58733	16.1329	12.5583	10.3837	11.42	10.6663	9.83865	10.846	1.10238	0.214549	0.345249		sp|O14981|BTAF1_HUMAN	BTAF1	TATA-binding protein-associated factor 172 OS=Homo sapiens OX=9606 GN=BTAF1 PE=1 SV=2	4	3	11.4097	10.5185	9.94079	11.5115	9.33236	10.3276	9.55238	9.28109	8.94585	9.18013	6.49898	7.41776	9.181	8.60873	8.6318	16.0759	12.2475
sp|O14983|AT2A1_HUMAN	O14983	17.8699	10.0873	12.4678	8.33434	8.70254	22.3691	7.08991	8.76662	7.34356	7.15247	10.8724	11.57	9.92947	7.04868	7.35518	13.4264	12.5423	8.01155	10.458	8.46529	10.1758	9.74637	1.04406	0.760273	0.837115		sp|O14983|AT2A1_HUMAN	ATP2A1	Sarcoplasmic/endoplasmic reticulum calcium ATPase 1 OS=Homo sapiens OX=9606 GN=ATP2A1 PE=1 SV=1	7	4	16.4204	9.61567	12.1155	7.90011	8.42217	10.6095	11.57	9.69406	6.60979	7.04278	20.7577	6.42217	8.18685	6.68878	6.35426	13.3789	12.2319
sp|O14986|PI51B_HUMAN	O14986	9.39942	9.6332	7.80083	8.12585	9.28305						11.6003	10.799	12.9752	10.706	13.6679						8.81687	11.8921	1.34879	0.00173248	0.0118485		sp|O14986|PI51B_HUMAN	PIP5K1B	Phosphatidylinositol 4-phosphate 5-kinase type-1 beta OS=Homo sapiens OX=9606 GN=PIP5K1B PE=1 SV=2	1	0	8.63702	9.18283	7.58041	7.70248	8.98398	11.3198	10.799	12.6676	10.0394	13.0874	0	0	0	0	0	0	0
sp|O15013|ARHGA_HUMAN	O15013	7.53122	8.20748	9.76001	18.3919	9.35951	7.72225	10.1031	9.99663	10.609	13.6994	12.5883	9.24939	11.592	9.81604	7.54506	11.5103	13.2822	9.98131	9.44123	9.66332	10.1644	10.336	1.01688	0.877046	0.920219		sp|O15013|ARHGA_HUMAN	ARHGEF10	Rho guanine nucleotide exchange factor 10 OS=Homo sapiens OX=9606 GN=ARHGEF10 PE=1 SV=4	7	10	6.92035	7.82377	9.48423	17.4337	9.05797	12.2839	9.24939	11.3172	9.20484	7.2246	7.16596	9.15155	9.33551	9.66305	12.1706	11.4696	12.9535
sp|O15018|PDZD2_HUMAN	O15018	11.8434	11.8058	10.683	9.61507	7.36397	13.0151	9.12263	10.369	11.7207	8.18929	9.91838	13.9339	11.3203	10.3408	7.18535	11.5559	8.95795	12.24	10.306	10.3287	10.2255	10.46	1.02293	0.781637	0.850894		sp|O15018|PDZD2_HUMAN	PDZD2	PDZ domain-containing protein 2 OS=Homo sapiens OX=9606 GN=PDZD2 PE=1 SV=4	3	3	10.8828	11.2539	10.3811	9.11411	7.12672	9.67852	13.9339	11.0519	9.69694	6.88017	12.0775	8.26344	9.6833	10.6756	7.27537	11.515	8.73629
sp|O15020|SPTN2_HUMAN	O15020	9.60022	10.32	9.85878	9.30015	7.30142	9.84122	9.98647	12.5144	14.0451	9.31855	10.2119	13.388	11.8923	12.1299	9.96418	8.84269	7.65859	10.8767	11.4163	11.6726	10.0657	10.679	1.06093	0.447537	0.579915		sp|O15020|SPTN2_HUMAN	SPTBN2	Spectrin beta chain, non-erythrocytic 2 OS=Homo sapiens OX=9606 GN=SPTBN2 PE=1 SV=3	93	97	8.82153	9.83752	9.58021	8.8156	7.06619	9.96492	13.388	11.6104	11.3746	9.54097	9.13228	9.04593	11.6868	12.7928	8.27861	8.81143	7.46908
sp|O15027|SC16A_HUMAN	O15027	10.4722	10.8356	10.4657	10.7	10.4038	8.47859	9.42571	12.9505	12.8066	10.1637	9.20939	10.8024	9.74014	11.8783	9.63957	10.1357	9.5945	11.6578	10.4031	10.3858	10.5941	10.3115	1.0274	0.576682	0.693276		sp|O15027|SC16A_HUMAN	SEC16A	Protein transport protein Sec16A OS=Homo sapiens OX=9606 GN=SEC16A PE=1 SV=4	19	9	9.62282	10.329	10.17	10.1425	10.0686	8.98668	10.8024	9.50922	11.1387	9.23015	7.86781	8.53798	12.094	11.6647	9.02944	10.0999	9.35709
sp|O15031|PLXB2_HUMAN	O15031	10.9002	10.6708	11.5459	10.3365	11.0182	11.6494	10.1289	10.5213	10.6562	10.0879	9.69397	10.3846	10.2847	9.85822	9.40101	9.05001	10.3532	10.8477	11.0586	11.6659	10.7396	10.2323	1.04958	0.112829	0.217397		sp|O15031|PLXB2_HUMAN	PLXNB2	Plexin-B2 OS=Homo sapiens OX=9606 GN=PLXNB2 PE=1 SV=3	58	62	10.0161	10.1719	11.2197	9.79792	10.6632	9.45954	10.3846	10.0409	9.24439	9.00172	10.8102	9.17491	9.82547	9.70607	8.96208	9.01801	10.097
sp|O15037|KHNYN_HUMAN	O15037						6.81534	5.32494	9.50746	6.61202	6.48985						20.821	16.0907	13.2796	8.78078	10.7557	6.82476	13.3256	1.95254	0.00562685	0.0266784		sp|O15037|KHNYN_HUMAN	KHNYN	Protein KHNYN OS=Homo sapiens OX=9606 GN=KHNYN PE=1 SV=3	0	1	0	0	0	0	0	0	0	0	0	0	6.32438	4.82343	8.87869	6.02246	5.76559	20.7474	15.6925
sp|O15040|TCPR2_HUMAN	O15040	7.99278	9.83935	9.2263	9.48216	7.86049	11.7216	12.3795	13.33	13.9253	8.0142	9.93799	15.5323	12.6168	10.3979	10.8792	5.23358	6.48148	10.3349	12.0062	13.0363	10.156	10.1915	1.00349	0.968254	0.978975		sp|O15040|TCPR2_HUMAN	TECPR2	Tectonin beta-propeller repeat-containing protein 2 OS=Homo sapiens OX=9606 GN=TECPR2 PE=1 SV=4	4	4	7.34447	9.37934	8.9656	8.98813	7.60725	9.69766	15.5323	12.3177	9.75049	10.4171	10.8772	11.2136	12.4484	12.6837	7.11982	5.21508	6.3211
sp|O15042|SR140_HUMAN	O15042	11.4255	12.7159	12.5347	11.2519	12.3261	13.1427	11.3771	11.0633	10.9015	9.99733	8.66321	8.79254	8.61853	8.9775	8.90375	9.41066	8.55393	10.3789	10.4757	10.8808	11.6369	9.32984	1.24727	2.40596e-05	0.000837622	1	sp|O15042|SR140_HUMAN	U2SURP	U2 snRNP-associated SURP motif-containing protein OS=Homo sapiens OX=9606 GN=U2SURP PE=1 SV=2	12	10	10.4988	12.1214	12.1805	10.6657	11.929	8.45371	8.79254	8.4142	8.41851	8.52558	12.1959	10.3056	10.3316	9.92943	8.88164	9.37739	8.34226
sp|O15047|SET1A_HUMAN	O15047	9.57832	9.95092	12.7421	9.3412	10.5275	18.3693	6.3077	7.50244	7.5871	11.6585	8.9161	8.66842	9.75379	7.78999	16.8054	11.6723	13.7869	12.0429	7.8446	8.93311	9.91518	10.2972	1.03853	0.771254	0.845034		sp|O15047|SET1A_HUMAN	SETD1A	Histone-lysine N-methyltransferase SETD1A OS=Homo sapiens OX=9606 GN=SETD1A PE=1 SV=3	4	1	8.80141	9.4857	12.3821	8.85451	10.1883	8.70048	8.66842	9.52254	7.30494	16.0916	17.046	5.71363	7.00627	6.9106	10.3574	11.631	13.4457
sp|O15056|SYNJ2_HUMAN	O15056	8.198	8.78528	9.95471	10.4397	8.60303	8.01026	10.3579	8.45884	5.63798	6.5752	12.9062	11.3146	11.2799	11.637	10.8234	17.765	12.5385	14.9995	10.1961	10.3273	8.36391	12.199	1.45853	0.000246757	0.0032355	3	sp|O15056|SYNJ2_HUMAN	SYNJ2	Synaptojanin-2 OS=Homo sapiens OX=9606 GN=SYNJ2 PE=1 SV=3	3	2	7.53305	8.37455	9.67343	9.89577	8.32586	12.5941	11.3146	11.0125	10.9124	10.3637	7.43322	9.38238	7.89942	5.13527	5.84141	17.7022	12.2282
sp|O15061|SYNEM_HUMAN	O15061	8.72824	8.11079	9.0469	7.92217	9.07118	7.96475	8.40919	11.2356	10.2713	7.23662	10.8001	17.0754	11.4588	9.44817	12.0177	18.9537	9.0133	10.1472	11.2059	10.8089	8.73108	11.7551	1.34635	0.00312537	0.0177291	3	sp|O15061|SYNEM_HUMAN	SYNM	Synemin OS=Homo sapiens OX=9606 GN=SYNM PE=1 SV=2	35	46	8.02028	7.7316	8.79127	7.50941	8.77893	10.5389	17.0754	11.1871	8.85987	11.5073	7.39099	7.6172	10.4925	9.3555	6.42902	18.8867	8.79027
sp|O15066|KIF3B_HUMAN	O15066	9.82432	9.01267	10.8901	9.57635	9.15822	18.1719	7.01172	8.19531	8.39587	8.31002	11.2481	10.5174	11.9097	11.3415	10.5503	11.1295	11.275	11.9177	10.3848	10.8343	9.52721	11.0989	1.16497	0.0843468	0.17764		sp|O15066|KIF3B_HUMAN	KIF3B	Kinesin-like protein KIF3B OS=Homo sapiens OX=9606 GN=KIF3B PE=1 SV=1	3	4	9.02745	8.59131	10.5824	9.07741	8.86317	10.9761	10.5174	11.6273	10.6353	10.1022	16.8628	6.35134	7.65332	7.64726	7.38263	11.0902	10.996
sp|O15067|PUR4_HUMAN	O15067	10.0042	10.4451	10.539	10.2197	9.45021	9.38776	9.74702	10.6777	10.5828	10.4248	10.699	11.1321	10.8604	10.6742	10.0167	10.7125	10.2302	11.7572	10.8395	11.5045	10.1376	10.8312	1.06842	0.00632453	0.0286914		sp|O15067|PUR4_HUMAN	PFAS	Phosphoribosylformylglycinamidine synthase OS=Homo sapiens OX=9606 GN=PFAS PE=1 SV=4	16	22	9.19274	9.95682	10.2412	9.68727	9.14575	10.4403	11.1321	10.6029	10.0096	9.59126	8.71149	8.82903	9.9715	9.63917	9.26143	10.6746	9.97706
sp|O15068|MCF2L_HUMAN	O15068	11.0023	11.7582	11.5989	11.134	8.54022	9.88632	10.5428	12.3416	11.6037	9.15688	9.1653	11.1971	9.52578	10.2415	9.97034	8.55584	6.36306	11.4265	12.0587	14.1548	10.6907	10.0584	1.06287	0.449862	0.581935		sp|O15068|MCF2L_HUMAN	MCF2L	Guanine nucleotide exchange factor DBS OS=Homo sapiens OX=9606 GN=MCF2L PE=1 SV=2	4	1	10.1099	11.2085	11.2712	10.5539	8.26508	8.94366	11.1971	9.29994	9.6038	9.54687	9.17413	9.54983	11.5254	10.5691	8.13498	8.52559	6.20561
sp|O15075|DCLK1_HUMAN	O15075	10.9056	8.88804	9.52365	13.6696	7.94659	8.4095	8.74323	9.3513	8.84724	11.3298	13.2544	9.42858	12.8713	9.5812	8.03185	18.6908	15.8585	8.04754	8.09655	8.01863	9.63727	10.6724	1.10741	0.373002	0.512453		sp|O15075|DCLK1_HUMAN	DCLK1	Serine/threonine-protein kinase DCLK1 OS=Homo sapiens OX=9606 GN=DCLK1 PE=1 SV=2	21	18	10.021	8.47251	9.25455	12.9574	7.69057	12.9339	9.42858	12.5661	8.98462	7.69071	7.8037	7.91978	8.73286	8.05838	10.0654	18.6247	15.4661
sp|O15084|ANR28_HUMAN	O15084	9.70798	10.1886	8.84044	9.88152	9.73546	12.4046	10.5031	12.5443	12.577	9.23262	11.4827	12.3205	10.8079	11.1234	9.90055	10.1633	8.54518	8.66522	10.5816	10.9721	10.4789	10.3937	1.0082	0.883804	0.923767		sp|O15084|ANR28_HUMAN	ANKRD28	Serine/threonine-protein phosphatase 6 regulatory ankyrin repeat subunit A OS=Homo sapiens OX=9606 GN=ANKRD28 PE=1 SV=5	8	8	8.92055	9.71224	8.59064	9.36668	9.42181	11.205	12.3205	10.5517	10.4308	9.48004	11.511	9.51394	11.7147	11.4556	8.20227	10.1274	8.33373
sp|O15085|ARHGB_HUMAN	O15085	9.15872	10.0306	10.9244	10.4172	9.70647	11.3376	13.0991	11.0525	11.7013	10.6421	10.8607	11.3583	11.2687	9.91538	10.3211	8.89744	9.01045	9.03207	10.8572	10.7225	10.7569	10.1833	1.05632	0.228093	0.36146		sp|O15085|ARHGB_HUMAN	ARHGEF11	Rho guanine nucleotide exchange factor 11 OS=Homo sapiens OX=9606 GN=ARHGEF11 PE=1 SV=1	3	4	8.41584	9.5617	10.6157	9.87447	9.39375	10.5981	11.3583	11.0015	9.29799	9.88269	10.5209	11.8654	10.3216	10.658	9.45449	8.86598	8.78749
sp|O15091|MRPP3_HUMAN	O15091	10.4339	10.5794	10.5406	10.1566	11.5757	10.1692	7.12113	7.32236	8.21576	5.79353	9.42131	9.63314	10.6003	10.6834	10.5071	19.1545	14.1836	12.3532	8.47092	11.9938	8.99114	11.3923	1.26706	0.0343676	0.0922574	3	sp|O15091|MRPP3_HUMAN	PRORP	Mitochondrial ribonuclease P catalytic subunit OS=Homo sapiens OX=9606 GN=PRORP PE=1 SV=2	3	1	9.58761	10.0848	10.2428	9.6274	11.2028	9.19347	9.63314	10.349	10.0182	10.0608	9.43661	6.45045	6.8381	7.48321	5.14698	19.0868	13.8326
sp|O15111|IKKA_HUMAN	O15111	9.86341	9.72996	9.9055	8.85984	9.65674	12.0714	12.6577	12.2094	11.8215	11.5147	11.7727	10.2619	11.8667	11.4288	10.6938	6.51992	8.50502	9.28591	11.4193	10.5441	10.7523	10.0831	1.06636	0.37984	0.519547		sp|O15111|IKKA_HUMAN	CHUK	Inhibitor of nuclear factor kappa-B kinase subunit alpha OS=Homo sapiens OX=9606 GN=CHUK PE=1 SV=2	11	6	9.06337	9.27507	9.62561	8.39823	9.34563	11.488	10.2619	11.5854	10.7172	10.2396	11.2018	11.4656	11.4019	10.7674	10.2297	6.49687	8.29456
sp|O15116|LSM1_HUMAN	O15116	7.39649	8.63563	10.5947	8.11202	8.22508	9.67709	10.3394	8.48539	7.48408	10.1704	14.1315	12.4633	12.8516	9.41336	11.9051	14.9615	14.497	10.9944	9.58152	9.25789	8.8411	11.8294	1.338	0.000713045	0.00640225	3	sp|O15116|LSM1_HUMAN	LSM1	U6 snRNA-associated Sm-like protein LSm1 OS=Homo sapiens OX=9606 GN=LSM1 PE=1 SV=1	2	3	6.79655	8.2319	10.2953	7.68937	7.96009	13.7898	12.4633	12.5469	8.82723	11.3995	8.97997	9.36562	7.92422	6.81677	9.03536	14.9086	14.1383
sp|O15118|NPC1_HUMAN	O15118	9.87382	10.1135	9.32153	10.0356	8.86647	11.6275	12.6953	12.0855	13.5226	10.1994	8.11358	10.4941	8.75185	8.82769	19.7392	9.44795	7.10125	9.09871	10.4321	10.2225	10.7379	9.83335	1.09199	0.384366	0.523329		sp|O15118|NPC1_HUMAN	NPC1	NPC intracellular cholesterol transporter 1 OS=Homo sapiens OX=9606 GN=NPC1 PE=1 SV=2	24	23	9.07294	9.64064	9.05814	9.5127	8.58082	7.91737	10.4941	8.54436	8.27803	18.9008	10.7899	11.4996	11.2862	12.3169	9.06117	9.41455	6.92553
sp|O15120|PLCB_HUMAN	O15120	12.0776	10.8278	11.5857	9.92466	10.9468						9.77178	9.52604	10.0011	8.82582	10.672						11.0481	9.74062	1.13423	0.0243937	0.072297		sp|O15120|PLCB_HUMAN	AGPAT2	1-acyl-sn-glycerol-3-phosphate acyltransferase beta OS=Homo sapiens OX=9606 GN=AGPAT2 PE=1 SV=1	2	0	11.098	10.3216	11.2583	9.40757	10.5941	9.53547	9.52604	9.76396	8.27627	10.2187	0	0	0	0	0	0	0
sp|O15121|DEGS1_HUMAN	O15121	11.9773	9.33338	10.0279	10.1672	8.30385	10.4634	9.7988	9.00152	8.85663	12.4937	11.5919	9.0944	11.4227	10.6154	11.6617	12.9238	12.4035	10.2524	9.64809	9.9898	9.966	10.8972	1.09344	0.118066	0.224698		sp|O15121|DEGS1_HUMAN	DEGS1	Sphingolipid delta(4)-desaturase DES1 OS=Homo sapiens OX=9606 GN=DEGS1 PE=1 SV=1	6	5	11.0058	8.89703	9.74457	9.63744	8.03632	11.3116	9.0944	11.1519	9.95442	11.1664	9.70967	8.87593	8.40621	8.06693	11.0994	12.8781	12.0966
sp|O15126|SCAM1_HUMAN	O15126	10.992	12.5221	13.0449	10.8325	7.55623	9.99725	8.40867	10.1642	11.094	7.08933	7.354	12.3671	10.1814	10.6133	8.63686	10.3537	9.3108	13.9024	12.7909	12.449	9.98758	10.6121	1.06253	0.50816	0.634574		sp|O15126|SCAM1_HUMAN	SCAMP1	Secretory carrier-associated membrane protein 1 OS=Homo sapiens OX=9606 GN=SCAMP1 PE=1 SV=2	9	8	10.1004	11.9367	12.6763	10.2681	7.31279	7.17616	12.3671	9.94005	9.95242	8.27003	9.27707	7.61673	9.49201	10.1048	6.29817	10.3171	9.08041
sp|O15127|SCAM2_HUMAN	O15127	15.9919	10.1839	7.88161	13.8645	12.5213	8.83286	9.93217	9.1443	8.34075	9.07802	6.79316	8.05172	6.50871	12.2414	10.6153	15.1332	11.9227	12.7971	9.72961	10.4624	10.3074	10.0841	1.02214	0.854569	0.905532		sp|O15127|SCAM2_HUMAN	SCAMP2	Secretory carrier-associated membrane protein 2 OS=Homo sapiens OX=9606 GN=SCAMP2 PE=1 SV=2	5	2	14.6948	9.7078	7.6589	13.1421	12.1179	6.62888	8.05172	6.3544	11.4792	10.1644	8.19656	8.99674	8.53955	7.59705	8.06492	15.0797	11.6277
sp|O15143|ARC1B_HUMAN	O15143	10.1536	10.8621	8.64918	9.32281	8.21937	8.04857	13.1045	12.9647	12.817	15.2454	10.2622	8.21283	10.7133	17.5302	10.4377	8.68831	9.71027	7.34751	9.87497	8.92268	10.6923	9.8978	1.08027	0.462045	0.593456		sp|O15143|ARC1B_HUMAN	ARPC1B	Actin-related protein 2/3 complex subunit 1B OS=Homo sapiens OX=9606 GN=ARPC1B PE=1 SV=3	20	20	9.32999	10.3543	8.40479	8.83708	7.95456	10.014	8.21283	10.4593	16.4387	9.99438	7.46877	11.8703	12.1073	11.6742	13.544	8.65759	9.46999
sp|O15144|ARPC2_HUMAN	O15144	7.96	8.40686	8.89106	8.42373	7.61775	12.0141	16.0518	12.494	13.0131	12.3544	14.2646	13.2376	13.2285	11.6338	10.1232	6.46159	8.07445	8.10563	9.31345	9.0125	10.3991	10.0434	1.03541	0.767716	0.842372		sp|O15144|ARPC2_HUMAN	ARPC2	Actin-related protein 2/3 complex subunit 2 OS=Homo sapiens OX=9606 GN=ARPC2 PE=1 SV=1	39	43	7.31435	8.01383	8.63983	7.98484	7.37233	13.9196	13.2376	12.9149	10.9094	9.69328	11.1486	14.54	11.6677	11.8528	10.9757	6.43875	7.87465
sp|O15145|ARPC3_HUMAN	O15145	9.33317	9.56037	8.3441	10.735	9.06788	5.92614	11.5401	12.975	12.3735	11.3413	10.2246	10.0958	10.0713	15.647	11.1458	8.76133	8.97495	12.0175	11.145	11.1059	9.8979	10.7807	1.08919	0.353701	0.493107		sp|O15145|ARPC3_HUMAN	ARPC3	Actin-related protein 2/3 complex subunit 3 OS=Homo sapiens OX=9606 GN=ARPC3 PE=1 SV=3	14	18	8.57614	9.11341	8.10833	10.1757	8.77574	9.97731	10.0958	9.83251	14.6727	10.6724	5.49923	10.4532	12.1169	11.2702	10.0756	8.73035	8.75287
sp|O15155|BET1_HUMAN	O15155	14.7995	11.6709	13.4742	15.2248	10.4708	7.66476	6.15641	8.87257	9.18318	9.55159	6.13239	7.52786	6.89088	8.91638	9.41625	9.75687	10.8254	18.8657	10.7115	13.6949	10.3142	9.75546	1.05727	0.696698	0.786695		sp|O15155|BET1_HUMAN	BET1	BET1 homolog OS=Homo sapiens OX=9606 GN=BET1 PE=1 SV=1	5	6	13.5991	11.1253	13.0935	14.4316	10.1335	5.98409	7.52786	6.72751	8.36119	9.01631	7.11261	5.57659	8.28579	8.36437	8.48564	9.72237	10.5575
sp|O15160|RPAC1_HUMAN	O15160	12.2271	11.8587	11.1634	10.4074	9.13683	10.7509	10.4258	11.7467	11.9799	9.67705	10.1019	10.4682	10.599	10.1284	8.07657	9.57115	9.65943	12.0079	9.8592	10.3549	10.8917	10.0385	1.085	0.0799116	0.170232		sp|O15160|RPAC1_HUMAN	POLR1C	DNA-directed RNA polymerases I and III subunit RPAC1 OS=Homo sapiens OX=9606 GN=POLR1C PE=1 SV=1	6	5	11.2353	11.3043	10.848	9.86515	8.84247	9.85759	10.4682	10.3477	9.49772	7.73353	9.97647	9.44391	10.9698	10.9117	8.5971	9.53731	9.42041
sp|O15164|TIF1A_HUMAN	O15164	10.0275	11.4756	12.5628	10.9446	10.4992	15.2285	15.1479	13.0569	14.4753	10.5959	9.32042	11.032	9.36245	9.6785	9.14888	6.52582	6.57339	7.96303	9.22558	8.14065	12.2603	8.58976	1.42732	0.000124348	0.0022095	2	sp|O15164|TIF1A_HUMAN	TRIM24	Transcription intermediary factor 1-alpha OS=Homo sapiens OX=9606 GN=TRIM24 PE=1 SV=3	3	2	9.21418	10.9391	12.2078	10.3744	10.1609	9.09502	11.032	9.14048	9.07586	8.7603	14.1315	13.7212	12.1934	13.1846	9.41338	6.50275	6.41073
sp|O15173|PGRC2_HUMAN	O15173	10.7866	10.6519	12.4433	10.7179	11.379	16.2388	11.0804	9.75837	10.1685	10.2438	9.55511	10.0929	9.57594	8.76915	10.1113	9.61147	11.0567	9.55366	9.1569	9.30849	11.2296	9.66142	1.16232	0.00807123	0.0336707		sp|O15173|PGRC2_HUMAN	PGRMC2	Membrane-associated progesterone receptor component 2 OS=Homo sapiens OX=9606 GN=PGRMC2 PE=1 SV=1	36	29	9.91168	10.1539	12.0917	10.1595	11.0124	9.32404	10.0929	9.34891	8.22313	9.68184	15.069	10.0368	9.11301	9.26179	9.10057	9.57749	10.7831
sp|O15182|CETN3_HUMAN	O15182	8.82268	10.9752	10.9938	10.3245	10.2814	14.1056	9.89826	9.4236	8.46202	7.51125	10.4865	12.2437	10.2492	9.6255	9.92345	9.46159	10.6399	13.2105	12.44	10.5286	9.9436	10.8152	1.08765	0.217417	0.348903		sp|O15182|CETN3_HUMAN	CETN3	Centrin-3 OS=Homo sapiens OX=9606 GN=CETN3 PE=1 SV=2	3	2	8.10706	10.4621	10.6832	9.78658	9.95015	10.2329	12.2437	10.0062	9.02616	9.50197	13.0895	8.96602	8.80038	7.70751	6.673	9.42814	10.3766
sp|O15194|CTDSL_HUMAN	O15194	8.95093	9.17085	9.99426	8.23724	6.34273						13.6843	13.3278	12.6185	10.3084	11.1826						8.44145	12.1547	1.43988	0.00471747	0.0234486		sp|O15194|CTDSL_HUMAN	CTDSPL	CTD small phosphatase-like protein OS=Homo sapiens OX=9606 GN=CTDSPL PE=1 SV=2	1	0	8.22491	8.7421	9.71186	7.80807	6.13838	13.3534	13.3278	12.3193	9.66658	10.7076	0	0	0	0	0	0	0
sp|O15205|UBD_HUMAN	O15205						17.8658	9.59794	13.5712	14.0773	8.26574						2.41578	4.84902	12.6184	11.8771	11.4816	12.2046	7.25915	1.68127	0.180332	0.306191		sp|O15205|UBD_HUMAN	UBD	Ubiquitin D OS=Homo sapiens OX=9606 GN=UBD PE=1 SV=2	0	1	0	0	0	0	0	0	0	0	0	0	16.5788	8.69399	12.6737	12.8221	7.34329	2.40724	4.72903
sp|O15211|RGL2_HUMAN	O15211	11.3425	9.70561	9.17342	10.5522	11.9293	9.38796	7.91624	9.18379	8.6403	8.10034	9.84521	9.84376	9.70117	9.9277	12.1484	13.4483	12.9621	12.3395	11.2833	12.0273	9.51342	11.2715	1.1848	0.0096934	0.0379209		sp|O15211|RGL2_HUMAN	RGL2	Ral guanine nucleotide dissociation stimulator-like 2 OS=Homo sapiens OX=9606 GN=RGL2 PE=1 SV=1	2	4	10.4225	9.25186	8.91421	10.0024	11.545	9.60712	9.84376	9.47117	9.30954	11.6324	8.71167	7.17067	8.57643	7.86989	7.19635	13.4008	12.6414
sp|O15212|PFD6_HUMAN	O15212						4.25973	5.23498	4.44097	4.62299	5.04617						15.6964	17.6969	15.5399	16.259	15.3989	4.70687	16.097	3.4199	3.69517e-09	1.40509e-05		sp|O15212|PFD6_HUMAN	PFDN6	Prefoldin subunit 6 OS=Homo sapiens OX=9606 GN=PFDN6 PE=1 SV=1	0	3	0	0	0	0	0	0	0	0	0	0	3.95287	4.74194	4.14727	4.21078	4.48302	15.6409	17.259
sp|O15213|WDR46_HUMAN	O15213	11.4177	10.3951	11.3469	8.89066	11.0066	11.584	10.2783	9.6866	9.90005	10.0011	13.924	8.86342	12.4371	8.24791	7.4841	8.6566	10.046	12.9046	10.8532	12.0187	10.4172	10.3325	1.00819	0.920208	0.946468		sp|O15213|WDR46_HUMAN	WDR46	WD repeat-containing protein 46 OS=Homo sapiens OX=9606 GN=WDR46 PE=1 SV=3	1	1	10.4916	9.90913	11.0263	8.42744	10.652	13.5873	8.86342	12.1422	7.73435	7.16623	10.7495	9.31031	9.04599	9.01732	8.88498	8.62599	9.79737
sp|O15217|GSTA4_HUMAN	O15217	9.65125	9.95636	10.3409	9.97743	9.34193	10.2523	10.9767	13.263	13.5586	12.889	10.6079	12.2122	10.4869	11.7624	9.67241	5.55426	9.35283	9.22553	10.554	11.0093	10.9221	9.85109	1.10872	0.227573	0.361013		sp|O15217|GSTA4_HUMAN	GSTA4	Glutathione S-transferase A4 OS=Homo sapiens OX=9606 GN=GSTA4 PE=1 SV=1	6	4	8.86842	9.49088	10.0487	9.45759	9.04096	10.3514	12.2122	10.2383	11.03	9.26159	9.51376	9.94288	12.3859	12.3497	11.4506	5.53462	9.1214
sp|O15226|NKRF_HUMAN	O15226	10.001	11.3145	12.0076	10.8592	10.9313	8.53141	7.36094	7.57658	8.20022	10.5417	9.68644	10.1937	10.3459	9.60982	9.11309	22.2494	13.1164	11.3152	7.94101	8.17795	9.5979	10.6732	1.11204	0.343793	0.482431		sp|O15226|NKRF_HUMAN	NKRF	NF-kappa-B-repressing factor OS=Homo sapiens OX=9606 GN=NKRF PE=1 SV=2	6	1	9.18979	10.7855	11.6683	10.2934	10.5791	9.45219	10.1937	10.1006	9.01146	8.72603	7.91683	6.66767	7.07551	7.46905	9.36523	22.1707	12.7918
sp|O15228|GNPAT_HUMAN	O15228	10.8685	11.0859	11.0699	11.399	9.87628	11.8772	9.2914	10.9333	10.7322	11.795	9.40614	10.3695	10.1535	10.1018	9.80817	10.1969	10.3372	10.0068	10.8584	10.0657	10.8654	10.124	1.07323	0.0161903	0.0544569		sp|O15228|GNPAT_HUMAN	GNPAT	Dihydroxyacetone phosphate acyltransferase OS=Homo sapiens OX=9606 GN=GNPAT PE=1 SV=1	15	10	9.98695	10.5676	10.7571	10.8051	9.55809	9.17867	10.3695	9.91276	9.47276	9.39159	11.0216	8.41632	10.2102	9.77524	10.4787	10.1608	10.0814
sp|O15229|KMO_HUMAN	O15229	12.4671	11.0699	12.8223	11.196	15.5773	30.354	10.189	8.11003	6.83398	13.6342	7.81512	7.49541	7.00421	8.85502	10.0053	6.09683	6.36494	6.52368	12.297	6.51691	12.1846	7.70502	1.58138	0.00594865	0.0276345	2	sp|O15229|KMO_HUMAN	KMO	Kynurenine 3-monooxygenase OS=Homo sapiens OX=9606 GN=KMO PE=1 SV=2	7	1	11.4559	10.5524	12.46	10.6127	15.0754	7.62613	7.49541	6.83815	8.30365	9.58033	28.1674	9.22936	7.57368	6.22463	12.1126	6.07527	6.20744
sp|O15230|LAMA5_HUMAN	O15230	12.5677	12.9918	12.0639	11.6197	11.41	16.4459	12.2878	12.3863	13.4954	11.8801	8.30525	7.89722	9.41567	8.80873	9.22512	8.41028	7.09613	7.2858	8.84246	8.64465	12.6484	8.36025	1.51293	2.83886e-08	3.59825e-05	2	sp|O15230|LAMA5_HUMAN	LAMA5	Laminin subunit alpha-5 OS=Homo sapiens OX=9606 GN=LAMA5 PE=1 SV=8	83	60	11.5483	12.3844	11.723	11.0143	11.0424	8.1044	7.89722	9.19244	8.26025	8.8333	15.2612	11.1305	11.5671	12.2921	10.5543	8.38055	6.92054
sp|O15231|ZN185_HUMAN	O15231	9.28137	12.8903	12.6549	10.4867	13.1599	11.6003	7.59535	10.8007	8.70681	9.11298	9.7367	9.45324	8.53551	11.5259	6.38553	9.58338	3.34142	23.1454	11.3045	10.3209	10.4665	9.33034	1.12177	0.508697	0.63514		sp|O15231|ZN185_HUMAN	ZNF185	Zinc finger protein 185 OS=Homo sapiens OX=9606 GN=ZNF185 PE=1 SV=3	6	2	8.52854	12.2877	12.2973	9.94035	12.7359	9.50124	9.45324	8.33315	10.8082	6.11432	10.7646	6.88001	10.0864	7.93047	8.09598	9.5495	3.25874
sp|O15235|RT12_HUMAN	O15235						10.1291	8.91713	7.62919	5.95517	8.86093						21.3402	13.1223	10.6504	9.48124	8.88472	8.16827	12.0231	1.47193	0.0677163	0.151242		sp|O15235|RT12_HUMAN	MRPS12	28S ribosomal protein S12, mitochondrial OS=Homo sapiens OX=9606 GN=MRPS12 PE=1 SV=1	0	1	0	0	0	0	0	0	0	0	0	0	9.39946	8.0773	7.12464	5.42418	7.87206	21.2648	12.7976
sp|O15243|OBRG_HUMAN	O15243	8.30897	9.7876	9.0909	5.58274	16.5311						10.5837	12.1451	14.8548	9.08522	7.74442						9.26394	10.6083	1.14512	0.537412	0.65982		sp|O15243|OBRG_HUMAN	LEPROT	Leptin receptor gene-related protein OS=Homo sapiens OX=9606 GN=LEPROT PE=1 SV=1	1	0	7.63502	9.33001	8.83402	5.29187	15.9985	10.3278	12.1451	14.5026	8.51952	7.41549	0	0	0	0	0	0	0
sp|O15247|CLIC2_HUMAN	O15247						2.71393	4.64637	6.6538	5.78549	11.6227						8.45928	45.5246	6.86416	5.97137	6.45466	5.62711	10.0374	1.78376	0.240298	0.376022		sp|O15247|CLIC2_HUMAN	CLIC2	Chloride intracellular channel protein 2 OS=Homo sapiens OX=9606 GN=CLIC2 PE=1 SV=3	0	6	0	0	0	0	0	0	0	0	0	0	2.51842	4.20877	6.21376	5.26963	10.3256	8.42937	44.3981
sp|O15254|ACOX3_HUMAN	O15254	11.5712	12.4238	10.8451	12.1051	10.5212	11.3334	10.7735	10.3027	10.1212	8.93973	9.01667	9.6937	8.56019	9.14639	10.342	11.5992	10.3054	11.0406	10.5334	10.8725	10.8496	10.0676	1.07767	0.101471	0.20233		sp|O15254|ACOX3_HUMAN	ACOX3	Peroxisomal acyl-coenzyme A oxidase 3 OS=Homo sapiens OX=9606 GN=ACOX3 PE=1 SV=2	8	5	10.6326	11.843	10.5387	11.4744	10.1822	8.79862	9.6937	8.35724	8.57688	9.90271	10.517	9.75886	9.62134	9.21871	7.94206	11.5582	10.0504
sp|O15258|RER1_HUMAN	O15258	9.81759	10.9143	10.3171	10.4039	9.16607	15.4244	14.3215	14.8344	16.2879	10.0979	10.8293	13.1909	11.5721	9.54702	8.15431	3.29267	5.33	8.84779	9.38918	9.29612	11.8973	8.39765	1.41675	0.0272725	0.0781476	2	sp|O15258|RER1_HUMAN	RER1	Protein RER1 OS=Homo sapiens OX=9606 GN=RER1 PE=1 SV=1	8	8	9.02127	10.404	10.0256	9.86185	8.87076	10.5674	13.1909	11.2977	8.95257	7.80797	14.3133	12.9727	13.8533	14.8356	8.97095	3.28103	5.19811
sp|O15260|SURF4_HUMAN	O15260	9.04583	11.8451	9.81763	11.2275	10.4552	11.8341	12.4258	12.674	12.6094	11.7131	11.177	11.467	11.0495	9.66884	8.21647	7.513	8.11573	8.48002	10.5733	10.6413	11.3015	9.58499	1.17908	0.01488	0.051388		sp|O15260|SURF4_HUMAN	SURF4	Surfeit locus protein 4 OS=Homo sapiens OX=9606 GN=SURF4 PE=1 SV=3	7	10	8.31211	11.2913	9.54022	10.6425	10.1184	10.9067	11.467	10.7875	9.0668	7.86749	10.9816	11.2555	11.8358	11.4851	10.4059	7.48644	7.91491
sp|O15269|SPTC1_HUMAN	O15269	10.0821	11.6959	11.2292	11.5528	10.7684	12.7818	11.2348	11.381	11.9017	11.001	9.80838	10.7731	10.4639	9.51737	8.1642	9.40741	9.71152	9.93823	9.08089	9.84237	11.3427	9.64574	1.17592	6.28966e-05	0.00150892		sp|O15269|SPTC1_HUMAN	SPTLC1	Serine palmitoyltransferase 1 OS=Homo sapiens OX=9606 GN=SPTLC1 PE=1 SV=1	11	15	9.2643	11.1491	10.9119	10.9509	10.4215	9.57118	10.7731	10.2158	8.92476	7.81744	11.861	10.1767	10.6283	10.8405	9.7733	9.37415	9.47121
sp|O15270|SPTC2_HUMAN	O15270	10.1976	10.8351	11.5141	9.45326	8.99271	11.5742	10.6355	13.2731	13.0409	9.63827	10.9128	13.0251	12.1856	8.80532	7.95876	8.80696	7.83852	10.3902	10.9498	10.1176	10.8307	9.96397	1.08698	0.241748	0.377437		sp|O15270|SPTC2_HUMAN	SPTLC2	Serine palmitoyltransferase 2 OS=Homo sapiens OX=9606 GN=SPTLC2 PE=1 SV=1	7	8	9.37044	10.3285	11.1888	8.96073	8.70299	10.6489	13.0251	11.8967	8.25705	7.62073	10.7404	9.63381	12.3953	11.8781	8.56265	8.77582	7.64456
sp|O15294|OGT1_HUMAN	O15294	11.4498	11.2813	11.5522	11.3445	11.6434	11.6757	10.8347	10.293	10.5039	10.9604	9.06441	9.07364	8.67106	9.73727	10.4042	9.16854	10.5095	10.7886	10.776	10.5916	11.1442	9.84715	1.13172	0.000645558	0.00602388		sp|O15294|OGT1_HUMAN	OGT	UDP-N-acetylglucosamine--peptide N-acetylglucosaminyltransferase 110 kDa subunit OS=Homo sapiens OX=9606 GN=OGT PE=1 SV=3	24	23	10.5211	10.7539	11.2258	10.7534	11.2683	8.84521	9.07364	8.46548	9.13097	9.96229	10.8346	9.81428	9.61224	9.56735	9.73726	9.13612	10.2494
sp|O15305|PMM2_HUMAN	O15305	7.68692	8.1294	8.38595	8.49302	7.69424	6.55289	12.087	13.338	13.9374	12.4084	13.4754	15.0332	14.5114	13.1331	7.18083	7.19254	9.61638	11.4739	9.56189	10.2677	9.54186	10.8006	1.13192	0.320036	0.458913		sp|O15305|PMM2_HUMAN	PMM2	Phosphomannomutase 2 OS=Homo sapiens OX=9606 GN=PMM2 PE=1 SV=1	4	3	7.06342	7.74934	8.14899	8.05052	7.44635	13.1495	15.0332	14.1674	12.3154	6.87584	6.08083	10.9486	12.4559	12.6947	11.0236	7.16711	9.37842
sp|O15327|INP4B_HUMAN	O15327	10.7009	8.26793	8.63889	5.61193	9.4025	10.2377	15.3993	14.2489	9.29374	15.2648	13.6116	8.84077	10.3521	13.0026	15.7164	5.36574	6.20598	7.79492	13.1783	9.97994	10.2542	9.86064	1.03991	0.800096	0.865292		sp|O15327|INP4B_HUMAN	INPP4B	Inositol polyphosphate 4-phosphatase type II OS=Homo sapiens OX=9606 GN=INPP4B PE=1 SV=4	3	4	9.83289	7.88139	8.39479	5.31954	9.09958	13.2824	8.84077	10.1067	12.193	15.0489	9.50024	13.949	13.3066	8.46507	13.5613	5.34677	6.05241
sp|O15344|TRI18_HUMAN	O15344	9.37121	8.7855	10.2182	8.87445	10.3126	10.1189	11.1939	9.90026	7.63364	8.97012	13.9038	9.48726	12.5308	9.91683	10.5526	12.6546	15.1189	10.7443	10.5986	8.62139	9.48797	11.2506	1.18578	0.0185087	0.0596434		sp|O15344|TRI18_HUMAN	MID1	E3 ubiquitin-protein ligase Midline-1 OS=Homo sapiens OX=9606 GN=MID1 PE=1 SV=1	5	4	8.6111	8.37476	9.92947	8.41208	9.98036	13.5676	9.48726	12.2337	9.29935	10.1044	9.38994	10.1396	9.24552	6.95299	7.96906	12.6099	14.7448
sp|O15347|HMGB3_HUMAN	O15347	13.1782	12.2956	13.1036	13.369	10.5247	16.2515	10.4588	9.38454	9.26773	10.8595	8.37045	8.03887	8.32228	9.37395	7.78717	9.52628	9.00171	10.4109	10.597	10.398	11.6974	9.12926	1.2813	0.00166379	0.0115977	1	sp|O15347|HMGB3_HUMAN	HMGB3	High mobility group protein B3 OS=Homo sapiens OX=9606 GN=HMGB3 PE=1 SV=4	11	9	12.1093	11.7208	12.7333	12.6725	10.1856	8.16803	8.03887	8.12497	8.79027	7.45643	15.0808	9.47379	8.7639	8.44138	9.64758	9.4926	8.77896
sp|O15355|PPM1G_HUMAN	O15355	9.83751	9.52382	11.0745	8.85227	8.51303	7.65211	8.43335	8.74021	8.51263	9.85845	11.6791	11.8007	11.5458	10.6048	10.5234	16.3149	13.0522	12.3614	10.0142	10.3139	9.05386	11.7052	1.29284	0.000256366	0.00332605	3	sp|O15355|PPM1G_HUMAN	PPM1G	Protein phosphatase 1G OS=Homo sapiens OX=9606 GN=PPM1G PE=1 SV=1	12	7	9.03957	9.07857	10.7616	8.39105	8.23876	11.3967	11.8007	11.2721	9.9445	10.0764	7.10087	7.63908	8.16219	7.75361	8.75826	16.2572	12.7292
sp|O15357|SHIP2_HUMAN	O15357	12.061	11.2835	11.3375	11.2023	11.0212	7.87731	7.94874	11.8502	11.613	10.3869	7.61864	8.98351	8.23608	11.5789	11.0106	7.97677	9.9225	11.6924	13.0669	13.5829	10.548	10.1673	1.03745	0.664087	0.764167		sp|O15357|SHIP2_HUMAN	INPPL1	Phosphatidylinositol 3,4,5-trisphosphate 5-phosphatase 2 OS=Homo sapiens OX=9606 GN=INPPL1 PE=1 SV=2	16	18	11.0827	10.756	11.0171	10.6186	10.6661	7.4344	8.98351	8.04082	10.8579	10.5429	7.30985	7.20011	11.0665	10.5775	9.22769	7.94857	9.67697
sp|O15371|EIF3D_HUMAN	O15371	9.57277	9.93252	10.3656	9.42307	10.0749	9.91188	10.0915	12.0645	12.2185	11.1618	10.0315	11.4492	11.1903	11.0801	10.8896	9.53276	10.052	11.4173	9.57898	10.0959	10.4412	10.5076	1.00636	0.866553	0.9139		sp|O15371|EIF3D_HUMAN	EIF3D	Eukaryotic translation initiation factor 3 subunit D OS=Homo sapiens OX=9606 GN=EIF3D PE=1 SV=1	34	42	8.79631	9.46816	10.0727	8.93211	9.75034	9.7889	11.4492	10.925	10.3902	10.4271	9.19785	9.14103	11.2666	11.129	9.91616	9.49906	9.80326
sp|O15372|EIF3H_HUMAN	O15372	9.28856	8.31988	8.93435	7.66999	8.04702	11.556	12.0076	11.2486	11.2538	9.65922	12.9218	13.3296	14.0901	11.8423	9.39306	10.0254	10.023	9.89745	10.2261	10.2272	9.68091	11.0876	1.14531	0.0671849	0.150233		sp|O15372|EIF3H_HUMAN	EIF3H	Eukaryotic translation initiation factor 3 subunit H OS=Homo sapiens OX=9606 GN=EIF3H PE=1 SV=1	10	17	8.53515	7.93091	8.6819	7.27037	7.78777	12.6093	13.3296	13.756	11.1049	8.99411	10.7235	10.8767	10.5047	10.2504	8.58126	9.98995	9.77501
sp|O15379|HDAC3_HUMAN	O15379	13.2343	12.4363	12.2429	11.286	13.6339	8.8249	8.63886	10.4928	10.7496	12.3698	6.93565	7.95304	7.20072	9.68699	9.775	10.0879	9.07592	13.0694	10.4746	12.1588	11.2674	9.45862	1.19124	0.0479027	0.116773		sp|O15379|HDAC3_HUMAN	HDAC3	Histone deacetylase 3 OS=Homo sapiens OX=9606 GN=HDAC3 PE=1 SV=2	2	2	12.1608	11.8549	11.897	10.698	13.1947	6.76793	7.95304	7.03	9.08382	9.35983	8.18917	7.82524	9.79891	9.79112	10.9893	10.0522	8.85134
sp|O15381|NVL_HUMAN	O15381	10.0321	11.9584	10.8864	11.0824	9.72204						10.4887	9.61243	8.28516	8.23545	13.8176						10.707	9.89909	1.08161	0.468429	0.599025		sp|O15381|NVL_HUMAN	NVL	Nuclear valosin-containing protein-like OS=Homo sapiens OX=9606 GN=NVL PE=1 SV=1	2	0	9.21838	11.3993	10.5788	10.505	9.40882	10.2351	9.61243	8.08873	7.72266	13.2307	0	0	0	0	0	0	0
sp|O15382|BCAT2_HUMAN	O15382	13.5891	10.2158	12.0881	10.7263	14.3246	20.4947	11.5127	8.86897	8.78994	11.0878	9.90379	8.64792	9.2087	6.74142	8.74495	7.04677	8.12294	7.38869	12.6246	10.5857	11.8056	8.7491	1.34935	0.00801854	0.0335768	2	sp|O15382|BCAT2_HUMAN	BCAT2	Branched-chain-amino-acid aminotransferase, mitochondrial OS=Homo sapiens OX=9606 GN=BCAT2 PE=1 SV=2	20	18	12.4869	9.73824	11.7465	10.1674	13.8631	9.66429	8.64792	8.99038	6.32166	8.37353	19.0183	10.4284	8.28243	8.00619	9.85042	7.02186	7.92194
sp|O15394|NCAM2_HUMAN	O15394	11.1709	11.0835	11.5218	11.8822	11.6915	18.2171	17.7142	10.2318	10.6859	8.922	10.3871	10.05	9.94046	8.88484	7.49177	10.179	8.14863	8.06701	7.45504	6.98517	12.009	8.67247	1.38473	0.0014043	0.0102887	2	sp|O15394|NCAM2_HUMAN	NCAM2	Neural cell adhesion molecule 2 OS=Homo sapiens OX=9606 GN=NCAM2 PE=1 SV=2	6	5	10.2648	10.5653	11.1962	11.2631	11.3148	10.1359	10.05	9.70479	8.33162	7.17357	16.9048	16.0458	9.5551	9.73313	7.92631	10.143	7.94699
sp|O15397|IPO8_HUMAN	O15397	9.84905	9.24858	9.5053	9.41444	10.9123	9.17376	8.37429	8.76944	7.45728	10.369	10.8668	9.32218	11.9955	10.4602	12.4968	19.455	15.7492	8.02205	9.50376	8.34503	9.25961	11.1966	1.20919	0.0599569	0.137456		sp|O15397|IPO8_HUMAN	IPO8	Importin-8 OS=Homo sapiens OX=9606 GN=IPO8 PE=1 SV=2	3	3	9.05018	8.81619	9.23671	8.92393	10.5607	10.604	9.32218	11.7111	9.80891	11.966	8.5129	7.58558	8.18948	6.79236	9.21182	19.3862	15.3595
sp|O15400|STX7_HUMAN	O15400	11.1582	10.2306	10.1856	10.9632	10.7334	12.0457	9.34344	7.51953	8.33794	8.82303	10.4609	9.92248	9.39154	10.4247	10.6967	16.2156	9.48196	10.3789	11.6287	11.6732	9.84093	10.8942	1.10703	0.153131	0.271599		sp|O15400|STX7_HUMAN	STX7	Syntaxin-7 OS=Homo sapiens OX=9606 GN=STX7 PE=1 SV=4	17	12	10.2531	9.75227	9.89782	10.392	10.3876	10.2079	9.92248	9.16888	9.77562	10.2424	11.178	8.46346	7.02223	7.59449	7.83839	16.1583	9.24733
sp|O15427|MOT4_HUMAN	O15427	9.39456	11.3648	8.79057	9.77668	5.86613	13.2885	10.5729	11.8804	11.643	6.69514	10.2893	20.5891	13.1673	8.49531	5.84455	6.15935	6.47609	11.7659	14.0151	13.6029	9.65011	10.2168	1.05872	0.707138	0.79508		sp|O15427|MOT4_HUMAN	SLC16A3	Monocarboxylate transporter 4 OS=Homo sapiens OX=9606 GN=SLC16A3 PE=1 SV=1	9	16	8.63255	10.8335	8.54218	9.2673	5.67714	10.0405	20.5891	12.8551	7.96634	5.59631	12.3312	9.5771	11.0947	10.6049	5.94797	6.13757	6.31584
sp|O15431|COPT1_HUMAN	O15431	13.1375	13.5758	12.6144	14.2932	9.93514	5.07973	5.73427	12.1659	12.7102	11.3189	4.55456	5.49471	6.29368	12.1875	12.5879	11.0448	10.8558	13.9765	10.829	11.9212	10.4999	9.37194	1.12036	0.511096	0.636689		sp|O15431|COPT1_HUMAN	SLC31A1	High affinity copper uptake protein 1 OS=Homo sapiens OX=9606 GN=SLC31A1 PE=1 SV=1	3	4	12.0719	12.9411	12.258	13.5485	9.61506	4.44442	5.49471	6.14447	11.4286	12.0533	4.7138	5.19421	11.3613	11.5769	10.0557	11.0058	10.5872
sp|O15439|MRP4_HUMAN	O15439	10.1259	11.47	12.2055	12.2927	11.445	15.5847	11.4151	9.89949	10.2137	11.7888	8.72169	9.18403	8.39997	8.965	11.3524	9.28755	11.307	8.42488	9.3519	9.05717	11.5512	9.3546	1.23481	0.000980806	0.0079267	2	sp|O15439|MRP4_HUMAN	ABCC4	Multidrug resistance-associated protein 4 OS=Homo sapiens OX=9606 GN=ABCC4 PE=1 SV=3	24	12	9.30454	10.9338	11.8606	11.6522	11.0763	8.51077	9.18403	8.20082	8.40679	10.8702	14.462	10.34	9.2448	9.30299	10.4732	9.25471	11.0272
sp|O15440|MRP5_HUMAN	O15440	9.67771	11.4235	10.7428	10.3432	8.52312	10.4038	11.7635	16.3216	16.6269	7.0255	8.91465	12.7367	10.1239	10.7787	10.7554	4.16601	5.5314	13.086	9.89789	11.6877	10.9343	9.26263	1.18048	0.264799	0.401022		sp|O15440|MRP5_HUMAN	ABCC5	Multidrug resistance-associated protein 5 OS=Homo sapiens OX=9606 GN=ABCC5 PE=1 SV=2	5	4	8.89274	10.8894	10.4392	9.80435	8.24853	8.69907	12.7367	9.88388	10.1076	10.2986	9.65429	10.6556	15.2422	15.1444	6.24146	4.15128	5.39453
sp|O15446|RPA34_HUMAN	O15446	10.8663	12.9871	12.3075	12.1033	11.6284	12.1739	9.52608	7.87037	7.8635	9.30757	7.17691	9.78968	8.74225	9.40656	9.19042	5.64335	9.83047	16.0536	12.6622	14.8275	10.5026	9.88179	1.06283	0.614063	0.724023		sp|O15446|RPA34_HUMAN	CD3EAP	DNA-directed RNA polymerase I subunit RPA34 OS=Homo sapiens OX=9606 GN=CD3EAP PE=1 SV=1	1	3	9.98495	12.3799	11.9597	11.4727	11.2538	7.00335	9.78968	8.53499	8.82085	8.80008	11.2969	8.6289	7.34987	7.16236	8.26885	5.6234	9.58722
sp|O15455|TLR3_HUMAN	O15455	8.41763	9.68319	9.3666	9.71889	11.6386	10.2343	14.7508	9.65838	9.68472	8.09319	11.1034	13.1873	11.395	8.79657	10.507	8.41746	10.765	10.7983	10.3898	13.2382	9.98686	10.7575	1.07716	0.308079	0.4467		sp|O15455|TLR3_HUMAN	TLR3	Toll-like receptor 3 OS=Homo sapiens OX=9606 GN=TLR3 PE=1 SV=1	3	2	7.73486	9.23049	9.10193	9.21252	11.2636	10.8349	13.1873	11.1248	8.24884	10.0607	9.497	13.3615	9.01963	8.82119	7.19	8.3877	10.4986
sp|O15460|P4HA2_HUMAN	O15460	10.3413	12.2292	9.09644	13.9382	14.4262	8.0718	12.1414	7.1332	7.69677	17.0357	9.70876	5.33578	10.0767	11.5708	7.65434	11.8338	23.9711	5.14547	7.42031	5.62186	10.7805	8.80946	1.22374	0.272698	0.409219		sp|O15460|P4HA2_HUMAN	P4HA2	Prolyl 4-hydroxylase subunit alpha-2 OS=Homo sapiens OX=9606 GN=P4HA2 PE=1 SV=1	28	34	9.5025	11.6575	8.83941	13.212	13.9614	9.47397	5.33578	9.83784	10.8503	7.32924	7.49033	10.9979	6.66145	7.01049	15.1345	11.792	23.3779
sp|O15484|CAN5_HUMAN	O15484	9.6643	9.69973	10.4139	11.3919	12.6291	11.39	12.3932	8.74834	11.1287	11.1624	9.43032	8.83865	8.5381	9.11586	14.4209	12.2102	9.46954	10.0019	10.1046	9.49088	10.7978	10.037	1.0758	0.26064	0.397148		sp|O15484|CAN5_HUMAN	CAPN5	Calpain-5 OS=Homo sapiens OX=9606 GN=CAPN5 PE=1 SV=2	7	1	8.88041	9.24625	10.1196	10.7984	12.2222	9.20227	8.83865	8.33568	8.54825	13.8084	10.5695	11.226	8.16978	10.1364	9.91666	12.167	9.23522
sp|O15488|GLYG2_HUMAN	O15488						15.7354	16.6957	9.38675	10.9081	16.2077						4.07646	8.49323	5.64351	10.1707	9.98002	13.4244	7.23565	1.85531	0.0194692	0.0618735		sp|O15488|GLYG2_HUMAN	GYG2	Glycogenin-2 OS=Homo sapiens OX=9606 GN=GYG2 PE=1 SV=2	0	1	0	0	0	0	0	0	0	0	0	0	14.6019	15.1233	8.76597	9.93546	14.3989	4.06205	8.28307
sp|O15498|YKT6_HUMAN	O15498	7.83971	7.88439	8.55122	8.10612	7.75581	8.42984	13.0227	11.3472	11.7744	11.5873	12.9239	14.8206	14.0477	13.2353	8.58789	10.5615	10.4624	9.46478	9.69173	9.88867	9.44467	11.1854	1.1843	0.0718904	0.157513		sp|O15498|YKT6_HUMAN	YKT6	Synaptobrevin homolog YKT6 OS=Homo sapiens OX=9606 GN=YKT6 PE=1 SV=1	12	14	7.20382	7.51578	8.30959	7.68378	7.50594	12.6114	14.8206	13.7147	12.4112	8.22314	7.82257	11.7962	10.5968	10.7245	10.2942	10.5242	10.2035
sp|O15504|NUP42_HUMAN	O15504	12.5848	12.372	13.9129	12.5038	11.294	9.63023	6.51683	9.35084	9.92249	8.23459	6.46553	10.1326	8.2414	8.75998	7.9769	12.8082	12.979	10.7126	11.6194	13.5911	10.3905	10.0594	1.03292	0.766011	0.841268		sp|O15504|NUP42_HUMAN	NUP42	Nucleoporin NUP42 OS=Homo sapiens OX=9606 GN=NUP42 PE=1 SV=1	2	1	11.564	11.7936	13.5198	11.8523	10.9301	6.30917	10.1326	8.04601	8.21453	7.6381	8.93649	5.90306	8.73243	9.03776	7.31562	12.7629	12.6578
sp|O15511|ARPC5_HUMAN	O15511	8.11923	9.11469	8.15734	9.09457	8.01864	8.41833	10.1099	10.118	10.1528	9.97184	14.2037	12.208	12.8448	11.9228	10.1867	12.807	11.228	10.9587	10.4271	11.511	9.08682	11.7733	1.29564	2.02234e-05	0.000792777	3	sp|O15511|ARPC5_HUMAN	ARPC5	Actin-related protein 2/3 complex subunit 5 OS=Homo sapiens OX=9606 GN=ARPC5 PE=1 SV=3	18	23	7.46067	8.68856	7.92684	8.62073	7.7603	13.8602	12.208	12.5403	11.1804	9.75406	7.81189	9.15771	9.44887	9.24757	8.85899	12.7617	10.9502
sp|O15514|RPB4_HUMAN	O15514						7.87163	6.62928	8.1268	6.98663	6.61356						21.2242	13.0533	12.6577	11.2563	10.214	7.21823	13.216	1.83092	0.00206745	0.0133132		sp|O15514|RPB4_HUMAN	POLR2D	DNA-directed RNA polymerase II subunit RPB4 OS=Homo sapiens OX=9606 GN=POLR2D PE=1 SV=1	0	2	0	0	0	0	0	0	0	0	0	0	7.30458	6.00492	7.58934	6.36367	5.87549	21.1492	12.7303
sp|O15523|DDX3Y_HUMAN	O15523	10.6984	10.9599	11.2805	9.77712	11.8576	9.46529	9.70688	12.7826	9.85886	11.1959	9.55365	9.16849	9.42085	10.4991	10.9477	15.1488	11.9976	9.08291	8.42824	8.12415	10.7112	10.0699	1.06369	0.370034	0.509433		sp|O15523|DDX3Y_HUMAN	DDX3Y	ATP-dependent RNA helicase DDX3Y OS=Homo sapiens OX=9606 GN=DDX3Y PE=1 SV=2	5	2	9.8306	10.4475	10.9618	9.26772	11.4756	9.32261	9.16849	9.1975	9.8454	10.4827	8.78343	8.79267	11.9372	8.9798	9.94643	15.0952	11.7007
sp|O15530|PDPK1_HUMAN	O15530	8.81255	9.59444	9.14063	9.9181	10.5	11.0914	12.181	12.1176	12.1519	11.4071	11.2386	12.2472	10.6441	11.0461	10.8059	9.5304	9.93028	8.37482	9.7299	9.85737	10.6209	10.2888	1.03228	0.540766	0.66207		sp|O15530|PDPK1_HUMAN	PDPK1	3-phosphoinositide-dependent protein kinase 1 OS=Homo sapiens OX=9606 GN=PDPK1 PE=1 SV=1	6	10	8.09775	9.14588	8.88235	9.40135	10.1617	10.9668	12.2472	10.3917	10.3583	10.3469	10.2924	11.0338	11.3162	11.0684	10.1341	9.49671	9.68456
sp|O15533|TPSN_HUMAN	O15533	13.3152	11.2065	9.37739	10.2838	9.71169	14.7643	13.082	13.441	12.3316	14.3799	9.30208	9.01185	9.24479	11.262	11.642	5.18656	6.63361	6.21281	11.4524	9.60232	12.046	8.66587	1.39006	0.00461191	0.0230871	2	sp|O15533|TPSN_HUMAN	TAPBP	Tapasin OS=Homo sapiens OX=9606 GN=TAPBP PE=1 SV=1	5	5	12.2352	10.6826	9.11242	9.74804	9.39881	9.07713	9.01185	9.02561	10.5608	11.1475	13.7007	11.8499	12.5521	11.2321	12.7751	5.16822	6.46946
sp|O15540|FABP7_HUMAN	O15540	14.9506	5.30088	16.5104	10.4178	18.9068	6.9067	2.55867	3.53138	3.26052	5.09383	5.77485	6.45275	5.97835	12.5443	7.62876	67.942	3.59183	2.95003	3.24101	3.42213	6.961	6.6543	1.04609	0.91558	0.943495		sp|O15540|FABP7_HUMAN	FABP7	Fatty acid-binding protein, brain OS=Homo sapiens OX=9606 GN=FABP7 PE=1 SV=3	5	12	13.7379	5.05306	16.0439	9.87499	18.2977	5.6352	6.45275	5.83661	11.7632	7.30474	6.40916	2.31769	3.29784	2.9698	4.52536	67.7018	3.50295
sp|O43143|DHX15_HUMAN	O43143	10.5054	10.8775	11.3113	10.1826	11.7737	13.742	10.6635	11.2056	10.0238	10.765	10.1386	10.2001	10.0752	9.27472	9.7255	7.44235	9.46805	10.9056	11.0985	10.9138	11.0628	9.86713	1.12118	0.0241757	0.0718023		sp|O43143|DHX15_HUMAN	DHX15	Pre-mRNA-splicing factor ATP-dependent RNA helicase DHX15 OS=Homo sapiens OX=9606 GN=DHX15 PE=1 SV=2	59	45	9.65332	10.369	10.9917	9.65204	11.3944	9.89338	10.2001	9.83633	8.69722	9.31243	12.7521	9.65915	10.4645	9.13006	9.56367	7.41604	9.23376
sp|O43148|MCES_HUMAN	O43148	10.1728	11.4768	11.2162	10.247	11.0588	12.2118	10.5666	9.75508	8.75914	9.24883	10.1345	9.69261	9.72261	9.8015	10.5812	8.89229	9.61119	12.0911	12.2678	12.4735	10.4229	10.4589	1.00345	0.944182	0.961889		sp|O43148|MCES_HUMAN	RNMT	mRNA cap guanine-N7 methyltransferase OS=Homo sapiens OX=9606 GN=RNMT PE=1 SV=1	17	17	9.34766	10.9402	10.8993	9.71312	10.7025	9.88939	9.69261	9.4921	9.1912	10.1318	11.3321	9.57138	9.10994	7.97814	8.21667	8.86085	9.37336
sp|O43149|ZZEF1_HUMAN	O43149	10.9327	9.61006	10.8879	8.90007	9.67044	8.36533	9.76597	11.1772	11.5871	9.26985	10.3764	13.2463	11.5802	9.68013	9.04727	9.78084	10.6261	11.483	11.9144	11.8807	9.96508	10.8943	1.09324	0.0926266	0.189413		sp|O43149|ZZEF1_HUMAN	ZZEF1	Zinc finger ZZ-type and EF-hand domain-containing protein 1 OS=Homo sapiens OX=9606 GN=ZZEF1 PE=1 SV=6	26	23	10.0459	9.16077	10.5802	8.43636	9.35888	10.1255	13.2463	11.3057	9.07739	8.66301	7.76271	8.84619	10.438	10.5539	8.23534	9.74626	10.3632
sp|O43150|ASAP2_HUMAN	O43150	8.8566	8.16805	8.7792	7.60298	10.404	5.52093	7.05533	7.37336	9.8894	7.55134	12.327	10.8653	12.1815	11.0684	13.684	18.1796	16.5722	12.5404	10.9742	9.17968	8.00279	12.5123	1.56349	6.5906e-05	0.0015141	3	sp|O43150|ASAP2_HUMAN	ASAP2	Arf-GAP with SH3 domain, ANK repeat and PH domain-containing protein 2 OS=Homo sapiens OX=9606 GN=ASAP2 PE=1 SV=3	8	3	8.13823	7.78618	8.53113	7.20685	10.0688	12.0289	10.8653	11.8927	10.3792	13.1028	5.12321	6.39085	6.88573	9.00762	6.70862	18.1153	16.1621
sp|O43155|FLRT2_HUMAN	O43155	9.03329	11.2663	10.0675	11.7885	11.8534	7.22229	12.6423	10.8092	10.3664	11.2503	10.336	12.1068	10.5581	8.88994	8.03524	8.17054	15.0571	11.0888	9.44908	9.97989	10.5122	10.1959	1.03102	0.703789	0.79263		sp|O43155|FLRT2_HUMAN	FLRT2	Leucine-rich repeat transmembrane protein FLRT2 OS=Homo sapiens OX=9606 GN=FLRT2 PE=1 SV=1	2	6	8.30059	10.7396	9.78304	11.1743	11.4715	10.086	12.1068	10.3078	8.3364	7.69396	6.70201	11.4516	10.0943	9.4421	9.99482	8.14165	14.6845
sp|O43157|PLXB1_HUMAN	O43157	11.4581	11.4287	11.6366	11.1207	11.2041	13.4698	9.37587	11.1634	10.6395	8.93384	8.68041	10.1178	9.13248	9.94686	9.45453	12.1789	9.04255	10.2216	10.3278	10.5259	10.9789	9.92025	1.10671	0.0461978	0.113553		sp|O43157|PLXB1_HUMAN	PLXNB1	Plexin-B1 OS=Homo sapiens OX=9606 GN=PLXNB1 PE=1 SV=3	35	13	10.5287	10.8944	11.3078	10.5413	10.8431	8.47049	10.1178	8.91596	9.32751	9.05297	12.4995	8.49283	10.4251	9.69085	7.93683	12.1358	8.81879
sp|O43159|RRP8_HUMAN	O43159	12.9944	10.0659	11.3212	10.6275	9.7543						9.55285	8.60487	9.15378	11.1553	11.0963						10.895	9.85887	1.10509	0.207332	0.337348		sp|O43159|RRP8_HUMAN	RRP8	Ribosomal RNA-processing protein 8 OS=Homo sapiens OX=9606 GN=RRP8 PE=1 SV=2	2	0	11.9404	9.59535	11.0013	10.0738	9.44004	9.32183	8.60487	8.93676	10.4607	10.625	0	0	0	0	0	0	0
sp|O43164|PJA2_HUMAN	O43164	10.0634	8.46846	10.2447	8.94295	8.41469	11.498	12.6685	11.9802	8.53648	10.5815	13.3463	10.1501	12.7153	10.1909	11.4468	15.6531	11.8411	9.48625	5.65371	7.95406	10.0351	10.4738	1.04372	0.671771	0.7694		sp|O43164|PJA2_HUMAN	PJA2	E3 ubiquitin-protein ligase Praja-2 OS=Homo sapiens OX=9606 GN=PJA2 PE=1 SV=4	3	1	9.24711	8.07255	9.95526	8.47701	8.14359	13.0235	10.1501	12.4138	9.55636	10.9606	10.6697	11.4754	11.1879	7.77533	9.4006	15.5978	11.5481
sp|O43166|SI1L1_HUMAN	O43166	6.40082	7.18609	17.0648	7.06899	7.50242						11.932	14.3723	11.964	10.2672	9.81705						8.39224	11.5641	1.37795	0.136831	0.249127		sp|O43166|SI1L1_HUMAN	SIPA1L1	Signal-induced proliferation-associated 1-like protein 1 OS=Homo sapiens OX=9606 GN=SIPA1L1 PE=1 SV=4	2	0	5.88164	6.85013	16.5826	6.70069	7.26071	11.6434	14.3723	11.6804	9.62795	9.40009	0	0	0	0	0	0	0
sp|O43169|CYB5B_HUMAN	O43169	13.7509	8.24973	8.28753	7.90294	8.31341	21.6779	15.3735	9.03796	9.88552	13.2464	12.2448	7.92314	12.4506	13.5394	11.6829	8.1593	7.97693	6.42072	7.92821	7.25228	10.9313	9.25106	1.18163	0.240753	0.37649		sp|O43169|CYB5B_HUMAN	CYB5B	Cytochrome b5 type B OS=Homo sapiens OX=9606 GN=CYB5B PE=1 SV=3	19	10	12.6355	7.86404	8.05335	7.49119	8.04557	11.9487	7.92314	12.1554	12.6964	11.1867	20.1163	13.9256	8.44024	9.00408	11.7681	8.13045	7.77954
sp|O43172|PRP4_HUMAN	O43172	17.1768	9.34923	9.9099	10.1906	9.98473	12.2184	8.59032	9.59302	9.39201	11.5751	7.8032	7.91435	8.82001	12.0267	11.4191	11.0328	11.1349	10.47	11.1583	10.7269	10.5891	10.1422	1.04406	0.596059	0.710395		sp|O43172|PRP4_HUMAN	PRPF4	U4/U6 small nuclear ribonucleoprotein Prp4 OS=Homo sapiens OX=9606 GN=PRPF4 PE=1 SV=2	10	11	15.7836	8.91214	9.62988	9.65967	9.66305	7.6145	7.91435	8.6109	11.2778	10.9341	11.3382	7.78127	8.9586	8.55458	10.2833	10.9938	10.8594
sp|O43175|SERA_HUMAN	O43175	9.04614	10.0074	9.16328	10.0816	8.00222	8.09828	11.1542	10.6391	10.9783	11.6956	12.4309	11.8895	11.4175	11.8081	10.1339	11.6599	12.7821	9.13616	9.29491	10.5522	9.81041	11.0429	1.12564	0.0484733	0.117626		sp|O43175|SERA_HUMAN	PHGDH	D-3-phosphoglycerate dehydrogenase OS=Homo sapiens OX=9606 GN=PHGDH PE=1 SV=4	53	54	8.31239	9.53951	8.90436	9.55633	7.74441	12.1303	11.8895	11.1468	11.0729	9.7035	7.5149	10.1037	9.93553	9.99943	10.3904	11.6187	12.4658
sp|O43181|NDUS4_HUMAN	O43181	10.7657	12.2664	13.3253	11.483	10.7281	21.6749	12.8842	8.67744	10.251	10.5466	9.78458	10.4031	9.25202	8.11095	7.94646	7.06292	6.14441	10.8967	9.93746	8.52699	11.8968	8.68164	1.37034	0.00433801	0.0220378	2	sp|O43181|NDUS4_HUMAN	NDUFS4	NADH dehydrogenase [ubiquinone] iron-sulfur protein 4, mitochondrial OS=Homo sapiens OX=9606 GN=NDUFS4 PE=1 SV=1	7	6	9.89248	11.6929	12.9488	10.8847	10.3825	9.54796	10.4031	9.03267	7.60591	7.60895	20.1135	11.6707	8.10357	9.33695	9.3696	7.03795	5.99237
sp|O43186|CRX_HUMAN	O43186	18.0004	15.3349	19.9416	15.0036	10.0274	8.04643	7.27888	9.05857	8.52036	6.68189	2.73861	3.4156	2.66794	9.44541	8.34161	5.16616	7.62781	24.2653	12.612	15.9701	10.9602	7.20824	1.52051	0.145454	0.260769		sp|O43186|CRX_HUMAN	CRX	Cone-rod homeobox protein OS=Homo sapiens OX=9606 GN=CRX PE=1 SV=1	1	2	16.5404	14.618	19.3781	14.2219	9.70431	2.67238	3.4156	2.60469	8.85728	7.98732	7.46678	6.59334	8.45949	7.76065	5.9362	5.1479	7.43906
sp|O43189|PHF1_HUMAN	O43189	9.65436	10.5107	9.95586	10.3095	9.4605						10.4337	8.97967	9.85095	10.7895	14.2144						9.9705	10.7197	1.07514	0.387954	0.526574		sp|O43189|PHF1_HUMAN	PHF1	PHD finger protein 1 OS=Homo sapiens OX=9606 GN=PHF1 PE=1 SV=3	1	0	8.87128	10.0193	9.67454	9.77234	9.15571	10.1814	8.97967	9.6174	10.1177	13.6107	0	0	0	0	0	0	0
sp|O43236|SEPT4_HUMAN	O43236	11.3141	12.4461	11.602	13.5973	10.1522	6.94151	8.69075	13.4321	12.9649	10.6706	6.91669	9.26102	6.94747	12.4077	9.73639	7.61783	9.06451	12.446	12.0778	12.1583	10.9719	9.61953	1.14059	0.208517	0.338406		sp|O43236|SEPT4_HUMAN	SEPTIN4	Septin-4 OS=Homo sapiens OX=9606 GN=SEPTIN4 PE=1 SV=1	5	8	10.3964	11.8642	11.2742	12.8889	9.82513	6.74942	9.26102	6.78276	11.6351	9.32286	6.44146	7.87224	12.5438	11.8089	9.47981	7.5909	8.84021
sp|O43237|DC1L2_HUMAN	O43237	9.40599	9.37956	9.58352	10.4821	10.1864	9.34233	11.3531	9.62535	9.84236	12.7438	12.5181	10.0045	11.0678	11.3588	10.0594	12.5538	12.322	9.60499	9.0964	9.51143	10.146	10.7368	1.05823	0.273683	0.410282		sp|O43237|DC1L2_HUMAN	DYNC1LI2	Cytoplasmic dynein 1 light intermediate chain 2 OS=Homo sapiens OX=9606 GN=DYNC1LI2 PE=1 SV=1	15	20	8.64306	8.94105	9.31272	9.936	9.85823	12.2154	10.0045	10.8054	10.6515	9.63211	8.66933	10.2838	8.98879	8.96477	11.3216	12.5094	12.0171
sp|O43242|PSMD3_HUMAN	O43242	10.0236	10.7707	10.6451	10.4199	9.53096	10.6557	11.3558	11.4137	11.5456	11.1562	10.6487	10.7716	10.6847	11.0949	9.48136	8.13711	10.2863	10.7807	10.5794	10.3267	10.7339	10.2427	1.04796	0.193501	0.321656		sp|O43242|PSMD3_HUMAN	PSMD3	26S proteasome non-ATPase regulatory subunit 3 OS=Homo sapiens OX=9606 GN=PSMD3 PE=1 SV=2	53	48	9.21053	10.2672	10.3443	9.877	9.2239	10.3912	10.7716	10.4314	10.4041	9.07866	9.8881	10.2863	10.6589	10.5161	9.91119	8.10834	10.0318
sp|O43251|RFOX2_HUMAN	O43251	11.9351	12.4387	12.209	12.2951	14.7496	13.6127	11.6324	9.80284	9.1738	12.0087	8.26638	7.55477	8.5604	7.67544	8.57065	9.63804	9.3012	9.67029	10.6888	10.707	11.8845	9.00059	1.32041	0.000171157	0.00269201	1	sp|O43251|RFOX2_HUMAN	RBFOX2	RNA binding protein fox-1 homolog 2 OS=Homo sapiens OX=9606 GN=RBFOX2 PE=1 SV=3	4	2	10.967	11.8572	11.864	11.6545	14.2744	8.06647	7.55477	8.35745	7.19752	8.20663	12.6321	10.5368	9.15454	8.35582	10.6685	9.60396	9.07104
sp|O43252|PAPS1_HUMAN	O43252	9.38606	9.60348	9.53216	9.85678	8.13151	8.49643	11.1636	12.3676	12.3817	11.5586	11.6674	11.2349	11.5932	13.695	9.36215	10.7279	10.645	10.1316	9.33201	9.35262	10.1462	10.7002	1.05461	0.395976	0.53299		sp|O43252|PAPS1_HUMAN	PAPSS1	Bifunctional 3'-phosphoadenosine 5'-phosphosulfate synthase 1 OS=Homo sapiens OX=9606 GN=PAPSS1 PE=1 SV=2	21	22	8.62474	9.1545	9.26282	9.34323	7.86953	11.3852	11.2349	11.3183	12.8423	8.96451	7.88437	10.1122	11.5497	11.2777	10.2687	10.69	10.3816
sp|O43264|ZW10_HUMAN	O43264	9.82658	10.2168	10.4869	9.91196	10.3934	12.5686	11.2565	11.3849	11.8273	10.5608	10.8557	11.5775	11.4028	9.4229	9.86634	9.5626	10.1254	9.2097	9.92164	9.82872	10.8116	10.1483	1.06536	0.092752	0.189552		sp|O43264|ZW10_HUMAN	ZW10	Centromere/kinetochore protein zw10 homolog OS=Homo sapiens OX=9606 GN=ZW10 PE=1 SV=3	16	16	9.02953	9.73916	10.1906	9.39553	10.0586	10.5932	11.5775	11.1325	8.83617	9.44729	11.6632	10.1963	10.632	10.7727	9.38224	9.52879	9.87485
sp|O43272|PROD_HUMAN	O43272	13.2643	11.8351	11.4594	10.7311	14.2037	11.1591	7.15602	11.1906	12.1053	8.61059	7.75564	8.75774	7.75941	9.32371	9.22339	10.5589	8.92401	10.2772	15.0196	10.8089	10.983	9.66678	1.13616	0.163692	0.284934		sp|O43272|PROD_HUMAN	PRODH	Proline dehydrogenase 1, mitochondrial OS=Homo sapiens OX=9606 GN=PRODH PE=1 SV=3	11	11	12.1884	11.2818	11.1356	10.172	13.7461	7.56809	8.75774	7.57545	8.74316	8.83165	10.3552	6.48205	10.4505	11.0259	7.64966	10.5216	8.70319
sp|O43278|SPIT1_HUMAN	O43278	16.9197	14.9073	11.4818	11.4268	13.0684	10.9197	12.2532	11.8663	13.5132	9.17122	6.63407	6.46555	7.90341	9.05216	6.74901	4.99429	7.66457	11.0893	12.5288	12.4272	12.3877	8.19661	1.51132	0.00153451	0.0109577	1	sp|O43278|SPIT1_HUMAN	SPINT1	Kunitz-type protease inhibitor 1 OS=Homo sapiens OX=9606 GN=SPINT1 PE=1 SV=2	2	2	15.5473	14.2104	11.1574	10.8314	12.6474	6.47364	6.46555	7.71603	8.48852	6.46236	10.1331	11.0992	11.0815	12.3083	8.14772	4.97663	7.47491
sp|O43290|SNUT1_HUMAN	O43290	13.1908	12.681	12.7926	12.2385	12.7819	10.3817	8.76881	10.6299	10.122	11.1407	7.64879	7.81157	7.65007	9.02271	8.54695	10.0735	10.8106	12.9899	9.90119	11.0336	11.3832	9.41063	1.20961	0.0148215	0.0512585	1	sp|O43290|SNUT1_HUMAN	SART1	U4/U6.U5 tri-snRNP-associated protein 1 OS=Homo sapiens OX=9606 GN=SART1 PE=1 SV=1	13	10	12.1209	12.0881	12.4311	11.6009	12.3701	7.46382	7.81157	7.4687	8.4609	8.18394	9.63381	7.94295	9.92693	9.21951	9.89743	10.0379	10.5431
sp|O43292|GPAA1_HUMAN	O43292	10.6792	11.6559	10.5645	11.8483	11.4291	15.8858	13.4882	10.9928	11.2538	11.4357	9.85437	10.0763	10.2277	8.80118	8.96822	6.79783	8.11204	9.48542	9.87328	9.31235	11.8365	9.09083	1.30203	0.000155774	0.00252592	2	sp|O43292|GPAA1_HUMAN	GPAA1	Glycosylphosphatidylinositol anchor attachment 1 protein OS=Homo sapiens OX=9606 GN=GPAA1 PE=1 SV=3	8	9	9.81303	11.111	10.266	11.231	11.0609	9.61606	10.0763	9.98524	8.25317	8.58731	14.7414	12.2179	10.2658	10.2504	10.1595	6.7738	7.91131
sp|O43293|DAPK3_HUMAN	O43293	7.85622	8.52188	10.7937	10.3142	8.6479						12.5606	9.83895	13.0453	10.9888	11.3694						9.1591	11.5032	1.25594	0.0197963	0.0625981		sp|O43293|DAPK3_HUMAN	DAPK3	Death-associated protein kinase 3 OS=Homo sapiens OX=9606 GN=DAPK3 PE=1 SV=1	2	0	7.21899	8.12347	10.4887	9.77677	8.36929	12.2568	9.83895	12.736	10.3046	10.8865	0	0	0	0	0	0	0
sp|O43294|TGFI1_HUMAN	O43294	6.1836	9.20025	8.03004	10.1755	7.66505	5.87765	15.4405	9.43505	10.5121	25.3955	12.6231	5.18718	7.01817	11.529	26.6451	11.4194	7.19293	5.42168	9.23078	7.37592	9.7969	9.18642	1.06645	0.764232	0.840004		sp|O43294|TGFI1_HUMAN	TGFB1I1	Transforming growth factor beta-1-induced transcript 1 protein OS=Homo sapiens OX=9606 GN=TGFB1I1 PE=1 SV=2	7	5	5.68204	8.77012	7.80314	9.64531	7.4181	12.3178	5.18718	6.85178	10.8111	25.5134	5.45424	13.9863	8.81107	9.57484	22.5614	11.379	7.01494
sp|O43295|SRGP3_HUMAN	O43295	16.1573	12.812	12.2743	13.9883	12.4682	5.9513	4.90425	10.7277	10.5453	11.103	5.30512	5.57486	6.35351	11.1948	8.59968	13.2942	11.9834	11.4743	10.3298	15.099	10.4972	9.35934	1.12158	0.497229	0.624932		sp|O43295|SRGP3_HUMAN	SRGAP3	SLIT-ROBO Rho GTPase-activating protein 3 OS=Homo sapiens OX=9606 GN=SRGAP3 PE=1 SV=3	4	2	14.8468	12.213	11.9275	13.2595	12.0665	5.17683	5.57486	6.20288	10.4977	8.23443	5.52258	4.44236	10.0182	9.60504	9.86393	13.2472	11.6869
sp|O43298|ZBT43_HUMAN	O43298	10.7018	11.146	12.1917	9.73793	8.70555						10.8286	12.214	10.1623	8.14526	10.1285						10.4275	10.2088	1.02142	0.815524	0.875626		sp|O43298|ZBT43_HUMAN	ZBTB43	Zinc finger and BTB domain-containing protein 43 OS=Homo sapiens OX=9606 GN=ZBTB43 PE=1 SV=1	1	0	9.83374	10.6249	11.8472	9.23057	8.42508	10.5667	12.214	9.92138	7.63809	9.69827	0	0	0	0	0	0	0
sp|O43299|AP5Z1_HUMAN	O43299	9.05005	11.1981	9.73007	11.1302	10.2625	6.03401	8.42839	11.105	10.4269	26.2744	8.07093	9.9471	8.88774	10.8188	15.067	7.98578	9.34126	9.05249	9.08959	9.29483	10.5712	9.5982	1.10137	0.463971	0.595326		sp|O43299|AP5Z1_HUMAN	AP5Z1	AP-5 complex subunit zeta-1 OS=Homo sapiens OX=9606 GN=AP5Z1 PE=1 SV=2	2	3	8.31599	10.6746	9.45513	10.5503	9.93183	7.87575	9.9471	8.67703	10.1452	14.4271	5.59933	7.63459	10.3706	9.49716	23.3422	7.95755	9.11011
sp|O43301|HS12A_HUMAN	O43301	7.87688	8.5552	7.8939	10.2375	11.1952	9.67906	15.0864	8.43326	7.61366	12.0143	14.5233	9.4916	12.6079	9.18911	12.3316	11.8133	15.8853	8.82269	9.16637	7.48803	9.6312	10.8389	1.1254	0.271395	0.40822		sp|O43301|HS12A_HUMAN	HSPA12A	Heat shock 70 kDa protein 12A OS=Homo sapiens OX=9606 GN=HSPA12A PE=1 SV=2	5	2	7.23797	8.15523	7.67085	9.70409	10.8345	14.1721	9.4916	12.309	8.61694	11.8078	8.9818	13.6655	7.87554	6.93479	10.6735	11.7715	15.4922
sp|O43306|ADCY6_HUMAN	O43306	12.9455	13.0904	12.6652	15.3161	11.3499	13.1939	9.6372	13.0694	12.1266	9.86647	7.04348	8.81224	6.28267	7.84144	9.02766	7.32922	8.40419	9.21572	11.7879	11.6779	12.2188	8.57803	1.42443	0.00026313	0.0033632	1	sp|O43306|ADCY6_HUMAN	ADCY6	Adenylate cyclase type 6 OS=Homo sapiens OX=9606 GN=ADCY6 PE=1 SV=2	1	1	11.8955	12.4784	12.3073	14.5181	10.9842	6.87315	8.81224	6.13372	7.35319	8.64423	12.2434	8.72955	12.2051	11.0453	8.76538	7.30331	8.19623
sp|O43310|CTIF_HUMAN	O43310	7.64852	9.29097	8.09815	8.2183	10.0207	5.55062	6.07204	8.27188	7.69989	10.2738	9.99791	8.75585	10.4165	15.3986	16.3303	21.2155	17.7992	11.7025	7.81691	8.36506	7.97847	12.0816	1.51427	0.00436498	0.022101	3	sp|O43310|CTIF_HUMAN	CTIF	CBP80/20-dependent translation initiation factor OS=Homo sapiens OX=9606 GN=CTIF PE=1 SV=1	1	1	7.02814	8.8566	7.86933	7.79011	9.69784	9.75613	8.75585	10.1695	14.4398	15.6367	5.15077	5.50016	7.72483	7.01333	9.12722	21.1405	17.3588
sp|O43312|MTSS1_HUMAN	O43312	9.66591	10.8142	9.62929	11.6018	9.63461	6.49538	7.88727	9.45586	9.30426	6.69218	9.49359	11.5168	8.92628	11.6537	11.1822	11.2766	8.91618	13.8238	14.5819	16.8294	8.97567	11.5806	1.29022	0.0110573	0.0415058	3	sp|O43312|MTSS1_HUMAN	MTSS1	Protein MTSS 1 OS=Homo sapiens OX=9606 GN=MTSS1 PE=1 SV=2	2	5	8.88189	10.3086	9.3572	10.9973	9.32421	9.26401	11.5168	8.71465	10.9281	10.7073	6.02747	7.14443	8.83051	8.47465	5.94534	11.2367	8.69555
sp|O43314|VIP2_HUMAN	O43314	10.6414	9.62805	10.6884	11.1479	9.09059	5.32645	6.47568	9.26862	9.15748	10.249	10.5499	11.903	10.8735	10.2729	9.23831	16.3612	16.1421	11.0883	10.0936	10.9599	8.95866	11.5426	1.28843	0.017099	0.0566121	3	sp|O43314|VIP2_HUMAN	PPIP5K2	Inositol hexakisphosphate and diphosphoinositol-pentakisphosphate kinase 2 OS=Homo sapiens OX=9606 GN=PPIP5K2 PE=1 SV=3	1	2	9.77823	9.17792	10.3864	10.5671	8.79772	10.2948	11.903	10.6157	9.63324	8.84593	4.94274	5.86579	8.65565	8.34096	9.10522	16.3034	15.7427
sp|O43318|M3K7_HUMAN	O43318	8.05923	9.31561	8.5538	10.858	9.7289	9.46486	11.5318	12.8976	12.9458	9.84631	11.9227	11.4591	9.13756	12.5183	12.471	7.07176	7.62017	10.8654	12.0571	12.0113	10.1986	10.5152	1.03104	0.71571	0.801498		sp|O43318|M3K7_HUMAN	MAP3K7	Mitogen-activated protein kinase kinase kinase 7 OS=Homo sapiens OX=9606 GN=MAP3K7 PE=1 SV=1	2	5	7.40553	8.88009	8.3121	10.2923	9.41546	11.6344	11.4591	8.92092	11.7388	11.9413	8.78303	10.4457	12.0446	11.7915	8.74747	7.04676	7.43161
sp|O43324|MCA3_HUMAN	O43324	8.06245	10.0368	8.73246	8.86476	10.5147	10.4444	11.5727	12.5789	13.0557	9.52024	11.3082	14.305	10.8816	10.2435	10.8513	6.13699	8.93836	9.40285	12.4275	12.2931	10.2213	10.4424	1.02163	0.805708	0.869382		sp|O43324|MCA3_HUMAN	EEF1E1	Eukaryotic translation elongation factor 1 epsilon-1 OS=Homo sapiens OX=9606 GN=EEF1E1 PE=1 SV=1	3	5	7.40849	9.56758	8.48571	8.40289	10.1759	11.0347	14.305	10.6236	9.60565	10.3904	9.69198	10.4828	11.747	11.8916	8.45779	6.11529	8.71718
sp|O43347|MSI1H_HUMAN	O43347	9.94999	11.1598	11.3924	11.1668	11.6461	15.7182	10.4686	11.4736	11.3882	9.49405	9.44921	13.0803	8.63419	9.46864	8.02362	9.47027	8.59566	9.2716	10.4542	9.90155	11.2878	9.55363	1.18152	0.0126081	0.0454819		sp|O43347|MSI1H_HUMAN	MSI1	RNA-binding protein Musashi homolog 1 OS=Homo sapiens OX=9606 GN=MSI1 PE=1 SV=1	11	11	9.14293	10.6381	11.0705	10.585	11.2709	9.2207	13.0803	8.42949	8.87907	7.68283	14.5859	9.48265	10.7148	10.3728	8.43452	9.43679	8.38296
sp|O43353|RIPK2_HUMAN	O43353						5.2876	12.7221	13.5307	14.2074	13.6937						3.00167	8.39017	14.0701	11.4705	10.2964	11.2108	8.40117	1.33443	0.406022	0.541814		sp|O43353|RIPK2_HUMAN	RIPK2	Receptor-interacting serine/threonine-protein kinase 2 OS=Homo sapiens OX=9606 GN=RIPK2 PE=1 SV=2	0	1	0	0	0	0	0	0	0	0	0	0	4.90669	11.5239	12.6359	12.9406	12.1655	2.99106	8.18256
sp|O43390|HNRPR_HUMAN	O43390	12.2639	11.9284	12.8778	10.5198	14.5601	17.7347	11.8937	10.0859	9.94268	11.4287	9.16903	7.94767	9.36872	7.812	7.74535	8.83453	9.49496	9.09898	9.16168	8.7464	12.1439	8.71469	1.3935	3.77055e-05	0.00111043	1	sp|O43390|HNRPR_HUMAN	HNRNPR	Heterogeneous nuclear ribonucleoprotein R OS=Homo sapiens OX=9606 GN=HNRNPR PE=1 SV=1	61	50	11.2692	11.3707	12.5139	9.97173	14.091	8.9473	7.94767	9.1466	7.32558	7.41638	16.4571	10.7735	9.4189	9.05615	10.1533	8.8033	9.26001
sp|O43395|PRPF3_HUMAN	O43395	11.3358	11.0285	11.5571	10.4514	10.8254	13.2151	9.37958	10.3647	9.77687	10.0806	10.267	10.0471	10.1127	9.34093	9.14722	11.1036	10.3272	11.205	9.9537	10.48	10.7546	10.1794	1.0565	0.153679	0.27216		sp|O43395|PRPF3_HUMAN	PRPF3	U4/U6 small nuclear ribonucleoprotein Prp3 OS=Homo sapiens OX=9606 GN=PRPF3 PE=1 SV=2	20	12	10.4163	10.5129	11.2305	9.90687	10.4766	10.0187	10.0471	9.87296	8.75931	8.75871	12.2631	8.49619	9.67924	8.90512	8.95562	11.0643	10.0717
sp|O43396|TXNL1_HUMAN	O43396	8.47421	9.55511	9.2378	9.95184	10.4363	8.95327	11.4978	12.1721	11.7225	11.875	10.5517	10.2486	10.1907	11.4171	13.9883	9.0567	10.4742	10.0277	10.2496	10.2209	10.3085	10.5779	1.02613	0.644485	0.748519		sp|O43396|TXNL1_HUMAN	TXNL1	Thioredoxin-like protein 1 OS=Homo sapiens OX=9606 GN=TXNL1 PE=1 SV=3	21	23	7.78685	9.10839	8.97677	9.43333	10.1001	10.2965	10.2486	9.94911	10.7062	13.3942	8.3083	10.4149	11.3671	10.6773	10.5498	9.02468	10.215
sp|O43399|TPD54_HUMAN	O43399	6.94639	7.58169	8.93203	8.40398	8.26273	7.78869	12.6232	10.0321	10.0089	10.9027	13.3282	11.2197	12.6678	12.2598	14.2638	13.478	10.5876	9.73349	10.1549	10.5842	9.00747	11.7333	1.30262	0.00171346	0.0117915	4	sp|O43399|TPD54_HUMAN	TPD52L2	Tumor protein D54 OS=Homo sapiens OX=9606 GN=TPD52L2 PE=1 SV=2	18	20	6.38296	7.22723	8.67964	7.96612	7.99653	13.0059	11.2197	12.3675	11.4964	13.658	7.22761	11.4343	9.36862	9.1165	9.68593	13.4303	10.3256
sp|O43402|EMC8_HUMAN	O43402	9.9839	10.1548	11.3666	10.5532	10.4397	8.64281	8.78303	9.10628	8.92042	9.81775	9.66378	10.3001	11.6189	8.94502	10.9993	13.9175	13.215	11.2085	10.2991	11.5427	9.74028	11.08	1.13754	0.0218132	0.066918		sp|O43402|EMC8_HUMAN	EMC8	ER membrane protein complex subunit 8 OS=Homo sapiens OX=9606 GN=EMC8 PE=1 SV=1	12	7	9.17409	9.68008	11.0454	10.0034	10.1034	9.43008	10.3001	11.3434	8.38805	10.5321	8.0202	7.95583	8.50405	8.12504	8.7221	13.8683	12.888
sp|O43414|ERI3_HUMAN	O43414	9.2892	8.94613	10.1937	9.93638	9.71668	10.0872	12.066	12.1562	11.2896	10.4568	11.3465	13.3623	11.2276	10.605	9.26132	6.38779	8.08299	10.9099	12.8102	12.0778	10.3631	10.3836	1.00198	0.970876	0.980937		sp|O43414|ERI3_HUMAN	ERI3	ERI1 exoribonuclease 3 OS=Homo sapiens OX=9606 GN=ERI3 PE=1 SV=2	12	11	8.53574	8.52788	9.90562	9.41868	9.40363	11.0721	13.3623	10.9614	9.94464	8.86796	9.36053	10.9296	11.3523	10.283	9.28985	6.36521	7.88298
sp|O43426|SYNJ1_HUMAN	O43426						10.9641	12.7443	11.7109	11.626	8.97828						9.31816	8.72094	12.0339	9.33114	10.6943	11.1301	9.95125	1.11847	0.211982	0.342285		sp|O43426|SYNJ1_HUMAN	SYNJ1	Synaptojanin-1 OS=Homo sapiens OX=9606 GN=SYNJ1 PE=1 SV=2	0	3	0	0	0	0	0	0	0	0	0	0	10.1743	11.544	10.9364	10.5894	7.97631	9.28522	8.50514
sp|O43427|FIBP_HUMAN	O43427	10.3097	10.3305	11.1186	9.60052	10.0893	13.6251	10.1366	13.2615	12.9264	9.47289	10.2703	11.1637	10.264	10.0602	10.83	3.91972	9.0043	11.3073	10.558	12.2233	10.991	9.59352	1.14567	0.236946	0.372309		sp|O43427|FIBP_HUMAN	FIBP	Acidic fibroblast growth factor intracellular-binding protein OS=Homo sapiens OX=9606 GN=FIBP PE=1 SV=3	4	2	9.47345	9.84755	10.8044	9.10032	9.76421	10.0219	11.1637	10.0207	9.43381	10.37	12.6436	9.18194	12.3845	11.7738	8.41572	3.90586	8.78149
sp|O43432|IF4G3_HUMAN	O43432	8.74108	8.85573	9.64228	8.71795	8.37713	8.37097	10.0889	12.8392	12.4355	10.4203	12.2683	13.5538	11.9616	10.7903	10.9278	8.14093	10.089	11.5468	10.7261	11.4492	9.73684	11.0571	1.13559	0.0682041	0.151931		sp|O43432|IF4G3_HUMAN	EIF4G3	Eukaryotic translation initiation factor 4 gamma 3 OS=Homo sapiens OX=9606 GN=EIF4G3 PE=1 SV=2	23	17	8.03208	8.44171	9.36982	8.26373	8.10724	11.9716	13.5538	11.678	10.1184	10.4637	7.76794	9.13874	11.9901	11.3267	9.25743	8.11215	9.83934
sp|O43447|PPIH_HUMAN	O43447	11.8919	11.2218	10.7082	11.1212	10.2956	13.0445	12.6985	11.4327	11.3798	11.1521	9.76164	9.52125	9.13608	10.6119	9.97035	5.90851	8.54246	9.94757	10.9765	11.4377	11.4674	9.44727	1.21383	0.0062399	0.0284499	2	sp|O43447|PPIH_HUMAN	PPIH	Peptidyl-prolyl cis-trans isomerase H OS=Homo sapiens OX=9606 GN=PPIH PE=1 SV=1	8	6	10.9273	10.6972	10.4056	10.5418	9.96386	9.52557	9.52125	8.91948	9.95118	9.54688	12.1048	11.5025	10.6766	10.3651	9.90757	5.88762	8.33108
sp|O43448|KCAB3_HUMAN	O43448	8.00637	9.78127	8.7295	8.99778	8.78499	12.1828	13.6505	15.1976	15.7786	9.33801	12.1899	13.4551	12.067	11.518	10.3114	7.61262	7.17774	7.52846	9.08663	9.18572	10.7243	9.78796	1.09566	0.404484	0.540723		sp|O43448|KCAB3_HUMAN	KCNAB3	Voltage-gated potassium channel subunit beta-3 OS=Homo sapiens OX=9606 GN=KCNAB3 PE=2 SV=2	3	2	7.35696	9.32398	8.48284	8.52898	8.50196	11.8951	13.4551	11.7809	10.8008	9.87342	11.3052	12.3649	14.1925	14.3717	8.2959	7.58571	7.00013
sp|O43462|MBTP2_HUMAN	O43462	10.3149	12.9317	11.5846	12.6468	10.8333						8.4412	11.2563	9.0105	7.65745	9.39323						11.6185	9.0759	1.28015	0.0126648	0.0456041		sp|O43462|MBTP2_HUMAN	MBTPS2	Membrane-bound transcription factor site-2 protease OS=Homo sapiens OX=9606 GN=MBTPS2 PE=1 SV=1	1	0	9.47824	12.3271	11.2573	11.9879	10.4843	8.23707	11.2563	8.79688	7.18065	8.99427	0	0	0	0	0	0	0
sp|O43464|HTRA2_HUMAN	O43464	13.399	13.5513	13.3592	12.5759	11.9135	11.121	8.70878	9.98404	11.3428	10.4844	6.90024	7.35038	7.2146	8.67502	9.47823	10.3645	10.3045	11.0546	11.5435	11.0098	11.5374	9.23553	1.24924	0.00944398	0.0372711	1	sp|O43464|HTRA2_HUMAN	HTRA2	Serine protease HTRA2, mitochondrial OS=Homo sapiens OX=9606 GN=HTRA2 PE=1 SV=2	8	6	12.3122	12.9178	12.9817	11.9207	11.5297	6.73337	7.35038	7.04355	8.13486	9.07566	10.3199	7.88857	9.32376	10.3314	9.31439	10.3279	10.0495
sp|O43488|ARK72_HUMAN	O43488	8.95924	9.01322	9.2679	9.28235	10.1336	8.37594	9.48652	10.4992	10.4601	10.5194	11.767	12.766	11.0052	10.5315	11.1697	8.72252	10.5869	14.2027	11.2042	11.7688	9.57278	11.2895	1.17933	0.00276381	0.0162307		sp|O43488|ARK72_HUMAN	AKR7A2	Aflatoxin B1 aldehyde reductase member 2 OS=Homo sapiens OX=9606 GN=AKR7A2 PE=1 SV=3	23	28	8.23254	8.59184	9.00602	8.79873	9.80716	11.4824	12.766	10.7443	9.87577	10.6953	7.77256	8.59306	9.80484	9.52747	9.34545	8.69168	10.3249
sp|O43490|PROM1_HUMAN	O43490	9.50694	8.6512	9.05316	8.36381	8.27412						13.7435	13.0599	13.5126	9.21183	10.4259						8.75807	11.8426	1.35219	0.00723183	0.0312134		sp|O43490|PROM1_HUMAN	PROM1	Prominin-1 OS=Homo sapiens OX=9606 GN=PROM1 PE=1 SV=1	1	0	8.73582	8.24674	8.79735	7.92804	8.00755	13.4111	13.0599	13.1922	8.63825	9.98305	0	0	0	0	0	0	0
sp|O43491|E41L2_HUMAN	O43491	11.3599	9.15156	11.2652	9.29327	13.4099	12.5187	14.4265	9.04947	8.15763	12.4886	13.1218	8.6652	9.49545	8.3164	9.98959	12.4806	14.9766	7.03801	7.99212	7.03654	10.9286	9.59819	1.13861	0.227476	0.360936		sp|O43491|E41L2_HUMAN	EPB41L2	Band 4.1-like protein 2 OS=Homo sapiens OX=9606 GN=EPB41L2 PE=1 SV=1	45	33	10.4385	8.72371	10.9469	8.80908	12.9779	12.8045	8.6652	9.27033	7.79857	9.5653	11.6169	13.0678	8.45099	7.43026	11.0949	12.4365	14.606
sp|O43493|TGON2_HUMAN	O43493	10.2156	13.6392	11.1794	13.8298	10.0165						6.49383	8.27935	8.6909	10.3429	11.6395						11.6627	8.91308	1.3085	0.0577754	0.133958		sp|O43493|TGON2_HUMAN	TGOLN2	Trans-Golgi network integral membrane protein 2 OS=Homo sapiens OX=9606 GN=TGOLN2 PE=1 SV=4	1	0	9.38702	13.0015	10.8635	13.1092	9.69379	6.33679	8.27935	8.48485	9.69893	11.1451	0	0	0	0	0	0	0
sp|O43504|LTOR5_HUMAN	O43504	12.6917	9.77713	9.48186	9.55468	8.62134	12.5028	8.5887	10.2903	10.7526	11.3326	10.3493	9.10119	11.1105	11.1936	12.3854	13.0441	10.4669	10.4447	9.4006	9.07276	10.2698	10.5844	1.03063	0.613118	0.72347		sp|O43504|LTOR5_HUMAN	LAMTOR5	Ragulator complex protein LAMTOR5 OS=Homo sapiens OX=9606 GN=LAMTOR5 PE=1 SV=1	12	12	11.6623	9.32003	9.21394	9.05687	8.34358	10.099	9.10119	10.8471	10.4966	11.8594	11.6021	7.7798	9.60978	9.79383	10.0679	12.998	10.2079
sp|O43505|B4GA1_HUMAN	O43505	11.0554	11.2547	10.5846	11.2163	9.94092	11.865	10.8362	12.127	12.4269	11.1565	11.9975	8.48391	10.7593	9.9533	8.92473	9.71724	8.56583	8.71752	10.2661	10.6492	11.2245	9.7442	1.15191	0.00347137	0.018884		sp|O43505|B4GA1_HUMAN	B4GAT1	Beta-1,4-glucuronyltransferase 1 OS=Homo sapiens OX=9606 GN=B4GAT1 PE=1 SV=1	11	3	10.1587	10.7285	10.2855	10.6319	9.62065	11.7074	8.48391	10.5042	9.33355	8.54567	11.0103	9.81566	11.325	11.3189	9.91148	9.68288	8.35387
sp|O43516|WIPF1_HUMAN	O43516						9.13614	7.63056	7.49297	6.58841	8.26065						13.829	17.015	13.081	10.6122	11.3792	7.77595	13.0028	1.67218	0.000824981	0.00707326		sp|O43516|WIPF1_HUMAN	WIPF1	WAS/WASL-interacting protein family member 1 OS=Homo sapiens OX=9606 GN=WIPF1 PE=1 SV=3	0	1	0	0	0	0	0	0	0	0	0	0	8.47799	6.9119	6.99743	6.00096	7.33877	13.7801	16.594
sp|O43524|FOXO3_HUMAN	O43524	7.97209	10.3118	8.97331	9.26842	7.84697	15.1438	10.0092	10.7971	11.5008	9.32564	13.4513	12.7386	11.7852	10.6348	10.8637	12.1759	10.3746	11.7553	7.84632	7.03134	9.94011	10.6693	1.07336	0.437876	0.570116		sp|O43524|FOXO3_HUMAN	FOXO3	Forkhead box protein O3 OS=Homo sapiens OX=9606 GN=FOXO3 PE=1 SV=1	2	2	7.32546	9.82971	8.71976	8.78552	7.59416	13.126	12.7386	11.5058	9.97266	10.4023	14.0529	9.06647	10.083	10.4753	8.28491	12.1329	10.1179
sp|O43556|SGCE_HUMAN	O43556	8.53055	9.2322	8.31932	9.11543	8.81145	8.35709	14.0535	11.9958	11.7664	13.6852	14.8252	11.4016	14.157	9.35131	10.0778	8.6412	10.8368	7.34785	10.1149	9.77929	10.1788	10.4378	1.02544	0.792433	0.859449		sp|O43556|SGCE_HUMAN	SGCE	Epsilon-sarcoglycan OS=Homo sapiens OX=9606 GN=SGCE PE=1 SV=6	4	7	7.83862	8.80058	8.08425	8.6405	8.52757	14.4667	11.4016	13.8214	8.76904	9.64974	7.75506	12.7299	11.2025	10.7173	12.1579	8.61065	10.5686
sp|O43567|RNF13_HUMAN	O43567	10.9455	10.5813	11.1508	9.81814	6.34991	12.2147	9.40374	11.8271	13.3128	7.9909	9.9538	14.7409	11.3785	10.8046	8.22275	9.63608	8.79457	11.1387	10.0413	11.6439	10.1527	10.5052	1.03473	0.70099	0.790485		sp|O43567|RNF13_HUMAN	RNF13	E3 ubiquitin-protein ligase RNF13 OS=Homo sapiens OX=9606 GN=RNF13 PE=1 SV=1	26	21	10.0577	10.0866	10.8357	9.3066	6.14533	9.71309	14.7409	11.1087	10.1318	7.87351	11.3348	8.51808	11.0449	12.1258	7.09912	9.60201	8.57695
sp|O43572|AKA10_HUMAN	O43572	10.6998	9.39731	9.41859	8.99797	8.82253	7.29325	7.12884	9.79396	9.91931	9.70644	12.8951	10.3138	12.1197	10.6716	10.7084	14.8139	6.66771	17.7763	12.1739	10.0238	9.05012	11.4716	1.26756	0.0188539	0.060346	3	sp|O43572|AKA10_HUMAN	AKAP10	A-kinase anchor protein 10, mitochondrial OS=Homo sapiens OX=9606 GN=AKAP10 PE=1 SV=2	5	1	9.83196	8.95797	9.15245	8.52916	8.53829	12.5833	10.3138	11.8324	10.0071	10.2536	6.76786	6.45743	9.14625	9.03486	8.62321	14.7615	6.50272
sp|O43581|SYT7_HUMAN	O43581	10.3222	10.3302	14.2541	12.7418	19.3479						7.33227	7.66992	7.39478	5.96094	8.75165						13.0238	7.36668	1.76793	0.00267897	0.0160172		sp|O43581|SYT7_HUMAN	SYT7	Synaptotagmin-7 OS=Homo sapiens OX=9606 GN=SYT7 PE=1 SV=3	3	0	9.48492	9.84723	13.8513	12.0779	18.7246	7.15495	7.66992	7.21946	5.58978	8.37994	0	0	0	0	0	0	0
sp|O43583|DENR_HUMAN	O43583	8.16922	8.97774	9.62185	8.90355	10.9606	8.9974	11.8214	10.6257	9.13123	11.0123	14.369	11.1243	13.0252	11.1057	7.5839	11.5498	10.7322	9.04022	12.6877	10.367	9.75788	10.9961	1.1269	0.101286	0.202068		sp|O43583|DENR_HUMAN	DENR	Density-regulated protein OS=Homo sapiens OX=9606 GN=DENR PE=1 SV=2	11	7	7.5066	8.55802	9.34997	8.43966	10.6075	14.0215	11.1243	12.7164	10.4142	7.26179	8.34925	10.708	9.92299	8.31705	9.78333	11.509	10.4666
sp|O43592|XPOT_HUMAN	O43592	8.45987	8.76978	8.80549	9.53357	10.062	9.82432	13.5277	10.3792	10.8652	12.9411	13.6964	10.8716	12.3322	11.2097	10.1793	9.27767	12.7865	8.4332	9.5598	8.77194	10.197	10.5803	1.03758	0.616622	0.726079		sp|O43592|XPOT_HUMAN	XPOT	Exportin-T OS=Homo sapiens OX=9606 GN=XPOT PE=1 SV=2	21	13	7.77368	8.35978	8.55668	9.03686	9.73782	13.3652	10.8716	12.0398	10.5117	9.74692	9.1166	12.2536	9.69274	9.89643	11.4969	9.24487	12.4701
sp|O43598|DNPH1_HUMAN	O43598	10.6212	9.82567	9.95857	10.8004	11.0653	7.15095	8.12527	9.23092	8.3769	7.91055	8.41922	10.8688	9.1805	12.1119	11.3264	13.6999	13.2638	12.9003	12.2821	12.2364	9.21483	11.5041	1.24843	0.00470076	0.0233961	3	sp|O43598|DNPH1_HUMAN	DNPH1	2'-deoxynucleoside 5'-phosphate N-hydrolase 1 OS=Homo sapiens OX=9606 GN=DNPH1 PE=1 SV=1	8	9	9.75972	9.3663	9.67718	10.2377	10.7088	8.21562	10.8688	8.96285	11.3577	10.8453	6.63581	7.36002	8.62044	7.62998	7.02774	13.6515	12.9356
sp|O43615|TIM44_HUMAN	O43615	11.4119	11.5977	11.9307	10.944	10.5223	11.328	8.44451	9.28507	9.10793	10.3598	9.22078	9.40083	9.93476	9.39153	9.81988	11.1951	10.8637	11.4653	11.8106	11.86	10.4303	10.4488	1.00178	0.972626	0.981922		sp|O43615|TIM44_HUMAN	TIMM44	Mitochondrial import inner membrane translocase subunit TIM44 OS=Homo sapiens OX=9606 GN=TIMM44 PE=1 SV=2	14	12	10.4863	11.0555	11.5936	10.3738	10.1833	8.99779	9.40083	9.69922	8.80676	9.4028	10.512	7.64919	8.67101	8.29583	9.20369	11.1555	10.5949
sp|O43617|TPPC3_HUMAN	O43617	7.39301	8.42765	8.91641	8.02328	7.46922	9.24229	11.0084	11.0416	11.8084	9.84392	12.6659	15.4884	13.4458	10.9906	10.8544	7.94583	9.63129	12.147	11.2776	12.1218	9.20077	11.4867	1.24845	0.0110258	0.041451	4	sp|O43617|TPPC3_HUMAN	TRAPPC3	Trafficking protein particle complex subunit 3 OS=Homo sapiens OX=9606 GN=TRAPPC3 PE=1 SV=1	3	5	6.79335	8.03364	8.66446	7.60526	7.22858	12.3596	15.4884	13.127	10.3063	10.3934	8.5765	9.9716	10.3114	10.7555	8.74535	7.91774	9.39297
sp|O43633|CHM2A_HUMAN	O43633	7.99886	9.8153	9.87726	9.82297	8.12445	8.98745	11.1231	11.8758	12.2653	9.88276	11.8825	14.7529	11.8861	10.7422	8.87276	11.4003	9.51915	10.6252	10.1463	10.1874	9.88482	10.8998	1.10268	0.143425	0.258225		sp|O43633|CHM2A_HUMAN	CHMP2A	Charged multivesicular body protein 2a OS=Homo sapiens OX=9606 GN=CHMP2A PE=1 SV=1	10	13	7.35006	9.35642	9.59816	9.31118	7.8627	11.5951	14.7529	11.6043	10.0733	8.49591	8.34001	10.0755	11.0904	11.1717	8.77985	11.36	9.2836
sp|O43639|NCK2_HUMAN	O43639	9.04476	9.75413	9.40798	9.9904	8.10385	7.74489	10.1461	11.8429	10.9629	9.46717	11.336	12.1634	11.416	12.0157	10.7547	9.03819	10.8809	12.5448	11.5782	11.6436	9.57695	11.2962	1.17952	0.00366932	0.0196515		sp|O43639|NCK2_HUMAN	NCK2	Cytoplasmic protein NCK2 OS=Homo sapiens OX=9606 GN=NCK2 PE=1 SV=2	3	2	8.31113	9.29811	9.14214	9.46989	7.84277	11.0619	12.1634	11.1453	11.2675	10.2979	7.18697	9.19051	11.0597	9.98536	8.41064	9.00624	10.6117
sp|O43657|TSN6_HUMAN	O43657	12.1192	11.0086	10.9087	11.8574	6.63291	10.783	8.13816	12.2928	15.8539	10.0446	9.20622	13.8818	11.4472	11.9056	5.12265	11.7707	7.56846	13.3239	7.84462	8.4323	10.6996	9.65036	1.10872	0.417712	0.552086		sp|O43657|TSN6_HUMAN	TSPAN6	Tetraspanin-6 OS=Homo sapiens OX=9606 GN=TSPAN6 PE=1 SV=1	13	10	11.1362	10.4939	10.6005	11.2396	6.41922	8.98359	13.8818	11.1758	11.1643	4.90508	10.0062	7.37169	11.4798	14.4403	8.92361	11.7291	7.38118
sp|O43660|PLRG1_HUMAN	O43660	11.055	12.8248	11.8627	11.6151	12.0903	22.7103	10.6747	7.97643	8.59615	9.98981	8.96589	8.75796	8.68731	8.89831	9.44685	10.1085	8.25081	8.87744	9.91035	9.17177	11.4644	9.09179	1.26096	0.0215855	0.0664337	1	sp|O43660|PLRG1_HUMAN	PLRG1	Pleiotropic regulator 1 OS=Homo sapiens OX=9606 GN=PLRG1 PE=1 SV=1	10	8	10.1583	12.2252	11.5275	11.0099	11.7008	8.74907	8.75796	8.48135	8.34425	9.04561	21.0743	9.66933	7.44892	7.82968	8.87496	10.0728	8.04665
sp|O43670|ZN207_HUMAN	O43670	9.4216	10.8062	11.6216	11.6324	11.7678	10.3059	9.96396	10.0517	9.23248	11.9031	9.97448	8.59749	9.78698	9.7752	10.7372	7.81062	11.134	13.7306	13.1742	8.67788	10.6271	10.1861	1.04329	0.525624	0.649873		sp|O43670|ZN207_HUMAN	ZNF207	BUB3-interacting and GLEBS motif-containing protein ZNF207 OS=Homo sapiens OX=9606 GN=ZNF207 PE=1 SV=1	7	8	8.6574	10.301	11.2932	11.0263	11.3887	9.73327	8.59749	9.55495	9.16654	10.2812	9.56344	9.02554	9.38693	8.40927	10.5747	7.78301	10.8585
sp|O43674|NDUB5_HUMAN	O43674	11.584	12.5619	12.5035	13.3116	11.0531	12.7292	9.72911	11.0917	10.8892	9.45198	7.90391	8.42008	7.58233	9.34318	10.0456	7.1961	8.54256	12.3309	11.7874	12.3333	11.4237	9.37046	1.21911	0.0152604	0.0523536	1	sp|O43674|NDUB5_HUMAN	NDUFB5	NADH dehydrogenase [ubiquinone] 1 beta subcomplex subunit 5, mitochondrial OS=Homo sapiens OX=9606 GN=NDUFB5 PE=1 SV=1	11	11	10.6444	11.9746	12.1502	12.618	10.697	7.71277	8.42008	7.40257	8.76142	9.61896	11.8122	8.8128	10.3582	9.91829	8.39715	7.17066	8.33118
sp|O43676|NDUB3_HUMAN	O43676	12.9011	11.9255	11.4914	12.4445	10.5749	13.256	10.044	9.79274	9.67363	10.5604	8.18495	9.87208	8.96438	9.04632	8.86283	5.11059	7.60912	15.3759	11.7391	12.9646	11.1975	9.38215	1.19349	0.105649	0.207177		sp|O43676|NDUB3_HUMAN	NDUFB3	NADH dehydrogenase [ubiquinone] 1 beta subcomplex subunit 3 OS=Homo sapiens OX=9606 GN=NDUFB3 PE=1 SV=3	8	5	11.8547	11.368	11.1667	11.7961	10.2342	7.98701	9.87208	8.75185	8.48304	8.4864	12.3011	9.09803	9.14511	8.81109	9.38184	5.09252	7.42083
sp|O43678|NDUA2_HUMAN	O43678	13.9348	11.4175	12.357	13.4011	11.5257	12.5882	8.98656	8.71472	9.47388	8.93951	7.13362	9.41408	8.07234	8.60985	8.47675	7.82169	8.98364	17.0843	10.5905	12.5302	10.975	9.54891	1.14935	0.183118	0.309883		sp|O43678|NDUA2_HUMAN	NDUFA2	NADH dehydrogenase [ubiquinone] 1 alpha subcomplex subunit 2 OS=Homo sapiens OX=9606 GN=NDUFA2 PE=1 SV=3	6	6	12.8045	10.8837	12.0078	12.7029	11.1544	6.96111	9.41408	7.88096	8.07375	8.11672	11.6814	8.14019	8.13838	8.62915	7.94187	7.79404	8.76134
sp|O43681|ASNA_HUMAN	O43681	10.5415	10.177	10.0449	10.699	10.038	11.1251	11.808	11.9484	12.3192	11.2556	10.2295	10.9337	9.7883	10.8545	10.8031	8.48688	8.89162	9.7002	10.7851	10.0543	10.9678	10.0188	1.09472	0.0230206	0.0694179		sp|O43681|ASNA_HUMAN	ASNA1	ATPase ASNA1 OS=Homo sapiens OX=9606 GN=ASNA1 PE=1 SV=2	23	28	9.68648	9.70123	9.76102	10.1416	9.71457	9.98212	10.9337	9.55624	10.1786	10.3443	10.3237	10.6959	11.1582	11.2208	9.99945	8.45687	8.6716
sp|O43684|BUB3_HUMAN	O43684	10.9796	11.2705	11.3896	10.663	9.80185	12.1786	12.6269	11.8307	12.0008	11.6286	10.149	10.4766	10.4955	9.62241	9.24883	8.93775	9.4227	9.85005	9.1472	8.80238	11.41	9.59787	1.18881	2.28226e-05	0.000837622		sp|O43684|BUB3_HUMAN	BUB3	Mitotic checkpoint protein BUB3 OS=Homo sapiens OX=9606 GN=BUB3 PE=1 SV=1	10	10	10.089	10.7436	11.0678	10.1074	9.48606	9.90359	10.4766	10.2467	9.02326	8.856	11.3013	11.4377	11.0483	10.9308	10.3309	8.90615	9.18954
sp|O43707|ACTN4_HUMAN	O43707	10.3536	9.94689	9.33102	9.15749	9.71144	10.6847	11.1494	9.99394	10.5244	10.7749	11.1331	10.1937	10.301	12.5449	11.4669	11.6315	8.72022	10.0548	11.6031	10.8848	10.1441	10.8036	1.06501	0.115292	0.220615		sp|O43707|ACTN4_HUMAN	ACTN4	Alpha-actinin-4 OS=Homo sapiens OX=9606 GN=ACTN4 PE=1 SV=2	188	192	9.51379	9.48186	9.06736	8.68037	9.39856	10.8639	10.1937	10.0568	11.7638	10.9799	9.915	10.0993	9.333	9.58599	9.57245	11.5904	8.50444
sp|O43708|MAAI_HUMAN	O43708	11.5523	11.6075	12.2806	12.4294	10.6121	9.80564	9.95647	15.2307	15.6106	10.9167	7.07474	10.3296	8.23801	11.0316	9.10029	7.33114	5.76095	12.6619	9.68707	9.51626	11.8596	8.85958	1.33862	0.00427635	0.0218266	2	sp|O43708|MAAI_HUMAN	GSTZ1	Maleylacetoacetate isomerase OS=Homo sapiens OX=9606 GN=GSTZ1 PE=1 SV=3	6	7	10.6153	11.0648	11.9336	11.7818	10.2702	6.90365	10.3296	8.0427	10.3447	8.71377	9.09926	9.01875	14.2234	14.2187	9.69842	7.30522	5.6184
sp|O43716|GATC_HUMAN	O43716	11.3144	11.8362	13.0523	10.4164	13.1149	9.69202	8.39387	9.54061	8.93544	7.83395	8.32885	9.58704	7.70657	8.04016	10.7497	12.7376	11.5646	11.8665	12.1838	12.6481	10.2638	10.3661	1.00997	0.90585	0.937405		sp|O43716|GATC_HUMAN	GATC	Glutamyl-tRNA(Gln) amidotransferase subunit C, mitochondrial OS=Homo sapiens OX=9606 GN=GATC PE=1 SV=1	2	4	10.3967	11.2828	12.6835	9.87371	12.6924	8.12743	9.58704	7.52386	7.53953	10.2931	8.99383	7.60332	8.90965	8.13872	6.95969	12.6926	11.2784
sp|O43719|HTSF1_HUMAN	O43719	10.2115	10.5345	11.8978	9.78498	11.3655	12.8086	9.34726	8.32678	8.29501	8.43472	11.2465	10.3352	10.6502	8.89102	9.07947	14.8689	11.9022	10.8246	10.7195	9.93203	9.9928	10.738	1.07457	0.298155	0.435717		sp|O43719|HTSF1_HUMAN	HTATSF1	HIV Tat-specific factor 1 OS=Homo sapiens OX=9606 GN=HTATSF1 PE=1 SV=1	16	11	9.38327	10.042	11.5616	9.27517	10.9993	10.9745	10.3352	10.3977	8.33741	8.69384	11.8859	8.46692	7.7761	7.55539	7.49341	14.8163	11.6077
sp|O43731|ERD23_HUMAN	O43731	8.04258	10.2579	8.32579	11.5042	10.2084	5.1919	20.4081	6.78053	7.20896	17.7265	13.5858	7.86933	13.3079	11.7811	9.17985	19.2172	8.63669	9.66147	6.96275	4.51835	9.70416	9.74989	1.00471	0.980236	0.986592		sp|O43731|ERD23_HUMAN	KDELR3	ER lumen protein-retaining receptor 3 OS=Homo sapiens OX=9606 GN=KDELR3 PE=2 SV=1	4	2	7.39023	9.77831	8.09053	10.9048	9.87951	13.2573	7.86933	12.9924	11.0475	8.78995	4.81789	18.486	6.33211	6.56618	15.7482	19.1493	8.42298
sp|O43734|CIKS_HUMAN	O43734	8.84226	10.5521	8.91855	8.38202	10.4936	5.14013	5.4404	6.67828	6.4829	6.71566	11.7975	8.2407	11.3059	14.0138	11.6099	20.2164	17.0435	12.2642	12.8742	11.5554	7.54153	12.7375	1.68898	0.0001845	0.00279507	3	sp|O43734|CIKS_HUMAN	TRAF3IP2	Adapter protein CIKS OS=Homo sapiens OX=9606 GN=TRAF3IP2 PE=1 SV=3	1	2	8.12505	10.0588	8.66654	7.9453	10.1555	11.5122	8.2407	11.0379	13.1412	11.1168	4.76985	4.92801	6.23662	5.90486	5.9662	20.1449	16.6218
sp|O43739|CYH3_HUMAN	O43739	8.86145	9.09342	11.4379	9.54636	10.1511	7.84456	10.3944	10.2608	9.36989	10.3754	10.7716	9.69892	11.0979	10.6806	12.6794	12.5241	12.2001	11.9278	9.8749	10.8907	9.68549	11.1897	1.15531	0.00472097	0.0234507		sp|O43739|CYH3_HUMAN	CYTH3	Cytohesin-3 OS=Homo sapiens OX=9606 GN=CYTH3 PE=1 SV=2	5	4	8.14268	8.66829	11.1147	9.04898	9.82403	10.5111	9.69892	10.8348	10.0156	12.1409	7.27946	9.41543	9.58222	8.53443	9.21748	12.4798	11.8982
sp|O43741|AAKB2_HUMAN	O43741	8.70015	10.9099	8.78112	10.3124	11.1601	10.7076	10.602	12.4883	12.0981	10.9155	10.968	10.2147	9.58996	10.8759	12.5513	9.90527	10.921	8.45701	11.0795	9.0381	10.603	10.2998	1.02944	0.581694	0.697648		sp|O43741|AAKB2_HUMAN	PRKAB2	5'-AMP-activated protein kinase subunit beta-2 OS=Homo sapiens OX=9606 GN=PRKAB2 PE=1 SV=1	3	2	7.99447	10.3998	8.533	9.77511	10.8006	10.7028	10.2147	9.3626	10.1987	12.0182	9.93626	9.60347	11.6624	11.0194	9.69733	9.87025	10.6508
sp|O43747|AP1G1_HUMAN	O43747	9.01791	10.0249	9.45411	9.03003	9.11103	10.841	11.5579	12.3836	12.9635	9.49352	10.2418	13.376	11.6239	11.5359	10.5034	6.61098	8.13688	11.1866	11.8628	11.2829	10.2991	10.4507	1.01472	0.847507	0.900565		sp|O43747|AP1G1_HUMAN	AP1G1	AP-1 complex subunit gamma-1 OS=Homo sapiens OX=9606 GN=AP1G1 PE=1 SV=5	32	48	8.28645	9.5562	9.18697	8.55955	8.8175	9.99409	13.376	11.3483	10.8176	10.0573	10.06	10.4694	11.5646	11.8076	8.43405	6.58761	7.93553
sp|O43752|STX6_HUMAN	O43752	12.2056	11.9007	11.2749	11.8647	11.2801	6.55725	5.86366	10.8018	11.8242	9.05846	8.57986	8.21841	9.00549	10.6587	9.33951	11.4537	9.98481	13.2673	12.3598	14.297	9.97476	10.5418	1.05684	0.60299	0.715627		sp|O43752|STX6_HUMAN	STX6	Syntaxin-6 OS=Homo sapiens OX=9606 GN=STX6 PE=1 SV=1	10	7	11.2156	11.3443	10.9563	11.2465	10.9167	8.37237	8.21841	8.79198	9.99502	8.94283	6.08488	5.31141	10.0874	10.7699	8.04754	11.4132	9.73774
sp|O43759|SNG1_HUMAN	O43759	10.5871	10.9722	10.3181	12.1515	10.4801	10.5395	10.7401	10.8703	12.0966	8.98994	8.87422	9.7972	9.42866	9.39594	12.1692	6.77056	10.0171	10.4503	12.8679	12.7865	10.7403	10.0894	1.06452	0.365489	0.505832		sp|O43759|SNG1_HUMAN	SYNGR1	Synaptogyrin-1 OS=Homo sapiens OX=9606 GN=SYNGR1 PE=1 SV=2	3	3	9.72837	10.4592	10.0265	11.5184	10.1425	8.65961	9.7972	9.20512	8.81089	11.6523	9.78027	9.72858	10.1514	11.018	7.98667	6.74662	9.76923
sp|O43760|SNG2_HUMAN	O43760	9.79433	12.3957	12.0252	8.87151	7.22678	12.6201	9.00414	11.4141	12.5536	6.78977	9.00918	14.6738	11.7778	10.619	7.49191	7.38785	7.49944	10.6319	14.1568	13.9366	10.0343	10.3711	1.03357	0.770955	0.844951		sp|O43760|SNG2_HUMAN	SYNGR2	Synaptogyrin-2 OS=Homo sapiens OX=9606 GN=SYNGR2 PE=1 SV=1	4	4	8.9999	11.8162	11.6854	8.40929	6.99395	8.79131	14.6738	11.4986	9.95781	7.17371	11.711	8.15611	10.6592	11.4343	6.03204	7.36173	7.31387
sp|O43761|SNG3_HUMAN	O43761						7.51325	6.7432	8.84595	9.74522	7.09403						14.2462	11.8233	14.1822	11.5557	13.3324	7.91087	12.9771	1.64041	0.000309661	0.00369698		sp|O43761|SNG3_HUMAN	SYNGR3	Synaptogyrin-3 OS=Homo sapiens OX=9606 GN=SYNGR3 PE=1 SV=2	0	1	0	0	0	0	0	0	0	0	0	0	6.97201	6.10811	8.26093	8.87629	6.30234	14.1958	11.5307
sp|O43765|SGTA_HUMAN	O43765	10.3891	9.38209	10.5699	10.1218	8.62639	10.861	10.3203	12.6627	13.1485	9.43031	11.1335	12.6915	11.7074	11.2344	8.12046	6.1721	8.14253	11.4373	11.6879	12.4126	10.4701	10.2326	1.02322	0.799118	0.86448		sp|O43765|SGTA_HUMAN	SGTA	Small glutamine-rich tetratricopeptide repeat-containing protein alpha OS=Homo sapiens OX=9606 GN=SGTA PE=1 SV=1	12	8	9.54647	8.94346	10.2712	9.59444	8.34847	10.8643	12.6915	11.4298	10.5349	7.77556	10.0786	9.34827	11.8253	11.9761	8.3779	6.15028	7.94104
sp|O43768|ENSA_HUMAN	O43768						6.14337	5.86226	10.0192	8.30751	16.1644						14.743	13.351	13.4686	7.70156	9.81027	8.65102	11.4904	1.32822	0.23785	0.373113		sp|O43768|ENSA_HUMAN	ENSA	Alpha-endosulfine OS=Homo sapiens OX=9606 GN=ENSA PE=1 SV=1	0	7	0	0	0	0	0	0	0	0	0	0	5.70082	5.31014	9.35658	7.56678	14.3605	14.6909	13.0206
sp|O43772|MCAT_HUMAN	O43772	11.3662	12.4838	11.1476	13.6506	13.2717	9.80602	7.87453	9.17403	9.26809	12.8996	6.93926	6.60013	7.31782	10.3686	11.2797	10.1502	12.9398	11.5863	10.531	11.6005	10.9271	9.68847	1.12785	0.22785	0.361164		sp|O43772|MCAT_HUMAN	SLC25A20	Mitochondrial carnitine/acylcarnitine carrier protein OS=Homo sapiens OX=9606 GN=SLC25A20 PE=1 SV=1	5	5	10.4443	11.9002	10.8326	12.9394	12.8441	6.77145	6.60013	7.14433	9.72299	10.8006	9.09962	7.13289	8.56732	8.44171	11.46	10.1143	12.6196
sp|O43776|SYNC_HUMAN	O43776	10.5533	9.1991	8.73761	10.1405	10.0754	9.2935	10.7036	10.4921	10.7386	10.8141	10.3244	10.1642	10.583	12.7912	11.6072	9.98576	11.0048	11.9271	10.3069	10.6879	10.0493	10.9061	1.08526	0.030479	0.0844111		sp|O43776|SYNC_HUMAN	NARS1	Asparagine--tRNA ligase, cytoplasmic OS=Homo sapiens OX=9606 GN=NARS1 PE=1 SV=1	44	46	9.69732	8.76903	8.49072	9.61218	9.75081	10.0747	10.1642	10.3321	11.9947	11.1142	8.62402	9.69548	9.79817	9.78109	9.60723	9.95046	10.7325
sp|O43795|MYO1B_HUMAN	O43795	10.3856	10.0225	10.4168	10.7203	15.0265	9.84346	12.4604	10.4851	10.3771	15.4622	10.026	7.96907	8.83464	9.59186	11.1786	10.0139	11.7109	6.79335	10.5191	8.83874	11.3679	9.4377	1.20452	0.0215637	0.0664203	2	sp|O43795|MYO1B_HUMAN	MYO1B	Unconventional myosin-Ib OS=Homo sapiens OX=9606 GN=MYO1B PE=1 SV=3	20	14	9.5432	9.55392	10.1225	10.1618	14.5424	9.78353	7.96907	8.62519	8.99461	10.7038	9.13436	11.2869	9.79167	9.45187	13.7366	9.97852	11.4211
sp|O43808|PM34_HUMAN	O43808	9.55605	9.48091	8.63627	9.85494	9.02245	10.8972	12.2914	10.988	10.1536	7.59727	12.7249	12.5563	11.169	10.2287	10.7009	4.80269	10.9159	17.8274	10.0128	10.4134	9.76685	10.6649	1.09194	0.428707	0.562012		sp|O43808|PM34_HUMAN	SLC25A17	Peroxisomal membrane protein PMP34 OS=Homo sapiens OX=9606 GN=SLC25A17 PE=1 SV=1	1	1	8.78094	9.03766	8.39224	9.34148	8.73177	12.4172	12.5563	10.9042	9.59178	10.2464	10.1122	11.1338	10.2613	9.24829	6.74942	4.78571	10.6458
sp|O43809|CPSF5_HUMAN	O43809	13.3232	12.2853	12.0512	11.565	11.2913	15.1387	10.2328	13.8125	13.4983	11.1729	7.63824	9.06385	8.15208	10.0771	8.89807	4.69748	7.31513	9.77146	10.037	11.0147	12.3586	8.46024	1.46079	0.000297734	0.00360333	2	sp|O43809|CPSF5_HUMAN	NUDT21	Cleavage and polyadenylation specificity factor subunit 5 OS=Homo sapiens OX=9606 GN=NUDT21 PE=1 SV=1	11	11	12.2425	11.7109	11.7107	10.9624	10.9275	7.45352	9.06385	7.95881	9.44968	8.52014	14.0481	9.26906	12.899	12.2947	9.92601	4.68087	7.13412
sp|O43813|LANC1_HUMAN	O43813	8.30444	9.55021	8.14412	8.91547	9.98812	6.00381	10.0113	11.1866	11.8677	15.4376	11.6414	10.5684	9.58105	13.421	13.9595	8.67642	12.2238	8.17916	12.5095	10.2571	9.66131	10.9411	1.13246	0.222944	0.355332		sp|O43813|LANC1_HUMAN	LANCL1	Glutathione S-transferase LANCL1 OS=Homo sapiens OX=9606 GN=LANCL1 PE=1 SV=1	7	6	7.63085	9.10372	7.914	8.45096	9.66633	11.3599	10.5684	9.3539	12.5853	13.3666	5.57131	9.06843	10.4468	10.8095	13.7148	8.64574	11.9213
sp|O43815|STRN_HUMAN	O43815	10.599	10.1801	10.302	10.1353	10.5659	8.37718	8.90052	9.69264	9.45719	9.62044	10.9722	10.1437	10.7829	10.169	10.2336	14.342	12.7685	11.6696	10.2702	10.359	9.75797	11.1	1.13753	0.00906834	0.0363145		sp|O43815|STRN_HUMAN	STRN	Striatin OS=Homo sapiens OX=9606 GN=STRN PE=1 SV=4	15	19	9.73928	9.7042	10.0109	9.60726	10.2255	10.7069	10.1437	10.5273	9.53581	9.79899	7.77371	8.06225	9.05163	8.61395	8.54681	14.2913	12.4525
sp|O43818|U3IP2_HUMAN	O43818	11.7347	12.2745	16.3932	10.0203	14.5784	19.7541	9.12707	8.02381	7.28179	8.88572	7.08171	9.00743	9.2248	7.2102	6.57353	6.98479	11.9889	11.2119	11.2687	11.4201	11.2435	8.96932	1.25356	0.0925936	0.189396		sp|O43818|U3IP2_HUMAN	RRP9	U3 small nucleolar RNA-interacting protein 2 OS=Homo sapiens OX=9606 GN=RRP9 PE=1 SV=1	2	1	10.7829	11.7006	15.93	9.49827	14.1087	6.91045	9.00743	9.0061	6.76125	6.29433	18.3311	8.26747	7.49316	6.63251	7.89408	6.9601	11.6922
sp|O43819|SCO2_HUMAN	O43819						13.7848	11.8772	10.152	10.5445	10.3498						7.35907	8.29128	8.72801	12.9855	12.2763	11.2648	9.6778	1.16399	0.26556	0.401932		sp|O43819|SCO2_HUMAN	SCO2	Protein SCO2 homolog, mitochondrial OS=Homo sapiens OX=9606 GN=SCO2 PE=1 SV=3	0	2	0	0	0	0	0	0	0	0	0	0	12.7918	10.7586	9.48062	9.60427	9.19475	7.33305	8.08611
sp|O43822|CF410_HUMAN	O43822	9.15553	9.09352	10.0225	10.3426	9.5317						10.939	11.3325	12.3029	10.213	11.024						9.61696	11.142	1.15857	0.00562404	0.0266784		sp|O43822|CF410_HUMAN	CFAP410	Cilia- and flagella-associated protein 410 OS=Homo sapiens OX=9606 GN=CFAP410 PE=1 SV=1	2	0	8.41291	8.66838	9.73927	9.8037	9.22461	10.6745	11.3325	12.0112	9.57712	10.5558	0	0	0	0	0	0	0
sp|O43823|AKAP8_HUMAN	O43823	11.2304	13.1311	11.6106	10.8554	12.036	11.7684	9.11305	11.1163	11.9294	12.0142	8.30069	9.11832	8.04486	9.50187	10.4019	8.82314	8.69371	11.3696	10.7578	10.6247	11.4349	9.50186	1.20344	0.00124751	0.00947786	1	sp|O43823|AKAP8_HUMAN	AKAP8	A-kinase anchor protein 8 OS=Homo sapiens OX=9606 GN=AKAP8 PE=1 SV=1	4	3	10.3195	12.5172	11.2825	10.2898	11.6482	8.09995	9.11832	7.85413	8.91023	9.96011	10.9206	8.25477	10.3811	10.8657	10.6734	8.79195	8.47859
sp|O43824|GTPB6_HUMAN	O43824	10.3927	11.4512	10.4943	12.6521	11.1015						9.17745	10.2345	9.11378	8.50543	11.0037						11.1896	9.5663	1.16969	0.0270361	0.0777059		sp|O43824|GTPB6_HUMAN	GTPBP6	Putative GTP-binding protein 6 OS=Homo sapiens OX=9606 GN=GTPBP6 PE=2 SV=4	4	0	9.54969	10.9158	10.1978	11.9929	10.7438	8.95551	10.2345	8.89771	7.97583	10.5363	0	0	0	0	0	0	0
sp|O43826|G6PT1_HUMAN	O43826	11.5553	11.8341	11.2495	11.9269	12.1926	19.6729	13.8532	9.45573	10.0142	11.77	10.3028	8.91438	8.93057	8.08868	9.18242	8.08535	8.99457	6.57198	9.75001	8.53895	12.1121	8.67869	1.39561	0.000297631	0.00360333	2	sp|O43826|G6PT1_HUMAN	SLC37A4	Glucose-6-phosphate exchanger SLC37A4 OS=Homo sapiens OX=9606 GN=SLC37A4 PE=1 SV=1	6	3	10.618	11.2808	10.9316	11.3055	11.7998	10.0536	8.91438	8.71884	7.58503	8.79242	18.2557	12.5485	8.83039	9.12127	10.4565	8.05676	8.772
sp|O43827|ANGL7_HUMAN	O43827	14.1752	12.6319	8.96377	10.2192	10.3392						7.00233	5.90876	6.16906	11.5873	17.6493						11.1142	8.78079	1.26574	0.337338	0.475719		sp|O43827|ANGL7_HUMAN	ANGPTL7	Angiopoietin-related protein 7 OS=Homo sapiens OX=9606 GN=ANGPTL7 PE=1 SV=1	2	0	13.0254	12.0413	8.71049	9.68675	10.0061	6.83299	5.90876	6.0228	10.8658	16.8997	0	0	0	0	0	0	0
sp|O43829|ZBT14_HUMAN	O43829	9.94409	13.6308	13.1023	12.7586	12.4951						8.88428	8.73554	7.70966	6.87826	9.99309						12.3139	8.37192	1.47086	0.00182402	0.0123085		sp|O43829|ZBT14_HUMAN	ZBTB14	Zinc finger and BTB domain-containing protein 14 OS=Homo sapiens OX=9606 GN=ZBTB14 PE=1 SV=2	1	0	9.13751	12.9935	12.7321	12.0939	12.0925	8.66943	8.73554	7.52688	6.44998	9.56865	0	0	0	0	0	0	0
sp|O43837|IDH3B_HUMAN	O43837	12.005	10.8155	11.7869	10.7963	10.1218	18.182	11.1685	8.73458	8.85739	9.51018	10.1145	9.83195	9.59308	8.22281	10.8582	8.50608	9.30078	9.76513	11.2222	10.9269	10.959	9.78773	1.11967	0.142896	0.257604		sp|O43837|IDH3B_HUMAN	IDH3B	Isocitrate dehydrogenase [NAD] subunit beta, mitochondrial OS=Homo sapiens OX=9606 GN=IDH3B PE=1 SV=2	15	19	11.0313	10.3099	11.4538	10.2338	9.79574	9.86993	9.83195	9.36564	7.71081	10.397	16.8722	10.1166	8.15693	8.06763	8.44885	8.47601	9.07063
sp|O43847|NRDC_HUMAN	O43847	7.74936	9.23641	8.70954	9.08196	8.75065	8.70271	12.3403	13.7062	13.4687	11.645	12.1367	11.9234	12.6119	13.0321	10.6874	8.29782	8.83548	9.6673	9.88829	9.91248	10.1353	10.5851	1.04439	0.606737	0.718579		sp|O43847|NRDC_HUMAN	NRDC	Nardilysin OS=Homo sapiens OX=9606 GN=NRDC PE=1 SV=3	10	12	7.1208	8.80459	8.46344	8.60878	8.46873	11.8432	11.9234	12.3129	12.2206	10.2335	8.07579	11.1781	12.7998	12.2678	10.3454	8.26848	8.61685
sp|O43852|CALU_HUMAN	O43852	11.424	10.4103	11.4427	11.4927	9.11477	18.733	14.6176	9.53559	9.65663	9.6686	11.2822	10.056	9.73186	9.25349	9.92221	14.7673	8.27738	7.25142	6.72743	7.03723	11.3266	9.18079	1.23373	0.0595598	0.136885		sp|O43852|CALU_HUMAN	CALU	Calumenin OS=Homo sapiens OX=9606 GN=CALU PE=1 SV=2	102	73	10.4974	9.92362	11.1194	10.8939	8.82112	11.0094	10.056	9.50113	8.67731	9.50078	17.3835	13.2409	8.90496	8.7956	8.58959	14.7151	8.07256
sp|O43854|EDIL3_HUMAN	O43854	7.61704	9.60689	7.42087	9.8458	7.71389	7.40527	17.7652	8.3348	7.94148	15.6987	15.3998	8.56752	10.9844	18.8138	8.22169	16.4304	10.3295	6.74779	8.38302	7.28806	9.44304	10.4604	1.10774	0.509354	0.635834		sp|O43854|EDIL3_HUMAN	EDIL3	EGF-like repeat and discoidin I-like domain-containing protein 3 OS=Homo sapiens OX=9606 GN=EDIL3 PE=1 SV=1	14	12	6.99921	9.15775	7.21118	9.33282	7.46537	15.0274	8.56752	10.724	17.6423	7.87249	6.87181	16.092	7.78359	7.23338	13.9467	16.3723	10.0739
sp|O43861|ATP9B_HUMAN	O43861	5.62325	12.2301	9.61398	12.1648	12.0139	11.2171	17.3677	13.5145	12.5963	7.777	18.039	13.1923	10.7989	5.27923	4.58043	5.9824	7.48094	8.73766	11.9296	10.0302	10.9562	8.83803	1.23966	0.223011	0.355332		sp|O43861|ATP9B_HUMAN	ATP9B	Probable phospholipid-transporting ATPase IIB OS=Homo sapiens OX=9606 GN=ATP9B PE=2 SV=4	4	4	5.16714	11.6583	9.34232	11.531	11.6268	17.6028	13.1923	10.5429	4.95051	4.38589	10.409	15.732	12.6207	11.4732	6.90909	5.96125	7.29583
sp|O43865|SAHH2_HUMAN	O43865	11.6769	9.77231	10.5848	10.3016	10.6636	8.09047	9.03858	9.63233	9.33584	10.8228	9.41333	7.46046	10.0957	11.0988	13.2362	9.37609	12.6029	12.2183	12.7901	11.8216	9.94286	10.8561	1.09185	0.199821	0.328923		sp|O43865|SAHH2_HUMAN	AHCYL1	S-adenosylhomocysteine hydrolase-like protein 1 OS=Homo sapiens OX=9606 GN=AHCYL1 PE=1 SV=2	9	18	10.7298	9.31544	10.2857	9.76488	10.32	9.18569	7.46046	9.85639	10.4077	12.674	7.50765	8.18731	8.99531	8.50342	9.615	9.34294	12.291
sp|O43895|XPP2_HUMAN	O43895						18.0716	15.4824	13.3161	13.4879	15.36						10.4344	10.3828	3.727	5.13693	1.81962	15.0491	5.19237	2.89831	0.0110318	0.041451		sp|O43895|XPP2_HUMAN	XPNPEP2	Xaa-Pro aminopeptidase 2 OS=Homo sapiens OX=9606 GN=XPNPEP2 PE=1 SV=3	0	2	0	0	0	0	0	0	0	0	0	0	16.7698	14.0242	12.4355	12.2853	13.6458	10.3975	10.1259
sp|O43896|KIF1C_HUMAN	O43896	8.66972	9.44535	7.96806	8.27441	7.60651	9.50337	9.32195	9.01621	9.68549	9.15121	16.7281	11.5731	12.8819	10.2251	10.465	11.8606	12.4732	12.1468	11.1156	11.2956	8.83793	11.9665	1.35399	1.29436e-05	0.000585688	4	sp|O43896|KIF1C_HUMAN	KIF1C	Kinesin-like protein KIF1C OS=Homo sapiens OX=9606 GN=KIF1C PE=1 SV=3	2	5	7.96651	9.00376	7.74291	7.8433	7.36145	16.3236	11.5731	12.5765	9.58844	10.0205	8.81877	8.44399	8.41993	8.82189	8.12994	11.8187	12.1646
sp|O43897|TLL1_HUMAN	O43897	19.1491	11.4805	14.0854	10.2368	10.9489						8.16935	6.2966	8.36346	8.65331	7.23239						12.8258	7.69181	1.66746	0.00407732	0.0212084		sp|O43897|TLL1_HUMAN	TLL1	Tolloid-like protein 1 OS=Homo sapiens OX=9606 GN=TLL1 PE=1 SV=1	3	0	17.5959	10.9438	13.6874	9.70348	10.5962	7.97179	6.2966	8.16518	8.1145	6.92521	0	0	0	0	0	0	0
sp|O43903|GAS2_HUMAN	O43903	10.4112	8.58038	8.26525	8.87334	8.3338	10.4216	12.9649	11.788	12.9651	11.6749	14.0288	8.65479	13.7189	12.3532	10.8866	7.70468	8.03717	9.57475	10.4675	10.9244	10.2787	10.4267	1.01441	0.869512	0.915371		sp|O43903|GAS2_HUMAN	GAS2	Growth arrest-specific protein 2 OS=Homo sapiens OX=9606 GN=GAS2 PE=1 SV=1	2	2	9.56674	8.17923	8.0317	8.41103	8.06531	13.6895	8.65479	13.3936	11.584	10.4242	9.67087	11.7438	11.0084	11.8091	10.372	7.67744	7.83829
sp|O43909|EXTL3_HUMAN	O43909	13.0356	11.9003	12.1497	12.7032	9.87153	19.8293	19.9072	8.40552	8.17162	7.71551	7.21167	9.19878	7.81188	10.3747	10.1148	10.2937	8.49295	7.82816	8.19278	7.6784	11.733	8.64857	1.35664	0.0160493	0.0541503	2	sp|O43909|EXTL3_HUMAN	EXTL3	Exostosin-like 3 OS=Homo sapiens OX=9606 GN=EXTL3 PE=1 SV=1	4	2	11.9783	11.3439	11.8064	12.0413	9.5535	7.03727	9.19878	7.62667	9.72872	9.68515	18.4008	18.0323	7.84963	7.443	6.85447	10.2573	8.28279
sp|O43913|ORC5_HUMAN	O43913	10.5134	9.7586	10.7935	12.5363	11.0581	10.5182	10.024	11.0974	11.3668	12.5262	9.02015	9.78516	9.39708	10.5965	10.7207	8.48747	11.3751	9.42755	11.1485	10.2741	10.9845	9.98217	1.10041	0.0284751	0.0804926		sp|O43913|ORC5_HUMAN	ORC5	Origin recognition complex subunit 5 OS=Homo sapiens OX=9606 GN=ORC5 PE=1 SV=1	2	2	9.66066	9.30237	10.4885	11.8831	10.7018	8.80202	9.78516	9.17429	9.9367	10.2654	9.76045	9.07988	10.3635	10.3533	11.1283	8.45746	11.0936
sp|O43920|NDUS5_HUMAN	O43920	14.3006	11.9697	10.8976	13.9562	13.7167	9.62144	9.0786	8.98299	9.14902	10.4221	6.79537	7.20083	6.15526	8.36881	11.1398	12.4337	11.6152	11.2931	11.3721	11.6722	11.0327	9.5144	1.15957	0.167906	0.29021		sp|O43920|NDUS5_HUMAN	NDUFS5	NADH dehydrogenase [ubiquinone] iron-sulfur protein 5 OS=Homo sapiens OX=9606 GN=NDUFS5 PE=1 SV=3	6	5	13.1407	11.4101	10.5897	13.2291	13.2748	6.63104	7.20083	6.00933	7.84772	10.6667	8.92833	8.22356	8.38891	8.33325	9.25902	12.3897	11.3278
sp|O43924|PDE6D_HUMAN	O43924	10.2994	9.98768	9.70866	10.0983	10.0817	8.42507	9.04793	9.25884	8.77466	9.87608	9.58468	10.1646	10.5308	11.595	12.094	14.5597	13.909	10.8692	10.2247	10.4868	9.53611	11.3003	1.185	0.00275806	0.0162199		sp|O43924|PDE6D_HUMAN	PDE6D	Retinal rod rhodopsin-sensitive cGMP 3',5'-cyclic phosphodiesterase subunit delta OS=Homo sapiens OX=9606 GN=PDE6D PE=1 SV=1	4	4	9.46403	9.52074	9.43433	9.57216	9.75688	9.35289	10.1646	10.2811	10.873	11.5803	7.81815	8.19578	8.64652	7.99227	8.77392	14.5082	13.5648
sp|O43933|PEX1_HUMAN	O43933	9.33931	13.2548	12.2366	12.1759	10.0337	10.1244	11.383	12.6628	12.4553	9.5791	8.43462	12.6482	8.06412	8.36721	9.44336	11.1415	6.44065	11.0719	10.0832	11.1822	11.2412	9.51608	1.18129	0.0414673	0.105506		sp|O43933|PEX1_HUMAN	PEX1	Peroxisome biogenesis factor 1 OS=Homo sapiens OX=9606 GN=PEX1 PE=1 SV=1	1	1	8.58178	12.6351	11.8908	11.5415	9.71048	8.23065	12.6482	7.87293	7.84622	9.04227	9.39505	10.3109	11.8254	11.3447	8.51008	11.1021	6.28128
sp|O60216|RAD21_HUMAN	O60216	11.0221	11.0907	11.2552	10.0419	11.2987	15.24	10.9132	10.9178	10.0482	9.68074	10.2838	11.1239	9.80421	8.61308	9.50515	11.2237	9.7109	10.0716	9.13466	9.12433	11.0675	9.82727	1.1262	0.0231752	0.0697182		sp|O60216|RAD21_HUMAN	RAD21	Double-strand-break repair protein rad21 homolog OS=Homo sapiens OX=9606 GN=RAD21 PE=1 SV=2	20	19	10.1281	10.5722	10.9372	9.51873	10.9347	10.0351	11.1239	9.57177	8.07678	9.10144	14.1421	9.88541	10.1958	9.1523	8.60038	11.184	9.47061
sp|O60218|AK1BA_HUMAN	O60218	4.37027	3.69921	12.3432	2.95556	7.95828						14.3747	8.56353	14.0499	9.22731	26.1089						5.42376	13.3033	2.45277	0.0265701	0.0767778		sp|O60218|AK1BA_HUMAN	AKR1B10	Aldo-keto reductase family 1 member B10 OS=Homo sapiens OX=9606 GN=AKR1B10 PE=1 SV=2	1	0	4.01579	3.52627	11.9944	2.80157	7.70189	14.0271	8.56353	13.7168	8.65276	25	0	0	0	0	0	0	0
sp|O60220|TIM8A_HUMAN	O60220	10.3452	11.2234	12.3691	12.6208	9.82857	7.80699	7.31571	7.01625	7.15257	7.35207	8.99033	9.33755	9.16579	9.812	10.4859	12.3079	12.3006	14.8562	14.9755	13.9416	9.0667	11.4032	1.2577	0.032635	0.0889567	3	sp|O60220|TIM8A_HUMAN	TIMM8A	Mitochondrial import inner membrane translocase subunit Tim8 A OS=Homo sapiens OX=9606 GN=TIMM8A PE=1 SV=1	2	6	9.50606	10.6987	12.0196	11.9632	9.51192	8.77292	9.33755	8.94848	9.20105	10.0405	7.24459	6.6267	6.55224	6.51482	6.53159	12.2644	11.9962
sp|O60231|DHX16_HUMAN	O60231	10.3001	10.4988	10.0214	9.59472	10.3805	12.4061	12.0258	10.8092	9.8214	9.42193	10.0531	10.6018	11.5944	10.8347	10.1897	10.4037	10.6366	9.64212	10.7013	10.1664	10.4882	10.4705	1.00169	0.956714	0.971351		sp|O60231|DHX16_HUMAN	DHX16	Pre-mRNA-splicing factor ATP-dependent RNA helicase DHX16 OS=Homo sapiens OX=9606 GN=DHX16 PE=1 SV=2	5	5	9.46465	10.008	9.73822	9.09482	10.0461	9.80995	10.6018	11.3195	10.1601	9.75687	11.5124	10.8932	10.0943	8.94568	8.37045	10.3669	10.3734
sp|O60232|ZNRD2_HUMAN	O60232	12.2032	10.586	6.40402	8.60395	12.2486						14.0214	7.18569	6.80397	13.5789	12.7606						9.72946	10.3503	1.06381	0.763534	0.839479		sp|O60232|ZNRD2_HUMAN	ZNRD2	Protein ZNRD2 OS=Homo sapiens OX=9606 GN=ZNRD2 PE=1 SV=1	1	0	11.2134	10.0911	6.22307	8.15567	11.854	13.6823	7.18569	6.64266	12.7334	12.2186	0	0	0	0	0	0	0
sp|O60238|BNI3L_HUMAN	O60238	6.75672	11.8048	10.6454	14.2986	12.1215	18.567	15.6719	8.31532	8.62011	11.8691	7.8908	10.181	7.71438	12.6271	10.0842	9.69857	9.45056	9.1796	6.76551	8.39823	11.3801	9.07117	1.25454	0.0573025	0.132983		sp|O60238|BNI3L_HUMAN	BNIP3L	BCL2/adenovirus E1B 19 kDa protein-interacting protein 3-like OS=Homo sapiens OX=9606 GN=BNIP3L PE=1 SV=1	1	4	6.20867	11.2529	10.3446	13.5536	11.731	7.69998	10.181	7.53148	11.8409	9.65585	17.2295	14.1959	7.7654	7.8515	10.5445	9.66428	9.21671
sp|O60240|PLIN1_HUMAN	O60240						0.442702	5.618	0.58769	0.74142	94.3653						2.93873	1.54715	2.01848	1.53032	1.62696	2.52315	1.86971	1.34949	0.62088	0.72991		sp|O60240|PLIN1_HUMAN	PLIN1	Perilipin-1 OS=Homo sapiens OX=9606 GN=PLIN1 PE=1 SV=2	0	3	0	0	0	0	0	0	0	0	0	0	0.410811	5.08889	0.548824	0.675312	83.8342	2.92834	1.50887
sp|O60243|H6ST1_HUMAN	O60243	7.37767	8.39962	12.2455	13.0344	11.0723						14.1918	11.2853	8.04449	12.232	6.04197						10.1835	9.90251	1.02838	0.891121	0.927717		sp|O60243|H6ST1_HUMAN	HS6ST1	Heparan-sulfate 6-O-sulfotransferase 1 OS=Homo sapiens OX=9606 GN=HS6ST1 PE=1 SV=5	1	0	6.77926	8.00692	11.8995	12.3553	10.7156	13.8486	11.2853	7.85377	11.4704	5.78535	0	0	0	0	0	0	0
sp|O60244|MED14_HUMAN	O60244	8.82514	11.3663	9.45515	10.527	10.4891						12.7231	11.864	10.8436	8.25672	9.53456						10.0928	10.5201	1.04234	0.651714	0.754841		sp|O60244|MED14_HUMAN	MED14	Mediator of RNA polymerase II transcription subunit 14 OS=Homo sapiens OX=9606 GN=MED14 PE=1 SV=2	1	0	8.10932	10.8349	9.18798	9.97855	10.1512	12.4154	11.864	10.5865	7.74261	9.1296	0	0	0	0	0	0	0
sp|O60245|PCDH7_HUMAN	O60245	11.2805	12.3526	10.9423	10.3292	8.06866	10.4566	10.4191	12.4827	11.8367	12.0734	10.2463	9.97885	10.5308	12.3	8.18142	10.2178	9.35937	11.1962	8.63656	9.52812	10.9462	9.95375	1.09971	0.103097	0.204394		sp|O60245|PCDH7_HUMAN	PCDH7	Protocadherin-7 OS=Homo sapiens OX=9606 GN=PCDH7 PE=1 SV=2	19	12	10.3655	11.7751	10.6331	9.791	7.80871	9.99855	9.97885	10.2811	11.5341	7.83393	9.70333	9.43781	11.6572	10.7813	10.726	10.1817	9.12777
sp|O60256|KPRB_HUMAN	O60256	10.1306	10.2731	10.2478	9.64734	10.5864	10.088	10.4327	13.1252	12.5396	11.2295	10.6409	11.9334	10.5448	10.9984	9.00711	7.60132	7.86534	10.8637	11.4044	11.1815	10.7797	10.0945	1.06788	0.284119	0.420784		sp|O60256|KPRB_HUMAN	PRPSAP2	Phosphoribosyl pyrophosphate synthase-associated protein 2 OS=Homo sapiens OX=9606 GN=PRPSAP2 PE=1 SV=1	21	19	9.30893	9.7928	9.95827	9.1447	10.2453	10.3836	11.9334	10.2948	10.3136	8.62455	9.36132	9.4501	12.2572	11.4215	9.97631	7.57445	7.67071
sp|O60262|GBG7_HUMAN	O60262						4.46795	3.95529	3.12943	3.53272	2.456						16.5671	10.7483	20.8414	18.2219	19.8966	3.4373	16.8181	4.89282	7.36533e-06	0.000438249		sp|O60262|GBG7_HUMAN	GNG7	Guanine nucleotide-binding protein G(I)/G(S)/G(O) subunit gamma-7 OS=Homo sapiens OX=9606 GN=GNG7 PE=1 SV=1	0	2	0	0	0	0	0	0	0	0	0	0	4.14609	3.58277	2.92247	3.21773	2.18191	16.5085	10.4823
sp|O60264|SMCA5_HUMAN	O60264	14.1076	14.2082	12.4805	13.1083	12.2035	15.3548	10.3119	12.9497	12.7441	10.8648	6.71015	7.87025	7.01285	9.04037	7.71485	7.47484	7.42085	9.33297	10.1193	9.94501	12.751	8.18269	1.55828	7.64249e-07	0.000118615	1	sp|O60264|SMCA5_HUMAN	SMARCA5	SWI/SNF-related matrix-associated actin-dependent regulator of chromatin subfamily A member 5 OS=Homo sapiens OX=9606 GN=SMARCA5 PE=1 SV=1	23	17	12.9633	13.5439	12.1278	12.4253	11.8103	6.54788	7.87025	6.84659	8.47746	7.38718	14.2487	9.34074	12.0933	11.6078	9.65232	7.44841	7.23722
sp|O60268|K0513_HUMAN	O60268	6.64859	5.20835	8.43354	8.25168	5.59718						11.9591	15.0289	16.6598	11.5682	14.2872						6.69869	13.769	2.05547	0.000306075	0.0036599		sp|O60268|K0513_HUMAN	KIAA0513	Uncharacterized protein KIAA0513 OS=Homo sapiens OX=9606 GN=KIAA0513 PE=1 SV=1	1	0	6.10931	4.96485	8.19524	7.82176	5.41685	11.6699	15.0289	16.2648	10.8479	13.6804	0	0	0	0	0	0	0
sp|O60271|JIP4_HUMAN	O60271	8.76871	8.98015	9.0745	8.82273	8.53561	8.08734	11.9154	12.7848	12.3089	10.4953	11.8812	12.1129	12.4293	11.4296	11.8859	10.0238	9.978	10.5952	10.2097	9.74659	9.84624	10.9867	1.11583	0.0906667	0.186963		sp|O60271|JIP4_HUMAN	SPAG9	C-Jun-amino-terminal kinase-interacting protein 4 OS=Homo sapiens OX=9606 GN=SPAG9 PE=1 SV=4	27	33	8.05747	8.56031	8.81809	8.36305	8.26062	11.5939	12.1129	12.1346	10.7179	11.3811	7.50475	10.7932	11.9393	11.2114	9.32401	9.98841	9.7311
sp|O60282|KIF5C_HUMAN	O60282	9.76825	10.7219	9.29356	11.3312	13.4183	13.479	18.1949	10.1148	12.4543	20.333	8.437	6.81381	6.70278	10.2467	17.5936	14.9671	5.64633	4.06338	5.56637	2.52855	12.4978	7.12198	1.75482	0.0120166	0.0440628	2	sp|O60282|KIF5C_HUMAN	KIF5C	Kinesin heavy chain isoform 5C OS=Homo sapiens OX=9606 GN=KIF5C PE=1 SV=1	5	1	8.97593	10.2206	9.03096	10.7408	12.986	8.23297	6.81381	6.54387	9.60868	16.8463	12.508	16.4813	9.44587	11.3438	18.0639	14.9142	5.50661
sp|O60287|NPA1P_HUMAN	O60287	16.3748	15.6634	14.9074	11.1157	8.0573	22.4612	13.7613	11.3688	13.1738	9.53476	7.33529	7.76651	9.83756	7.87496	5.52308	5.37434	5.77325	6.32072	10.1094	9.12715	13.1202	7.31903	1.79262	0.000117505	0.00213786	1	sp|O60287|NPA1P_HUMAN	URB1	Nucleolar pre-ribosomal-associated protein 1 OS=Homo sapiens OX=9606 GN=URB1 PE=1 SV=4	7	5	15.0466	14.9311	14.4862	10.5366	7.79772	7.1579	7.76651	9.60433	7.38462	5.2885	20.8431	12.4652	10.6169	11.9992	8.47069	5.35534	5.63039
sp|O60291|MGRN1_HUMAN	O60291	9.33968	10.722	11.2908	11.366	12.4462	8.3687	13.6542	11.0259	10.7639	9.10924	9.97482	9.5099	10.1112	10.9379	8.39099	7.20474	6.28371	12.2294	13.0518	14.4798	10.7048	9.91814	1.07931	0.435745	0.568119		sp|O60291|MGRN1_HUMAN	MGRN1	E3 ubiquitin-protein ligase MGRN1 OS=Homo sapiens OX=9606 GN=MGRN1 PE=1 SV=2	1	1	8.58212	10.2207	10.9718	10.7738	12.0452	9.7336	9.5099	9.87148	10.2568	8.0346	7.76584	12.3682	10.2967	9.80416	8.09266	7.17927	6.12822
sp|O60293|ZC3H1_HUMAN	O60293						7.12784	5.76131	6.19543	6.06629	4.945						10.2935	10.5777	9.06282	25.2954	19.6251	5.97762	13.7409	2.29872	0.00469542	0.0233848		sp|O60293|ZC3H1_HUMAN	ZFC3H1	Zinc finger C3H1 domain-containing protein OS=Homo sapiens OX=9606 GN=ZFC3H1 PE=1 SV=3	0	2	0	0	0	0	0	0	0	0	0	0	6.61437	5.2187	5.7857	5.52539	4.39314	10.2571	10.316
sp|O60306|AQR_HUMAN	O60306	12.0336	12.1244	11.9164	13.2955	12.1015	9.47796	8.09612	10.9767	10.8005	10.9541	7.9826	8.39799	7.80821	9.05613	9.59527	9.75052	10.7588	11.7575	11.409	11.8826	11.0796	9.73002	1.1387	0.0702007	0.154882		sp|O60306|AQR_HUMAN	AQR	RNA helicase aquarius OS=Homo sapiens OX=9606 GN=AQR PE=1 SV=4	10	8	11.0575	11.5576	11.5797	12.6028	11.7116	7.78956	8.39799	7.62309	8.49224	9.18773	8.79519	7.33361	10.2508	9.83747	9.73164	9.71605	10.4926
sp|O60308|CE104_HUMAN	O60308						9.56527	13.5391	10.9617	11.3254	10.6898						9.19515	8.56543	7.53985	11.1014	13.855	11.1439	9.82043	1.13477	0.327129	0.465709		sp|O60308|CE104_HUMAN	CEP104	Centrosomal protein of 104 kDa OS=Homo sapiens OX=9606 GN=CEP104 PE=1 SV=1	0	1	0	0	0	0	0	0	0	0	0	0	8.87621	12.264	10.2368	10.3156	9.49684	9.16264	8.35348
sp|O60313|OPA1_HUMAN	O60313	12.7237	12.4428	12.1886	12.1713	11.3148	13.7184	9.61441	10.3034	10.7569	10.1586	8.49493	8.26656	8.22048	10.2163	8.30643	9.24344	11.1211	9.87746	11.0687	10.2014	11.4715	9.43946	1.21527	0.00162826	0.0114238	1	sp|O60313|OPA1_HUMAN	OPA1	Dynamin-like 120 kDa protein, mitochondrial OS=Homo sapiens OX=9606 GN=OPA1 PE=1 SV=3	46	42	11.6917	11.8611	11.8442	11.5372	10.9503	8.2895	8.26656	8.02559	9.58019	7.95363	12.7302	8.70891	9.622	9.79773	9.0249	9.21076	10.8459
sp|O60318|GANP_HUMAN	O60318	10.9182	10.5867	9.97192	10.2786	9.34899	7.58255	7.86869	9.83247	8.92051	7.73478	11.5423	13.2373	12.3535	8.34318	7.32072	17.9329	11.736	11.645	11.3239	10.5166	9.22913	11.29	1.2233	0.0342208	0.0920585	3	sp|O60318|GANP_HUMAN	MCM3AP	Germinal-center associated nuclear protein OS=Homo sapiens OX=9606 GN=MCM3AP PE=1 SV=2	6	2	10.0326	10.0918	9.69015	9.74307	9.04779	11.2632	13.2373	12.0606	7.82368	7.00979	7.03632	7.1276	9.18221	8.12512	6.87159	17.8695	11.4456
sp|O60331|PI51C_HUMAN	O60331	7.93747	8.83165	9.16828	10.3174	10.6823	7.66266	11.4661	10.3478	9.51721	10.1103	12.6131	11.236	10.5672	11.8995	10.6952	11.4403	13.015	11.7008	9.81283	10.6671	9.53271	11.3267	1.1882	0.00255176	0.0154104		sp|O60331|PI51C_HUMAN	PIP5K1C	Phosphatidylinositol 4-phosphate 5-kinase type-1 gamma OS=Homo sapiens OX=9606 GN=PIP5K1C PE=1 SV=2	4	8	7.29365	8.41876	8.90922	9.77986	10.3381	12.3081	11.236	10.3167	11.1586	10.2409	7.11066	10.3862	9.66347	8.66861	8.98201	11.3999	12.6929
sp|O60333|KIF1B_HUMAN	O60333	10.8538	9.68966	11.2176	9.33259	9.3954	12.1645	12.8748	12.018	12.2976	10.6191	10.6244	12.463	10.9758	10.2365	9.19555	6.19988	7.06763	9.90873	11.9242	11.4668	10.9781	9.79409	1.12089	0.175525	0.300105		sp|O60333|KIF1B_HUMAN	KIF1B	Kinesin-like protein KIF1B OS=Homo sapiens OX=9606 GN=KIF1B PE=1 SV=5	8	7	9.97346	9.23665	10.9006	8.84635	9.09271	10.3675	12.463	10.7156	9.59915	8.80499	11.2882	11.6622	11.2232	11.2011	9.43398	6.17796	6.89274
sp|O60336|MABP1_HUMAN	O60336	8.19787	11.3546	9.87602	9.65073	11.6278	10.1492	14.2064	13.908	11.8557	9.81216	10.943	10.1761	11.7171	10.4205	10.0047	4.77124	8.58003	12.2559	8.83577	12.1076	10.9179	9.69036	1.12668	0.261717	0.398135		sp|O60336|MABP1_HUMAN	MAPKBP1	Mitogen-activated protein kinase-binding protein 1 OS=Homo sapiens OX=9606 GN=MAPKBP1 PE=1 SV=4	2	1	7.53293	10.8238	9.59696	9.14791	11.2532	10.6784	10.1761	11.4393	9.77167	9.57977	9.41808	12.8684	12.9882	10.7986	8.71713	4.75437	8.36772
sp|O60337|MARH6_HUMAN	O60337	10.6057	11.1024	10.1735	11.7293	10.544	9.53292	8.05112	9.66299	8.0063	6.65883	9.20623	11.0851	10.4235	9.65876	9.56664	16.1172	13.5798	11.627	11.2119	10.6289	9.47921	11.1541	1.17669	0.0508304	0.121715		sp|O60337|MARH6_HUMAN	44626	E3 ubiquitin-protein ligase MARCH6 OS=Homo sapiens OX=9606 GN=MARCH6 PE=1 SV=2	4	2	9.74541	10.5833	9.88599	11.1182	10.2043	8.9836	11.0851	10.1764	9.05735	9.16032	8.84619	7.29285	9.02394	7.29242	5.91571	16.0602	13.2438
sp|O60341|KDM1A_HUMAN	O60341	10.9735	12.1018	11.6613	11.9309	12.5437	16.4222	12.4101	10.5399	10.7131	11.067	8.94662	8.85546	8.53071	8.9724	9.68318	8.34034	8.27194	8.59019	9.6428	10.4905	11.9427	9.00861	1.3257	1.18618e-05	0.000556845	1	sp|O60341|KDM1A_HUMAN	KDM1A	Lysine-specific histone demethylase 1A OS=Homo sapiens OX=9606 GN=KDM1A PE=1 SV=2	11	11	10.0834	11.536	11.3318	11.3093	12.1396	8.73026	8.85546	8.32846	8.41373	9.27191	15.2392	11.2413	9.84286	9.75784	9.83196	8.31085	8.06725
sp|O60343|TBCD4_HUMAN	O60343	9.75849	9.08767	7.98019	9.13447	8.95322	6.79788	11.0639	9.11339	8.1659	12.131	13.587	11.0251	11.9361	12.1845	10.3702	15.4197	14.248	12.476	9.13907	6.98221	9.1083	11.473	1.25962	0.0188379	0.060321	4	sp|O60343|TBCD4_HUMAN	TBC1D4	TBC1 domain family member 4 OS=Homo sapiens OX=9606 GN=TBC1D4 PE=1 SV=2	3	1	8.96696	8.66281	7.7547	8.65855	8.66477	13.2584	11.0251	11.6531	11.4258	9.92976	6.30818	10.0219	8.51069	7.43779	10.7772	15.3652	13.8954
sp|O60347|TBC12_HUMAN	O60347	6.47841	6.4321	6.33476	5.24405	5.82211						15.874	19.4809	17.7162	10.7063	9.24013						6.0431	14.0216	2.32026	0.000575171	0.0055722		sp|O60347|TBC12_HUMAN	TBC1D12	TBC1 domain family member 12 OS=Homo sapiens OX=9606 GN=TBC1D12 PE=1 SV=3	1	0	5.95294	6.13139	6.15576	4.97083	5.63454	15.4901	19.4809	17.2962	10.0397	8.84767	0	0	0	0	0	0	0
sp|O60353|FZD6_HUMAN	O60353	11.3807	12.5713	11.4371	12.2103	10.9114						8.31683	11.2925	9.20174	9.5301	7.29215						11.6868	9.03055	1.29414	0.010003	0.0387534		sp|O60353|FZD6_HUMAN	FZD6	Frizzled-6 OS=Homo sapiens OX=9606 GN=FZD6 PE=1 SV=2	1	0	10.4576	11.9836	11.1139	11.5741	10.5599	8.1157	11.2925	8.98358	8.9367	6.98243	0	0	0	0	0	0	0
sp|O60361|NDK8_HUMAN	O60361	10.0576	7.56373	7.67306	7.91032	7.82013	14.1811	17.3108	7.23368	6.94519	17.8394	16.2596	9.34026	15.1437	12.5418	9.68458	10.6262	11.4295	7.77731	7.01679	6.41502	9.7725	10.1735	1.04104	0.800818	0.865827		sp|O60361|NDK8_HUMAN	NME2P1	Putative nucleoside diphosphate kinase OS=Homo sapiens OX=9606 GN=NME2P1 PE=5 SV=1	8	5	9.2418	7.21011	7.45625	7.49818	7.56819	15.8664	9.34026	14.7847	11.7609	9.27325	13.1595	15.6804	6.75529	6.32593	15.8485	10.5886	11.1467
sp|O60427|FADS1_HUMAN	O60427	12.1265	11.9519	12.0421	12.5696	11.3779	12.282	9.09553	11.5866	11.1144	11.9005	7.52532	9.40326	7.62345	9.8929	9.78562	9.14103	9.652	9.13214	10.792	11.5198	11.5631	9.3726	1.23372	0.000653617	0.00603759	1	sp|O60427|FADS1_HUMAN	FADS1	Acyl-CoA (8-3)-desaturase OS=Homo sapiens OX=9606 GN=FADS1 PE=1 SV=3	6	7	11.1429	11.3931	11.7018	11.9147	11.0113	7.34334	9.40326	7.44271	9.27691	9.37	11.3972	8.2389	10.8203	10.1234	10.5724	9.10871	9.41316
sp|O60437|PEPL_HUMAN	O60437	9.98712	8.99419	9.89589	7.81822	11.6099	11.2235	11.9751	9.16919	8.97402	11.4388	11.1449	9.70794	10.5286	9.94349	14.4116	11.8284	9.94977	8.49851	12.1015	10.8864	10.0205	10.796	1.07739	0.257625	0.393601		sp|O60437|PEPL_HUMAN	PPL	Periplakin OS=Homo sapiens OX=9606 GN=PPL PE=1 SV=4	64	59	9.17705	8.5737	9.61627	7.41088	11.2359	10.8754	9.70794	10.279	9.32435	13.7995	10.415	10.8473	8.5628	8.17386	10.1622	11.7866	9.70356
sp|O60443|GSDME_HUMAN	O60443	7.76629	8.98543	8.10988	8.97595	6.74899	7.20089	10.8475	10.0212	10.6239	9.83962	13.4374	12.7122	12.8724	10.9215	13.3097	11.8148	12.1912	12.1906	10.254	10.723	8.8064	11.996	1.36219	6.11313e-05	0.00147588	4	sp|O60443|GSDME_HUMAN	GSDME	Gasdermin-E OS=Homo sapiens OX=9606 GN=GSDME PE=1 SV=2	14	9	7.13635	8.56535	7.88072	8.50829	6.53156	13.1124	12.7122	12.5672	10.2415	12.7444	6.68215	9.8259	9.35849	9.67661	8.74153	11.773	11.8895
sp|O60462|NRP2_HUMAN	O60462	5.64487	8.63452	6.62625	9.50362	6.60276	6.11705	16.9786	10.8371	10.6078	13.9122	17.0664	10.5017	11.6554	16.4635	11.2494	13.7478	10.0135	8.48361	8.16965	7.50699	8.9684	11.073	1.23467	0.17074	0.293773		sp|O60462|NRP2_HUMAN	NRP2	Neuropilin-2 OS=Homo sapiens OX=9606 GN=NRP2 PE=1 SV=3	7	9	5.18701	8.23084	6.43902	9.00847	6.39004	16.6537	10.5017	11.3791	15.4384	10.7716	5.67639	15.3795	10.1204	9.66194	12.3596	13.6992	9.76569
sp|O60476|MA1A2_HUMAN	O60476	11.7371	10.7878	11.0072	10.4509	9.9912	11.7175	11.4099	9.96322	9.52719	9.22463	9.40859	8.8833	10.639	9.98352	11.3277	12.7552	10.61	10.2849	10.3473	9.97837	10.5472	10.3751	1.01659	0.69631	0.786695		sp|O60476|MA1A2_HUMAN	MAN1A2	Mannosyl-oligosaccharide 1,2-alpha-mannosidase IB OS=Homo sapiens OX=9606 GN=MAN1A2 PE=1 SV=1	5	5	10.7851	10.2835	10.6962	9.90636	9.66931	9.18106	8.8833	10.3868	9.36189	10.8466	10.8734	10.3353	9.30431	8.6777	8.19517	12.7101	10.3475
sp|O60478|G137B_HUMAN	O60478						10.6974	8.05326	8.81025	10.7174	8.35237						19.3827	13.0015	9.25194	8.66151	8.35498	9.25609	11.1029	1.19952	0.317827	0.457433		sp|O60478|G137B_HUMAN	GPR137B	Integral membrane protein GPR137B OS=Homo sapiens OX=9606 GN=GPR137B PE=2 SV=1	0	1	0	0	0	0	0	0	0	0	0	0	9.92676	7.29479	8.22759	9.76181	7.42025	19.3142	12.6798
sp|O60486|PLXC1_HUMAN	O60486	9.02506	9.86454	15.6459	9.05102	12.4715	8.36494	8.63784	7.00456	7.11753	7.14021	11.1582	8.96897	11.1291	7.34441	9.23312	21.7762	15.6973	10.1482	9.04059	9.83717	9.13447	10.8827	1.19139	0.190891	0.318991		sp|O60486|PLXC1_HUMAN	PLXNC1	Plexin-C1 OS=Homo sapiens OX=9606 GN=PLXNC1 PE=1 SV=1	3	1	8.29302	9.40336	15.2038	8.57945	12.0697	10.8884	8.96897	10.8652	6.8871	8.84096	7.76235	7.82431	6.54132	6.4829	6.34337	21.6992	15.3089
sp|O60488|ACSL4_HUMAN	O60488	9.45264	9.68636	9.66529	10.7798	10.3508	8.31351	9.83637	9.97336	9.99634	10.3287	10.3412	9.89064	9.27493	11.1057	13.5785	10.8206	12.6113	10.1562	11.7424	11.9982	9.81716	11.0818	1.12882	0.0120022	0.0440314		sp|O60488|ACSL4_HUMAN	ACSL4	Long-chain-fatty-acid--CoA ligase 4 OS=Homo sapiens OX=9606 GN=ACSL4 PE=1 SV=2	5	7	8.68592	9.23351	9.39218	10.2182	10.0173	10.0911	9.89064	9.05504	10.4142	13.0018	7.71462	8.90996	9.31378	9.10502	9.17601	10.7823	12.2992
sp|O60493|SNX3_HUMAN	O60493	7.93729	8.57044	7.74118	8.85998	8.83484	7.43566	13.7603	11.1242	11.1847	13.7388	13.5607	12.2631	12.9995	12.0822	11.0165	10.6868	11.1286	8.55434	9.58823	9.16552	9.6781	10.991	1.13566	0.16414	0.285583		sp|O60493|SNX3_HUMAN	SNX3	Sorting nexin-3 OS=Homo sapiens OX=9606 GN=SNX3 PE=1 SV=3	18	16	7.29348	8.16976	7.52244	8.39836	8.55021	13.2328	12.2631	12.6913	11.3299	10.5486	6.90001	12.4643	10.3885	10.1874	12.2056	10.649	10.8532
sp|O60499|STX10_HUMAN	O60499						6.1247	6.57224	7.13644	8.39835	8.40814						16.1475	15.0816	13.2389	12.2954	11.5018	7.26833	13.5451	1.86358	0.000118714	0.00215441		sp|O60499|STX10_HUMAN	STX10	Syntaxin-10 OS=Homo sapiens OX=9606 GN=STX10 PE=1 SV=1	0	2	0	0	0	0	0	0	0	0	0	0	5.68349	5.95325	6.66448	7.64952	7.4698	16.0904	14.7084
sp|O60502|OGA_HUMAN	O60502	8.33196	8.6222	8.60297	8.95169	8.36237	7.48568	9.48498	11.4691	11.591	9.63253	11.9203	14.2137	13.0041	11.7132	10.0897	11.9121	11.0154	12.0677	10.1456	10.9266	9.17045	11.6413	1.26943	0.000431758	0.00457314	4	sp|O60502|OGA_HUMAN	OGA	Protein O-GlcNAcase OS=Homo sapiens OX=9606 GN=OGA PE=1 SV=2	20	22	7.65614	8.2191	8.35988	8.48529	8.09296	11.632	14.2137	12.6958	10.9839	9.66119	6.94643	8.59167	10.7106	10.5575	8.55755	11.87	10.7428
sp|O60504|VINEX_HUMAN	O60504	15.1381	11.1854	12.2218	10.9001	12.5601	7.86704	12.4345	10.4329	9.32358	11.8358	6.79813	8.11013	7.30478	8.85812	11.3639	12.2825	10.9064	10.5777	10.4242	9.86657	11.2303	9.48738	1.18371	0.0603661	0.13809		sp|O60504|VINEX_HUMAN	SORBS3	Vinexin OS=Homo sapiens OX=9606 GN=SORBS3 PE=1 SV=2	11	11	13.9102	10.6625	11.8765	10.3322	12.1554	6.63373	8.11013	7.1316	8.30656	10.8812	7.30032	11.2634	9.74292	8.49225	10.5149	12.2391	10.6365
sp|O60506|HNRPQ_HUMAN	O60506	11.7601	9.99877	10.9551	10.1604	12.6477	11.0746	11.2355	10.0542	9.60742	11.252	10.9148	8.71663	10.9101	9.37099	8.70938	9.79284	11.5027	10.635	10.5788	10.3035	10.8393	10.1014	1.07304	0.100223	0.200718		sp|O60506|HNRPQ_HUMAN	SYNCRIP	Heterogeneous nuclear ribonucleoprotein Q OS=Homo sapiens OX=9606 GN=SYNCRIP PE=1 SV=2	49	43	10.8062	9.53131	10.6455	9.63102	12.2402	10.6508	8.71663	10.6514	8.7875	8.33947	10.2768	10.1773	9.38928	8.75078	9.99628	9.75822	11.2181
sp|O60507|TPST1_HUMAN	O60507						3.76609	6.57132	11.4823	11.7735	22.2244						10.3603	15.2282	7.00019	10.0448	8.04364	9.42456	9.77473	1.03716	0.932435	0.954654		sp|O60507|TPST1_HUMAN	TPST1	Protein-tyrosine sulfotransferase 1 OS=Homo sapiens OX=9606 GN=TPST1 PE=1 SV=1	0	2	0	0	0	0	0	0	0	0	0	0	3.49479	5.95242	10.7229	10.7237	19.7442	10.3237	14.8514
sp|O60508|PRP17_HUMAN	O60508	12.4718	12.8958	14.0978	11.1434	12.4261	10.0424	9.04211	11.318	12.1719	10.7543	7.72138	8.14164	7.19993	9.18228	9.02623	10.9488	10.7129	10.835	10.2111	9.9319	11.5497	9.29908	1.24202	0.00278603	0.0163234	1	sp|O60508|PRP17_HUMAN	CDC40	Pre-mRNA-processing factor 17 OS=Homo sapiens OX=9606 GN=CDC40 PE=1 SV=1	4	5	11.4602	12.2929	13.6994	10.5628	12.0258	7.53465	8.14164	7.02923	8.61054	8.64286	9.31901	8.19051	10.5695	11.0866	9.55413	10.9101	10.4478
sp|O60513|B4GT4_HUMAN	O60513						12.6369	12.3013	10.7417	11.7304	19.7781						6.68038	7.25942	8.01249	8.87741	9.13143	13.1109	7.93705	1.65186	0.00348245	0.0189172		sp|O60513|B4GT4_HUMAN	B4GALT4	Beta-1,4-galactosyltransferase 4 OS=Homo sapiens OX=9606 GN=B4GALT4 PE=1 SV=1	0	3	0	0	0	0	0	0	0	0	0	0	11.7266	11.1427	10.0313	10.6845	17.5709	6.65676	7.07979
sp|O60518|RNBP6_HUMAN	O60518	8.23968	9.326	8.91392	9.6778	9.28603	10.0528	12.1668	12.1779	12.276	11.5266	12.2644	11.9081	12.1334	11.689	10.4785	9.0943	10.2913	9.07553	10.2655	9.42258	10.2638	10.5955	1.03232	0.602641	0.715548		sp|O60518|RNBP6_HUMAN	RANBP6	Ran-binding protein 6 OS=Homo sapiens OX=9606 GN=RANBP6 PE=1 SV=2	7	5	7.57135	8.88999	8.66204	9.17357	8.98686	11.9678	11.9081	11.8457	10.9612	10.0334	9.32858	11.0209	11.3725	11.1814	10.2402	9.06215	10.0366
sp|O60522|TDRD6_HUMAN	O60522	6.94681	5.87764	6.69128	7.26792	5.35003	21.4704	20.3797	5.16402	6.43712	7.04203	15.4072	24.7733	20.3432	5.33484	4.985	10.8743	9.74468	9.33104	7.10505	8.74165	8.01065	10.2404	1.27835	0.31258	0.451676		sp|O60522|TDRD6_HUMAN	TDRD6	Tudor domain-containing protein 6 OS=Homo sapiens OX=9606 GN=TDRD6 PE=2 SV=2	1	1	6.38334	5.60285	6.50221	6.88925	5.17767	15.0346	24.7733	19.8609	5.00266	4.77327	19.9237	18.4603	4.8225	5.86316	6.25615	10.8359	9.50355
sp|O60524|NEMF_HUMAN	O60524	9.24139	11.1079	10.084	10.3324	11.1464	9.74199	11.4085	10.8797	11.3258	10.4025	10.5393	11.6657	10.1924	10.201	9.47496	9.50771	9.51403	10.6594	11.6874	10.9696	10.5439	10.4119	1.01268	0.710517	0.797445		sp|O60524|NEMF_HUMAN	NEMF	Nuclear export mediator factor NEMF OS=Homo sapiens OX=9606 GN=NEMF PE=1 SV=4	6	7	8.49181	10.5886	9.79902	9.79407	10.7873	10.2844	11.6657	9.95074	9.56578	9.07253	9.0402	10.334	10.1602	10.3159	9.24156	9.4741	9.27861
sp|O60547|GMDS_HUMAN	O60547	7.19117	7.06183	7.43681	8.16778	8.41658	8.53281	14.1429	10.7807	12.404	11.6273	16.5337	10.6245	13.9136	10.9615	13.4982	7.8224	18.3891	7.67371	7.5323	7.41771	9.30606	10.8352	1.16432	0.27071	0.407431		sp|O60547|GMDS_HUMAN	GMDS	GDP-mannose 4,6 dehydratase OS=Homo sapiens OX=9606 GN=GMDS PE=1 SV=1	17	15	6.60788	6.73168	7.22667	7.74223	8.14542	16.1339	10.6245	13.5837	10.279	12.9249	7.91813	12.8109	10.0677	11.298	10.3297	7.79474	17.9341
sp|O60551|NMT2_HUMAN	O60551	9.4697	10.0421	9.15072	10.1691	9.63431	8.30158	10.6997	10.5796	9.67658	10.2697	11.1171	11.3362	11.0661	10.5089	11.517	9.01137	13.0368	10.2607	12.2321	11.814	9.77462	11.1388	1.13956	0.00436143	0.0220977		sp|O60551|NMT2_HUMAN	NMT2	Glycylpeptide N-tetradecanoyltransferase 2 OS=Homo sapiens OX=9606 GN=NMT2 PE=1 SV=1	11	13	8.7016	9.57261	8.89215	9.63925	9.32392	10.8483	11.3362	10.8037	9.85452	11.0278	7.70355	9.69201	9.87992	8.81377	9.12364	8.97951	12.7142
sp|O60563|CCNT1_HUMAN	O60563	17.4206	12.4378	12.7522	12.0507	11.7944						7.08273	7.15398	7.19922	8.57599	8.11582						13.1467	7.60204	1.72936	0.000159498	0.0025684		sp|O60563|CCNT1_HUMAN	CCNT1	Cyclin-T1 OS=Homo sapiens OX=9606 GN=CCNT1 PE=1 SV=1	2	0	16.0076	11.8563	12.3919	11.4228	11.4144	6.91145	7.15398	7.02854	8.042	7.77112	0	0	0	0	0	0	0
sp|O60565|GREM1_HUMAN	O60565						3.90518	5.01897	10.9626	11.2348	29.4413						17.4391	8.76258	5.7836	7.29126	6.91766	9.33982	8.50791	1.09778	0.806875	0.870024		sp|O60565|GREM1_HUMAN	GREM1	Gremlin-1 OS=Homo sapiens OX=9606 GN=GREM1 PE=1 SV=1	0	1	0	0	0	0	0	0	0	0	0	0	3.62386	4.54627	10.2376	10.2331	26.1557	17.3774	8.54575
sp|O60568|PLOD3_HUMAN	O60568	10.4897	12.2727	10.1635	11.7776	10.3723	10.6261	10.6818	9.01342	8.66074	12.1119	9.90537	7.90697	8.96766	11.6865	10.7538	14.5999	13.0698	9.49146	8.91433	8.61705	10.5544	10.2075	1.03399	0.652836	0.75568		sp|O60568|PLOD3_HUMAN	PLOD3	Multifunctional procollagen lysine hydroxylase and glycosyltransferase LH3 OS=Homo sapiens OX=9606 GN=PLOD3 PE=1 SV=1	16	11	9.63887	11.6989	9.87634	11.164	10.0381	9.66583	7.90697	8.75505	10.9588	10.2971	9.86063	9.67575	8.41733	7.88851	10.7602	14.5483	12.7464
sp|O60573|IF4E2_HUMAN	O60573	9.94508	9.75741	10.0546	9.73499	9.19451	9.18259	10.5382	12.13	11.4956	11.2704	12.0276	11.1023	11.9787	10.3722	9.82094	7.72424	10.221	11.0618	10.9158	11.642	10.2878	10.6103	1.03135	0.549042	0.66893		sp|O60573|IF4E2_HUMAN	EIF4E2	Eukaryotic translation initiation factor 4E type 2 OS=Homo sapiens OX=9606 GN=EIF4E2 PE=1 SV=1	8	7	9.13842	9.30124	9.77048	9.22778	8.89829	11.7367	11.1023	11.6947	9.72632	9.40382	8.5211	9.54566	11.3278	10.4706	10.0126	7.69693	9.96806
sp|O60602|TLR5_HUMAN	O60602	11.7213	16.1953	10.0707	14.2017	7.37735						6.6167	9.40883	7.5492	9.41999	11.8374						11.4903	8.78773	1.30754	0.152613	0.270856		sp|O60602|TLR5_HUMAN	TLR5	Toll-like receptor 5 OS=Homo sapiens OX=9606 GN=TLR5 PE=1 SV=4	1	0	10.7706	15.4381	9.78609	13.4618	7.13967	6.45669	9.40883	7.37022	8.83345	11.3346	0	0	0	0	0	0	0
sp|O60610|DIAP1_HUMAN	O60610	8.69234	9.24416	9.29009	8.61891	9.99777	9.47393	12.7579	10.6954	10.8253	10.7963	13.5807	11.6859	11.9254	10.8823	9.96544	9.70515	10.3094	9.44599	11.2047	10.9546	9.97149	10.9063	1.09374	0.0999731	0.200394		sp|O60610|DIAP1_HUMAN	DIAPH1	Protein diaphanous homolog 1 OS=Homo sapiens OX=9606 GN=DIAPH1 PE=1 SV=2	16	11	7.98729	8.81198	9.02759	8.16985	9.67567	13.2523	11.6859	11.6427	10.2047	9.54218	8.79145	11.5563	9.98807	9.86011	9.59143	9.67084	10.0543
sp|O60613|SEP15_HUMAN	O60613	11.4831	10.8761	12.2514	10.8801	11.2716	14.6962	10.8084	11.2448	11.2286	10.2835	10.1723	10.0171	9.35804	9.00679	8.8021	11.5222	9.32841	8.90458	9.56253	8.5988	11.4491	9.49396	1.20594	0.000287436	0.00355439	2	sp|O60613|SEP15_HUMAN	SELENOF	Selenoprotein F OS=Homo sapiens OX=9606 GN=SELENOF PE=1 SV=4	6	5	10.5517	10.3676	11.9052	10.3132	10.9085	9.92632	10.0171	9.13618	8.44597	8.42825	13.6375	9.79043	10.5011	10.2274	9.13587	11.4815	9.09758
sp|O60635|TSN1_HUMAN	O60635	20.0831	6.02057	4.2597	8.18665	44.1216							2.58067	4.7563	4.1378	10.551						11.3219	4.81135	2.35317	0.165861	0.287984		sp|O60635|TSN1_HUMAN	TSPAN1	Tetraspanin-1 OS=Homo sapiens OX=9606 GN=TSPAN1 PE=1 SV=2	1	0	18.4541	5.7391	4.13934	7.76011	42.7001	0	2.58067	4.64354	3.88016	10.1029	0	0	0	0	0	0	0
sp|O60637|TSN3_HUMAN	O60637	11.6466	11.8347	9.42646	9.94852	5.20262	8.6921	8.00973	14.5173	16.7888	7.10263	8.64981	15.9425	13.5641	11.6598	6.09061	7.39464	7.42194	15.9387	9.16228	10.9543	9.79208	10.155	1.03706	0.814716	0.875253		sp|O60637|TSN3_HUMAN	TSPAN3	Tetraspanin-3 OS=Homo sapiens OX=9606 GN=TSPAN3 PE=2 SV=1	6	6	10.7019	11.2814	9.1601	9.43019	5.03501	8.44063	15.9425	13.2425	10.9338	5.83192	8.06594	7.25536	13.5572	15.2918	6.30998	7.3685	7.23829
sp|O60641|AP180_HUMAN	O60641	8.93672	10.3564	9.74076	10.1455	13.6251	10.2866	12.6716	11.8611	11.4534	14.3396	10.5622	9.6667	9.53681	10.1862	11.2908	7.22754	9.82658	7.70406	10.8689	10.4199	11.2209	9.64125	1.16385	0.0356169	0.0946423		sp|O60641|AP180_HUMAN	SNAP91	Clathrin coat assembly protein AP180 OS=Homo sapiens OX=9606 GN=SNAP91 PE=1 SV=2	5	4	8.21185	9.87223	9.46552	9.61691	13.1861	10.3068	9.6667	9.31071	9.55197	10.8112	9.54554	11.4782	11.0767	10.4322	12.7393	7.20199	9.58342
sp|O60645|EXOC3_HUMAN	O60645	9.66622	9.63313	10.1789	10.1443	10.2501	9.51464	11.5105	11.1378	11.6506	10.5417	10.362	10.7644	10.2694	11.2835	11.5146	8.1299	9.48689	11.1835	11.6843	11.3304	10.3973	10.5446	1.01416	0.739465	0.820673		sp|O60645|EXOC3_HUMAN	EXOC3	Exocyst complex component 3 OS=Homo sapiens OX=9606 GN=EXOC3 PE=1 SV=3	15	14	8.88218	9.18277	9.89124	9.6158	9.9199	10.1114	10.7644	10.0259	10.5809	11.0255	8.82923	10.4264	10.4012	10.6118	9.36522	8.10116	9.25214
sp|O60662|KLH41_HUMAN	O60662	23.824	13.7433	12.553	13.8357	13.4942	23.1021	9.33499	10.2272	8.54691	8.87124	5.17298	8.18165	4.64531	4.76242	4.5997	8.86976	11.3137	6.2245	12.3696	7.3856	12.9072	6.90322	1.86974	0.00132594	0.00993472	1	sp|O60662|KLH41_HUMAN	KLHL41	Kelch-like protein 41 OS=Homo sapiens OX=9606 GN=KLHL41 PE=1 SV=2	12	4	21.8916	13.1008	12.1983	13.1148	13.0595	5.04788	8.18165	4.53518	4.46588	4.40434	21.4379	8.4558	9.55087	7.78483	7.88122	8.8384	11.0337
sp|O60664|PLIN3_HUMAN	O60664	8.36695	8.46872	8.45124	9.30057	9.34942	8.71924	12.0469	8.98653	9.06268	10.7131	13.5562	10.685	12.1337	12.6187	11.0387	15.4476	13.3865	9.26433	9.16784	8.89029	9.28692	11.435	1.2313	0.00826153	0.0341647	4	sp|O60664|PLIN3_HUMAN	PLIN3	Perilipin-3 OS=Homo sapiens OX=9606 GN=PLIN3 PE=1 SV=3	34	33	7.68829	8.07279	8.21244	8.816	9.04821	13.2284	10.685	11.846	11.833	10.5699	8.09113	10.9123	8.39222	8.25461	9.51754	15.393	13.0553
sp|O60669|MOT2_HUMAN	O60669	6.18281	8.08258	4.71669	7.30241	9.57506	6.59701	13.4773	7.06508	7.77681	19.9413	18.031	11.6745	18.9838	9.43196	9.60194	7.84509	21.0698	7.43247	8.16628	7.0957	8.32838	10.9926	1.3199	0.154212	0.272866		sp|O60669|MOT2_HUMAN	SLC16A7	Monocarboxylate transporter 2 OS=Homo sapiens OX=9606 GN=SLC16A7 PE=1 SV=2	1	2	5.68131	7.70471	4.58341	6.92194	9.26658	17.595	11.6745	18.5337	8.84467	9.19412	6.12178	12.208	6.59784	7.0834	17.7159	7.81735	20.5484
sp|O60678|ANM3_HUMAN	O60678	8.96021	9.99986	8.8038	9.11753	10.7212	7.99113	10.8118	9.97824	10.5212	10.0444	9.89933	10.5144	11.1529	12.377	12.5236	9.05621	12.7986	10.1084	13.4757	11.1118	9.65306	11.2182	1.16214	0.00901063	0.0361614		sp|O60678|ANM3_HUMAN	PRMT3	Protein arginine N-methyltransferase 3 OS=Homo sapiens OX=9606 GN=PRMT3 PE=1 SV=4	2	1	8.23343	9.53235	8.55504	8.64249	10.3758	9.65993	10.5144	10.8885	11.6063	11.9917	7.41547	9.79353	9.31834	9.58304	8.92344	9.02419	12.4819
sp|O60683|PEX10_HUMAN	O60683						3.54248	2.90073	3.55395	2.34605	3.05227						23.833	20.7493	21.4638	10.1853	11.5955	3.04437	16.5817	5.44669	2.46512e-05	0.000842396		sp|O60683|PEX10_HUMAN	PEX10	Peroxisome biogenesis factor 10 OS=Homo sapiens OX=9606 GN=PEX10 PE=1 SV=1	0	1	0	0	0	0	0	0	0	0	0	0	3.28729	2.62753	3.31891	2.13687	2.71164	23.7487	20.2359
sp|O60684|IMA7_HUMAN	O60684	10.7055	10.0332	10.86	10.4721	10.0712	7.36284	7.17566	10.2536	10.6219	10.402	8.90793	11.7208	9.11404	10.7532	11.4642	11.6378	12.8401	12.072	11.3156	11.8772	9.69862	11.1018	1.14468	0.0410881	0.10483		sp|O60684|IMA7_HUMAN	KPNA6	Importin subunit alpha-7 OS=Homo sapiens OX=9606 GN=KPNA6 PE=1 SV=1	9	12	9.8372	9.5641	10.5531	9.92651	9.74677	8.69251	11.7208	8.89796	10.0836	10.9773	6.83244	6.49984	9.57552	9.67485	9.24115	11.5967	12.5224
sp|O60687|SRPX2_HUMAN	O60687	9.87938	9.54441	9.84091	9.78287	8.5742						12.726	10.27	11.7395	12.3218	9.38442						9.51119	11.215	1.17914	0.031787	0.0872077		sp|O60687|SRPX2_HUMAN	SRPX2	Sushi repeat-containing protein SRPX2 OS=Homo sapiens OX=9606 GN=SRPX2 PE=1 SV=1	2	0	9.07805	9.09819	9.56284	9.27317	8.29796	12.4182	10.27	11.4612	11.5546	8.98584	0	0	0	0	0	0	0
sp|O60701|UGDH_HUMAN	O60701	7.3586	7.56573	7.34923	8.8429	7.66304	6.47261	13.2418	11.3174	11.9926	12.3737	16.1696	11.9235	15.2141	12.9038	8.80447	8.64877	13.4874	8.85384	9.73795	10.1601	9.12236	11.3036	1.2391	0.0719265	0.157546		sp|O60701|UGDH_HUMAN	UGDH	UDP-glucose 6-dehydrogenase OS=Homo sapiens OX=9606 GN=UGDH PE=1 SV=1	30	39	6.76173	7.21202	7.14157	8.38217	7.41616	15.7786	11.9235	14.8534	12.1003	8.43052	6.00634	11.9947	10.5689	10.9233	10.9928	8.61819	13.1537
sp|O60706|ABCC9_HUMAN	O60706	8.25496	10.5454	6.87805	9.72415	7.09555	18.5541	24.324	10.7945	13.2673	9.54102	12.8686	12.2123	14.3568	9.78801	12.1451		6.96035	8.18739	11.1099	4.85851	10.9803	9.78856	1.12175	0.517715	0.642602		sp|O60706|ABCC9_HUMAN	ABCC9	ATP-binding cassette sub-family C member 9 OS=Homo sapiens OX=9606 GN=ABCC9 PE=1 SV=2	3	1	7.58539	10.0524	6.6837	9.21751	6.86695	12.5574	12.2123	14.0164	9.17855	11.6293	17.2175	22.0331	10.0806	12.0843	8.47625	0	6.78812
sp|O60716|CTND1_HUMAN	O60716	10.4566	10.887	10.7867	10.8117	10.3159	13.0129	11.269	10.7307	10.643	9.89461	10.1728	10.825	10.5927	10.1174	9.10574	10.4253	9.66143	10.4157	9.9951	10.033	10.8541	10.1235	1.07217	0.0219315	0.0671452		sp|O60716|CTND1_HUMAN	CTNND1	Catenin delta-1 OS=Homo sapiens OX=9606 GN=CTNND1 PE=1 SV=1	29	27	9.60844	10.378	10.4819	10.2484	9.98354	9.92677	10.825	10.3416	9.48741	8.71899	12.0755	10.2077	10.021	9.69402	8.79038	10.3884	9.42236
sp|O60725|ICMT_HUMAN	O60725	11.2911	8.34917	7.98482	9.30093	8.49494	8.2663	4.88611	10.6731	11.0506	17.4714	10.7152	9.05469	13.1227	13.1902	12.718	14.9648	10.9521	8.90214	9.0432	9.77469	9.32097	11.0664	1.18726	0.168245	0.290467		sp|O60725|ICMT_HUMAN	ICMT	Protein-S-isoprenylcysteine O-methyltransferase OS=Homo sapiens OX=9606 GN=ICMT PE=1 SV=1	2	1	10.3753	7.95883	7.7592	8.81634	8.22126	10.4561	9.05469	12.8116	12.3689	12.1778	7.67081	4.42593	9.96721	10.0653	15.5216	14.9119	10.6811
sp|O60749|SNX2_HUMAN	O60749	8.78262	8.88032	8.63591	8.88763	10.0286	7.7998	12.7163	11.2368	11.1992	12.396	12.5419	11.4053	12.2579	12.3564	10.1767	9.12619	11.3496	9.88562	10.0527	10.491	9.92645	10.9063	1.09871	0.15773	0.277863		sp|O60749|SNX2_HUMAN	SNX2	Sorting nexin-2 OS=Homo sapiens OX=9606 GN=SNX2 PE=1 SV=2	18	29	8.07025	8.46515	8.39189	8.42457	9.70546	12.2386	11.4053	11.9673	11.587	9.74448	7.23792	11.5187	10.4937	10.2006	11.0126	9.09392	11.0688
sp|O60762|DPM1_HUMAN	O60762	11.8209	10.3056	12.2012	11.0459	10.7129	15.8919	11.0239	11.8445	12.869	10.7424	10.1249	9.78028	10.185	8.33608	9.60666	7.34727	8.49069	9.94074	8.86373	9.49729	11.7569	9.17264	1.28173	0.00015257	0.00248991	2	sp|O60762|DPM1_HUMAN	DPM1	Dolichol-phosphate mannosyltransferase subunit 1 OS=Homo sapiens OX=9606 GN=DPM1 PE=1 SV=1	17	15	10.8621	9.82378	11.8564	10.4704	10.3678	9.88008	9.78028	9.94351	7.81703	9.19864	14.7471	9.98565	11.0612	11.7215	9.5436	7.32129	8.28059
sp|O60763|USO1_HUMAN	O60763	9.57559	10.0529	9.60751	9.88262	8.69468	8.70904	11.3575	12.1098	12.4308	10.1127	11.4476	12.913	11.5013	11.8754	8.40866	7.86048	10.0284	10.5611	11.5718	11.4434	10.1811	10.6469	1.04575	0.487805	0.615653		sp|O60763|USO1_HUMAN	USO1	General vesicular transport factor p115 OS=Homo sapiens OX=9606 GN=USO1 PE=1 SV=2	57	65	8.7989	9.58294	9.33604	9.36772	8.41456	11.1708	12.913	11.2286	11.136	8.05152	8.08166	10.2878	11.3089	11.3224	8.9841	7.83269	9.78024
sp|O60783|RT14_HUMAN	O60783	11.9446	11.604	12.7096	11.4867	11.0831	6.83028	8.73189	8.49665	8.39812	5.04735	9.18801	8.13479	8.87115	9.12356	10.1105	22.8442	11.1028	10.4348	10.1495	12.6694	9.29567	10.7606	1.1576	0.281153	0.417856		sp|O60783|RT14_HUMAN	MRPS14	28S ribosomal protein S14, mitochondrial OS=Homo sapiens OX=9606 GN=MRPS14 PE=1 SV=1	2	1	10.9758	11.0615	12.3505	10.8882	10.726	8.96582	8.13479	8.66083	8.55547	9.68109	6.33824	7.9095	7.93473	7.64931	4.48407	22.7634	10.8281
sp|O60784|TOM1_HUMAN	O60784	10.5506	9.8442	10.1318	10.3396	9.54415	9.336	10.3235	10.1412	10.6521	9.70378	10.5316	10.177	10.3147	11.8793	10.8346	12.7439	11.5123	11.0117	9.74867	10.5705	10.0481	10.9007	1.08485	0.011113	0.0415466		sp|O60784|TOM1_HUMAN	TOM1	Target of Myb protein 1 OS=Homo sapiens OX=9606 GN=TOM1 PE=1 SV=2	27	21	9.69484	9.38397	9.84556	9.80091	9.23666	10.2769	10.177	10.0702	11.1396	10.3744	8.66346	9.35122	9.47051	9.70233	8.62085	12.6988	11.2274
sp|O60825|F262_HUMAN	O60825	8.08087	9.29272	8.34957	9.13109	7.32236	7.42082	9.32566	13.1542	13.1376	8.18368	10.0622	16.0417	11.6897	12.1774	11.6639	8.86173	7.98115	12.2986	12.6537	12.8921	9.14766	11.4291	1.2494	0.0257629	0.0750923	4	sp|O60825|F262_HUMAN	PFKFB2	6-phosphofructo-2-kinase/fructose-2,6-bisphosphatase 2 OS=Homo sapiens OX=9606 GN=PFKFB2 PE=1 SV=2	24	26	7.42542	8.85827	8.11364	8.65535	7.08645	9.81884	16.0417	11.4126	11.4192	11.1685	6.88624	8.44735	12.2843	11.9662	7.27039	8.8304	7.78366
sp|O60826|CCD22_HUMAN	O60826	10.1511	10.9322	10.2832	9.46466	10.0112	8.0085	10.0018	10.6715	9.91548	11.3438	10.1038	11.2284	10.0526	11.5881	10.2658	12.0254	11.963	10.2614	10.8048	10.827	10.0389	10.8887	1.08465	0.0417654	0.106103		sp|O60826|CCD22_HUMAN	CCDC22	Coiled-coil domain-containing protein 22 OS=Homo sapiens OX=9606 GN=CCDC22 PE=1 SV=1	18	17	9.3277	10.4211	9.99261	8.97154	9.68867	9.85948	11.2284	9.81426	10.8666	9.82975	7.43159	9.05983	9.96574	9.03137	10.0778	11.9829	11.667
sp|O60828|PQBP1_HUMAN	O60828	10.888	12.0994	13.3059	10.2137	11.5598	11.2822	8.30727	11.4408	9.18697	8.60869	8.72165	10.3992	8.53271	9.75315	8.6434	11.6725	10.2124	13.6278	10.0765	11.161	10.5787	10.1771	1.03946	0.572299	0.688988		sp|O60828|PQBP1_HUMAN	PQBP1	Polyglutamine-binding protein 1 OS=Homo sapiens OX=9606 GN=PQBP1 PE=1 SV=1	2	2	10.0049	11.5337	12.9299	9.68155	11.1874	8.51073	10.3992	8.33041	9.14586	8.27629	10.4695	7.52488	10.6842	8.36782	7.64797	11.6312	9.95967
sp|O60830|TI17B_HUMAN	O60830	13.2905	12.6289	12.3921	12.2776	11.2047	15.1055	9.00658	12.9797	14.2267	9.82225	7.74818	8.75572	8.42206	9.15606	8.45995	3.85119	5.7657	8.80007	13.6642	13.4118	12.1586	8.31761	1.46179	0.00750698	0.0320374	2	sp|O60830|TI17B_HUMAN	TIMM17B	Mitochondrial import inner membrane translocase subunit Tim17-B OS=Homo sapiens OX=9606 GN=TIMM17B PE=1 SV=1	2	1	12.2125	12.0385	12.0419	11.6379	10.8437	7.56081	8.75572	8.22239	8.58595	8.10063	14.0173	8.15832	12.1213	12.9582	8.7261	3.83757	5.62303
sp|O60831|PRAF2_HUMAN	O60831	11.4622	11.5144	11.566	11.4521	10.7848	12.5467	14.7037	8.48769	8.76212	9.77735	9.40429	8.85099	9.68613	9.97911	9.52177	11.9702	10.1891	9.94859	9.65583	9.99394	10.9723	9.89191	1.10922	0.0874347	0.182401		sp|O60831|PRAF2_HUMAN	PRAF2	PRA1 family protein 2 OS=Homo sapiens OX=9606 GN=PRAF2 PE=1 SV=1	6	6	10.5325	10.9761	11.2392	10.8554	10.4373	9.17687	8.85099	9.45649	9.35775	9.11735	11.6429	13.3189	7.92637	7.98085	8.68621	11.9279	9.93695
sp|O60832|DKC1_HUMAN	O60832	12.3773	11.6918	12.5507	9.76225	13.4186	16.6853	9.87494	9.27474	9.49311	10.62	9.34178	8.56061	9.7142	8.36461	8.39794	10.5166	10.7441	10.1611	9.6486	9.04357	11.3871	9.41401	1.20959	0.00977871	0.0382154	1	sp|O60832|DKC1_HUMAN	DKC1	H/ACA ribonucleoprotein complex subunit DKC1 OS=Homo sapiens OX=9606 GN=DKC1 PE=1 SV=3	12	7	11.3734	11.1452	12.1961	9.25362	12.9863	9.11587	8.56061	9.48389	7.84378	8.04125	15.4833	8.9449	8.66137	8.64666	9.43483	10.4794	10.4782
sp|O60841|IF2P_HUMAN	O60841	9.25313	9.83819	9.85628	10.1357	9.93097	8.05485	10.5465	10.2213	9.50456	10.8963	11.8148	11.1113	10.9328	10.8451	10.2753	10.0474	11.9655	11.0561	11.8218	11.7365	9.7941	11.1423	1.13766	0.000906394	0.00752525		sp|O60841|IF2P_HUMAN	EIF5B	Eukaryotic translation initiation factor 5B OS=Homo sapiens OX=9606 GN=EIF5B PE=1 SV=4	28	25	8.50259	9.37824	9.57778	9.60764	9.61102	11.5291	11.1113	10.6736	10.1698	9.83885	7.4746	9.55317	9.5453	8.65709	9.68032	10.0119	11.6694
sp|O60858|TRI13_HUMAN	O60858	10.3604	10.8063	12.5008	11.8927	10.4061						8.71252	10.037	10.0914	9.01218	10.282						11.1612	9.60553	1.16196	0.017791	0.0581187		sp|O60858|TRI13_HUMAN	TRIM13	E3 ubiquitin-protein ligase TRIM13 OS=Homo sapiens OX=9606 GN=TRIM13 PE=1 SV=2	3	0	9.52006	10.3011	12.1476	11.2731	10.0708	8.50183	10.037	9.85213	8.45103	9.84533	0	0	0	0	0	0	0
sp|O60861|GAS7_HUMAN	O60861	8.00469	8.99216	10.044	10.4484	7.52053	6.60671	6.88743	11.8502	10.7352	9.8726	9.32833	9.32113	9.6122	9.5138	21.3057	16.3979	11.2976	12.0875	9.14744	10.4764	8.93598	11.3777	1.27325	0.0419123	0.106389	3	sp|O60861|GAS7_HUMAN	GAS7	Growth arrest-specific protein 7 OS=Homo sapiens OX=9606 GN=GAS7 PE=1 SV=3	5	4	7.35542	8.57176	9.76017	9.90401	7.27824	9.10274	9.32113	9.38431	8.92141	20.4008	6.13078	6.23876	11.0665	9.778	8.77083	16.3399	11.018
sp|O60869|EDF1_HUMAN	O60869	8.47942	7.78025	7.56103	9.11719	25.5446	3.54594	4.07315	4.36702	4.33001	4.21485	8.6631	12.36	11.4573	8.6056	4.18959	23.335	22.0461	12.8531	13.8978	11.0492	6.49564	11.6208	1.78901	0.0296239	0.0827358	3	sp|O60869|EDF1_HUMAN	EDF1	Endothelial differentiation-related factor 1 OS=Homo sapiens OX=9606 GN=EDF1 PE=1 SV=1	2	4	7.79164	7.41651	7.34738	8.64217	24.7216	8.4536	12.36	11.1857	8.06976	4.01165	3.2905	3.68953	4.07821	3.94393	3.74448	23.2525	21.5006
sp|O60879|DIAP2_HUMAN	O60879	9.79821	9.79673	10.2737	8.99671	9.30301	4.92139	6.68751	7.80151	7.80414	6.97551	9.61388	13.7783	11.8556	11.6748	8.83637	7.19782	11.9768	17.4065	16.6267	17.6768	8.05767	12.1731	1.51074	0.00278596	0.0163234	3	sp|O60879|DIAP2_HUMAN	DIAPH2	Protein diaphanous homolog 2 OS=Homo sapiens OX=9606 GN=DIAPH2 PE=1 SV=1	7	19	9.00346	9.33872	9.98337	8.52797	9.00329	9.38139	13.7783	11.5745	10.9479	8.46106	4.56686	6.05767	7.28557	7.10829	6.19705	7.17237	11.6804
sp|O60884|DNJA2_HUMAN	O60884	9.19181	8.9462	9.65275	8.94233	8.3531	10.2455	12.049	12.4587	12.6678	10.0749	12.2687	13.4692	12.25	10.9387	9.8451	7.94407	8.79314	10.5231	10.8285	10.7222	10.1529	10.6406	1.04803	0.504246	0.630618		sp|O60884|DNJA2_HUMAN	DNAJA2	DnaJ homolog subfamily A member 2 OS=Homo sapiens OX=9606 GN=DNAJA2 PE=1 SV=1	19	17	8.44625	8.52795	9.38	8.47642	8.08399	11.972	13.4692	11.9596	10.2576	9.42695	9.50741	10.9142	11.6348	11.5383	8.95059	7.91598	8.57556
sp|O60885|BRD4_HUMAN	O60885	11.8612	12.3331	11.4756	11.1687	13.6439	12.704	10.6678	11.3911	10.4973	10.4524	8.28731	7.19748	7.98627	9.42949	10.9432	7.21754	8.32605	11.2155	12.1005	11.6526	11.5792	9.26711	1.2495	0.0046807	0.0233268	1	sp|O60885|BRD4_HUMAN	BRD4	Bromodomain-containing protein 4 OS=Homo sapiens OX=9606 GN=BRD4 PE=1 SV=2	8	1	10.8991	11.7565	11.1513	10.5868	13.2043	8.0869	7.19748	7.79693	8.84235	10.4784	11.7888	9.66308	10.6378	9.56134	9.28596	7.19202	8.12002
sp|O60888|CUTA_HUMAN	O60888	10.1481	10.703	10.4124	10.6551	10.3095	6.78781	7.65186	10.1225	9.94157	9.16711	9.46648	10.777	9.36134	11.741	10.5616	13.2304	13.987	11.106	11.2941	12.0917	9.49448	11.2763	1.18767	0.0143357	0.0500106		sp|O60888|CUTA_HUMAN	CUTA	Protein CutA OS=Homo sapiens OX=9606 GN=CUTA PE=1 SV=2	21	23	9.32499	10.2026	10.1182	10.1	9.97731	9.23755	10.777	9.1394	11.0099	10.113	6.29883	6.93119	9.45308	9.05514	8.14407	13.1836	13.6409
sp|O60890|OPHN1_HUMAN	O60890	5.48548	8.35507	8.24598	8.05141	10.3127						12.7646	17.9117	12.4957	7.16294	12.6218						7.93104	12.0899	1.52438	0.0460582	0.113394		sp|O60890|OPHN1_HUMAN	OPHN1	Oligophrenin-1 OS=Homo sapiens OX=9606 GN=OPHN1 PE=1 SV=1	1	0	5.04054	7.96446	8.01298	7.63192	9.98047	12.4559	17.9117	12.1994	6.71693	12.0857	0	0	0	0	0	0	0
sp|O60907|TBL1X_HUMAN	O60907	10.5505	12.226	11.2873	11.9956	12.8492	10.1771	9.77913	9.61583	10.1934	9.27345	8.41907	9.25355	9.04982	8.571	9.95797	8.59579	10.5039	14.3545	10.5441	12.7369	10.7338	10.0464	1.06842	0.336931	0.475303		sp|O60907|TBL1X_HUMAN	TBL1X	F-box-like/WD repeat-containing protein TBL1X OS=Homo sapiens OX=9606 GN=TBL1X PE=1 SV=3	5	6	9.69474	11.6544	10.9684	11.3706	12.4352	8.21547	9.25355	8.83526	8.03732	9.53503	9.44398	8.85811	8.9799	9.28447	8.23854	8.5654	10.244
sp|O60911|CATL2_HUMAN	O60911	11.7054	12.4221	9.14219	7.21453	12.0994	3.99102	10.097	10.7519	11.2374	17.3834	9.64963	10.9207	10.18	12.2729	8.54943	11.0486	14.8394	7.28014	10.6432	8.99877	9.98197	10.2554	1.02739	0.863531	0.911852		sp|O60911|CATL2_HUMAN	CTSV	Cathepsin L2 OS=Homo sapiens OX=9606 GN=CTSV PE=1 SV=2	3	2	10.756	11.8413	8.88386	6.83864	11.7096	9.41627	10.9207	9.93864	11.5087	8.18631	3.70352	9.14609	10.0408	10.2354	15.4434	11.0095	14.4722
sp|O60921|HUS1_HUMAN	O60921						8.37938	8.53428	10.6876	11.3758	10.6252						10.4021	10.3323	11.7453	11.1919	12.558	9.84273	11.215	1.13942	0.112377	0.21687		sp|O60921|HUS1_HUMAN	HUS1	Checkpoint protein HUS1 OS=Homo sapiens OX=9606 GN=HUS1 PE=1 SV=1	0	1	0	0	0	0	0	0	0	0	0	0	7.77575	7.73051	9.98079	10.3615	9.43941	10.3653	10.0766
sp|O60925|PFD1_HUMAN	O60925	11.9409	8.6995	12.1957	10.6408	10.5046	3.87882	6.90841	6.90713	7.20233	7.64072	10.7784	10.4665	8.96814	11.048	8.90959	16.6703	15.689	13.983	12.3602	13.4417	8.23963	11.9724	1.45303	0.00932615	0.0369596	3	sp|O60925|PFD1_HUMAN	PFDN1	Prefoldin subunit 1 OS=Homo sapiens OX=9606 GN=PFDN1 PE=1 SV=2	1	4	10.9724	8.29278	11.8511	10.0864	10.1662	10.5177	10.4665	8.75552	10.3601	8.53117	3.5994	6.25776	6.45033	6.56014	6.78802	16.6114	15.3008
sp|O60927|PP1RB_HUMAN	O60927	9.73484	11.2706	11.6977	13.3777	11.8284	5.41439	6.49866	4.65904	2.14042	4.56241	7.38681	9.90469	7.20048	9.85715	11.9368	14.1947	19.8035	18.1982	16.2728	12.3595	7.09912	12.0355	1.69536	0.0248197	0.0729341	3	sp|O60927|PP1RB_HUMAN	PPP1R11	E3 ubiquitin-protein ligase PPP1R11 OS=Homo sapiens OX=9606 GN=PPP1R11 PE=1 SV=1	1	1	8.94523	10.7437	11.3672	12.6807	11.4473	7.20817	9.90469	7.02977	9.24339	11.4298	5.02435	5.8866	4.35092	1.94957	4.05325	14.1445	19.3135
sp|O60928|KCJ13_HUMAN	O60928	12.4231	10.5253	12.9402	8.95297	14.3646						7.8718	11.6775	8.58093	7.70297	9.01141						11.6824	8.86507	1.3178	0.038879	0.100913		sp|O60928|KCJ13_HUMAN	KCNJ13	Inward rectifier potassium channel 13 OS=Homo sapiens OX=9606 GN=KCNJ13 PE=1 SV=1	2	0	11.4154	10.0332	12.5746	8.48651	13.9018	7.68144	11.6775	8.37749	7.22334	8.62867	0	0	0	0	0	0	0
sp|O60931|CTNS_HUMAN	O60931						26.4119	29.2293	13.691	16.0342	7.59506						2.0764	2.17477	3.15004	3.89609	4.0365	16.6696	2.95077	5.64925	0.000297711	0.00360333		sp|O60931|CTNS_HUMAN	CTNS	Cystinosin OS=Homo sapiens OX=9606 GN=CTNS PE=1 SV=2	0	1	0	0	0	0	0	0	0	0	0	0	24.5092	26.4764	12.7856	14.6045	6.74746	2.06906	2.12096
sp|O60934|NBN_HUMAN	O60934						3.00823	5.50256	16.3224	14.945	21.4611						6.30533	9.79809	10.8054	10.0255	8.62533	9.71765	8.95932	1.08464	0.805993	0.869567		sp|O60934|NBN_HUMAN	NBN	Nibrin OS=Homo sapiens OX=9606 GN=NBN PE=1 SV=1	0	1	0	0	0	0	0	0	0	0	0	0	2.79152	4.98432	15.2429	13.6124	19.0661	6.28304	9.55564
sp|O60936|NOL3_HUMAN	O60936	9.44368	11.2081	14.7263	11.2875	12.7999	6.99004	5.91133	7.98575	7.00239	7.0923	10.7879	10.2361	6.27627	7.34707	9.88064	12.3086	16.8591	13.5023	15.3246	11.8982	9.05125	10.99	1.2142	0.173395	0.297131		sp|O60936|NOL3_HUMAN	NOL3	Nucleolar protein 3 OS=Homo sapiens OX=9606 GN=NOL3 PE=1 SV=2	2	2	8.67769	10.6841	14.3102	10.6994	12.3875	10.527	10.2361	6.12747	6.8896	9.46098	6.48649	5.35459	7.45762	6.37803	6.30081	12.2651	16.4419
sp|O60939|SCN2B_HUMAN	O60939						5.11685	6.19475	8.96472	9.30384	11.5383						9.62088	14.2882	13.9455	13.2677	13.1905	7.8863	12.739	1.61534	0.0185188	0.0596508		sp|O60939|SCN2B_HUMAN	SCN2B	Sodium channel subunit beta-2 OS=Homo sapiens OX=9606 GN=SCN2B PE=1 SV=1	0	2	0	0	0	0	0	0	0	0	0	0	4.74824	5.61132	8.37185	8.47427	10.2506	9.58687	13.9346
sp|O60941|DTNB_HUMAN	O60941	12.5122	12.8064	12.9262	11.5322	10.4436	7.49353	7.01515	8.29451	7.67954	10.6133	6.78858	9.31981	7.60846	8.87305	11.4905	15.7954	13.1942	12.2519	11.4495	11.4108	9.88028	10.5054	1.06327	0.587038	0.702395		sp|O60941|DTNB_HUMAN	DTNB	Dystrobrevin beta OS=Homo sapiens OX=9606 GN=DTNB PE=1 SV=1	6	5	11.4973	12.2077	12.561	10.9314	10.1071	6.62441	9.31981	7.42808	8.32056	11.0025	6.95371	6.35445	7.74596	6.9948	9.42883	15.7396	12.8677
sp|O60942|MCE1_HUMAN	O60942	9.11984	10.0925	9.20838	11.066	10.7391	12.2592	8.22474	11.1382	13.3457	13.2218	13.5806	9.98448	10.2864	9.348	10.5723	5.56391	8.87726	7.90464	10.3407	15.6742	10.7156	9.86432	1.0863	0.436542	0.568671		sp|O60942|MCE1_HUMAN	RNGTT	mRNA-capping enzyme OS=Homo sapiens OX=9606 GN=RNGTT PE=1 SV=1	1	1	8.38012	9.6207	8.94818	10.4894	10.3931	13.2522	9.98448	10.0425	8.76594	10.1233	11.3761	7.45012	10.4016	12.1557	11.7463	5.54424	8.65759
sp|O75027|ABCB7_HUMAN	O75027	12.4535	12.5308	12.0263	11.3802	13.0295	12.0413	10.3839	10.9801	11.0849	11.4959	8.02584	8.35371	7.89758	8.63834	9.95472	8.55464	8.92986	9.44399	12.3036	11.0459	11.7149	9.2252	1.26988	0.000169301	0.00267123	1	sp|O75027|ABCB7_HUMAN	ABCB7	ATP-binding cassette sub-family B member 7, mitochondrial OS=Homo sapiens OX=9606 GN=ABCB7 PE=1 SV=2	10	12	11.4434	11.945	11.6865	10.7873	12.6097	7.83175	8.35371	7.71034	8.10047	9.53191	11.1739	9.4059	10.2539	10.0965	10.213	8.5244	8.70889
sp|O75037|KI21B_HUMAN	O75037	13.868	15.4963	17.1832	11.471	19.0577	23.9393	9.18153	9.71818	9.89245	9.96853	5.26657	5.37672	7.41995	5.70661	3.50806	5.13565	11.4592	8.14069	9.71678	9.33763	13.2757	6.70202	1.98084	0.000363106	0.00413386	1	sp|O75037|KI21B_HUMAN	KIF21B	Kinesin-like protein KIF21B OS=Homo sapiens OX=9606 GN=KIF21B PE=1 SV=2	4	5	12.7431	14.7718	16.6977	10.8733	18.4437	5.13921	5.37672	7.24404	5.35128	3.35906	22.2148	8.3168	9.07548	9.0104	8.85605	5.11749	11.1756
sp|O75044|SRGP2_HUMAN	O75044	11.7265	10.082	9.54164	9.52742	10.1503	7.17276	14.676	9.03283	8.6329	11.4698	12.4762	9.32557	11.8128	11.1708	8.33378	15.9064	14.8605	9.01182	7.89786	7.11283	10.0268	10.4352	1.04073	0.704911	0.793611		sp|O75044|SRGP2_HUMAN	SRGAP2	SLIT-ROBO Rho GTPase-activating protein 2 OS=Homo sapiens OX=9606 GN=SRGAP2 PE=1 SV=3	9	5	10.7753	9.61063	9.27203	9.03103	9.82329	12.1745	9.32557	11.5327	10.4752	7.97982	6.65605	13.2938	8.43545	7.86315	10.1898	15.8502	14.4928
sp|O75052|CAPON_HUMAN	O75052	10.3328	9.89375	12.0793	11.2728	9.56162	7.68661	7.18688	9.64755	6.41527	5.29761	10.1798	11.4788	9.46195	8.98916	10.7754	19.8735	15.6816	12.9248	9.23395	10.621	8.67395	11.5516	1.33175	0.0239758	0.0713365	3	sp|O75052|CAPON_HUMAN	NOS1AP	Carboxyl-terminal PDZ ligand of neuronal nitric oxide synthase protein OS=Homo sapiens OX=9606 GN=NOS1AP PE=1 SV=3	4	1	9.49465	9.4312	11.738	10.6855	9.25357	9.93358	11.4788	9.23762	8.42944	10.3177	7.13288	6.51001	9.00952	5.84326	4.7064	19.8032	15.2936
sp|O75054|IGSF3_HUMAN	O75054	11.8526	13.009	11.9641	15.3437	9.49784	12.1034	10.0608	10.8194	11.0146	10.8245	8.18542	6.44261	7.12089	8.5827	12.444	9.72481	9.93465	9.76969	10.6648	11.1987	11.5494	9.23689	1.25036	0.00995271	0.0386373	1	sp|O75054|IGSF3_HUMAN	IGSF3	Immunoglobulin superfamily member 3 OS=Homo sapiens OX=9606 GN=IGSF3 PE=2 SV=3	6	5	10.8912	12.4008	11.626	14.5443	9.19185	7.98747	6.44261	6.95207	8.04829	11.9155	11.2315	9.11326	10.1039	10.0325	9.61649	9.69043	9.68882
sp|O75063|XYLK_HUMAN	O75063	10.0353	8.16953	11.53	9.08377	11.0057	14.3033	10.1873	9.21492	11.2204	10.7519	11.7827	10.1018	12.2344	10.4272	9.61162	8.20696	9.15645	11.4214	11.6529	10.0752	10.435	10.3932	1.00402	0.948242	0.965121		sp|O75063|XYLK_HUMAN	FAM20B	Glycosaminoglycan xylosylkinase OS=Homo sapiens OX=9606 GN=FAM20B PE=1 SV=1	1	1	9.22133	7.78759	11.2042	8.61049	10.6511	11.4978	10.1018	11.9443	9.77795	9.20339	13.2729	9.22788	8.6055	10.2199	9.55204	8.17794	8.92988
sp|O75064|DEN4B_HUMAN	O75064						8.82659	11.715	10.1417	12.5032	10.0608						3.12112	13.0922	12.2175	9.49469	15.0743	10.5696	9.34984	1.13046	0.700962	0.790485		sp|O75064|DEN4B_HUMAN	DENND4B	DENN domain-containing protein 4B OS=Homo sapiens OX=9606 GN=DENND4B PE=1 SV=4	0	1	0	0	0	0	0	0	0	0	0	0	8.19074	10.6117	9.47095	11.3884	8.93803	3.11009	12.7682
sp|O75069|TMCC2_HUMAN	O75069	9.13034	10.7084	9.64734	10.1538	6.78716	8.39443	7.74346	11.928	11.5431	7.03865	9.6395	16.7859	11.5853	11.6686	7.7173	10.0626	9.57161	14.3974	11.7266	13.123	9.14586	11.3673	1.24289	0.0338957	0.0914101	4	sp|O75069|TMCC2_HUMAN	TMCC2	Transmembrane and coiled-coil domains protein 2 OS=Homo sapiens OX=9606 GN=TMCC2 PE=1 SV=3	2	2	8.38976	10.2078	9.37474	9.62481	6.5685	9.40639	16.7859	11.3106	10.942	7.38952	7.78971	7.01417	11.1392	10.5139	6.25314	10.027	9.33476
sp|O75083|WDR1_HUMAN	O75083	8.83268	8.4666	8.41354	9.44133	7.92587	9.24489	11.9624	12.5211	12.5204	12.6377	11.2266	10.5017	9.99516	12.7695	16.5299	7.98352	8.11785	10.5005	10.6331	10.3406	10.0311	10.6409	1.06079	0.516382	0.64168		sp|O75083|WDR1_HUMAN	WDR1	WD repeat-containing protein 1 OS=Homo sapiens OX=9606 GN=WDR1 PE=1 SV=4	80	86	8.11625	8.07077	8.1758	8.94942	7.67052	10.9551	10.5017	9.75819	11.9744	15.8278	8.57891	10.8358	11.693	11.404	11.2273	7.95529	7.91698
sp|O75084|FZD7_HUMAN	O75084	9.52507	14.137	11.0995	13.0804	10.4242						9.75858	6.68469	8.35479	9.55416	11.6707						11.5303	9.05187	1.2738	0.0735821	0.159838		sp|O75084|FZD7_HUMAN	FZD7	Frizzled-7 OS=Homo sapiens OX=9606 GN=FZD7 PE=1 SV=2	1	0	8.75248	13.4761	10.7859	12.3989	10.0884	9.52259	6.68469	8.15671	8.95926	11.175	0	0	0	0	0	0	0
sp|O75093|SLIT1_HUMAN	O75093	12.8608	10.9698	10.8663	10.764	11.8597	10.6008	13.5223	12.963	13.5092	12.6193	9.67616	10.1698	9.40932	10.8583	6.7936	5.78255	9.73816	8.19881	10.926	8.90638	12.0015	8.88576	1.35064	0.000552397	0.00542062	2	sp|O75093|SLIT1_HUMAN	SLIT1	Slit homolog 1 protein OS=Homo sapiens OX=9606 GN=SLIT1 PE=2 SV=4	2	1	11.8176	10.4569	10.5593	10.2032	11.4776	9.44216	10.1698	9.18624	10.1822	6.50506	9.8371	12.2487	12.1057	12.3047	11.211	5.76211	9.49719
sp|O75094|SLIT3_HUMAN	O75094	9.59248	10.8346	9.96801	10.4301	11.471	9.9364	10.5216	8.99821	8.45248	13.1094	9.76026	9.12592	11.2006	9.5261	12.1823	12.5189	12.84	9.91874	10.0404	9.56087	10.2595	10.5888	1.03209	0.58046	0.696631		sp|O75094|SLIT3_HUMAN	SLIT3	Slit homolog 3 protein OS=Homo sapiens OX=9606 GN=SLIT3 PE=2 SV=3	15	7	8.81442	10.3281	9.68635	9.8867	11.1014	9.52423	9.12592	10.9351	8.93295	11.6649	9.2206	9.53068	8.40312	7.69882	11.6464	12.4746	12.5223
sp|O75095|MEGF6_HUMAN	O75095						14.7191	9.14443	11.5977	12.5552	13.2087						9.5123	8.82454	8.28028	9.00916	9.62804	12.0954	9.03751	1.33835	0.0087167	0.0354874		sp|O75095|MEGF6_HUMAN	MEGF6	Multiple epidermal growth factor-like domains protein 6 OS=Homo sapiens OX=9606 GN=MEGF6 PE=1 SV=4	0	1	0	0	0	0	0	0	0	0	0	0	13.6588	8.28319	10.8307	11.4357	11.7346	9.47867	8.60618
sp|O75106|AOC2_HUMAN	O75106	19.1013	9.88671	12.4168	8.51273	21.0484	26.9504	10.8576	8.86626	8.42059	7.60623	6.94663	7.46848	5.83618	5.50819	7.73646	9.57199	11.3345	7.08626	8.56467	7.00028	12.145	7.54108	1.61051	0.00715987	0.0310519	1	sp|O75106|AOC2_HUMAN	AOC2	Retina-specific copper amine oxidase OS=Homo sapiens OX=9606 GN=AOC2 PE=1 SV=2	12	5	17.552	9.42449	12.0659	8.0692	20.3703	6.77864	7.46848	5.69781	5.16522	7.40787	25.009	9.83498	8.2799	7.66977	6.75738	9.53815	11.054
sp|O75110|ATP9A_HUMAN	O75110	10.3944	11.5036	9.51195	10.4896	9.07649	13.8124	13.2755	12.4726	14.5739	11.9612	9.1126	11.1749	11.6172	10.7391	10.4783	5.2073	7.0882	8.47791	9.65331	10.385	11.575	9.16382	1.26312	0.0211634	0.0655592	2	sp|O75110|ATP9A_HUMAN	ATP9A	Probable phospholipid-transporting ATPase IIA OS=Homo sapiens OX=9606 GN=ATP9A PE=1 SV=3	10	9	9.55126	10.9658	9.24318	9.94307	8.78407	8.89223	11.1749	11.3418	10.0704	10.0333	12.8174	12.0252	11.6477	13.2744	10.6263	5.18889	6.9128
sp|O75112|LDB3_HUMAN	O75112	20.1591	11.6009	12.1015	12.0699	13.4251						6.74205	8.67803	6.95206	5.65587	7.18141						13.5608	6.97601	1.94392	0.000669593	0.00612787		sp|O75112|LDB3_HUMAN	LDB3	LIM domain-binding protein 3 OS=Homo sapiens OX=9606 GN=LDB3 PE=1 SV=2	4	0	18.524	11.0585	11.7596	11.441	12.9926	6.57901	8.67803	6.78724	5.3037	6.87639	0	0	0	0	0	0	0
sp|O75113|N4BP1_HUMAN	O75113	9.07391	10.6513	10.6541	9.865	11.6275	10.0803	13.7657	12.3958	13.3372	14.1373	13.2619	9.25409	9.00695	8.94678	11.6689	7.75754	9.22448	7.9243	9.35209	8.81025	11.4374	9.40099	1.21662	0.012822	0.0460176	2	sp|O75113|N4BP1_HUMAN	N4BP1	NEDD4-binding protein 1 OS=Homo sapiens OX=9606 GN=N4BP1 PE=1 SV=4	1	2	8.33791	10.1533	10.3531	9.35102	11.2529	12.9412	9.25409	8.79341	8.3897	11.1733	9.35411	12.4692	11.576	12.148	12.5596	7.73011	8.99622
sp|O75116|ROCK2_HUMAN	O75116	8.2543	8.91727	8.61803	8.58947	9.82756	10.0667	13.9061	10.191	10.144	13.5168	14.6065	10.321	12.678	11.4306	10.6701	9.76513	12.7638	8.64452	8.91496	8.45762	10.0464	10.6594	1.06101	0.478398	0.607991		sp|O75116|ROCK2_HUMAN	ROCK2	Rho-associated protein kinase 2 OS=Homo sapiens OX=9606 GN=ROCK2 PE=1 SV=4	19	15	7.58478	8.50037	8.37452	8.14195	9.51094	14.2533	10.321	12.3774	10.7189	10.2169	9.34153	12.5964	9.51704	9.23951	12.0083	9.73061	12.448
sp|O75128|COBL_HUMAN	O75128	5.66866	5.87233	12.6851	8.15093	9.48245						5.87554	6.3891	25.2168	6.31967	18.0629						7.99361	10.1562	1.27054	0.497965	0.625541		sp|O75128|COBL_HUMAN	COBL	Protein cordon-bleu OS=Homo sapiens OX=9606 GN=COBL PE=1 SV=2	1	0	5.20887	5.59779	12.3267	7.72625	9.17695	5.73345	6.3891	24.619	5.92617	17.2957	0	0	0	0	0	0	0
sp|O75131|CPNE3_HUMAN	O75131	11.0235	10.9387	11.2625	11.5351	11.588	10.1331	10.139	10.6143	10.621	12.1133	9.63896	8.8511	8.84515	9.36261	11.1517	8.10612	11.4758	10.3997	11.3619	11.1852	10.98	9.96824	1.1015	0.0400745	0.103016		sp|O75131|CPNE3_HUMAN	CPNE3	Copine-3 OS=Homo sapiens OX=9606 GN=CPNE3 PE=1 SV=1	35	39	10.1294	10.4273	10.9443	10.9341	11.2147	9.40586	8.8511	8.63545	8.77964	10.6781	9.40314	9.18406	9.91238	9.67395	10.7615	8.07746	11.1918
sp|O75140|DEPD5_HUMAN	O75140	8.87846	8.16381	9.08869	8.22436	8.62716	7.29554	8.50244	9.76334	8.52746	8.02689	10.4923	9.56866	12.4882	9.20478	19.2701	12.9786	12.5791	12.5298	12.1024	12.9762	8.48647	12.173	1.4344	6.62392e-05	0.0015141	3	sp|O75140|DEPD5_HUMAN	DEPDC5	GATOR complex protein DEPDC5 OS=Homo sapiens OX=9606 GN=DEPDC5 PE=1 SV=2	4	10	8.15831	7.78214	8.83188	7.79586	8.34922	10.2386	9.56866	12.1921	8.63164	18.4516	6.76999	7.70166	9.11765	7.76711	7.1311	12.9327	12.2678
sp|O75143|ATG13_HUMAN	O75143	9.56241	10.7767	9.00791	10.1732	9.18325	11.1776	7.47248	6.01309	4.30953	6.98412	8.4577	15.3172	10.6629	10.7824	9.98911	14.4672	12.6977	14.8023	15.3826	11.5495	8.16129	12.1803	1.49245	0.00252504	0.0153256	3	sp|O75143|ATG13_HUMAN	ATG13	Autophagy-related protein 13 OS=Homo sapiens OX=9606 GN=ATG13 PE=1 SV=1	1	2	8.78679	10.2729	8.75338	9.6432	8.88739	8.25317	15.3172	10.4101	10.111	9.56484	10.3724	6.76871	5.61542	3.92527	6.2047	14.4161	12.3835
sp|O75146|HIP1R_HUMAN	O75146	10.76	11.758	10.8543	10.1777	14.4369	13.4095	11.2236	12.8377	12.0344	9.61615	9.67398	9.85922	8.71192	9.91673	7.97232	10.1711	6.86777	10.8517	9.99485	9.23453	11.6261	9.25207	1.25659	0.00104966	0.00833145	1	sp|O75146|HIP1R_HUMAN	HIP1R	Huntingtin-interacting protein 1-related protein OS=Homo sapiens OX=9606 GN=HIP1R PE=1 SV=2	4	4	9.88725	11.2083	10.5476	9.64745	13.9718	9.44003	9.85922	8.50537	9.29926	7.63371	12.4435	10.1665	11.9887	10.9614	8.543	10.1351	6.69783
sp|O75147|OBSL1_HUMAN	O75147	10.6304	10.0097	9.86424	9.24495	8.60901	8.4405	9.49919	10.4769	10.135	8.56838	11.1657	13.126	10.6526	11.2025	9.48594	13.737	11.2207	11.8868	10.2134	11.3372	9.51679	11.341	1.19169	0.000849062	0.00720719		sp|O75147|OBSL1_HUMAN	OBSL1	Obscurin-like protein 1 OS=Homo sapiens OX=9606 GN=OBSL1 PE=1 SV=4	12	16	9.76816	9.54172	9.58551	8.76327	8.33165	10.8957	13.126	10.4	10.505	9.08304	7.83247	8.60454	9.78406	9.23133	7.61216	13.6884	10.943
sp|O75150|BRE1B_HUMAN	O75150	9.07776	7.21125	8.35773	7.24061	7.55336	8.75588	9.20306	9.66072	8.63472	6.68302	7.94412	7.96456	19.6211	6.63497	22.3442	9.27108	7.28643	17.2793	7.15476	21.4551	8.18174	11.2674	1.37714	0.0679681	0.151478		sp|O75150|BRE1B_HUMAN	RNF40	E3 ubiquitin-protein ligase BRE1B OS=Homo sapiens OX=9606 GN=RNF40 PE=1 SV=5	8	5	8.34145	6.87411	8.12157	6.86336	7.31001	7.75201	7.96456	19.1559	6.22184	21.3952	8.12513	8.3363	9.02182	7.86481	5.9372	9.2383	7.10613
sp|O75151|PHF2_HUMAN	O75151	11.2613	13.8716	13.0314	14.0494	14.9556	17.9948	9.92784	9.42356	10.071	10.5028	6.85493	6.85394	6.14633	7.68736	9.63127	8.19673	9.85144	12.1708	9.75546	8.29323	12.2511	8.37617	1.46262	0.000792092	0.00688308	1	sp|O75151|PHF2_HUMAN	PHF2	Lysine-specific demethylase PHF2 OS=Homo sapiens OX=9606 GN=PHF2 PE=1 SV=4	2	2	10.3479	13.2231	12.6632	13.3174	14.4738	6.68916	6.85394	6.00061	7.2087	9.2222	16.6985	8.99282	8.80034	9.17306	9.33071	8.16775	9.60767
sp|O75152|ZC11A_HUMAN	O75152	11.2392	12.0227	12.2118	10.629	11.5356	15.9082	12.3069	10.733	10.9143	7.3305	9.32083	9.88267	9.17863	9.96756	8.1667	8.46088	10.9216	8.8277	10.8852	9.86533	11.3023	9.50657	1.18889	0.0199168	0.0628235		sp|O75152|ZC11A_HUMAN	ZC3H11A	Zinc finger CCCH domain-containing protein 11A OS=Homo sapiens OX=9606 GN=ZC3H11A PE=1 SV=3	4	1	10.3276	11.4606	11.8667	10.0752	11.164	9.09542	9.88267	8.96102	9.34692	7.81984	14.7622	11.1478	10.0232	9.9411	6.51242	8.43097	10.6513
sp|O75153|CLU_HUMAN	O75153	8.1257	12.4423	11.1054	12.6957	11.2545	8.62807	10.723	12.8825	12.2899	10.5017	8.51351	11.5876	9.37567	10.2661	8.64678	8.11868	8.65401	10.9467	11.5529	11.8957	10.9454	9.85923	1.11017	0.143528	0.258289		sp|O75153|CLU_HUMAN	CLUH	Clustered mitochondria protein homolog OS=Homo sapiens OX=9606 GN=CLUH PE=1 SV=2	2	6	7.46661	11.8606	10.7916	12.0342	10.8919	8.30763	11.5876	9.15339	9.62685	8.27953	8.00652	9.71309	12.0305	11.1941	9.32973	8.08998	8.43987
sp|O75155|CAND2_HUMAN	O75155	13.3828	10.8619	10.2544	11.8842	11.0198	10.6258	11.2485	11.5404	10.609	11.461	7.67643	8.50447	8.13101	11.6921	11.0248	7.53533	11.1562	11.5	10.0417	10.4808	11.2592	9.64436	1.16744	0.0189863	0.060643		sp|O75155|CAND2_HUMAN	CAND2	Cullin-associated NEDD8-dissociated protein 2 OS=Homo sapiens OX=9606 GN=CAND2 PE=1 SV=3	7	7	12.2973	10.3541	9.96465	11.265	10.6648	7.49079	8.50447	7.93824	10.9641	10.5565	9.86032	10.1891	10.7772	9.66301	10.182	7.50869	10.8801
sp|O75157|T22D2_HUMAN	O75157						10.6279	18.5748	12.3201	10.7625	17.5342						8.59203	10.532	7.29905	5.18227	5.70784	13.563	7.21395	1.88011	0.00727023	0.0313436		sp|O75157|T22D2_HUMAN	TSC22D2	TSC22 domain family protein 2 OS=Homo sapiens OX=9606 GN=TSC22D2 PE=1 SV=3	0	1	0	0	0	0	0	0	0	0	0	0	9.86233	16.8254	11.5053	9.80286	15.5774	8.56165	10.2714
sp|O75164|KDM4A_HUMAN	O75164	11.3675	8.92234	13.5886	10.6766	8.82567	14.5233	12.6677	11.6322	8.38243	12.2546	9.77266	10.1372	12.3837	9.44209	8.94517	6.95885	8.88692	9.3033	11.0392	10.8223	11.106	9.66633	1.14894	0.0894649	0.185289		sp|O75164|KDM4A_HUMAN	KDM4A	Lysine-specific demethylase 4A OS=Homo sapiens OX=9606 GN=KDM4A PE=1 SV=2	2	1	10.4455	8.50521	13.2046	10.1203	8.54133	9.53633	10.1372	12.0901	8.85417	8.56524	13.4771	11.4746	10.8629	7.63502	10.887	6.93425	8.66701
sp|O75165|DJC13_HUMAN	O75165	9.87647	10.0623	9.3266	9.97846	10.2456	8.39758	10.6791	10.6401	10.3777	11.512	10.7384	9.93587	11.0865	11.2833	11.5679	10.4831	12.5686	10.1248	10.4619	10.7149	10.0775	10.8727	1.07892	0.0416194	0.105823		sp|O75165|DJC13_HUMAN	DNAJC13	DnaJ homolog subfamily C member 13 OS=Homo sapiens OX=9606 GN=DNAJC13 PE=1 SV=5	35	34	9.07537	9.59191	9.06306	9.45857	9.91556	10.4787	9.93587	10.8237	10.5807	11.0766	7.79264	9.67333	9.93646	9.45236	10.2273	10.446	12.2576
sp|O75167|PHAR2_HUMAN	O75167						19.0149	15.9472	16.2076	14.7741	11.0464						2.78986	3.74894	9.10958	7.29954	7.45159	15.1651	5.53231	2.74118	0.0028478	0.0165831		sp|O75167|PHAR2_HUMAN	PHACTR2	Phosphatase and actin regulator 2 OS=Homo sapiens OX=9606 GN=PHACTR2 PE=1 SV=2	0	1	0	0	0	0	0	0	0	0	0	0	17.6451	14.4453	15.1357	13.4568	9.81365	2.78	3.65617
sp|O75170|PP6R2_HUMAN	O75170	10.2733	10.6764	9.65117	11.3577	10.855	9.59172	9.9725	12.8509	12.4387	10.6803	10.117	10.7735	8.94327	10.9046	10.5798	9.79719	10.174	8.61414	11.072	10.9743	10.7861	10.1611	1.06151	0.169669	0.29226		sp|O75170|PP6R2_HUMAN	PPP6R2	Serine/threonine-protein phosphatase 6 regulatory subunit 2 OS=Homo sapiens OX=9606 GN=PPP6R2 PE=1 SV=2	5	6	9.43998	10.1773	9.37846	10.7659	10.5053	9.87233	10.7735	8.73124	10.2256	10.1304	8.90075	9.03327	12.001	11.3296	9.48843	9.76255	9.92226
sp|O75175|CNOT3_HUMAN	O75175	10.0383	10.0227	12.0675	10.8664	10.2025	10.9443	11.791	10.4648	10.7911	11.4394	8.64114	9.77209	9.37641	10.8268	12.3342	8.81384	10.3058	11.6916	9.90198	10.0337	10.8417	10.11	1.07238	0.110373	0.213856		sp|O75175|CNOT3_HUMAN	CNOT3	CCR4-NOT transcription complex subunit 3 OS=Homo sapiens OX=9606 GN=CNOT3 PE=1 SV=1	3	4	9.2241	9.55415	11.7265	10.3002	9.87376	8.43217	9.77209	9.15411	10.1527	11.8103	10.1559	10.6805	9.7727	9.8289	10.1628	8.78268	10.0508
sp|O75179|ANR17_HUMAN	O75179	8.21745	8.87359	9.78971	8.83838	9.46365	9.77252	10.7644	11.8073	12.1066	10.0134	13.123	12.2214	12.4613	10.3554	10.4822	8.69709	10.5334	11.2122	10.7645	10.4229	9.89416	10.9596	1.10769	0.0757812	0.163242		sp|O75179|ANR17_HUMAN	ANKRD17	Ankyrin repeat domain-containing protein 17 OS=Homo sapiens OX=9606 GN=ANKRD17 PE=1 SV=3	12	14	7.55092	8.45874	9.51309	8.37789	9.15876	12.8056	12.2214	12.1659	9.71061	10.037	9.06853	9.75063	11.0264	11.0271	8.8959	8.66634	10.2728
sp|O75182|SIN3B_HUMAN	O75182	8.00292	7.95465	8.23014	9.14671	7.97803						16.1312	10.5733	13.0093	9.6731	13.1471						8.25064	12.3057	1.49148	0.0028429	0.0165672		sp|O75182|SIN3B_HUMAN	SIN3B	Paired amphipathic helix protein Sin3b OS=Homo sapiens OX=9606 GN=SIN3B PE=1 SV=2	1	0	7.35379	7.58276	7.99759	8.67015	7.721	15.7411	10.5733	12.7009	9.0708	12.5887	0	0	0	0	0	0	0
sp|O75190|DNJB6_HUMAN	O75190	9.74595	10.4876	9.35464	9.98522	10.2378	14.1068	13.3026	11.3721	12.4789	11.1259	10.3939	9.52825	9.63421	11.1283	13.6518	8.71895	9.29365	8.91303	9.14184	8.07987	11.1219	9.74617	1.14116	0.0546849	0.128437		sp|O75190|DNJB6_HUMAN	DNAJB6	DnaJ homolog subfamily B member 6 OS=Homo sapiens OX=9606 GN=DNAJB6 PE=1 SV=2	5	3	8.95544	9.99728	9.09031	9.46498	9.908	10.1425	9.52825	9.4058	10.4354	13.072	13.0906	12.0497	10.62	11.3662	9.88423	8.68812	9.06368
sp|O75191|XYLB_HUMAN	O75191	9.09937	9.58777	9.26608	10.853	8.76192	7.83627	9.66675	10.8429	11.9433	9.49773	11.648	13.2117	12.665	10.2825	8.50392	11.7596	9.33738	14.065	9.59572	11.1829	9.67175	11.0941	1.14706	0.0456443	0.112638		sp|O75191|XYLB_HUMAN	XYLB	Xylulose kinase OS=Homo sapiens OX=9606 GN=XYLB PE=1 SV=3	8	9	8.36131	9.13953	9.00425	10.2875	8.47963	11.3663	13.2117	12.3647	9.64226	8.14273	7.27176	8.75632	10.1258	10.8784	8.43779	11.718	9.10633
sp|O75197|LRP5_HUMAN	O75197	8.70475	9.39231	10.3067	10.2674	9.93007						13.5861	11.1688	11.5515	9.75316	9.23229						9.70092	10.9557	1.12934	0.143379	0.258204		sp|O75197|LRP5_HUMAN	LRP5	Low-density lipoprotein receptor-related protein 5 OS=Homo sapiens OX=9606 GN=LRP5 PE=1 SV=2	1	0	7.99869	8.9532	10.0155	9.73249	9.61015	13.2575	11.1688	11.2776	9.14587	8.84017	0	0	0	0	0	0	0
sp|O75208|COQ9_HUMAN	O75208	13.6545	11.5447	13.0755	10.5401	13.4346	15.0273	9.71543	11.9348	12.4781	9.48586	7.22175	10.4915	8.22893	7.58553	8.42115	6.39284	6.8814	10.883	12.4708	11.0854	11.9662	8.75175	1.3673	0.00213987	0.0136602	1	sp|O75208|COQ9_HUMAN	COQ9	Ubiquinone biosynthesis protein COQ9, mitochondrial OS=Homo sapiens OX=9606 GN=COQ9 PE=1 SV=1	5	5	12.547	11.005	12.706	9.99096	13.0018	7.04711	10.4915	8.03384	7.11321	8.06348	13.9448	8.80041	11.1455	11.3655	8.42725	6.37024	6.71112
sp|O75223|GGCT_HUMAN	O75223	8.01137	8.97256	6.19993	8.83071	6.96103	6.77292	14.3317	12.3841	12.7637	13.231	13.4281	13.8994	13.8677	12.4273	11.2353	8.77712	9.29864	8.60735	10.6989	9.69522	9.43014	11.0167	1.16824	0.195502	0.324344		sp|O75223|GGCT_HUMAN	GGCT	Gamma-glutamylcyclotransferase OS=Homo sapiens OX=9606 GN=GGCT PE=1 SV=1	12	10	7.36156	8.55308	6.02474	8.37062	6.73676	13.1034	13.8994	13.5389	11.6535	10.7581	6.28501	12.9819	11.5651	11.6256	11.7544	8.74609	9.06855
sp|O75251|NDUS7_HUMAN	O75251	12.8448	11.9304	11.6479	11.3996	11.3914	12.5621	9.1404	9.21982	9.70092	9.6037	8.43759	9.83295	8.76517	8.98104	9.0127	8.58034	9.20969	13.8622	11.6845	12.2791	10.862	9.92247	1.09469	0.205687	0.335387		sp|O75251|NDUS7_HUMAN	NDUFS7	NADH dehydrogenase [ubiquinone] iron-sulfur protein 7, mitochondrial OS=Homo sapiens OX=9606 GN=NDUFS7 PE=1 SV=3	7	6	11.8029	11.3726	11.3188	10.8057	11.0244	8.23354	9.83295	8.55736	8.42183	8.6299	11.6572	8.27954	8.61008	8.83594	8.53194	8.55	8.9818
sp|O75298|RTN2_HUMAN	O75298	23.02	12.7823	14.0346	12.9491	15.2067						4.60177	4.80719	4.50438	3.127	9.82292						15.2068	4.97925	3.05403	0.000802695	0.00693693		sp|O75298|RTN2_HUMAN	RTN2	Reticulon-2 OS=Homo sapiens OX=9606 GN=RTN2 PE=1 SV=1	1	0	21.1528	12.1847	13.638	12.2744	14.7168	4.49049	4.80719	4.39759	2.93229	9.40571	0	0	0	0	0	0	0
sp|O75306|NDUS2_HUMAN	O75306	11.8675	11.3935	11.7812	11.8398	11.5863	11.2801	8.70245	9.31765	9.86435	8.66894	8.33356	9.80212	8.35823	9.15714	10.0978	7.14418	9.34097	13.6709	13.9993	13.7972	10.5506	10.1072	1.04388	0.628346	0.735957		sp|O75306|NDUS2_HUMAN	NDUFS2	NADH dehydrogenase [ubiquinone] iron-sulfur protein 2, mitochondrial OS=Homo sapiens OX=9606 GN=NDUFS2 PE=1 SV=2	39	27	10.9049	10.8608	11.4483	11.2229	11.213	8.13203	9.80212	8.16007	8.58696	9.66896	10.4675	7.88284	8.70144	8.9848	7.70149	7.11892	9.10983
sp|O75312|ZPR1_HUMAN	O75312	11.3384	7.14343	5.31799	7.27074	9.494	7.92923	9.10273	9.37509	9.39382	9.54163	12.5566	8.53752	14.4042	15.5539	12.6217	12.6781	12.0782	12.4055	11.0009	11.9941	8.42573	12.2482	1.45366	0.000301039	0.00363397	3	sp|O75312|ZPR1_HUMAN	ZPR1	Zinc finger protein ZPR1 OS=Homo sapiens OX=9606 GN=ZPR1 PE=1 SV=1	1	3	10.4187	6.80946	5.16772	6.89192	9.18813	12.2529	8.53752	14.0627	14.5854	12.0856	7.35803	8.24542	8.75508	8.55623	8.47679	12.6333	11.7793
sp|O75323|NIPS2_HUMAN	O75323	15.0514	12.6706	12.4535	12.8273	12.5885	13.8303	8.87697	11.182	11.2535	11.273	6.83529	7.50697	7.08419	8.62305	8.84405	8.70215	8.92823	11.0361	10.6754	10.4281	12.0913	8.75512	1.38105	0.000209612	0.00299081	1	sp|O75323|NIPS2_HUMAN	NIPSNAP2	Protein NipSnap homolog 2 OS=Homo sapiens OX=9606 GN=NIPSNAP2 PE=1 SV=1	33	24	13.8306	12.0782	12.1016	12.159	12.1829	6.66999	7.50697	6.91624	8.08613	8.46842	12.834	8.04092	10.4425	10.2501	10.0149	8.67138	8.7073
sp|O75326|SEM7A_HUMAN	O75326	8.89593	12.9471	11.5371	11.2956	9.91927	6.75917	7.71051	8.14619	7.76341	10.3495	11.806	8.74562	6.76024	11.3972	10.8743	15.4324	18.0184	12.3375	9.78507	8.81397	9.34491	10.9854	1.17555	0.16456	0.286183		sp|O75326|SEM7A_HUMAN	SEMA7A	Semaphorin-7A OS=Homo sapiens OX=9606 GN=SEMA7A PE=1 SV=1	1	1	8.17437	12.3418	11.2111	10.7071	9.5997	11.5205	8.74562	6.59997	10.6875	10.4124	6.27225	6.98432	7.60745	7.07119	9.19448	15.3778	17.5725
sp|O75340|PDCD6_HUMAN	O75340	13.9241	11.199	10.3607	11.9691	11.2633	10.6099	11.2879	10.7938	11.2453	11.6325	8.77782	8.65126	8.17803	10.1371	9.93107	8.83437	11.8256	9.73381	10.1183	10.1249	11.3925	9.58033	1.18916	0.000776132	0.00677925		sp|O75340|PDCD6_HUMAN	PDCD6	Programmed cell death protein 6 OS=Homo sapiens OX=9606 GN=PDCD6 PE=1 SV=1	12	11	12.7947	10.6754	10.0679	11.3455	10.9004	8.56555	8.65126	7.98414	9.50588	9.50927	9.8456	10.2248	10.08	10.2426	10.3343	8.80314	11.533
sp|O75347|TBCA_HUMAN	O75347	8.57908	8.05287	9.23534	10.1974	10.0739	6.44545	8.04723	7.66399	7.78027	8.08903	11.6459	11.5111	10.3863	14.24	10.1113	14.623	12.4532	13.9178	12.7223	13.305	8.34599	12.4009	1.48585	2.86779e-06	0.000266864	3	sp|O75347|TBCA_HUMAN	TBCA	Tubulin-specific chaperone A OS=Homo sapiens OX=9606 GN=TBCA PE=1 SV=3	9	20	7.88322	7.67639	8.97438	9.66614	9.74932	11.3643	11.5111	10.1401	13.3533	9.68185	5.98113	7.28933	7.15714	7.08655	7.1863	14.5713	12.145
sp|O75348|VATG1_HUMAN	O75348	10.9367	9.67972	11.469	10.8265	12.1826	6.65919	9.12356	9.78349	9.28436	8.72685	7.81979	10.0315	8.30136	13.2674	9.7311	11.2322	8.0421	15.5665	13.3898	13.6532	9.74359	10.8011	1.10854	0.291671	0.428298		sp|O75348|VATG1_HUMAN	ATP6V1G1	V-type proton ATPase subunit G 1 OS=Homo sapiens OX=9606 GN=ATP6V1G1 PE=1 SV=3	4	5	10.0496	9.22718	11.1449	10.2624	11.7901	7.63068	10.0315	8.10455	12.4413	9.31779	6.17948	8.26429	9.13647	8.45653	7.75294	11.1925	7.8431
sp|O75351|VPS4B_HUMAN	O75351	9.99776	9.70575	9.25801	10.4017	10.4492	8.34852	10.7878	11.5838	10.8247	12.1925	11.1825	10.2058	10.0962	10.9029	11.899	8.65254	11.7978	12.1016	9.56587	10.2394	10.3004	10.6106	1.03011	0.546392	0.666527		sp|O75351|VPS4B_HUMAN	VPS4B	Vacuolar protein sorting-associated protein 4B OS=Homo sapiens OX=9606 GN=VPS4B PE=1 SV=2	19	16	9.18683	9.25199	8.99641	9.85972	10.1126	10.9121	10.2058	9.85686	10.224	11.3936	7.74711	9.77178	10.8177	9.8595	10.8318	8.62195	11.5059
sp|O75352|MPU1_HUMAN	O75352	9.94215	12.2131	10.3491	11.0171	9.71188	18.4072	14.6507	11.8252	15.7366	10.8993	10.2121	11.6029	10.0812	10.2439	8.67557	3.93389	5.9273	6.47474	9.85788	9.50057	12.2083	8.27254	1.47576	0.00607772	0.0279788	2	sp|O75352|MPU1_HUMAN	MPDU1	Mannose-P-dolichol utilization defect 1 protein OS=Homo sapiens OX=9606 GN=MPDU1 PE=1 SV=2	2	2	9.13573	11.6421	10.0567	10.4431	9.39899	9.96513	11.6029	9.84222	9.60602	8.30709	17.0812	13.2709	11.0432	14.3335	9.68295	3.91998	5.78063
sp|O75356|ENTP5_HUMAN	O75356	11.1779	11.5905	10.7982	10.8428	10.2271	8.94403	9.81614	11.1593	12.1663	11.0306	10.2797	10.7163	10.444	9.1549	8.85909	12.5433	9.56807	10.5551	9.94669	10.2256	10.7388	10.1859	1.05428	0.215548	0.34649		sp|O75356|ENTP5_HUMAN	ENTPD5	Ectonucleoside triphosphate diphosphohydrolase 5 OS=Homo sapiens OX=9606 GN=ENTPD5 PE=1 SV=1	4	4	10.2712	11.0486	10.4931	10.2779	9.89762	10.0311	10.7163	10.1964	8.58486	8.48282	8.29972	8.89164	10.4213	11.0815	9.7996	12.499	9.33131
sp|O75365|TP4A3_HUMAN	O75365	11.6799	11.3291	12.2812	10.5519	9.42247	15.2908	10.4646	15.0031	10.5934	7.00358	7.65732	12.9865	8.6976	7.89833	11.5467	0.559464	7.2166	11.179	13.3129	15.8073	11.1149	7.71721	1.44028	0.252026	0.388136		sp|O75365|TP4A3_HUMAN	PTP4A3	Protein tyrosine phosphatase type IVA 3 OS=Homo sapiens OX=9606 GN=PTP4A3 PE=1 SV=2	4	1	10.7325	10.7994	11.9342	10.0021	9.1189	7.47214	12.9865	8.49139	7.40653	11.0563	14.1893	9.47902	14.0109	9.64885	6.22199	0.557486	7.03803
sp|O75367|H2AY_HUMAN	O75367	14.4848	12.0993	12.9251	11.2242	11.7327	19.8765	9.8905	9.23242	9.06899	10.0899	9.65159	8.9053	9.57467	7.22901	6.42535	8.35959	8.84376	9.98723	9.63202	11.2467	11.7354	8.88251	1.32118	0.00697808	0.0305927	1	sp|O75367|H2AY_HUMAN	H2AFY	Core histone macro-H2A.1 OS=Homo sapiens OX=9606 GN=H2AFY PE=1 SV=4	51	44	13.3099	11.5336	12.5599	10.6394	11.3547	9.41819	8.9053	9.34767	6.77889	6.15245	18.4446	8.95899	8.62184	8.26036	8.96392	8.33003	8.62492
sp|O75368|SH3L1_HUMAN	O75368	8.25747	9.11465	8.97591	10.3046	8.65954	5.99416	10.6137	11.8431	11.7237	11.7872	11.2712	10.8802	10.614	11.8605	14.0883	11.5344	10.0873	10.929	10.4527	11.0138	9.54494	11.2279	1.17631	0.0390428	0.101131		sp|O75368|SH3L1_HUMAN	SH3BGRL	SH3 domain-binding glutamic acid-rich-like protein OS=Homo sapiens OX=9606 GN=SH3BGRL PE=1 SV=1	22	24	7.58769	8.68853	8.72228	9.76774	8.38055	10.9986	10.8802	10.3624	11.122	13.4899	5.56235	9.61411	11.0599	10.6784	10.4718	11.4936	9.83774
sp|O75369|FLNB_HUMAN	O75369	9.50837	9.05462	9.11425	9.67172	10.3806	9.48897	15.6407	11.0986	11.3421	13.6118	15.1517	9.83014	11.858	10.614	8.78868	8.81221	9.07131	10.6608	8.48265	8.37927	10.7196	9.99797	1.07218	0.410512	0.546272		sp|O75369|FLNB_HUMAN	FLNB	Filamin-B OS=Homo sapiens OX=9606 GN=FLNB PE=1 SV=2	243	223	8.73713	8.6313	8.85671	9.16781	10.0462	14.7853	9.83014	11.5769	9.95308	8.4154	8.80541	14.1676	10.3646	10.3308	12.0927	8.78105	8.84684
sp|O75376|NCOR1_HUMAN	O75376						8.73252	8.88184	10.4069	10.3019	9.43118						11.8778	11.6699	12.7656	10.2671	11.2694	9.52554	11.5408	1.21157	0.00547411	0.0262058		sp|O75376|NCOR1_HUMAN	NCOR1	Nuclear receptor corepressor 1 OS=Homo sapiens OX=9606 GN=NCOR1 PE=1 SV=2	0	2	0	0	0	0	0	0	0	0	0	0	8.10345	8.04533	9.71861	9.38338	8.37867	11.8358	11.3811
sp|O75379|VAMP4_HUMAN	O75379	11.4641	10.0856	11.1324	11.5201	12.2891	13.0598	11.1096	9.31728	8.4072	9.4993	10.6366	9.30307	9.45456	9.69362	8.58241	12.3899	13.3671	9.49493	8.79414	10.3354	10.7001	10.1071	1.05867	0.375265	0.514517		sp|O75379|VAMP4_HUMAN	VAMP4	Vesicle-associated membrane protein 4 OS=Homo sapiens OX=9606 GN=VAMP4 PE=1 SV=2	1	2	10.5342	9.61411	10.8178	10.9199	11.8932	10.3794	9.30307	9.23041	9.09004	8.21789	12.119	10.0633	8.70109	7.65758	8.43919	12.3461	13.0363
sp|O75380|NDUS6_HUMAN	O75380	10.4408	10.9884	10.4182	10.9395	11.6703	9.60763	7.00887	7.7181	8.66168	9.49074	8.18434	8.47785	11.894	9.08265	12.0626	8.92074	9.33316	17.219	13.4717	14.0073	9.58124	10.9357	1.14137	0.182017	0.308294		sp|O75380|NDUS6_HUMAN	NDUFS6	NADH dehydrogenase [ubiquinone] iron-sulfur protein 6, mitochondrial OS=Homo sapiens OX=9606 GN=NDUFS6 PE=1 SV=1	7	9	9.59395	10.4747	10.1238	10.3695	11.2943	7.98642	8.47785	11.612	8.51711	11.5503	8.91552	6.34876	7.20767	7.88937	8.43158	8.8892	9.10221
sp|O75381|PEX14_HUMAN	O75381	11.2924	11.4926	13.2482	12.3966	10.1712	15.2517	13.158	9.9281	9.78271	11.3467	8.37169	10.4315	9.78366	9.15202	7.79658	7.60327	9.05672	10.4747	9.41908	10.3972	11.697	9.19204	1.27251	0.000655068	0.00603759	2	sp|O75381|PEX14_HUMAN	PEX14	Peroxisomal membrane protein PEX14 OS=Homo sapiens OX=9606 GN=PEX14 PE=1 SV=1	6	2	10.3765	10.9553	12.8739	11.7507	9.84351	8.16924	10.4315	9.55171	8.58216	7.46544	14.153	11.9188	9.27152	8.91044	10.0804	7.57639	8.83261
sp|O75382|TRIM3_HUMAN	O75382	8.35277	10.5431	9.41524	10.0661	9.86144	10.838	11.9478	9.54836	9.61128	10.2137	12.0238	11.5619	10.4177	10.2342	11.4644	11.2323	11.2988	10.062	10.9703	10.2186	9.99899	10.9296	1.09307	0.0232341	0.0698676		sp|O75382|TRIM3_HUMAN	TRIM3	Tripartite motif-containing protein 3 OS=Homo sapiens OX=9606 GN=TRIM3 PE=1 SV=2	5	3	7.67526	10.0502	9.1492	9.54161	9.54373	11.733	11.5619	10.1707	9.59696	10.9775	10.0573	10.8225	8.91689	8.7543	9.07384	11.1926	11.0192
sp|O75385|ULK1_HUMAN	O75385						8.72567	7.18365	10.9957	14.8126	10.9442						5.50173	7.84231	14.6285	11.4445	14.0589	10.2244	10.0309	1.01929	0.940915	0.960233		sp|O75385|ULK1_HUMAN	ULK1	Serine/threonine-protein kinase ULK1 OS=Homo sapiens OX=9606 GN=ULK1 PE=1 SV=2	0	1	0	0	0	0	0	0	0	0	0	0	8.09709	6.50708	10.2685	13.4918	9.72284	5.48228	7.64825
sp|O75390|CISY_HUMAN	O75390	12.994	12.2345	12.3683	11.5261	11.5107	14.429	9.22608	10.7034	10.9469	11.7999	8.14104	9.65082	8.69515	8.22077	8.89826	6.42472	8.16082	9.98062	12.6254	12.0738	11.6987	9.12131	1.28257	0.00329698	0.0182221	1	sp|O75390|CISY_HUMAN	CS	Citrate synthase, mitochondrial OS=Homo sapiens OX=9606 GN=CS PE=1 SV=2	45	42	11.94	11.6625	12.0188	10.9256	11.1399	7.94417	9.65082	8.489	7.7089	8.52032	13.3896	8.35715	9.99553	9.97079	10.483	6.40201	7.95888
sp|O75391|SPAG7_HUMAN	O75391	8.59084	8.73246	10.0011	8.14926	9.19673	11.3847	12.706	10.3209	9.48517	12.2339	13.1506	10.5772	12.3186	10.3669	12.8251	9.65263	9.59066	10.6795	9.99528	10.1874	9.97385	10.8655	1.0894	0.177286	0.301832		sp|O75391|SPAG7_HUMAN	SPAG7	Sperm-associated antigen 7 OS=Homo sapiens OX=9606 GN=SPAG7 PE=1 SV=2	2	1	7.89402	8.3242	9.71852	7.72467	8.90044	12.8326	10.5772	12.0265	9.72139	12.2804	10.5646	11.5093	9.63833	8.63943	10.8686	9.6185	9.35334
sp|O75394|RM33_HUMAN	O75394						14.0118	11.57	10.5139	10.7098	10.5975						10.0315	8.24368	10.8698	10.4851	9.17491	11.4108	9.71352	1.17473	0.0602131	0.137845		sp|O75394|RM33_HUMAN	MRPL33	39S ribosomal protein L33, mitochondrial OS=Homo sapiens OX=9606 GN=MRPL33 PE=1 SV=1	0	1	0	0	0	0	0	0	0	0	0	0	13.0024	10.4803	9.81862	9.75485	9.41483	9.99604	8.03969
sp|O75396|SC22B_HUMAN	O75396	10.2506	10.2871	10.3447	11.2564	9.9025	7.45814	9.5388	10.8004	11.1145	10.339	10.2877	10.6163	11.0624	11.1094	8.97717	10.4717	11.9033	12.0417	10.5674	11.552	10.0713	10.8242	1.07476	0.131277	0.241969		sp|O75396|SC22B_HUMAN	SEC22B	Vesicle-trafficking protein SEC22b OS=Homo sapiens OX=9606 GN=SEC22B PE=1 SV=4	25	27	9.41916	9.80612	10.0524	10.6699	9.58347	10.0389	10.6163	10.8001	10.4177	8.59588	6.92087	8.64042	10.0861	10.1235	9.18521	10.4347	11.6088
sp|O75400|PR40A_HUMAN	O75400	12.9034	13.1604	12.4171	11.6084	12.5115	12.5105	8.87211	10.1617	9.98148	8.9325	7.27878	7.99067	7.68968	9.05246	9.74429	9.36433	10.5927	12.6044	11.1181	11.652	11.1905	9.56204	1.17031	0.0526555	0.1251		sp|O75400|PR40A_HUMAN	PRPF40A	Pre-mRNA-processing factor 40 homolog A OS=Homo sapiens OX=9606 GN=PRPF40A PE=1 SV=2	18	16	11.8568	12.5451	12.0662	11.0036	12.1084	7.10276	7.99067	7.50737	8.4888	9.33042	11.6093	8.03652	9.48963	9.09149	7.93564	9.33122	10.3306
sp|O75410|TACC1_HUMAN	O75410	9.94381	10.1902	10.4648	9.18811	7.32466	7.56219	7.7659	11.4347	11.7253	8.07516	9.8331	12.5782	11.7064	11.8662	10.9157	8.1157	8.25305	14.4082	12.957	15.3828	9.24021	11.3689	1.23037	0.0292449	0.0818576	4	sp|O75410|TACC1_HUMAN	TACC1	Transforming acidic coiled-coil-containing protein 1 OS=Homo sapiens OX=9606 GN=TACC1 PE=1 SV=2	19	15	9.13725	9.71378	10.1691	8.7094	7.08868	9.59531	12.5782	11.4289	11.1273	10.4521	7.01743	7.03449	10.6785	10.6798	7.17398	8.08701	8.04883
sp|O75414|NDK6_HUMAN	O75414	11.4104	11.4961	11.5237	10.5928	12.5647						8.44522	8.44755	9.47	8.95459	11.3067						11.5006	9.26861	1.24081	0.00729554	0.0314349		sp|O75414|NDK6_HUMAN	NME6	Nucleoside diphosphate kinase 6 OS=Homo sapiens OX=9606 GN=NME6 PE=1 SV=3	3	0	10.4849	10.9586	11.1981	10.0409	12.1599	8.24099	8.44755	9.24548	8.39702	10.8265	0	0	0	0	0	0	0
sp|O75420|GGYF1_HUMAN	O75420	9.47168	10.5796	10.2555	9.0797	9.11808						9.43799	11.3568	9.72275	10.8631	14.1713						9.68202	10.9915	1.13525	0.14536	0.260661		sp|O75420|GGYF1_HUMAN	GIGYF1	GRB10-interacting GYF protein 1 OS=Homo sapiens OX=9606 GN=GIGYF1 PE=1 SV=2	1	0	8.70342	10.085	9.96575	8.60663	8.82432	9.20975	11.3568	9.49224	10.1867	13.5694	0	0	0	0	0	0	0
sp|O75427|LRCH4_HUMAN	O75427	10.9219	12.2002	11.047	10.7772	9.90098	10.9288	10.4695	11.886	12.502	9.82816	9.51931	11.5799	9.05858	10.3931	8.71291	6.68351	10.1764	10.5237	11.8692	11.3623	11.0131	9.86491	1.11639	0.082471	0.17422		sp|O75427|LRCH4_HUMAN	LRCH4	Leucine-rich repeat and calponin homology domain-containing protein 4 OS=Homo sapiens OX=9606 GN=LRCH4 PE=1 SV=2	1	2	10.036	11.6298	10.7349	10.2157	9.582	9.2891	11.5799	8.84382	9.74592	8.34285	10.1415	9.48349	11.0999	11.3873	8.73135	6.65988	9.92459
sp|O75431|MTX2_HUMAN	O75431	12.2725	11.84	12.139	11.6047	11.5622	11.8905	8.76991	12.1358	12.0587	10.0338	7.78328	9.61982	9.04315	9.66778	8.71111	8.00971	8.24944	10.4486	12.3218	12.2326	11.3741	9.49149	1.19835	0.00909794	0.0363856		sp|O75431|MTX2_HUMAN	MTX2	Metaxin-2 OS=Homo sapiens OX=9606 GN=MTX2 PE=1 SV=1	9	9	11.2771	11.2865	11.796	11.0001	11.1897	7.59506	9.61982	8.82875	9.06581	8.34112	11.0339	7.94394	11.3332	10.9835	8.914	7.98139	8.04531
sp|O75436|VP26A_HUMAN	O75436	8.269	8.7647	8.50642	8.5781	8.51162	11.394	13.0209	12.5633	13.561	11.9251	12.7226	14.0134	13.3857	10.9021	10.1222	7.3641	8.5654	8.34229	9.96743	9.9547	10.3098	10.3236	1.00134	0.988277	0.991537		sp|O75436|VP26A_HUMAN	VPS26A	Vacuolar protein sorting-associated protein 26A OS=Homo sapiens OX=9606 GN=VPS26A PE=1 SV=2	34	31	7.59829	8.35494	8.26606	8.13117	8.2374	12.4149	14.0134	13.0683	10.2233	9.6923	10.5732	11.7946	11.7324	12.3518	10.5943	7.33806	8.35345
sp|O75438|NDUB1_HUMAN	O75438	8.31063	9.95973	11.7363	10.8292	11.3135	8.57747	7.68339	7.70078	7.9793	9.63344	9.93929	11.1972	10.4824	9.93831	10.2359	12.9837	12.0846	13.2093	12.7497	12.706	9.26147	11.4826	1.23982	0.00315478	0.0178365	3	sp|O75438|NDUB1_HUMAN	NDUFB1	NADH dehydrogenase [ubiquinone] 1 beta subcomplex subunit 1 OS=Homo sapiens OX=9606 GN=NDUFB1 PE=1 SV=1	2	3	7.63654	9.4941	11.4047	10.265	10.949	9.69893	11.1972	10.2339	9.31949	9.80111	7.95957	6.95975	7.1915	7.26783	8.55836	12.9378	11.7856
sp|O75439|MPPB_HUMAN	O75439	12.6039	11.9781	11.9135	10.8633	9.92301	13.7008	9.74294	10.5809	10.604	9.35305	8.72226	10.4332	9.79019	8.85219	9.10596	6.78441	8.74172	13.4302	11.8702	11.2556	11.0508	9.73471	1.13519	0.0974119	0.196764		sp|O75439|MPPB_HUMAN	PMPCB	Mitochondrial-processing peptidase subunit beta OS=Homo sapiens OX=9606 GN=PMPCB PE=1 SV=2	9	10	11.5816	11.4181	11.5769	10.2973	9.60332	8.51133	10.4332	9.55808	8.301	8.7192	12.7138	8.82533	9.88115	9.65851	8.30926	6.76042	8.52541
sp|O75446|SAP30_HUMAN	O75446	15.9259	14.0966	14.9602	15.2794	15.7052	8.33812	7.96536	17.1214	15.0098	10.6579	4.15485	6.57664	3.63244	5.6028	8.64421	6.62919	8.49647	11.5691	10.7414	9.80233	13.0803	7.10931	1.83988	0.000777664	0.00678227	1	sp|O75446|SAP30_HUMAN	SAP30	Histone deacetylase complex subunit SAP30 OS=Homo sapiens OX=9606 GN=SAP30 PE=1 SV=1	4	2	14.6341	13.4376	14.5375	14.4833	15.1992	4.05437	6.57664	3.54632	5.25394	8.27706	7.73746	7.21517	15.9891	13.6715	9.46851	6.60575	8.28623
sp|O75448|MED24_HUMAN	O75448	13.7007	10.3095	10.6136	12.5581	9.54677	10.4018	10.7865	9.81889	9.67531	11.5483	10.4522	9.04218	8.71035	10.404	9.00725	9.72664	11.9589	10.9016	10.4254	10.7538	10.8264	10.0928	1.07269	0.167566	0.28982		sp|O75448|MED24_HUMAN	MED24	Mediator of RNA polymerase II transcription subunit 24 OS=Homo sapiens OX=9606 GN=MED24 PE=1 SV=1	1	3	12.5894	9.82756	10.3137	11.9038	9.2392	10.1994	9.04218	8.50384	9.75616	8.62469	9.65248	9.77062	9.16953	8.81262	10.2595	9.69225	11.663
sp|O75449|KTNA1_HUMAN	O75449	12.3968	11.6255	11.3793	10.3177	10.7524	9.25274	12.4948	12.0782	11.9635	9.6644	9.42648	9.83076	8.18653	10.9622	9.3798	9.4814	8.51049	9.85551	11.9931	10.8945	11.1377	9.79213	1.13741	0.0182816	0.059238		sp|O75449|KTNA1_HUMAN	KATNA1	Katanin p60 ATPase-containing subunit A1 OS=Homo sapiens OX=9606 GN=KATNA1 PE=1 SV=1	4	2	11.3913	11.082	11.0578	9.78013	10.406	9.19852	9.83076	7.99244	10.2796	8.98141	8.58619	11.318	11.2794	10.8968	8.58586	9.44788	8.2999
sp|O75460|ERN1_HUMAN	O75460	14.6706	11.5634	8.20238	10.9217	10.0403						8.14455	8.822	10.9252	8.68978	12.3986						10.8818	9.6705	1.12526	0.367263	0.507456		sp|O75460|ERN1_HUMAN	ERN1	Serine/threonine-protein kinase/endoribonuclease IRE1 OS=Homo sapiens OX=9606 GN=ERN1 PE=1 SV=2	1	0	13.4806	11.0228	7.97061	10.3527	9.71681	7.94759	8.822	10.6662	8.1487	11.872	0	0	0	0	0	0	0
sp|O75462|CRLF1_HUMAN	O75462						7.63392	13.1012	15.0319	15.9406	15.5334						7.72363	9.8398	7.97167	7.08158	7.09471	13.0068	7.88287	1.65	0.0101877	0.0393088		sp|O75462|CRLF1_HUMAN	CRLF1	Cytokine receptor-like factor 1 OS=Homo sapiens OX=9606 GN=CRLF1 PE=1 SV=1	0	1	0	0	0	0	0	0	0	0	0	0	7.08399	11.8673	14.0378	14.5193	13.7999	7.69632	9.59632
sp|O75475|PSIP1_HUMAN	O75475	11.9983	11.5473	14.2049	10.7673	13.6639	22.2877	12.8316	9.91562	9.33567	10.297	10.011	8.41096	9.18185	7.09219	7.24722	7.06355	8.58019	8.50746	8.92694	8.85633	12.2949	8.33582	1.47494	0.000338723	0.00390301	1	sp|O75475|PSIP1_HUMAN	PSIP1	PC4 and SFRS1-interacting protein OS=Homo sapiens OX=9606 GN=PSIP1 PE=1 SV=1	17	14	11.0251	11.0074	13.8035	10.2063	13.2237	9.76894	8.41096	8.96416	6.65059	6.93941	20.6821	11.6231	9.25986	8.50326	9.14785	7.03858	8.36787
sp|O75477|ERLN1_HUMAN	O75477	12.9104	11.9645	10.922	11.4392	12.3523	11.1868	7.78422	10.7	11.6198	9.05197	7.73526	9.00363	8.44701	10.0414	9.50986	8.62999	9.61818	12.0965	11.5956	13.5699	10.8856	9.88143	1.10162	0.20606	0.335924		sp|O75477|ERLN1_HUMAN	ERLIN1	Erlin-1 OS=Homo sapiens OX=9606 GN=ERLIN1 PE=1 SV=2	13	12	11.8632	11.4051	10.6134	10.8432	11.9543	7.5482	9.00363	8.24675	9.41615	9.10595	10.3809	7.05109	9.99239	10.5837	8.04178	8.59948	9.38018
sp|O75478|TAD2A_HUMAN	O75478	10.6937	10.5102	10.4114	9.57744	11.3008						10.7909	11.3836	9.90099	9.14967	10.3003						10.4838	10.2767	1.02016	0.675484	0.771445		sp|O75478|TAD2A_HUMAN	TADA2A	Transcriptional adapter 2-alpha OS=Homo sapiens OX=9606 GN=TADA2A PE=1 SV=3	1	0	9.82629	10.0188	10.1172	9.07844	10.9367	10.5299	11.3836	9.66625	8.57996	9.86286	0	0	0	0	0	0	0
sp|O75487|GPC4_HUMAN	O75487	12.0603	11.8649	10.7522	11.561	15.8581	13.2591	16.2062	7.6545	7.31139	16.271	9.61072	5.07873	7.90542	11.3953	8.34692	14.0232	13.0033	5.29877	7.88452	5.58883	11.8629	8.30589	1.42825	0.0256757	0.0749758	2	sp|O75487|GPC4_HUMAN	GPC4	Glypican-4 OS=Homo sapiens OX=9606 GN=GPC4 PE=1 SV=4	6	9	11.0821	11.3102	10.4484	10.9587	15.3472	9.3783	5.07873	7.718	10.6858	7.9924	12.3039	14.6799	7.14828	6.65947	14.4552	13.9736	12.6815
sp|O75489|NDUS3_HUMAN	O75489	12.5521	11.7024	11.6301	12.3358	11.1022	11.1824	8.7263	9.63889	9.74646	9.4761	8.25373	9.00834	8.55311	9.20609	9.94857	9.22285	10.9126	13.0501	11.8204	11.9689	10.735	10.0794	1.06504	0.33608	0.474544		sp|O75489|NDUS3_HUMAN	NDUFS3	NADH dehydrogenase [ubiquinone] iron-sulfur protein 3, mitochondrial OS=Homo sapiens OX=9606 GN=NDUFS3 PE=1 SV=1	16	19	11.534	11.1553	11.3015	11.6931	10.7445	8.05413	9.00834	8.35033	8.63286	9.52602	10.3768	7.90444	9.00143	8.87742	8.41858	9.19024	10.6426
sp|O75494|SRS10_HUMAN	O75494	9.40704	11.0183	9.9222	9.57534	10.6451	15.9318	8.83555	8.8714	8.02367	9.20187	9.98583	11.645	12.963	9.51222	9.26089	13.6333	11.708	10.3325	9.47327	9.63757	9.96602	10.7175	1.0754	0.345241	0.483795		sp|O75494|SRS10_HUMAN	SRSF10	Serine/arginine-rich splicing factor 10 OS=Homo sapiens OX=9606 GN=SRSF10 PE=1 SV=1	7	4	8.64402	10.5032	9.64183	9.07645	10.3021	9.74434	11.645	12.6557	8.91993	8.86755	14.7841	8.0034	8.2847	7.30824	8.17495	13.5851	11.4183
sp|O75503|CLN5_HUMAN	O75503	9.60924	10.0688	9.09991	9.62778	13.1837	13.4893	18.1256	11.5417	12.6264	11.0032	11.5028	10.4307	10.9079	8.79425	10.7495	6.70084	7.94019	8.6813	8.68658	8.09483	11.5921	9.12861	1.26987	0.0123802	0.0448552	2	sp|O75503|CLN5_HUMAN	CLN5	Ceroid-lipofuscinosis neuronal protein 5 OS=Homo sapiens OX=9606 GN=CLN5 PE=1 SV=2	6	7	8.82982	9.59811	8.84278	9.12616	12.759	11.2246	10.4307	10.6493	8.24667	10.2929	12.5176	16.4185	10.7784	11.5006	9.77521	6.67715	7.74371
sp|O75521|ECI2_HUMAN	O75521	13.5407	11.2366	12.2269	11.8292	11.8652	10.3473	9.42645	10.4429	10.1022	11.1973	8.3831	10.1604	8.22541	8.12958	8.64146	8.97784	10.0111	11.4577	12.05	11.974	11.1644	9.69194	1.15192	0.0298969	0.0832233		sp|O75521|ECI2_HUMAN	ECI2	Enoyl-CoA delta isomerase 2, mitochondrial OS=Homo sapiens OX=9606 GN=ECI2 PE=1 SV=4	16	21	12.4424	10.7113	11.8814	11.2129	11.4829	8.18037	10.1604	8.0304	7.62338	8.27443	9.60186	8.53865	9.7523	9.20141	9.94772	8.9461	9.76342
sp|O75528|TADA3_HUMAN	O75528						12.8405	10.8029	6.22355	6.10042	6.31182						12.9657	14.6232	10.2757	14.4436	10.686	8.02296	12.4632	1.55344	0.0365394	0.096554		sp|O75528|TADA3_HUMAN	TADA3	Transcriptional adapter 3 OS=Homo sapiens OX=9606 GN=TADA3 PE=1 SV=1	0	1	0	0	0	0	0	0	0	0	0	0	11.9155	9.78542	5.81196	5.55648	5.60743	12.9199	14.2614
sp|O75530|EED_HUMAN	O75530						14.9502	24.0778	11.2175	11.7378	7.25702						7.77537	6.12046	6.47666	8.53006	8.83861	12.8027	7.46859	1.7142	0.0335919	0.090752		sp|O75530|EED_HUMAN	EED	Polycomb protein EED OS=Homo sapiens OX=9606 GN=EED PE=1 SV=2	0	2	0	0	0	0	0	0	0	0	0	0	13.8732	21.8101	10.4756	10.6912	6.44714	7.74788	5.96901
sp|O75531|BAF_HUMAN	O75531	11.5905	10.7166	11.1474	8.69089	12.2366	14.8755	11.4488	9.82236	11.8739	10.2818	9.72119	10.6694	10.5186	11.491	7.33232	7.54901	10.771	9.84672	10.2238	9.63236	11.1639	9.68322	1.15291	0.0426024	0.107424		sp|O75531|BAF_HUMAN	BANF1	Barrier-to-autointegration factor OS=Homo sapiens OX=9606 GN=BANF1 PE=1 SV=1	25	21	10.6504	10.2156	10.8324	8.23808	11.8424	9.4861	10.6694	10.2692	10.7755	7.02089	13.8039	10.3705	9.17277	10.8152	9.13438	7.52232	10.5045
sp|O75533|SF3B1_HUMAN	O75533	12.7344	12.965	12.5036	11.8245	12.3119	13.6157	10.1792	10.7198	10.7434	11.0387	7.75529	8.09431	7.95074	9.19496	9.00127	9.13672	9.88305	10.4996	10.0445	10.313	11.8138	9.13736	1.29291	3.00932e-05	0.000953578	1	sp|O75533|SF3B1_HUMAN	SF3B1	Splicing factor 3B subunit 1 OS=Homo sapiens OX=9606 GN=SF3B1 PE=1 SV=3	57	50	11.7015	12.3589	12.1503	11.2084	11.9152	7.56774	8.09431	7.76224	8.62243	8.61896	12.6349	9.22053	10.0109	9.78544	9.8068	9.10442	9.6385
sp|O75534|CSDE1_HUMAN	O75534	8.00761	8.73732	8.78993	8.09831	7.95347	7.94161	11.8769	12.3971	12.5921	10.9968	12.0752	14.0379	12.4814	12.5401	11.1037	9.6074	9.34646	10.6896	10.4728	10.2846	9.56558	11.1781	1.16858	0.0525389	0.124862		sp|O75534|CSDE1_HUMAN	CSDE1	Cold shock domain-containing protein E1 OS=Homo sapiens OX=9606 GN=CSDE1 PE=1 SV=2	30	29	7.3581	8.32884	8.54156	7.67638	7.69723	11.7832	14.0379	12.1855	11.7593	10.6321	7.36951	10.7583	11.5772	11.4693	9.76959	9.57343	9.11518
sp|O75554|WBP4_HUMAN	O75554	5.96561	7.6409	12.9167	6.18065	9.00436						16.0261	14.4299	17.8133	6.93505	6.42004						7.99995	11.2898	1.41123	0.218599	0.349914		sp|O75554|WBP4_HUMAN	WBP4	WW domain-binding protein 4 OS=Homo sapiens OX=9606 GN=WBP4 PE=1 SV=1	1	0	5.48173	7.28368	12.5517	5.85863	8.71426	15.6385	14.4299	17.391	6.50323	6.14736	0	0	0	0	0	0	0
sp|O75569|PRKRA_HUMAN	O75569	11.8121	11.1691	12.8563	11.9225	13.1332	17.6076	15.6176	11.0683	10.0794	11.8064	7.2041	7.11158	6.95124	9.49237	12.7052	8.56727	9.52848	7.31344	8.08321	7.0619	12.5405	8.25175	1.51974	6.63962e-05	0.0015141	2	sp|O75569|PRKRA_HUMAN	PRKRA	Interferon-inducible double-stranded RNA-dependent protein kinase activator A OS=Homo sapiens OX=9606 GN=PRKRA PE=1 SV=1	6	6	10.854	10.6469	12.493	11.3013	12.7101	7.02988	7.11158	6.78644	8.90132	12.1656	16.3392	14.1467	10.3363	9.18067	10.4888	8.53698	9.2927
sp|O75582|KS6A5_HUMAN	O75582	10.3244	10.2415	10.4615	10.9055	8.95212	14.8977	12.1371	10.6929	10.6478	13.4618	10.4963	9.88703	9.42395	8.64115	14.7779	4.56831	9.39481	9.93687	10.2803	10.6807	11.1586	9.47768	1.17735	0.132756	0.244044		sp|O75582|KS6A5_HUMAN	RPS6KA5	Ribosomal protein S6 kinase alpha-5 OS=Homo sapiens OX=9606 GN=RPS6KA5 PE=1 SV=1	4	2	9.48694	9.76273	10.1659	10.3373	8.66371	10.2425	9.88703	9.20052	8.1031	14.1502	13.8245	10.994	9.98576	9.69836	11.9595	4.55216	9.16234
sp|O75586|MED6_HUMAN	O75586	10.1091	12.8806	12.3983	11.5049	12.3404	14.8863	13.9693	12.9183	11.946	15.2934	8.44293	9.29005	8.56528	10.0814	8.55491	5.91719	6.79259	8.44514	8.20659	8.7026	12.7383	8.2178	1.55009	1.25153e-06	0.000151077	2	sp|O75586|MED6_HUMAN	MED6	Mediator of RNA polymerase II transcription subunit 6 OS=Homo sapiens OX=9606 GN=MED6 PE=1 SV=2	2	3	9.28915	12.2784	12.048	10.9055	11.9428	8.23875	9.29005	8.36221	9.45365	8.19156	13.8139	12.6536	12.064	10.8808	13.5867	5.89627	6.62451
sp|O75592|MYCB2_HUMAN	O75592	13.8575	9.41294	10.551	11.4347	11.097	10.5813	10.751	10.7256	10.9785	11.0287	9.91492	9.66818	9.34564	9.38503	9.60216	8.54767	11.4471	10.3843	11.1573	10.5197	10.9941	9.96215	1.10359	0.0284701	0.0804926		sp|O75592|MYCB2_HUMAN	MYCBP2	E3 ubiquitin-protein ligase MYCBP2 OS=Homo sapiens OX=9606 GN=MYCBP2 PE=1 SV=4	5	9	12.7335	8.97287	10.2529	10.8389	10.7395	9.67515	9.66818	9.12407	8.80066	9.19433	9.81905	9.73845	10.0163	9.99958	9.7979	8.51745	11.1638
sp|O75600|KBL_HUMAN	O75600	12.9298	11.451	12.5262	11.8734	11.4127	10.2946	8.73552	8.99457	8.21841	8.28869	9.55194	9.23002	8.9731	8.59214	7.68953	9.80292	14.429	11.1524	14.6044	10.9866	10.3309	10.2838	1.00457	0.961103	0.974558		sp|O75600|KBL_HUMAN	GCAT	2-amino-3-ketobutyrate coenzyme A ligase, mitochondrial OS=Homo sapiens OX=9606 GN=GCAT PE=1 SV=1	5	5	11.881	10.9156	12.1723	11.2548	11.045	9.32095	9.23002	8.76036	8.05714	7.36293	9.55299	7.91279	8.39972	7.48562	7.36368	9.76826	14.072
sp|O75608|LYPA1_HUMAN	O75608	10.3864	9.62174	10.2417	8.97347	8.54044	10.8679	9.22239	11.0775	11.2432	9.37381	10.7639	12.9128	12.6281	11.24	8.64245	7.68696	10.28	12.3619	11.8392	12.0025	9.91464	10.8997	1.09936	0.140392	0.254149		sp|O75608|LYPA1_HUMAN	LYPLA1	Acyl-protein thioesterase 1 OS=Homo sapiens OX=9606 GN=LYPLA1 PE=1 SV=1	6	8	9.54393	9.17191	9.95232	8.50594	8.26529	10.5036	12.9128	12.3287	10.5401	8.27538	10.085	8.35381	10.3449	10.2407	8.3277	7.65978	10.0256
sp|O75629|CREG1_HUMAN	O75629	10.1311	9.4922	9.97143	9.6778	9.13754	9.04256	8.86049	12.9062	12.5995	11.662	12.2993	13.4895	12.6397	9.11091	7.8963	8.47684	10.0317	10.6144	11.049	10.9305	10.2567	10.5101	1.02471	0.730938	0.813758		sp|O75629|CREG1_HUMAN	CREG1	Protein CREG1 OS=Homo sapiens OX=9606 GN=CREG1 PE=1 SV=1	4	10	9.30932	9.04842	9.68967	9.17357	8.84315	12.0019	13.4895	12.34	8.54361	7.56092	8.39115	8.02599	12.0527	11.4761	10.3605	8.44687	9.78342
sp|O75643|U520_HUMAN	O75643	12.509	11.8734	11.8227	11.3597	11.0631	15.2598	10.9975	10.5914	11.0132	9.80374	9.09433	9.5734	9.11103	9.12249	8.69628	8.74531	9.24596	10.0598	10.1856	10.3266	11.5528	9.39964	1.22906	0.000126904	0.00224443	1	sp|O75643|U520_HUMAN	SNRNP200	U5 small nuclear ribonucleoprotein 200 kDa helicase OS=Homo sapiens OX=9606 GN=SNRNP200 PE=1 SV=2	93	100	11.4944	11.3183	11.4886	10.7678	10.7067	8.8744	9.5734	8.89502	8.55447	8.32692	14.1605	9.96174	9.89095	10.0312	8.70965	8.71439	9.01717
sp|O75648|MTU1_HUMAN	O75648	15.9704	13.778	13.8601	12.3852	12.6078						5.45646	7.83637	6.94706	8.2442	7.42226						13.6635	7.11054	1.92159	5.39798e-05	0.00136384		sp|O75648|MTU1_HUMAN	TRMU	Mitochondrial tRNA-specific 2-thiouridylase 1 OS=Homo sapiens OX=9606 GN=TRMU PE=1 SV=2	2	0	14.675	13.1339	13.4685	11.7399	12.2016	5.32451	7.83637	6.78236	7.73087	7.10701	0	0	0	0	0	0	0
sp|O75663|TIPRL_HUMAN	O75663	9.23791	8.91443	9.76438	10.1488	9.09691	7.8878	11.3064	10.0037	10.3218	11.0803	12.3971	10.4997	11.3373	11.335	11.2861	10.8034	13.4223	10.8465	10.1549	10.0534	9.72605	11.1728	1.14875	0.00565848	0.0267617		sp|O75663|TIPRL_HUMAN	TIPRL	TIP41-like protein OS=Homo sapiens OX=9606 GN=TIPRL PE=1 SV=2	12	8	8.48861	8.49767	9.48847	9.62004	8.80383	12.0973	10.4997	11.0685	10.6292	10.8067	7.31958	10.2415	9.34216	9.40146	9.84371	10.7652	13.0902
sp|O75674|TM1L1_HUMAN	O75674	10.0292	9.74325	11.421	10.2856	10.8297	10.8261	9.7723	10.8725	11.1989	8.12004	9.21226	11.2526	9.54749	10.073	11.6537	11.3117	10.2731	10.3214	12.0541	11.0423	10.2661	10.6373	1.03615	0.408102	0.543909		sp|O75674|TM1L1_HUMAN	TOM1L1	TOM1-like protein 1 OS=Homo sapiens OX=9606 GN=TOM1L1 PE=1 SV=2	5	8	9.21576	9.28774	11.0983	9.74969	10.4808	8.98948	11.2526	9.32113	9.44581	11.1587	10.0462	8.85193	10.1535	10.2004	7.21385	11.2717	10.0189
sp|O75676|KS6A4_HUMAN	O75676						11.1914	14.397	11.6856	13.7929	11.5657						6.16715	10.9176	8.57584	9.1021	9.29259	12.4603	8.66469	1.43805	0.00911823	0.0364202		sp|O75676|KS6A4_HUMAN	RPS6KA4	Ribosomal protein S6 kinase alpha-4 OS=Homo sapiens OX=9606 GN=RPS6KA4 PE=1 SV=1	0	1	0	0	0	0	0	0	0	0	0	0	10.3852	13.0411	10.9128	12.5631	10.275	6.14535	10.6474
sp|O75688|PPM1B_HUMAN	O75688	8.25833	8.50062	9.28437	9.05204	8.1764	8.43915	10.4967	11.836	11.183	9.47751	12.1181	13.4895	11.319	11.8792	11.789	8.20631	8.92012	13.2551	11.801	12.3381	9.39553	11.3856	1.21181	0.00894996	0.036032	4	sp|O75688|PPM1B_HUMAN	PPM1B	Protein phosphatase 1B OS=Homo sapiens OX=9606 GN=PPM1B PE=1 SV=1	22	24	7.58848	8.1032	9.02203	8.58042	7.91298	11.825	13.4895	11.0506	11.1395	11.2883	7.83121	9.50811	11.0532	10.1859	8.41983	8.1773	8.69939
sp|O75691|UTP20_HUMAN	O75691	12.072	11.249	11.7985	11.9889	12.1132	15.0971	13.3155	9.61589	10.7964	8.96251	8.97083	8.53802	8.55653	8.84102	10.1258	8.95345	9.26897	9.6178	10.4628	10.1664	11.5843	9.32681	1.24204	0.000669512	0.00612787	2	sp|O75691|UTP20_HUMAN	UTP20	Small subunit processome component 20 homolog OS=Homo sapiens OX=9606 GN=UTP20 PE=1 SV=3	6	4	11.0928	10.7231	11.4651	11.3643	11.7229	8.75389	8.53802	8.35367	8.29053	9.69574	14.0095	12.0614	8.97995	9.83376	7.9623	8.9218	9.03961
sp|O75694|NU155_HUMAN	O75694	11.2006	11.471	11.5267	10.6959	10.8259	12.8472	9.98836	10.7718	10.7772	9.82013	9.72465	10.4911	10.1868	9.09095	8.88312	9.82239	9.57671	9.95031	11.5041	10.9904	10.9634	9.99319	1.09708	0.0161875	0.0544569		sp|O75694|NU155_HUMAN	NUP155	Nuclear pore complex protein Nup155 OS=Homo sapiens OX=9606 GN=NUP155 PE=1 SV=1	31	29	10.2921	10.9347	11.201	10.1386	10.4771	9.48948	10.4911	9.94527	8.52489	8.50583	11.9217	9.04764	10.0594	9.81628	8.72421	9.78766	9.33974
sp|O75695|XRP2_HUMAN	O75695	11.2965	11.8793	11.2733	12.829	11.4462	12.7946	11.56	10.2414	10.4783	12.5814	9.42658	7.86287	8.02196	9.98074	10.2875	9.66594	11.3494	9.05328	9.07749	9.49554	11.6065	9.37174	1.23846	8.41634e-05	0.0017488	2	sp|O75695|XRP2_HUMAN	RP2	Protein XRP2 OS=Homo sapiens OX=9606 GN=RP2 PE=1 SV=4	7	3	10.3802	11.3239	10.9548	12.1606	11.0774	9.19862	7.86287	7.83177	9.35928	9.85059	11.8729	10.4713	9.56408	9.54402	11.1773	9.63177	11.0686
sp|O75711|SCRG1_HUMAN	O75711	4.83286	6.49972	5.78427	5.81946	9.61831						17.1161	17.8001	16.4744	11.2347	8.14236						6.33091	13.5641	2.14252	0.00399426	0.0208699		sp|O75711|SCRG1_HUMAN	SCRG1	Scrapie-responsive protein 1 OS=Homo sapiens OX=9606 GN=SCRG1 PE=1 SV=1	1	0	4.44086	6.19585	5.62083	5.51626	9.30843	16.7022	17.8001	16.0838	10.5352	7.79653	0	0	0	0	0	0	0
sp|O75718|CRTAP_HUMAN	O75718	9.47982	10.8144	9.9725	10.5924	10.2125	11.6132	14.5645	9.60986	10.125	13.2527	13.3467	9.48738	12.1636	10.1485	7.79367	9.73099	11.9835	8.67782	8.6139	8.26263	10.9204	9.87005	1.10642	0.183754	0.310613		sp|O75718|CRTAP_HUMAN	CRTAP	Cartilage-associated protein OS=Homo sapiens OX=9606 GN=CRTAP PE=1 SV=1	29	29	8.7109	10.3088	9.69071	10.0405	9.88346	13.0239	9.48738	11.8752	9.51658	7.46265	10.7766	13.1928	8.97432	9.22225	11.7737	9.69659	11.687
sp|O75746|CMC1_HUMAN	O75746	13.4107	11.332	11.6165	10.6062	14.2618	14.0422	10.2313	10.7707	10.8655	9.7852	8.25658	8.91036	8.10995	8.10172	9.65867	6.87853	10.3599	9.78189	11.9127	11.5824	11.5952	9.23058	1.25618	0.00407839	0.0212084	1	sp|O75746|CMC1_HUMAN	SLC25A12	Calcium-binding mitochondrial carrier protein Aralar1 OS=Homo sapiens OX=9606 GN=SLC25A12 PE=1 SV=2	33	35	12.3229	10.8022	11.2883	10.0536	13.8023	8.05691	8.91036	7.91768	7.59726	9.24844	13.0306	9.26771	10.0584	9.89664	8.69318	6.85421	10.1035
sp|O75764|TCEA3_HUMAN	O75764	6.26864	6.58678	11.0734	10.8551	12.1232						18.2203	10.6433	14.9366	6.37121	6.47348						9.0339	10.3621	1.14703	0.600254	0.713828		sp|O75764|TCEA3_HUMAN	TCEA3	Transcription elongation factor A protein 3 OS=Homo sapiens OX=9606 GN=TCEA3 PE=1 SV=2	1	0	5.76018	6.27884	10.7605	10.2895	11.7326	17.7797	10.6433	14.5825	5.9745	6.19853	0	0	0	0	0	0	0
sp|O75781|PALM_HUMAN	O75781	8.68192	10.8589	9.86558	10.1866	15.2332	7.19918	9.5153	6.90625	7.41459	11.4851	10.5912	7.1332	9.67354	11.1061	10.8184	25.1489	18.4142	6.57695	6.25806	6.08636	9.47221	10.0185	1.05767	0.729525	0.812659		sp|O75781|PALM_HUMAN	PALM	Paralemmin-1 OS=Homo sapiens OX=9606 GN=PALM PE=1 SV=2	11	7	7.97772	10.3512	9.58681	9.6559	14.7424	10.3351	7.1332	9.4442	10.4146	10.3589	6.68057	8.61913	6.44951	6.75347	10.2034	25.06	17.9585
sp|O75792|RNH2A_HUMAN	O75792	9.62844	8.67017	10.79	8.50146	7.48516	8.04428	9.96425	10.4226	9.3276	10.7292	13.9758	12.0289	10.7629	9.56127	12.4903	17.1704	12.7708	10.7146	6.82086	9.53659	9.29083	11.2689	1.21291	0.0422928	0.106906	3	sp|O75792|RNH2A_HUMAN	RNASEH2A	Ribonuclease H2 subunit A OS=Homo sapiens OX=9606 GN=RNASEH2A PE=1 SV=2	2	1	8.84746	8.26483	10.4851	8.05852	7.24401	13.6378	12.0289	10.5077	8.96593	11.9598	7.46479	9.0258	9.73328	8.49591	9.53186	17.1097	12.4548
sp|O75794|CD123_HUMAN	O75794	7.67274	10.1844	13.283	9.52461	8.72517						12.7569	12.063	8.23545	10.9451	10.4916						9.7087	10.7793	1.11027	0.405083	0.540846		sp|O75794|CD123_HUMAN	CDC123	Cell division cycle protein 123 homolog OS=Homo sapiens OX=9606 GN=CDC123 PE=1 SV=1	1	0	7.05039	9.70829	12.9077	9.02836	8.44407	12.4484	12.063	8.0402	10.2636	10.046	0	0	0	0	0	0	0
sp|O75817|POP7_HUMAN	O75817	10.7535	11.1439	12.6186	10.0363	9.58141	6.83105	8.90789	8.9179	5.13788	7.96959	10.442	8.92825	9.88667	11.5985	9.19169	22.6557	13.2155	12.8949	7.6334	10.515	8.93171	11.1779	1.25148	0.0912373	0.18758		sp|O75817|POP7_HUMAN	POP7	Ribonuclease P protein subunit p20 OS=Homo sapiens OX=9606 GN=POP7 PE=1 SV=2	2	1	9.8813	10.6229	12.262	9.51344	9.27272	10.1895	8.92825	9.65227	10.8763	8.80129	6.33896	8.06893	8.32812	4.67976	7.08019	22.5756	12.8885
sp|O75821|EIF3G_HUMAN	O75821	7.88619	9.18623	10.7862	7.90766	8.7788	9.27114	9.20232	9.93727	9.30224	8.70627	11.7967	12.8802	13.1507	10.7791	10.6372	11.1345	11.5129	13.5162	11.2624	11.695	9.05956	11.7988	1.30236	3.33382e-06	0.000275584	4	sp|O75821|EIF3G_HUMAN	EIF3G	Eukaryotic translation initiation factor 3 subunit G OS=Homo sapiens OX=9606 GN=EIF3G PE=1 SV=2	17	19	7.24653	8.75676	10.4814	7.49566	8.49597	11.5114	12.8802	12.8389	10.1079	10.1854	8.60327	8.33563	9.28008	8.47281	7.73466	11.0951	11.228
sp|O75822|EIF3J_HUMAN	O75822	9.40762	9.41348	10.4673	9.36857	9.64735	7.67835	10.092	9.84617	9.69778	11.3886	11.6209	10.9896	11.2145	12.5259	9.36735	13.2394	12.7539	10.0413	10.1646	10.8281	9.65783	11.2108	1.1608	0.00576275	0.0270863		sp|O75822|EIF3J_HUMAN	EIF3J	Eukaryotic translation initiation factor 3 subunit J OS=Homo sapiens OX=9606 GN=EIF3J PE=1 SV=2	22	17	8.64455	8.97338	10.1715	8.88045	9.33654	11.3399	10.9896	10.9486	11.746	8.96949	7.12522	9.14149	9.195	8.83308	10.1176	13.1926	12.4383
sp|O75828|CBR3_HUMAN	O75828	8.66521	8.23763	8.72462	8.50844	10.2526	9.49389	11.5659	10.8555	9.89339	10.9852	11.4953	10.5142	11.3037	10.8905	15.3938	13.86	10.4005	12.5275	7.79181	8.44889	9.65481	11.0536	1.14488	0.0881581	0.183432		sp|O75828|CBR3_HUMAN	CBR3	Carbonyl reductase [NADPH] 3 OS=Homo sapiens OX=9606 GN=CBR3 PE=1 SV=3	12	12	7.96236	7.85251	8.47809	8.06514	9.92229	11.2173	10.5142	11.0357	10.2124	14.74	8.80997	10.4766	10.1376	9.01125	9.75926	13.811	10.1431
sp|O75829|CNMD_HUMAN	O75829	16.9073	12.3701	17.9388	12.9421	10.0415	19.1088	7.14465	9.62378	7.92247	7.61135	7.67251	6.39064	5.92121	7.28905	7.0608	10.7742	12.2835	10.2363	10.3297	10.6288	11.447	8.60367	1.33048	0.0583963	0.134904		sp|O75829|CNMD_HUMAN	CNMD	Leukocyte cell-derived chemotaxin 1 OS=Homo sapiens OX=9606 GN=CNMD PE=1 SV=1	3	2	15.5359	11.7918	17.4319	12.2678	9.71803	7.48697	6.39064	5.78083	6.83519	6.76091	17.7322	6.47175	8.98732	7.21607	6.76193	10.7361	11.9795
sp|O75832|PSD10_HUMAN	O75832	10.978	11.3822	9.43927	13.1188	12.0529	4.47865	4.90218	8.01876	7.92293	8.80483	5.19798	5.22868	6.04318	15.7695	15.458	10.3867	16.271	13.8416	14.6303	15.7322	8.62964	10.7984	1.25131	0.251289	0.38748		sp|O75832|PSD10_HUMAN	PSMD10	26S proteasome non-ATPase regulatory subunit 10 OS=Homo sapiens OX=9606 GN=PSMD10 PE=1 SV=1	9	16	10.0876	10.8501	9.17255	12.4353	11.6646	5.07228	5.22868	5.89991	14.7876	14.8015	4.15602	4.44048	7.48845	7.21649	7.82222	10.35	15.8684
sp|O75843|AP1G2_HUMAN	O75843	9.79829	10.6344	10.6697	7.74373	7.18657	10.8667	10.8093	16.2368	13.6605	7.32451	8.93391	15.2631	10.9956	11.2223	11.4424	4.07081	5.37801	10.5745	13.3697	14.1329	10.1675	9.82973	1.03436	0.846904	0.900294		sp|O75843|AP1G2_HUMAN	AP1G2	AP-1 complex subunit gamma-like 2 OS=Homo sapiens OX=9606 GN=AP1G2 PE=1 SV=1	2	2	9.00354	10.1372	10.3682	7.34027	6.95504	8.71786	15.2631	10.7349	10.5235	10.9564	10.0839	9.79127	15.163	12.4425	6.5071	4.05642	5.24493
sp|O75844|FACE1_HUMAN	O75844	10.8544	11.0496	11.0717	10.9464	10.0694	12.2108	12.0447	11.9043	12.0831	11.914	10.2075	10.6022	9.46331	10.4692	9.3928	7.98101	8.84721	9.71777	9.79161	9.98065	11.3944	9.61504	1.18506	7.74454e-05	0.00166376		sp|O75844|FACE1_HUMAN	ZMPSTE24	CAAX prenyl protease 1 homolog OS=Homo sapiens OX=9606 GN=ZMPSTE24 PE=1 SV=2	15	16	9.97401	10.533	10.7589	10.3761	9.745	9.96066	10.6022	9.23895	9.81728	8.99386	11.3312	10.9103	11.117	11.0057	10.5844	7.95279	8.62829
sp|O75845|SC5D_HUMAN	O75845	11.822	12.6598	11.4701	13.0924	8.70928	17.7105	12.5881	10.0416	11.2484	9.66244	7.8689	8.85376	8.95335	11.1125	9.80649	8.59706	7.20602	11.5959	8.57467	9.15561	11.6892	9.08575	1.28654	0.00427225	0.0218266	2	sp|O75845|SC5D_HUMAN	SC5D	Lathosterol oxidase OS=Homo sapiens OX=9606 GN=SC5D PE=1 SV=2	1	2	10.8631	12.0679	11.146	12.4103	8.42869	7.67861	8.85376	8.74108	10.4206	9.38998	16.4347	11.4025	9.37751	10.2454	8.58412	8.56667	7.02771
sp|O75864|PPR37_HUMAN	O75864	1.9076	3.76451	3.92506	3.89646	2.65493						11.4272	3.78597	33.6532	3.61543	34.8806						3.11138	11.2922	3.62931	0.0393109	0.101645		sp|O75864|PPR37_HUMAN	PPP1R37	Protein phosphatase 1 regulatory subunit 37 OS=Homo sapiens OX=9606 GN=PPP1R37 PE=1 SV=4	1	0	1.75287	3.58851	3.81415	3.69345	2.5694	11.1509	3.78597	32.8553	3.39031	33.3991	0	0	0	0	0	0	0
sp|O75865|TPC6A_HUMAN	O75865	7.09175	7.35256	9.4037	7.11053	7.24131	9.41673	8.02728	10.8179	10.1482	8.64971	13.4847	18.4901	18.0291	7.32008	7.80545	13.0103	10.1877	11.7632	11.5779	11.9353	8.42988	11.8659	1.4076	0.00541537	0.0260493	4	sp|O75865|TPC6A_HUMAN	TRAPPC6A	Trafficking protein particle complex subunit 6A OS=Homo sapiens OX=9606 GN=TRAPPC6A PE=1 SV=2	1	4	6.51653	7.00882	9.13799	6.74006	7.00801	13.1586	18.4901	17.6017	6.86429	7.47393	8.73837	7.27126	10.1025	9.24332	7.68441	12.9643	9.93558
sp|O75874|IDHC_HUMAN	O75874	8.42502	8.19516	8.24097	8.55388	7.76167	6.90771	9.35899	10.0639	10.5569	11.0656	12.1757	13.6437	12.8282	12.5726	11.4665	6.82205	10.5209	16.2181	11.1812	13.1376	8.82686	11.8044	1.33732	0.0030668	0.0174704	4	sp|O75874|IDHC_HUMAN	IDH1	Isocitrate dehydrogenase [NADP] cytoplasmic OS=Homo sapiens OX=9606 GN=IDH1 PE=1 SV=2	74	74	7.74165	7.81202	8.00811	8.10821	7.51161	11.8813	13.6437	12.5241	11.7898	10.9795	6.41009	8.47754	9.3983	9.6156	9.83066	6.79793	10.2606
sp|O75879|GATB_HUMAN	O75879	10.196	9.9422	11.187	9.15929	10.6595	9.81427	7.98574	8.86932	7.96737	7.73847	11.1521	10.6119	9.79398	9.03864	12.2739	20.0737	11.0003	11.1859	10.6375	9.76389	9.28167	11.2677	1.21398	0.0282852	0.0801956	3	sp|O75879|GATB_HUMAN	GATB	Glutamyl-tRNA(Gln) amidotransferase subunit B, mitochondrial OS=Homo sapiens OX=9606 GN=GATB PE=1 SV=1	2	1	9.369	9.47739	10.8709	8.68208	10.3161	10.8824	10.6119	9.56178	8.47584	11.7526	9.10727	7.23363	8.28276	7.25696	6.87486	20.0027	10.7281
sp|O75880|SCO1_HUMAN	O75880	14.2121	12.9058	11.4511	12.8116	10.762	16.7414	13.1875	10.0543	10.637	9.21109	7.34532	8.25681	7.88444	9.76715	9.05503	8.44325	7.00337	10.8502	10.3836	9.8406	12.0205	8.79605	1.36658	0.000485537	0.00494934	2	sp|O75880|SCO1_HUMAN	SCO1	Protein SCO1 homolog, mitochondrial OS=Homo sapiens OX=9606 GN=SCO1 PE=1 SV=1	5	8	13.0593	12.3024	11.1275	12.1441	10.4153	7.16769	8.25681	7.69751	9.15899	8.67044	15.5354	11.9455	9.38934	9.68852	8.18314	8.4134	6.83007
sp|O75881|CP7B1_HUMAN	O75881	10.1726	10.5499	10.3977	10.604	10.5143	11.051	10.0636	12.321	14.3871	9.47632	10.0529	9.55681	9.35389	11.4842	11.4848	9.16786	8.73422	10.162	10.1592	10.6992	10.88	10.0473	1.08288	0.112097	0.216479		sp|O75881|CP7B1_HUMAN	CYP7B1	Cytochrome P450 7B1 OS=Homo sapiens OX=9606 GN=CYP7B1 PE=1 SV=2	7	2	9.34749	10.0567	10.1039	10.0515	10.1756	9.8098	9.55681	9.13212	10.7691	10.997	10.2549	9.11579	11.5062	13.1043	8.41877	9.13545	8.51809
sp|O75882|ATRN_HUMAN	O75882	9.91696	9.55565	10.9167	9.90581	11.9958						11.8517	9.23255	11.0768	9.31416	10.2611						10.4215	10.2984	1.01195	0.857923	0.9082		sp|O75882|ATRN_HUMAN	ATRN	Attractin OS=Homo sapiens OX=9606 GN=ATRN PE=1 SV=2	1	0	9.11258	9.10891	10.6082	9.3897	11.6093	11.5651	9.23255	10.8142	8.73421	9.82525	0	0	0	0	0	0	0
sp|O75884|RBBP9_HUMAN	O75884	10.1334	9.20524	9.29031	10.5924	12.4871	7.52984	9.74438	12.4879	11.4683	12.218	9.63903	9.40807	8.68486	12.2536	12.5083	9.017	9.40706	11.4335	10.9447	11.8659	10.3939	10.4279	1.00326	0.963991	0.976315		sp|O75884|RBBP9_HUMAN	RBBP9	Serine hydrolase RBBP9 OS=Homo sapiens OX=9606 GN=RBBP9 PE=1 SV=2	11	9	9.31148	8.77488	9.0278	10.0405	12.0848	9.40593	9.40807	8.47896	11.4906	11.977	6.98741	8.82664	11.662	10.4457	10.8545	8.98512	9.17428
sp|O75886|STAM2_HUMAN	O75886	7.36966	7.82819	8.47939	7.93166	7.89768	7.82196	11.8312	9.24197	8.54365	9.58291	15.4953	13.3085	14.802	11.619	8.96975	14.1745	13.6182	11.4782	9.27992	9.96226	8.57351	12.0615	1.40683	0.000305651	0.0036599	3	sp|O75886|STAM2_HUMAN	STAM2	Signal transducing adapter molecule 2 OS=Homo sapiens OX=9606 GN=STAM2 PE=1 SV=1	7	4	6.7719	7.46221	8.23979	7.51841	7.64324	15.1206	13.3085	14.4511	10.8955	8.58878	7.25848	10.7169	8.63076	7.78186	8.51347	14.1244	13.2812
sp|O75891|AL1L1_HUMAN	O75891						6.19035	6.31465	5.74991	6.23462	19.5032						14.5187	13.9274	8.9242	11.5181	12.8711	7.71487	12.1751	1.57814	0.10761	0.209678		sp|O75891|AL1L1_HUMAN	ALDH1L1	Cytosolic 10-formyltetrahydrofolate dehydrogenase OS=Homo sapiens OX=9606 GN=ALDH1L1 PE=1 SV=2	0	2	0	0	0	0	0	0	0	0	0	0	5.74441	5.71992	5.36965	5.67871	17.3267	14.4674	13.5828
sp|O75909|CCNK_HUMAN	O75909	12.692	11.1851	13.2468	11.4134	12.1165	6.68116	5.70551	7.76271	6.16728	7.3298	7.22797	8.88377	7.06563	9.59223	10.8906	24.3583	15.4128	11.0322	10.1965	9.77299	8.99791	10.694	1.1885	0.281073	0.417825		sp|O75909|CCNK_HUMAN	CCNK	Cyclin-K OS=Homo sapiens OX=9606 GN=CCNK PE=1 SV=2	2	2	11.6625	10.6622	12.8725	10.8187	11.7261	7.05318	8.88377	6.89812	8.99496	10.428	6.19986	5.16815	7.24933	5.61738	6.5118	24.2722	15.0314
sp|O75911|DHRS3_HUMAN	O75911	12.4874	9.32293	9.55085	10.3456	6.37287	7.03976	8.62841	13.6185	13.2762	7.29544	8.54882	16.6584	12.9618	10.8314	6.86295	6.19593	7.9296	15.3819	13.3051	13.1733	9.48178	10.6157	1.11959	0.423055	0.557307		sp|O75911|DHRS3_HUMAN	DHRS3	Short-chain dehydrogenase/reductase 3 OS=Homo sapiens OX=9606 GN=DHRS3 PE=1 SV=2	17	22	11.4745	8.88707	9.28098	9.80659	6.16755	8.34208	16.6584	12.6545	10.157	6.57146	6.53263	7.81577	12.7179	12.0924	6.48128	6.17402	7.73338
sp|O75915|PRAF3_HUMAN	O75915	11.0988	10.7891	10.9956	11.2635	10.5401	11.4406	10.673	10.5314	10.9453	11.5148	9.80677	8.81106	9.38423	9.71791	11.8005	10.7545	11.1179	9.37599	9.64294	10.1165	10.9741	10.0168	1.09557	0.00676328	0.0299995		sp|O75915|PRAF3_HUMAN	ARL6IP5	PRA1 family protein 3 OS=Homo sapiens OX=9606 GN=ARL6IP5 PE=1 SV=1	22	20	10.1986	10.2847	10.6849	10.6767	10.2005	9.56961	8.81106	9.16175	9.11282	11.2993	10.6164	9.6678	9.83493	9.96936	10.2298	10.7165	10.8428
sp|O75923|DYSF_HUMAN	O75923	16.1322	10.9134	11.1442	10.7116	11.8557	9.9576	14.7086	8.15011	8.18417	9.6461	10.3341	8.00859	8.84758	7.61834	8.81643	10.8818	11.6491	9.52359	12.0532	11.1868	10.8911	9.78004	1.1136	0.227858	0.361164		sp|O75923|DYSF_HUMAN	DYSF	Dysferlin OS=Homo sapiens OX=9606 GN=DYSF PE=1 SV=1	18	6	14.8237	10.4032	10.8293	10.1535	11.4737	10.0842	8.00859	8.63782	7.14398	8.44197	9.24028	13.3233	7.61111	7.45443	8.5696	10.8433	11.3608
sp|O75934|SPF27_HUMAN	O75934	9.11735	13.8606	13.6213	12.9832	12.7803	12.6255	10.1304	11.5152	11.2616	10.7658	7.92864	9.15535	7.72566	8.54283	8.40927	10.0309	9.09606	9.99608	10.5769	10.1594	11.7695	9.11258	1.29157	0.000213923	0.00302394	1	sp|O75934|SPF27_HUMAN	BCAS2	Pre-mRNA-splicing factor SPF27 OS=Homo sapiens OX=9606 GN=BCAS2 PE=1 SV=1	10	7	8.37783	13.2126	13.2364	12.3068	12.3686	7.7369	9.15535	7.5425	8.0109	8.0521	11.716	9.17633	10.7537	10.2575	9.56432	9.9954	8.87098
sp|O75935|DCTN3_HUMAN	O75935	7.83546	9.10376	11.2264	9.24724	11.5051	9.27881	8.66963	8.43507	9.36334	8.69266	11.1042	11.1441	10.1197	11.8818	10.7688	8.94846	14.0153	10.8481	14.0726	13.2678	9.27383	11.507	1.2408	0.00198573	0.0129515	3	sp|O75935|DCTN3_HUMAN	DCTN3	Dynactin subunit 3 OS=Homo sapiens OX=9606 GN=DCTN3 PE=1 SV=1	10	12	7.19991	8.67814	10.9092	8.76545	11.1344	10.8357	11.1441	9.87973	11.142	10.3114	8.61039	7.85311	7.87723	8.52846	7.72257	8.91682	13.6685
sp|O75937|DNJC8_HUMAN	O75937	10.2906	10.165	9.41621	10.4684	10.459	8.43053	9.09651	11.1558	10.953	12.5092	10.3925	10.9419	10.5072	10.4544	10.981	8.39882	10.717	10.6914	11.9159	12.2255	10.2371	10.6757	1.04284	0.388184	0.526715		sp|O75937|DNJC8_HUMAN	DNAJC8	DnaJ homolog subfamily C member 8 OS=Homo sapiens OX=9606 GN=DNAJC8 PE=1 SV=2	9	7	9.45592	9.68976	9.15014	9.92298	10.122	10.1412	10.9419	10.2581	9.80343	10.5146	7.82321	8.23978	10.418	9.9764	11.1132	8.36913	10.4518
sp|O75940|SPF30_HUMAN	O75940	10.1818	10.788	12.056	10.8852	12.9712	14.1813	9.57575	8.93917	7.9312	9.58592	9.73963	9.01518	9.64519	9.22155	9.59827	12.0949	11.2234	12.5411	9.69185	9.90946	10.5607	10.2055	1.03481	0.6093	0.72056		sp|O75940|SPF30_HUMAN	SMNDC1	Survival of motor neuron-related-splicing factor 30 OS=Homo sapiens OX=9606 GN=SMNDC1 PE=1 SV=1	3	5	9.35593	10.2836	11.7153	10.3181	12.5533	9.5041	9.01518	9.41652	8.64736	9.1906	13.1597	8.67389	8.34799	7.22402	8.51614	12.0521	10.9457
sp|O75947|ATP5H_HUMAN	O75947	14.4353	11.5117	11.8279	12.0986	11.7572	10.649	7.90745	8.94883	8.91847	8.30738	8.05516	8.86004	8.07226	8.65749	9.08799	10.9756	9.46888	12.5875	13.8205	13.9284	10.4553	10.1332	1.03179	0.738639	0.820291		sp|O75947|ATP5H_HUMAN	ATP5PD	ATP synthase subunit d, mitochondrial OS=Homo sapiens OX=9606 GN=ATP5PD PE=1 SV=3	32	33	13.2644	10.9735	11.4937	11.4682	11.3784	7.86036	8.86004	7.88088	8.11842	8.702	9.8819	7.16271	8.35701	8.12326	7.38028	10.9368	9.23457
sp|O75954|TSN9_HUMAN	O75954	12.0242	11.2279	11.7569	12.0151	10.7592						9.14564	9.31823	8.12492	10.082	9.80903						11.546	9.27059	1.24544	0.000918675	0.0075858		sp|O75954|TSN9_HUMAN	TSPAN9	Tetraspanin-9 OS=Homo sapiens OX=9606 GN=TSPAN9 PE=1 SV=1	3	0	11.0489	10.703	11.4247	11.3891	10.4126	8.92447	9.31823	7.93229	9.45421	9.39241	0	0	0	0	0	0	0
sp|O75955|FLOT1_HUMAN	O75955	11.4523	11.585	11.7943	10.6802	10.5641	13.5222	14.0684	10.7763	11.8758	9.29507	8.72582	10.8263	9.81668	9.48175	9.19892	10.3602	9.13234	10.3801	8.24084	8.62578	11.4856	9.44452	1.21612	0.000652918	0.00603759	2	sp|O75955|FLOT1_HUMAN	FLOT1	Flotillin-1 OS=Homo sapiens OX=9606 GN=FLOT1 PE=1 SV=3	29	31	10.5234	11.0434	11.461	10.1237	10.2238	8.5148	10.8263	9.58394	8.89136	8.80821	12.5481	12.7434	10.0636	10.8169	8.25775	10.3236	8.90636
sp|O75962|TRIO_HUMAN	O75962	9.27672	11.5858	10.6077	11.5581	11.1513	8.81313	8.3724	8.25301	7.76961	8.4222	10.6475	8.45314	9.87946	9.08918	11.8683	16.3643	15.7248	10.6199	10.9153	9.87463	9.47888	11.0945	1.17044	0.0774668	0.166047		sp|O75962|TRIO_HUMAN	TRIO	Triple functional domain protein OS=Homo sapiens OX=9606 GN=TRIO PE=1 SV=2	4	4	8.52427	11.0441	10.308	10.9559	10.792	10.39	8.45314	9.64523	8.52323	11.3642	8.17825	7.58387	7.70721	7.07684	7.48229	16.3064	15.3357
sp|O75964|ATP5L_HUMAN	O75964	14.6283	13.1916	12.5737	13.4605	12.6405	10.2288	7.62628	9.91592	10.0879	8.98857	6.05271	7.45371	6.6051	8.83136	9.06739	7.73092	10.3787	11.9842	14.4888	14.3154	11.1218	9.28439	1.1979	0.142686	0.257383		sp|O75964|ATP5L_HUMAN	ATP5MG	ATP synthase subunit g, mitochondrial OS=Homo sapiens OX=9606 GN=ATP5MG PE=1 SV=3	13	19	13.4418	12.5749	12.2184	12.7592	12.2333	5.90634	7.45371	6.4485	8.28147	8.68227	9.49191	6.90802	9.26014	9.18838	7.98545	7.70359	10.1219
sp|O75970|MPDZ_HUMAN	O75970	11.1259	10.4882	11.2664	8.91849	9.70492	8.07301	8.62163	11.9186	11.6585	9.05264	9.09599	12.6104	10.8205	10.9472	9.05285	11.5653	8.7416	12.8478	11.2332	11.9993	9.99627	10.7973	1.08013	0.232562	0.367013		sp|O75970|MPDZ_HUMAN	MPDZ	Multiple PDZ domain protein OS=Homo sapiens OX=9606 GN=MPDZ PE=1 SV=2	22	28	10.2235	9.99789	10.9481	8.45382	9.39225	8.87602	12.6104	10.564	10.2656	8.66835	7.49145	7.80963	11.1304	10.619	8.04237	11.5244	8.52529
sp|O75973|C1QRF_HUMAN	O75973	8.18016	12.212	6.89918	12.8167	22.2858	11.1697	17.6146	9.31715	7.88537	12.9645	11.2613	7.32277	6.72542	5.965	10.3913	13.217	5.67827	8.77152	10.2636	9.54044	11.3944	8.60114	1.32476	0.0714668	0.15681		sp|O75973|C1QRF_HUMAN	C1QL1	C1q-related factor OS=Homo sapiens OX=9606 GN=C1QL1 PE=1 SV=1	1	1	7.51665	11.6411	6.70423	12.1489	21.5678	10.989	7.32277	6.56597	5.59358	9.94995	10.3651	15.9556	8.70097	7.18228	11.5177	13.1703	5.53776
sp|O75976|CBPD_HUMAN	O75976	12.287	11.5082	11.2666	11.7881	9.61775	12.1183	9.98694	10.5461	10.8149	9.978	9.10382	9.24495	8.97701	11.0369	9.469	10.4094	9.79592	11.0864	10.4015	10.8371	10.9542	10.0062	1.09474	0.0272823	0.0781476		sp|O75976|CBPD_HUMAN	CPD	Carboxypeptidase D OS=Homo sapiens OX=9606 GN=CPD PE=1 SV=2	14	10	11.2904	10.9702	10.9482	11.1739	9.30789	8.88366	9.24495	8.76418	10.3497	9.06682	11.2453	9.04635	9.84868	9.85058	8.86446	10.3726	9.55352
sp|O76003|GLRX3_HUMAN	O76003	9.22692	9.66469	10.0446	9.60186	8.65789	8.98209	11.2342	11.2212	11.2916	10.7288	11.346	12.3055	10.5311	11.597	11.0013	10.7397	11.4593	10.3947	10.1278	9.83378	10.0212	10.9104	1.08873	0.0386187	0.100409		sp|O76003|GLRX3_HUMAN	GLRX3	Glutaredoxin-3 OS=Homo sapiens OX=9606 GN=GLRX3 PE=1 SV=2	15	16	8.47851	9.21285	9.76073	9.10159	8.37896	11.0716	12.3055	10.2814	10.8749	10.534	8.33504	10.1761	10.4791	10.2848	9.53151	10.7017	11.1757
sp|O76021|RL1D1_HUMAN	O76021	10.1877	10.2643	9.99846	9.43011	10.6825	11.0583	9.90926	10.2986	9.76154	10.5725	10.9781	10.2443	12.0851	10.7388	9.43636	11.5482	11.5657	8.83578	12.0312	10.3242	10.2064	10.7278	1.05109	0.180615	0.306497		sp|O76021|RL1D1_HUMAN	RSL1D1	Ribosomal L1 domain-containing protein 1 OS=Homo sapiens OX=9606 GN=RSL1D1 PE=1 SV=3	9	8	9.36134	9.78442	9.71594	8.93879	10.3383	10.7126	10.2443	11.7986	10.0701	9.03557	10.2617	8.97599	9.61756	8.89116	9.39259	11.5074	11.2795
sp|O76024|WFS1_HUMAN	O76024	10.2348	11.0963	10.2261	11.5578	11.0655	13.2662	10.3869	12.8296	12.9886	11.0409	9.75975	9.75182	9.05148	9.80445	11.6025	7.43159	8.1922	9.49923	10.6081	10.2201	11.4178	9.52463	1.19876	0.00221447	0.0139912		sp|O76024|WFS1_HUMAN	WFS1	Wolframin OS=Homo sapiens OX=9606 GN=WFS1 PE=1 SV=2	30	20	9.40464	10.5775	9.93712	10.9556	10.709	9.52373	9.75182	8.83688	9.19397	11.1097	12.3105	9.40863	11.9811	11.8305	9.80875	7.40532	7.98949
sp|O76027|ANXA9_HUMAN	O76027	8.9572	9.98918	10.041	10.4105	14.162	5.98924	6.79727	10.3597	9.68839	11.5575	9.22712	7.21369	6.98846	9.03904	18.1711	11.5791	10.1931	9.47102	15.5698	14.4555	9.54167	10.6753	1.11881	0.388641	0.526772		sp|O76027|ANXA9_HUMAN	ANXA9	Annexin A9 OS=Homo sapiens OX=9606 GN=ANXA9 PE=1 SV=3	3	2	8.23067	9.52217	9.7573	9.86813	13.7057	9.00398	7.21369	6.82278	8.47622	17.3993	5.55779	6.15709	9.67456	8.82453	10.2677	11.5382	9.94089
sp|O76031|CLPX_HUMAN	O76031	11.7309	11.7048	11.7097	11.1178	10.6982	15.7988	12.0325	11.6901	11.9813	9.88324	9.10612	10.3179	9.74073	9.50306	8.52962	7.35293	7.23876	10.2751	10.1911	10.0258	11.7538	9.15706	1.28357	0.000352364	0.00402957	1	sp|O76031|CLPX_HUMAN	CLPX	ATP-dependent Clp protease ATP-binding subunit clpX-like, mitochondrial OS=Homo sapiens OX=9606 GN=CLPX PE=1 SV=2	11	15	10.7794	11.1576	11.3788	10.5385	10.3535	8.88591	10.3179	9.50979	8.91134	8.16734	14.6607	10.8993	10.917	10.913	8.78028	7.32693	7.05964
sp|O76041|NEBL_HUMAN	O76041	11.265	9.25898	11.358	9.08727	16.3179	7.08468	7.70529	8.59371	8.41521	9.42531	9.17058	9.07323	7.648	9.86866	11.1084	19.4722	12.0592	11.7869	10.1032	10.4162	9.58373	10.7347	1.1201	0.314008	0.453222		sp|O76041|NEBL_HUMAN	NEBL	Nebulette OS=Homo sapiens OX=9606 GN=NEBL PE=1 SV=1	2	1	10.3513	8.82611	11.0371	8.61381	15.7922	8.94881	9.07323	7.46668	9.25418	10.6366	6.57432	6.97959	8.02537	7.66487	8.37345	19.4034	11.7608
sp|O76054|S14L2_HUMAN	O76054	8.25172	7.92888	7.34888	8.19314	5.48709	6.91828	9.38469	13.7146	16.5799	8.10525	11.2752	16.8765	15.1408	14.5591	8.6976	8.1371	7.30854	10.9082	12.4839	12.6106	8.73518	11.4057	1.30572	0.064685	0.145584		sp|O76054|S14L2_HUMAN	SEC14L2	SEC14-like protein 2 OS=Homo sapiens OX=9606 GN=SEC14L2 PE=1 SV=1	18	23	7.58241	7.55819	7.14123	7.76627	5.31031	11.0025	16.8765	14.7818	13.6526	8.32819	6.4199	8.50082	12.8076	15.1016	7.20071	8.10833	7.12769
sp|O76062|ERG24_HUMAN	O76062	12.1569	12.5985	12.0701	12.8363	10.4498	9.90323	8.008	9.44056	8.93623	8.62555	9.10853	9.66508	8.56257	8.71782	8.06471	15.7639	13.3919	11.357	9.12758	10.7355	10.3649	10.2216	1.01401	0.877749	0.920475		sp|O76062|ERG24_HUMAN	TM7SF2	Delta(14)-sterol reductase TM7SF2 OS=Homo sapiens OX=9606 GN=TM7SF2 PE=1 SV=3	3	1	11.1708	12.0095	11.729	12.1675	10.1131	8.88826	9.66508	8.35957	8.175	7.72218	9.18982	7.25379	8.81622	8.13944	7.66295	15.7082	13.0605
sp|O76070|SYUG_HUMAN	O76070						4.98873	5.19151	7.20272	8.03152	14.1839						10.7689	17.6031	11.7488	14.3731	11.3179	7.33626	12.9364	1.76335	0.0269632	0.0775257		sp|O76070|SYUG_HUMAN	SNCG	Gamma-synuclein OS=Homo sapiens OX=9606 GN=SNCG PE=1 SV=2	0	1	0	0	0	0	0	0	0	0	0	0	4.62935	4.70256	6.72638	7.31539	12.601	10.7308	17.1675
sp|O76071|CIAO1_HUMAN	O76071	10.0868	8.45448	9.49855	9.80586	8.64865	9.94855	10.1854	12.7529	11.363	11.5417	9.85577	11.0473	12.1234	11.1356	13.4034	9.93888	9.109	11.0483	10.2664	9.99144	10.1532	10.7291	1.05672	0.320117	0.458913		sp|O76071|CIAO1_HUMAN	CIAO1	Probable cytosolic iron-sulfur protein assembly protein CIAO1 OS=Homo sapiens OX=9606 GN=CIAO1 PE=1 SV=1	6	5	9.26869	8.05922	9.23016	9.29496	8.37001	9.61743	11.0473	11.836	10.4422	12.8341	9.23188	9.22609	11.9095	10.3498	10.2537	9.90374	8.8836
sp|O76075|DFFB_HUMAN	O76075	14.6055	10.1465	10.2206	12.2735	8.51927						10.4234	9.72976	6.98245	11.4132	10.1052						10.9632	9.60315	1.14162	0.317948	0.457434		sp|O76075|DFFB_HUMAN	DFFB	DNA fragmentation factor subunit beta OS=Homo sapiens OX=9606 GN=DFFB PE=1 SV=1	1	0	13.4208	9.67212	9.93184	11.634	8.2448	10.1713	9.72976	6.81691	10.7025	9.67598	0	0	0	0	0	0	0
sp|O76090|BEST1_HUMAN	O76090	9.09194	9.64209	9.60051	9.29337	8.08691	8.40503	10.9423	16.199	15.4746	7.583	10.0944	15.8741	13.2132	9.37205	9.47931	5.85149	5.58143	9.19797	13.2945	13.8915	10.1011	10.0427	1.00581	0.97556	0.983767		sp|O76090|BEST1_HUMAN	BEST1	Bestrophin-1 OS=Homo sapiens OX=9606 GN=BEST1 PE=1 SV=1	6	8	8.35448	9.19131	9.32923	8.80917	7.82637	9.85024	15.8741	12.8999	8.78849	9.0767	7.79955	9.91173	15.1277	14.0948	6.73674	5.8308	5.44332
sp|O76094|SRP72_HUMAN	O76094	10.5133	11.1755	11.9879	11.4466	11.7084	9.78304	11.3134	11.4846	11.2631	12.071	9.47723	9.65706	9.34787	10.4865	8.34536	7.71195	10.7378	8.59803	11.9493	11.417	11.2551	9.68654	1.16194	0.00642195	0.0289673		sp|O76094|SRP72_HUMAN	SRP72	Signal recognition particle subunit SRP72 OS=Homo sapiens OX=9606 GN=SRP72 PE=1 SV=3	22	21	9.66056	10.653	11.6492	10.8502	11.3312	9.24804	9.65706	9.12625	9.83358	7.99091	9.07829	10.2479	10.7251	10.2588	10.7239	7.68468	10.4721
sp|O94760|DDAH1_HUMAN	O94760	9.84362	9.63062	10.1069	10.0752	11.8955	9.33889	8.66433	10.0696	10.1855	8.33941	10.1966	11.7562	10.2108	11.0537	9.24283	16.3017	8.64971	10.6236	11.6415	11.6373	9.77288	10.9761	1.12311	0.0797441	0.170018		sp|O94760|DDAH1_HUMAN	DDAH1	N(G),N(G)-dimethylarginine dimethylaminohydrolase 1 OS=Homo sapiens OX=9606 GN=DDAH1 PE=1 SV=3	42	40	9.04519	9.18037	9.82129	9.55029	11.5123	9.94998	11.7562	9.96874	10.3654	8.85026	8.66614	7.84831	9.40365	9.27735	7.40874	16.2441	8.43567
sp|O94762|RECQ5_HUMAN	O94762	9.27783	9.03493	11.1908	8.58298	8.76243	6.12233	6.72871	8.13227	7.59983	6.48663	12.2572	10.9558	12.364	8.69223	12.7758	16.414	22.2413	9.87844	10.8899	10.2095	8.06562	12.2146	1.51441	0.000911434	0.00754239	3	sp|O94762|RECQ5_HUMAN	RECQL5	ATP-dependent DNA helicase Q5 OS=Homo sapiens OX=9606 GN=RECQL5 PE=1 SV=2	2	4	8.52529	8.61253	10.8746	8.13579	8.48013	11.9608	10.9558	12.0709	8.151	12.2332	5.68129	6.09499	7.59445	6.9222	5.76273	16.356	21.6909
sp|O94763|RMP_HUMAN	O94763	9.07389	9.27239	12.4858	9.58393	9.34632						11.3138	11.2405	11.3005	8.13438	12.1346						9.87909	10.7243	1.08555	0.397428	0.534661		sp|O94763|RMP_HUMAN	URI1	Unconventional prefoldin RPB5 interactor 1 OS=Homo sapiens OX=9606 GN=URI1 PE=1 SV=3	1	0	8.33789	8.83889	12.133	9.08459	9.04521	11.0402	11.2405	11.0326	7.62789	11.6192	0	0	0	0	0	0	0
sp|O94766|B3GA3_HUMAN	O94766	19.8187	11.0188	10.6936	11.2404	11.437	10.0231	8.0423	11.3284	9.96238	10.9382	6.05131	9.74037	7.02905	10.4651	7.15288	14.2886	10.4694	10.5555	10.2956	9.79248	11.1565	9.31854	1.19724	0.112579	0.21718		sp|O94766|B3GA3_HUMAN	B3GAT3	Galactosylgalactosylxylosylprotein 3-beta-glucuronosyltransferase 3 OS=Homo sapiens OX=9606 GN=B3GAT3 PE=1 SV=2	4	6	18.2112	10.5037	10.3914	10.6548	11.0685	5.90497	9.74037	6.8624	9.81351	6.84908	9.30105	7.28486	10.5792	9.07409	9.71752	14.2381	10.2103
sp|O94776|MTA2_HUMAN	O94776	10.9503	12.863	10.2238	11.3611	11.5946	12.3782	11.7335	11.8047	11.0515	11.0416	9.217	9.54495	8.68262	9.77375	9.99461	9.69537	9.30889	9.90384	9.64915	9.69787	11.478	9.53954	1.2032	5.7251e-07	0.000104562	1	sp|O94776|MTA2_HUMAN	MTA2	Metastasis-associated protein MTA2 OS=Homo sapiens OX=9606 GN=MTA2 PE=1 SV=1	17	13	10.0621	12.2616	9.93496	10.7692	11.2211	8.99411	9.54495	8.47677	9.16518	9.57011	11.4865	10.6284	11.024	10.0661	9.80935	9.66109	9.07854
sp|O94788|AL1A2_HUMAN	O94788	8.14261	10.3654	9.66298	9.57057	8.93931	11.0093	10.896	9.20687	8.93276	8.15365	10.8431	12.7099	11.9476	9.99302	11.6947	6.54109	21.8962	9.05768	10.5029	9.52308	9.43883	10.9582	1.16097	0.161355	0.282482		sp|O94788|AL1A2_HUMAN	ALDH1A2	Retinal dehydrogenase 2 OS=Homo sapiens OX=9606 GN=ALDH1A2 PE=1 SV=3	7	13	7.48215	9.8808	9.38994	9.07193	8.65131	10.5809	12.7099	11.6643	9.3708	11.198	10.2162	9.86983	8.59798	8.13628	7.24371	6.51796	21.3544
sp|O94804|STK10_HUMAN	O94804	7.21694	8.826	7.6742	8.33909	9.62606						11.7206	13.0439	11.1526	15.9538	10.3887						8.2936	12.3093	1.48419	0.00242124	0.0148976		sp|O94804|STK10_HUMAN	STK10	Serine/threonine-protein kinase 10 OS=Homo sapiens OX=9606 GN=STK10 PE=1 SV=1	2	0	6.63156	8.41337	7.45735	7.90461	9.31593	11.4372	13.0439	10.8882	14.9604	9.94747	0	0	0	0	0	0	0
sp|O94806|KPCD3_HUMAN	O94806	11.7274	10.4582	12.0091	10.2343	11.2178	7.52908	8.8897	12.0612	12.4505	8.84397	7.75503	7.41326	9.04599	12.4076	12.0937	12.3122	9.67492	10.2504	11.8721	11.8731	10.4159	10.2994	1.01132	0.893089	0.92896		sp|O94806|KPCD3_HUMAN	PRKD3	Serine/threonine-protein kinase D3 OS=Homo sapiens OX=9606 GN=PRKD3 PE=1 SV=1	1	2	10.7762	9.96923	11.6698	9.70105	10.8564	7.56749	7.41326	8.83152	11.635	11.58	6.9867	8.05245	11.2635	11.3404	7.85699	12.2687	9.43552
sp|O94808|GFPT2_HUMAN	O94808						9.4839	10.6819	9.19298	10.5879	9.70088						11.1133	12.7781	12.3025	10.796	9.11475	9.91156	11.1445	1.1244	0.114528	0.219518		sp|O94808|GFPT2_HUMAN	GFPT2	Glutamine--fructose-6-phosphate aminotransferase [isomerizing] 2 OS=Homo sapiens OX=9606 GN=GFPT2 PE=1 SV=3	0	1	0	0	0	0	0	0	0	0	0	0	8.8007	9.67583	8.58501	9.6438	8.61827	11.074	12.4619
sp|O94811|TPPP_HUMAN	O94811	9.56724	8.41822	8.03024	8.48131	7.47043	5.04873	7.50758	11.2408	9.99195	6.93315	9.88417	14.7228	14.8041	12.3641	10.1265	29.9947	4.72427	6.31546	11.2605	11.7848	8.09581	11.2346	1.38771	0.07121	0.156388		sp|O94811|TPPP_HUMAN	TPPP	Tubulin polymerization-promoting protein OS=Homo sapiens OX=9606 GN=TPPP PE=1 SV=1	1	1	8.79123	8.02465	7.80333	8.03942	7.22975	9.64514	14.7228	14.4531	11.5942	9.69635	4.68503	6.8005	10.4974	9.10102	6.15942	29.8887	4.60737
sp|O94813|SLIT2_HUMAN	O94813	13.2636	9.65786	10.2129	8.7914	10.3983	6.31263	5.33658	6.29104	5.27451	6.18036	9.19697	11.6249	10.5961	10.1933	10.2159	25.12	19.3132	12.1651	8.10475	9.99114	7.79311	11.8881	1.52546	0.0120916	0.0442525	3	sp|O94813|SLIT2_HUMAN	SLIT2	Slit homolog 2 protein OS=Homo sapiens OX=9606 GN=SLIT2 PE=1 SV=1	2	3	12.1878	9.20634	9.92436	8.33336	10.0633	8.97456	11.6249	10.3449	9.55856	9.78199	5.85788	4.83397	5.87499	4.80421	5.49064	25.0312	18.8353
sp|O94817|ATG12_HUMAN	O94817	9.74262	8.52628	8.84777	8.88074	7.71638	7.90472	11.1968	11.9998	12.1929	10.6982	11.7131	15.2066	12.4325	11.8955	8.88486	9.9745	8.19895	11.7238	10.1745	12.0305	9.64651	11.0632	1.14686	0.0948562	0.19278		sp|O94817|ATG12_HUMAN	ATG12	Ubiquitin-like protein ATG12 OS=Homo sapiens OX=9606 GN=ATG12 PE=1 SV=1	2	3	8.95238	8.12766	8.59776	8.41804	7.46778	11.4298	15.2066	12.1377	11.1548	8.50749	7.33528	10.1423	11.2062	11.1057	9.50425	9.93924	7.99607
sp|O94818|NOL4_HUMAN	O94818						2.87203	9.43728	9.93276	7.21984	9.18403						25.1317	19.1614	7.39335	6.85166	7.54792	7.0849	11.2985	1.59474	0.229722	0.363434		sp|O94818|NOL4_HUMAN	NOL4	Nucleolar protein 4 OS=Homo sapiens OX=9606 GN=NOL4 PE=1 SV=2	0	1	0	0	0	0	0	0	0	0	0	0	2.66514	8.54846	9.27587	6.57609	8.1591	25.0428	18.6873
sp|O94819|KBTBB_HUMAN	O94819	10.5704	10.9754	10.5989	11.9237	10.3743	8.93157	9.88089	10.0042	10.3247	10.6516	9.39984	9.85026	10.2217	9.59587	10.6339	10.4435	17.0668	10.0159	9.22276	9.23078	10.3976	10.3912	1.00062	0.998379	0.998642		sp|O94819|KBTBB_HUMAN	KBTBD11	Kelch repeat and BTB domain-containing protein 11 OS=Homo sapiens OX=9606 GN=KBTBD11 PE=1 SV=1	11	13	9.71301	10.4623	10.2994	11.3025	10.0401	9.17252	9.85026	9.97932	8.99837	10.1822	8.28816	8.95029	9.34256	9.40411	9.46285	10.4066	16.6445
sp|O94822|LTN1_HUMAN	O94822	9.85165	10.2505	10.4344	10.2789	10.8162	10.0867	11.8745	10.8731	11.0376	10.6017	9.9925	11.459	9.31432	10.5176	11.1323	10.6963	10.4021	9.10811	10.9911	10.4362	10.5967	10.3797	1.02091	0.483815	0.61283		sp|O94822|LTN1_HUMAN	LTN1	E3 ubiquitin-protein ligase listerin OS=Homo sapiens OX=9606 GN=LTN1 PE=1 SV=6	4	7	9.05257	9.77131	10.1396	9.74333	10.4677	9.75085	11.459	9.09349	9.86275	10.6595	9.36009	10.7561	10.154	10.0534	9.41855	10.6585	10.1447
sp|O94826|TOM70_HUMAN	O94826	10.7512	10.9157	10.9784	11.106	10.8227	13.9667	11.3126	10.0025	10.2768	10.5967	9.80906	9.55237	9.40084	8.61408	12.1835	8.11237	9.7484	11.1931	10.7951	10.1964	11.0299	9.89599	1.11459	0.0352278	0.0940357		sp|O94826|TOM70_HUMAN	TOMM70	Mitochondrial import receptor subunit TOM70 OS=Homo sapiens OX=9606 GN=TOMM70 PE=1 SV=1	33	27	9.87913	10.4054	10.6682	10.5274	10.474	9.57185	9.55237	9.17796	8.07772	11.666	12.9606	10.2472	9.34095	9.3605	9.41408	8.08369	9.50718
sp|O94827|PKHG5_HUMAN	O94827	10.3931	11.0684	11.8088	9.76065	10.2441						10.4975	10.0427	9.87877	9.97929	10.4112						10.6316	10.1589	1.04652	0.232008	0.36629		sp|O94827|PKHG5_HUMAN	PLEKHG5	Pleckstrin homology domain-containing family G member 5 OS=Homo sapiens OX=9606 GN=PLEKHG5 PE=1 SV=3	2	0	9.5501	10.5509	11.4751	9.25211	9.91404	10.2436	10.0427	9.64456	9.35792	9.96905	0	0	0	0	0	0	0
sp|O94829|IPO13_HUMAN	O94829	12.1338	10.3346	9.84753	11.5206	11.0606	6.43937	9.94465	9.74914	9.8861	8.70312	8.91009	9.98807	9.21055	10.4588	10.7804	14.9415	11.7217	12.6914	9.94046	11.36	9.83326	10.8779	1.10623	0.190615	0.318645		sp|O94829|IPO13_HUMAN	IPO13	Importin-13 OS=Homo sapiens OX=9606 GN=IPO13 PE=1 SV=3	4	4	11.1496	9.85146	9.56927	10.9204	10.7043	8.69462	9.98807	8.99218	9.80757	10.3225	5.97549	9.00804	9.10439	9.00461	7.73186	14.8887	11.4316
sp|O94830|DDHD2_HUMAN	O94830	9.21167	8.82508	8.63572	9.52954	8.6361	10.0705	10.2599	10.6829	11.091	9.65787	12.085	11.9695	12.2304	11.3149	11.5165	8.10466	10.9038	12.013	11.5504	11.6363	9.62605	11.2645	1.17021	0.00367966	0.0196931		sp|O94830|DDHD2_HUMAN	DDHD2	Phospholipase DDHD2 OS=Homo sapiens OX=9606 GN=DDHD2 PE=1 SV=2	6	7	8.4645	8.41249	8.39171	9.03304	8.35787	11.7927	11.9695	11.9404	10.6104	11.0274	9.34504	9.29359	9.97641	10.1021	8.58006	8.07601	10.634
sp|O94832|MYO1D_HUMAN	O94832	7.92216	8.57098	7.83618	8.93182	8.26389	7.6576	17.8757	10.1678	10.8605	18.5735	14.3708	10.089	15.0612	12.4393	10.4332	7.15455	9.40168	8.80062	8.1053	8.47599	10.0982	10.143	1.00444	0.978501	0.985368		sp|O94832|MYO1D_HUMAN	MYO1D	Unconventional myosin-Id OS=Homo sapiens OX=9606 GN=MYO1D PE=1 SV=2	42	36	7.27958	8.17027	7.61476	8.46646	7.99765	14.0233	10.089	14.7041	11.6648	9.99005	7.10596	16.1921	9.49533	9.89209	16.5007	7.12926	9.16904
sp|O94842|TOX4_HUMAN	O94842	11.3853	12.8354	12.1092	12.8435	13.2043	9.51003	10.9405	9.07676	11.546	7.00573	8.09448	9.59342	6.93824	8.5361	8.68097	10.3696	9.05985	13.6347	12.2172	12.321	10.865	9.74178	1.1153	0.250864	0.387039		sp|O94842|TOX4_HUMAN	TOX4	TOX high mobility group box family member 4 OS=Homo sapiens OX=9606 GN=TOX4 PE=1 SV=1	1	2	10.4618	12.2353	11.767	12.1743	12.7789	7.89873	9.59342	6.77375	8.00459	8.31226	8.82495	9.91006	8.47648	10.5165	6.2239	10.3329	8.83567
sp|O94854|K0754_HUMAN	O94854	11.5963	8.86233	10.8265	8.89018	9.24377	12.1455	12.8601	9.91754	11.2465	11.9281	9.53252	10.8573	11.8194	11.4309	11.0548	8.95119	13.281	6.551	10.2853	9.22389	10.6629	10.1338	1.05222	0.50967	0.635834		sp|O94854|K0754_HUMAN	KIAA0754	Uncharacterized protein KIAA0754 OS=Homo sapiens OX=9606 GN=KIAA0754 PE=2 SV=4	2	3	10.6557	8.448	10.5206	8.42699	8.94596	9.302	10.8573	11.5392	10.7191	10.5853	11.2706	11.6489	9.26165	10.2437	10.5969	8.91954	12.9524
sp|O94855|SC24D_HUMAN	O94855	6.55804	7.83119	6.26559	9.41235	9.3221	6.87916	18.023	9.83083	9.41834	20.2001	18.9967	6.60489	14.2093	12.5672	12.1952	8.85516	12.476	6.81362	7.50189	7.02314	9.5853	10.0807	1.05168	0.774935	0.846628		sp|O94855|SC24D_HUMAN	SEC24D	Protein transport protein Sec24D OS=Homo sapiens OX=9606 GN=SEC24D PE=1 SV=2	11	16	6.02611	7.46507	6.08855	8.92195	9.02177	18.5373	6.60489	13.8724	11.7847	11.6772	6.3836	16.3256	9.18068	8.57856	17.9458	8.82385	12.1673
sp|O94868|FCSD2_HUMAN	O94868	7.87771	10.5607	9.10948	10.0875	8.67866	6.84268	7.96346	9.95887	9.96066	7.4149	10.8905	11.5843	10.8584	11.3198	13.0062	5.17519	6.50764	18.3873	7.98498	25.3388	8.75942	10.9714	1.25252	0.155751	0.274823		sp|O94868|FCSD2_HUMAN	FCHSD2	F-BAR and double SH3 domains protein 2 OS=Homo sapiens OX=9606 GN=FCHSD2 PE=1 SV=3	2	2	7.23874	10.067	8.85208	9.56189	8.39906	10.6271	11.5843	10.601	10.615	12.4538	6.34975	7.21345	9.30025	9.07252	6.5874	5.15689	6.34661
sp|O94874|UFL1_HUMAN	O94874	9.97397	9.537	9.1346	9.68781	11.1756	10.9556	13.126	10.9697	11.4584	10.5432	11.2338	11.5173	10.893	10.1168	10.7234	7.30535	10.2963	10.0788	10.9049	10.6967	10.6011	10.3062	1.02862	0.599644	0.713549		sp|O94874|UFL1_HUMAN	UFL1	E3 UFM1-protein ligase 1 OS=Homo sapiens OX=9606 GN=UFL1 PE=1 SV=2	29	27	9.16497	9.09113	8.87649	9.18306	10.8156	10.9621	11.5173	10.6347	9.48686	10.2679	10.1664	11.8898	10.2442	10.4367	9.3666	7.27952	10.0415
sp|O94875|SRBS2_HUMAN	O94875	10.0432	12.3561	9.85646	10.2098	8.40377	11.3617	8.2766	10.7228	10.2798	8.12776	9.32996	11.3169	11.2372	11.3194	10.0232	18.4834	7.58314	12.7837	8.82453	8.9272	9.87762	10.663	1.07951	0.402444	0.538931		sp|O94875|SRBS2_HUMAN	SORBS2	Sorbin and SH3 domain-containing protein 2 OS=Homo sapiens OX=9606 GN=SORBS2 PE=1 SV=3	16	14	9.22856	11.7784	9.57795	9.67786	8.13302	9.10433	11.3169	10.9708	10.6146	9.59752	10.5432	7.49709	10.0137	9.36317	7.22071	18.4181	7.3955
sp|O94880|PHF14_HUMAN	O94880	11.2017	11.1122	10.8881	12.4195	11.619	7.8634	7.46778	5.81729	4.34446	8.62445	8.80518	8.82517	9.37896	9.46422	10.5144	21.2516	17.9461	14.1186	8.15715	8.91322	8.70662	11.0999	1.27489	0.128183	0.238043		sp|O94880|PHF14_HUMAN	PHF14	PHD finger protein 14 OS=Homo sapiens OX=9606 GN=PHF14 PE=1 SV=2	2	1	10.2931	10.5927	10.5804	11.7724	11.2447	8.59224	8.82517	9.1566	8.87492	10.0678	7.29694	6.76445	5.43257	3.95709	7.66197	21.1765	17.502
sp|O94885|SASH1_HUMAN	O94885	9.93421	9.12281	9.80883	9.07589	9.83308	8.6481	9.44597	10.3716	9.79028	9.84557	10.5362	11.6768	12.3651	9.69976	11.904	13.6205	11.3623	10.9704	10.8896	10.6744	9.57526	11.3237	1.1826	0.00012381	0.0022095		sp|O94885|SASH1_HUMAN	SASH1	SAM and SH3 domain-containing protein 1 OS=Homo sapiens OX=9606 GN=SASH1 PE=1 SV=3	10	8	9.12843	8.6963	9.53167	8.60302	9.51628	10.2814	11.6768	12.0719	9.0958	11.3984	8.02511	8.55633	9.68568	8.91734	8.74681	13.5723	11.0811
sp|O94886|CSCL1_HUMAN	O94886	12.2933	11.0713	9.87082	10.9843	8.6413	11.2438	11.825	13.021	13.8273	10.5948	9.72968	12.0006	11.1736	9.99809	8.35915	8.0765	8.41788	9.76518	9.44197	10.2398	11.2454	9.64947	1.16539	0.017885	0.0583007		sp|O94886|CSCL1_HUMAN	TMEM63A	CSC1-like protein 1 OS=Homo sapiens OX=9606 GN=TMEM63A PE=1 SV=3	3	4	11.2962	10.5537	9.59191	10.412	8.3629	9.49439	12.0006	10.9087	9.37555	8.00411	10.4338	10.7113	12.1599	12.5944	9.41245	8.04795	8.20958
sp|O94887|FARP2_HUMAN	O94887	9.39726	9.85071	9.70586	9.79459	10.4683	10.2935	9.12569	9.9165	10.4305	10.2563	9.57649	9.62736	10.7679	10.2664	14.6376	8.93345	11.5135	10.5311	12.4529	12.449	9.91482	10.9619	1.1056	0.0572348	0.132975		sp|O94887|FARP2_HUMAN	FARP2	FERM, ARHGEF and pleckstrin domain-containing protein 2 OS=Homo sapiens OX=9606 GN=FARP2 PE=1 SV=3	5	2	8.63503	9.39017	9.43161	9.28428	10.131	9.3449	9.62736	10.5126	9.62716	14.0159	9.55201	8.26622	9.26068	9.50048	9.11167	8.90187	11.2286
sp|O94888|UBXN7_HUMAN	O94888	9.50485	10.1035	9.62674	9.70682	9.76651	8.25648	10.0658	8.03111	8.30157	8.68312	11.2495	10.282	11.2484	10.726	11.8305	11.5219	12.6989	12.142	13.3703	12.3874	9.17269	11.7124	1.27687	4.05845e-06	0.000311763	3	sp|O94888|UBXN7_HUMAN	UBXN7	UBX domain-containing protein 7 OS=Homo sapiens OX=9606 GN=UBXN7 PE=1 SV=2	3	2	8.7339	9.63119	9.35472	9.20108	9.45186	10.9775	10.282	10.9817	10.0581	11.328	7.6617	9.11775	7.49998	7.56137	7.71409	11.4812	12.3847
sp|O94898|LRIG2_HUMAN	O94898	12.0229	12.4269	11.9412	9.99315	10.272	9.72637	9.73701	8.70603	9.53174	9.96881	8.43053	8.79883	10.1155	9.74565	10.4948	15.3329	11.7596	10.9424	9.24233	10.5969	10.3676	10.4019	1.00331	0.95679	0.971351		sp|O94898|LRIG2_HUMAN	LRIG2	Leucine-rich repeats and immunoglobulin-like domains protein 2 OS=Homo sapiens OX=9606 GN=LRIG2 PE=2 SV=3	1	2	11.0477	11.8459	11.6038	9.47249	9.94108	8.22665	8.79883	9.87565	9.13883	10.0491	9.0257	8.81996	8.13027	8.68185	8.8563	15.2787	11.4686
sp|O94901|SUN1_HUMAN	O94901	12.7408	11.6486	12.7427	10.4579	11.7607	14.3753	9.87816	10.3088	10.2815	10.4345	8.74691	8.41653	9.24481	8.72289	9.7688	8.64419	10.7307	9.49842	11.331	10.6542	11.3832	9.52836	1.19466	0.00268531	0.0160281		sp|O94901|SUN1_HUMAN	SUN1	SUN domain-containing protein 1 OS=Homo sapiens OX=9606 GN=SUN1 PE=1 SV=3	11	12	11.7074	11.104	12.3826	9.91304	11.3818	8.53538	8.41653	9.02563	8.17975	9.35389	13.3397	8.94782	9.62707	9.36475	9.26998	8.61363	10.4652
sp|O94903|PLPHP_HUMAN	O94903	9.88304	9.82609	9.9797	9.14404	10.2373	10.37	11.463	11.7225	11.4165	9.49979	11.5661	13.1488	10.8807	10.8079	8.44491	8.62258	9.18093	11.449	11.5099	10.8662	10.3206	10.5524	1.02246	0.673081	0.769837		sp|O94903|PLPHP_HUMAN	PLPBP	Pyridoxal phosphate homeostasis protein OS=Homo sapiens OX=9606 GN=PLPBP PE=1 SV=1	11	14	9.08141	9.3667	9.69771	8.66762	9.90749	11.2864	13.1488	10.6227	10.1349	8.08623	9.62295	10.3834	10.9472	10.3986	8.43962	8.59209	8.95375
sp|O94905|ERLN2_HUMAN	O94905	12.1954	11.4477	10.9385	9.95706	12.7483	13.8785	10.053	11.9034	13.2298	9.65987	8.54215	10.5881	9.68383	9.10881	8.93596	6.63644	7.75875	10.6149	11.0306	11.5996	11.5194	9.32765	1.23497	0.00583754	0.0272693	2	sp|O94905|ERLN2_HUMAN	ERLIN2	Erlin-2 OS=Homo sapiens OX=9606 GN=ERLIN2 PE=1 SV=1	43	44	11.2062	10.9125	10.6294	9.43828	12.3376	8.33558	10.5881	9.45424	8.54164	8.55642	12.8787	9.10617	11.1162	12.0502	8.58184	6.61298	7.56676
sp|O94906|PRP6_HUMAN	O94906	12.8618	12.2751	12.5094	11.6127	11.1368	13.5911	10.4677	11.4052	11.1622	9.46576	8.47745	9.31619	8.83517	9.04169	8.19351	8.47684	8.9771	11.608	10.4426	10.5313	11.5914	9.33438	1.2418	0.000329432	0.00381869	1	sp|O94906|PRP6_HUMAN	PRPF6	Pre-mRNA-processing factor 6 OS=Homo sapiens OX=9606 GN=PRPF6 PE=1 SV=1	24	19	11.8186	11.7012	12.1559	11.0077	10.778	8.27244	9.31619	8.6257	8.4787	7.84551	12.612	9.48185	10.6509	10.1669	8.40939	8.44687	8.75496
sp|O94910|AGRL1_HUMAN	O94910	10.598	10.4508	10.9184	10.8909	9.85849	8.25426	6.80105	6.07557	6.24062	5.77243	7.54431	9.74753	9.48671	12.7302	12.0273	18.4735	14.0769	10.7455	14.1943	14.0176	8.32307	11.9501	1.43578	0.00629444	0.0286128	3	sp|O94910|AGRL1_HUMAN	ADGRL1	Adhesion G protein-coupled receptor L1 OS=Homo sapiens OX=9606 GN=ADGRL1 PE=1 SV=1	2	2	9.73838	9.96218	10.6099	10.3235	9.54088	7.36187	9.74753	9.2618	11.9375	11.5165	7.65964	6.16051	5.67377	5.68418	5.12823	18.4082	13.7286
sp|O94911|ABCA8_HUMAN	O94911	7.01664	8.61459	8.01907	7.63168	6.00614	5.81606	12.0127	8.52032	9.40507	11.1431	16.7901	10.39	18.9094	9.6992	10.6222	10.4158	22.6351	8.30811	8.43589	8.99498	8.20691	11.7582	1.43272	0.0169745	0.0563002	4	sp|O94911|ABCA8_HUMAN	ABCA8	ATP-binding cassette sub-family A member 8 OS=Homo sapiens OX=9606 GN=ABCA8 PE=1 SV=3	1	3	6.44751	8.21184	7.79248	7.23406	5.81264	16.3841	10.39	18.4611	9.09527	10.171	5.39708	10.8813	7.95684	8.56647	9.89951	10.379	22.075
sp|O94913|PCF11_HUMAN	O94913	9.41297	10.584	10.578	10.5047	10.551	12.3538	10.375	11.1306	11.9802	7.52883	10.9858	10.4141	10.1601	8.7766	12.0416	4.46309	10.7661	16.1776	10.7885	10.4259	10.4159	10.0717	1.03417	0.779464	0.849349		sp|O94913|PCF11_HUMAN	PCF11	Pre-mRNA cleavage complex 2 protein Pcf11 OS=Homo sapiens OX=9606 GN=PCF11 PE=1 SV=3	2	1	8.64947	10.0892	10.2791	9.95739	10.2111	10.7201	10.4141	9.91922	8.23012	11.5302	11.4639	9.39787	10.3945	10.912	6.68862	4.44731	10.4997
sp|O94915|FRYL_HUMAN	O94915	9.44868	10.5866	11.4618	10.168	10.4169	12.7465	10.2931	12.3412	12.816	8.48892	9.70408	12.451	9.62474	11.4166	8.71619	7.07007	8.31369	11.5621	11.453	11.1125	10.7901	10.0009	1.07891	0.299594	0.437399		sp|O94915|FRYL_HUMAN	FRYL	Protein furry homolog-like OS=Homo sapiens OX=9606 GN=FRYL PE=1 SV=2	11	11	8.68228	10.0917	11.1379	9.63824	10.0813	9.46941	12.451	9.39655	10.7057	8.34599	11.8283	9.32371	11.525	11.6733	7.54156	7.04507	8.10797
sp|O94916|NFAT5_HUMAN	O94916						9.49705	7.67034	8.80775	7.11922	16.7498						10.8618	19.8661	7.86573	9.47025	8.00517	9.47855	10.5171	1.10957	0.660543	0.76194		sp|O94916|NFAT5_HUMAN	NFAT5	Nuclear factor of activated T-cells 5 OS=Homo sapiens OX=9606 GN=NFAT5 PE=1 SV=1	0	1	0	0	0	0	0	0	0	0	0	0	8.8129	6.94793	8.22526	6.48444	14.8805	10.8234	19.3745
sp|O94919|ENDD1_HUMAN	O94919	10.7151	9.98655	10.2405	10.1289	9.25231	8.30987	8.21789	9.99229	9.32818	7.6058	10.2252	11.5782	10.3882	10.1007	11.444	14.295	10.6679	11.5786	12.1243	13.1985	9.32504	11.4918	1.23236	0.000637734	0.00597287	3	sp|O94919|ENDD1_HUMAN	ENDOD1	Endonuclease domain-containing 1 protein OS=Homo sapiens OX=9606 GN=ENDOD1 PE=1 SV=2	20	22	9.84597	9.51966	9.95114	9.60121	8.95423	9.97796	11.5782	10.1419	9.4718	10.9579	7.71125	7.44391	9.33146	8.49644	6.757	14.2445	10.4039
sp|O94923|GLCE_HUMAN	O94923	10.8424	10.5159	10.9512	11.8791	10.6276	7.94947	7.45073	7.4207	9.25156	5.66056	10.2441	9.2736	10.7006	8.87112	10.2241	14.9401	20.5585	12.6127	9.21728	9.75777	9.0359	11.2379	1.24369	0.068757	0.152671		sp|O94923|GLCE_HUMAN	GLCE	D-glucuronyl C5-epimerase OS=Homo sapiens OX=9606 GN=GLCE PE=1 SV=3	5	2	9.96299	10.0243	10.6418	11.2602	10.2852	9.99641	9.2736	10.4469	8.31875	9.78989	7.37681	6.74901	6.92994	8.42665	5.02885	14.8873	20.0498
sp|O94925|GLSK_HUMAN	O94925	11.3318	11.8085	9.87786	11.1422	13.5563	9.94925	9.94359	10.0041	9.51891	13.5869	9.0762	7.35948	7.85179	10.2943	12.0264	10.3313	12.1234	9.78225	11.0827	9.76244	10.9837	9.85116	1.11497	0.120547	0.227767		sp|O94925|GLSK_HUMAN	GLS	Glutaminase kidney isoform, mitochondrial OS=Homo sapiens OX=9606 GN=GLS PE=1 SV=1	32	19	10.4127	11.2564	9.59875	10.5617	13.1196	8.85671	7.35948	7.66564	9.65332	11.5156	9.23253	9.00708	9.34249	8.67016	12.0706	10.2948	11.8234
sp|O94952|FBX21_HUMAN	O94952	10.1794	10.6637	11.0263	9.85	10.1939	8.05379	8.60597	10.6693	11.0059	10.4865	7.36681	9.66346	9.61345	12.9194	12.753	15.4654	9.34876	10.3209	10.8846	10.8058	10.0254	10.7064	1.06793	0.37696	0.516166		sp|O94952|FBX21_HUMAN	FBXO21	F-box only protein 21 OS=Homo sapiens OX=9606 GN=FBXO21 PE=2 SV=2	3	3	9.35369	10.1652	10.7147	9.3368	9.86552	7.18866	9.66346	9.38553	12.115	12.2113	7.47361	7.79544	9.96367	10.0246	9.31622	15.4107	9.11743
sp|O94953|KDM4B_HUMAN	O94953	11.0979	10.7682	10.2805	12.6661	11.2651						9.9939	7.88805	11.8994	10.2334	8.13067						11.1881	9.51646	1.17566	0.0909396	0.187272		sp|O94953|KDM4B_HUMAN	KDM4B	Lysine-specific demethylase 4B OS=Homo sapiens OX=9606 GN=KDM4B PE=1 SV=4	5	0	10.1977	10.2648	9.99002	12.0062	10.9022	9.75222	7.88805	11.6173	9.59621	7.78534	0	0	0	0	0	0	0
sp|O94955|RHBT3_HUMAN	O94955	11.2907	10.4744	9.11515	11.0006	8.7108	7.71448	8.05721	9.74003	9.00119	8.77873	8.83063	9.69418	9.20327	9.92672	15.9998	16.881	12.334	10.2573	11.8533	10.636	9.31938	11.2915	1.21161	0.0299531	0.0833184	3	sp|O94955|RHBT3_HUMAN	RHOBTB3	Rho-related BTB domain-containing protein 3 OS=Homo sapiens OX=9606 GN=RHOBTB3 PE=1 SV=2	3	2	10.3749	9.98467	8.85759	10.4275	8.43016	8.61708	9.69418	8.98508	9.30862	15.3202	7.15875	7.29837	9.09588	8.1986	7.79903	16.8213	12.0288
sp|O94966|UBP19_HUMAN	O94966	8.78693	10.4821	10.2817	10.1726	9.79441	7.8827	10.436	11.2929	11.6597	11.0977	11.0861	9.64175	8.44384	10.1207	15.2759	9.55352	10.5233	11.5482	10.9721	11.0523	10.1268	10.6986	1.05647	0.385778	0.524649		sp|O94966|UBP19_HUMAN	USP19	Ubiquitin carboxyl-terminal hydrolase 19 OS=Homo sapiens OX=9606 GN=USP19 PE=1 SV=2	5	5	8.07421	9.99209	9.99115	9.64259	9.47886	10.818	9.64175	8.24365	9.49055	14.6271	7.31485	9.45316	10.5461	10.6201	9.85924	9.51974	10.2629
sp|O94967|WDR47_HUMAN	O94967	7.507	7.87713	8.39228	8.77028	9.06239	9.23815	10.7596	11.8473	12.2781	11.4985	14.1396	11.8034	11.375	12.7008	12.2586	8.16841	8.1361	9.63899	12.8765	11.8616	9.58682	11.1204	1.15997	0.0874468	0.182401		sp|O94967|WDR47_HUMAN	WDR47	WD repeat-containing protein 47 OS=Homo sapiens OX=9606 GN=WDR47 PE=1 SV=1	1	3	6.8981	7.50886	8.15514	8.31334	8.77042	13.7977	11.8034	11.1053	11.91	11.7379	8.57265	9.74627	11.0638	11.1833	10.2153	8.13953	7.93477
sp|O94973|AP2A2_HUMAN	O94973	8.79379	9.64909	9.31982	9.34459	10.7769	11.5753	12.875	12.4001	12.7081	10.7462	11.6749	11.6067	10.9689	10.7392	11.069	7.21062	10.4445	9.28004	9.99274	9.24018	10.723	10.1321	1.05832	0.386098	0.524897		sp|O94973|AP2A2_HUMAN	AP2A2	AP-2 complex subunit alpha-2 OS=Homo sapiens OX=9606 GN=AP2A2 PE=1 SV=2	34	24	8.08051	9.19798	9.05648	8.85772	10.4297	11.3926	11.6067	10.7088	10.0705	10.5989	10.7414	11.6624	11.58	11.575	9.54692	7.18513	10.1861
sp|O94979|SC31A_HUMAN	O94979	8.20989	8.74664	8.55207	8.84947	8.10546	10.363	14.1251	10.8387	11.2211	11.8149	14.4518	12.6592	13.7544	11.2148	9.26226	7.9055	10.6858	9.96366	9.92556	9.57457	9.924	10.7654	1.08479	0.342998	0.481598		sp|O94979|SC31A_HUMAN	SEC31A	Protein transport protein Sec31A OS=Homo sapiens OX=9606 GN=SEC31A PE=1 SV=3	45	58	7.54397	8.33772	8.31042	8.3884	7.84432	14.1023	12.6592	13.4283	10.5165	8.86886	9.61647	12.7948	10.1219	10.2206	10.4964	7.87755	10.4214
sp|O94985|CSTN1_HUMAN	O94985	8.26611	10.8869	9.35418	9.28608	8.22502	8.24768	16.6588	11.3428	12.9358	14.9133	11.9374	10.3723	11.064	15.3107	9.39319	10.2598	8.52415	8.4478	7.64574	7.81461	10.6813	9.86135	1.08315	0.458167	0.589969		sp|O94985|CSTN1_HUMAN	CLSTN1	Calsyntenin-1 OS=Homo sapiens OX=9606 GN=CLSTN1 PE=1 SV=1	14	11	7.59563	10.3779	9.08986	8.80226	7.96003	11.6487	10.3723	10.8017	14.3574	8.99423	7.65354	15.0898	10.5927	11.7824	13.249	10.2235	8.31322
sp|O94988|FA13A_HUMAN	O94988	11.5	10.4735	11.0508	10.9389	9.07696	8.07734	8.43211	13.1013	13.5616	7.19358	8.62493	13.0931	10.189	11.4899	7.65046	8.62051	7.26033	13.42	12.5259	13.63	10.1412	10.3788	1.02344	0.819371	0.879012		sp|O94988|FA13A_HUMAN	FAM13A	Protein FAM13A OS=Homo sapiens OX=9606 GN=FAM13A PE=1 SV=2	1	4	10.5672	9.98386	10.7385	10.369	8.78452	8.41635	13.0931	9.94743	10.7745	7.32552	7.49547	7.63796	12.2349	12.3524	6.39078	8.59003	7.08067
sp|O94991|SLIK5_HUMAN	O94991	10.2219	9.25332	10.4396	11.2855	13.583						9.46385	9.53694	10.3071	6.44442	13.4943						10.8644	9.58494	1.13349	0.381485	0.520674		sp|O94991|SLIK5_HUMAN	SLITRK5	SLIT and NTRK-like protein 5 OS=Homo sapiens OX=9606 GN=SLITRK5 PE=2 SV=2	1	0	9.39282	8.82071	10.1446	10.6975	13.1454	9.23499	9.53694	10.0627	6.04315	12.9212	0	0	0	0	0	0	0
sp|O94992|HEXI1_HUMAN	O94992	8.71019	10.0239	12.3445	8.34609	9.3746	11.3482	9.53031	9.20352	7.61055	8.23162	12.4078	9.87976	11.8659	10.1093	10.8713	17.9331	12.3264	11.9554	8.03181	9.06174	9.37749	11.1888	1.19315	0.0489215	0.118442		sp|O94992|HEXI1_HUMAN	HEXIM1	Protein HEXIM1 OS=Homo sapiens OX=9606 GN=HEXIM1 PE=1 SV=1	8	3	8.00369	9.5553	11.9957	7.91125	9.07258	12.1077	9.87976	11.5846	9.47986	10.4096	10.5307	8.63273	8.59486	6.93196	7.31298	17.8697	12.0214
sp|O95025|SEM3D_HUMAN	O95025	8.86192	13.3235	11.3633	14.6284	8.75704						11.2198	5.67354	8.68691	10.7448	11.0641						11.144	9.19527	1.21193	0.279699	0.416753		sp|O95025|SEM3D_HUMAN	SEMA3D	Semaphorin-3D OS=Homo sapiens OX=9606 GN=SEMA3D PE=2 SV=2	1	0	8.14312	12.7006	11.0422	13.8662	8.47491	10.9485	5.67354	8.48096	10.0758	10.5942	0	0	0	0	0	0	0
sp|O95049|ZO3_HUMAN	O95049	15.4461	7.68804	7.59075	7.51559	7.38385						11.0142	9.52637	7.67278	11.8714	18.7302						8.70628	11.2351	1.29045	0.253779	0.389975		sp|O95049|ZO3_HUMAN	TJP3	Tight junction protein ZO-3 OS=Homo sapiens OX=9606 GN=TJP3 PE=1 SV=3	2	0	14.1932	7.32861	7.37626	7.12402	7.14596	10.7478	9.52637	7.49087	11.1322	17.9347	0	0	0	0	0	0	0
sp|O95057|DIRA1_HUMAN	O95057	8.4298	8.13308	8.95311	10.0876	10.1444	17.6348	10.8855	11.1749	12.4159	9.29453	10.9707	13.2107	12.9109	10.2288	10.7659	8.04918	7.08973	9.96848	10.1291	9.77099	10.4514	10.1496	1.02973	0.755416	0.833324		sp|O95057|DIRA1_HUMAN	DIRAS1	GTP-binding protein Di-Ras1 OS=Homo sapiens OX=9606 GN=DIRAS1 PE=1 SV=1	1	1	7.74605	7.75285	8.70013	9.56204	9.81762	10.7054	13.2107	12.6048	9.59185	10.3086	16.3644	9.86024	10.4359	11.3088	8.25727	8.02072	6.9143
sp|O95070|YIF1A_HUMAN	O95070	8.45748	10.6423	10.056	12.2807	9.48986	9.73517	10.6408	12.7103	11.8901	11.3236	11.1444	12.2294	10.2857	9.97516	9.38512	8.94145	9.23623	9.88321	11.0308	10.85	10.6459	10.2515	1.03847	0.464623	0.59556		sp|O95070|YIF1A_HUMAN	YIF1A	Protein YIF1A OS=Homo sapiens OX=9606 GN=YIF1A PE=1 SV=2	1	4	7.77148	10.1448	9.7719	11.6409	9.18412	10.8749	12.2294	10.0418	9.35405	8.98651	9.03387	9.6386	11.8697	10.8299	10.0599	8.90984	9.00768
sp|O95071|UBR5_HUMAN	O95071	10.5045	11.4754	11.0537	11.2359	10.637	10.0946	10.2232	9.7823	9.66567	10.009	10.0388	10.5422	9.59721	9.36102	9.64608	12.7188	11.7205	11.0636	10.1706	10.2751	10.4516	10.4685	1.00162	0.961877	0.974823		sp|O95071|UBR5_HUMAN	UBR5	E3 ubiquitin-protein ligase UBR5 OS=Homo sapiens OX=9606 GN=UBR5 PE=1 SV=2	8	6	9.65246	10.9389	10.7414	10.6505	10.2943	9.79608	10.5422	9.36968	8.77815	9.23638	9.36738	9.26034	9.13536	8.80384	8.89201	12.6738	11.4305
sp|O95081|AGFG2_HUMAN	O95081	6.52683	8.78433	9.1421	8.34775	11.3254	5.94519	12.5547	13.9985	12.6707	9.97523	11.3414	11.7327	11.4016	10.5885	14.6331	5.25955	8.83406	8.09446	15.5923	13.485	9.58485	10.6396	1.11004	0.446809	0.579268		sp|O95081|AGFG2_HUMAN	AGFG2	Arf-GAP domain and FG repeat-containing protein 2 OS=Homo sapiens OX=9606 GN=AGFG2 PE=1 SV=2	2	1	5.99743	8.37365	8.88378	7.91282	10.9605	11.0671	11.7327	11.1313	9.92918	14.0116	5.51691	11.3723	13.0727	11.5409	8.862	5.24095	8.61546
sp|O95084|PRS23_HUMAN	O95084	11.5417	8.88289	11.3733	6.84505	7.36929	11.8263	18.1382	13.0554	15.5811	12.7863	14.3832	8.77204	15.133	15.6471	4.17771	6.56	6.57858	5.99316	8.11898	8.61111	11.2618	8.61689	1.30695	0.134963	0.246788		sp|O95084|PRS23_HUMAN	PRSS23	Serine protease 23 OS=Homo sapiens OX=9606 GN=PRSS23 PE=1 SV=1	6	2	10.6055	8.4676	11.0519	6.48841	7.13187	14.0354	8.77204	14.7742	14.6728	4.00027	10.9744	16.4299	12.192	14.1918	11.3594	6.53681	6.41579
sp|O95104|SCAF4_HUMAN	O95104	8.3356	11.1439	13.297	9.19447	10.981	16.3026	9.2342	9.97415	8.16689	7.75394	11.5848	12.4325	10.8176	7.69791	8.28908	17.8501	13.0243	7.84394	8.43287	6.89732	10.1719	10.0532	1.01181	0.928409	0.952327		sp|O95104|SCAF4_HUMAN	SCAF4	SR-related and CTD-associated factor 4 OS=Homo sapiens OX=9606 GN=SCAF4 PE=1 SV=3	6	3	7.65949	10.6229	12.9213	8.71542	10.6272	11.3046	12.4325	10.5611	7.21859	7.93702	15.1282	8.36451	9.31452	7.43869	6.88861	17.787	12.702
sp|O95139|NDUB6_HUMAN	O95139	13.7046	12.2544	11.7869	11.9477	11.2784	17.6912	13.0475	10.7906	10.8282	11.1396	7.83737	8.90063	8.22436	9.58826	8.83773	5.72922	6.85402	8.63086	11.6922	10.3099	12.3136	8.5075	1.44738	0.000192706	0.00285761	2	sp|O95139|NDUB6_HUMAN	NDUFB6	NADH dehydrogenase [ubiquinone] 1 beta subcomplex subunit 6 OS=Homo sapiens OX=9606 GN=NDUFB6 PE=1 SV=3	7	9	12.593	11.6815	11.4538	11.3252	10.915	7.64784	8.90063	8.02937	8.99124	8.46237	16.4168	11.8187	10.077	9.86273	9.89639	5.70896	6.68442
sp|O95140|MFN2_HUMAN	O95140	12.7891	11.8354	10.9806	12.0085	11.1034	13.5412	8.99789	10.1091	9.62268	10.4395	8.31517	8.90968	8.31816	9.11315	10.9416	11.1948	11.8166	10.616	9.50847	10.0254	11.0613	9.80661	1.12795	0.0473025	0.115633		sp|O95140|MFN2_HUMAN	MFN2	Mitofusin-2 OS=Homo sapiens OX=9606 GN=MFN2 PE=1 SV=3	24	13	11.7518	11.2821	10.6703	11.3828	10.7457	8.11408	8.90968	8.12095	8.54571	10.4769	12.5657	8.15045	9.44051	8.76468	9.27447	11.1552	11.5242
sp|O95149|SPN1_HUMAN	O95149	8.01665	8.59652	8.2961	8.84444	9.57881	6.12946	9.31155	9.72211	8.49289	8.07325	11.6715	11.8395	11.4624	13.9883	11.6831	13.5758	13.0201	14.6189	10.8384	11.4197	8.444	12.3537	1.46302	9.03449e-07	0.000131291	3	sp|O95149|SPN1_HUMAN	SNUPN	Snurportin-1 OS=Homo sapiens OX=9606 GN=SNUPN PE=1 SV=1	2	1	7.36641	8.19462	8.06168	8.38363	9.27021	11.3892	11.8395	11.1906	13.1173	11.1869	5.68791	8.43457	9.07915	7.73563	7.17228	13.5278	12.6979
sp|O95154|ARK73_HUMAN	O95154	8.54079	10.2964	9.25036	10.7708	9.18107	3.30956	5.03533	6.75328	7.43013	4.3279	7.16759	13.9024	11.2916	15.2753	8.36362	6.40022	4.94951	23.004	20.0553	23.4544	7.02112	11.729	1.67053	0.0284221	0.080443	3	sp|O95154|ARK73_HUMAN	AKR7A3	Aflatoxin B1 aldehyde reductase member 3 OS=Homo sapiens OX=9606 GN=AKR7A3 PE=1 SV=2	1	3	7.84803	9.81498	8.98898	10.2096	8.88528	6.99426	13.9024	11.0239	14.3242	8.00839	3.07115	4.56109	6.30666	6.76763	3.84491	6.37759	4.82704
sp|O95155|UBE4B_HUMAN	O95155	9.17711	11.6087	10.4967	11.0475	9.81924	7.7589	9.34714	11.9325	10.8022	10.9288	9.67108	13.2917	9.22974	10.1789	9.44248	8.7782	9.91317	11.9513	12.4944	12.0453	10.2169	10.5964	1.03715	0.561164	0.679022		sp|O95155|UBE4B_HUMAN	UBE4B	Ubiquitin conjugation factor E4 B OS=Homo sapiens OX=9606 GN=UBE4B PE=1 SV=1	6	3	8.43274	11.066	10.2001	10.4719	9.50289	9.4372	13.2917	9.01092	9.54506	9.04143	7.19997	8.46681	11.1434	9.83899	9.70914	8.74716	9.66787
sp|O95159|ZFPL1_HUMAN	O95159						7.84684	8.90387	10.3073	9.76137	10.2202						15.2722	9.27541	11.6933	10.6651	11.5949	9.36004	11.542	1.23312	0.0612148	0.139634		sp|O95159|ZFPL1_HUMAN	ZFPL1	Zinc finger protein-like 1 OS=Homo sapiens OX=9606 GN=ZFPL1 PE=1 SV=2	0	7	0	0	0	0	0	0	0	0	0	0	7.28157	8.06529	9.62568	8.891	9.0796	15.2182	9.04589
sp|O95163|ELP1_HUMAN	O95163	10.1143	10.1038	11.0108	10.7105	10.2233	9.37711	9.54735	11.9289	11.9934	10.015	9.39149	11.1881	10.0531	11.1841	10.1027	8.93257	9.40244	10.8816	11.6895	12.2664	10.4684	10.4574	1.00105	0.982183	0.987742		sp|O95163|ELP1_HUMAN	ELP1	Elongator complex protein 1 OS=Homo sapiens OX=9606 GN=ELP1 PE=1 SV=3	15	23	9.29395	9.63143	10.6997	10.1525	9.89395	9.16438	11.1881	9.81471	10.4877	9.67357	8.7016	8.64816	11.14	10.924	8.89736	8.90099	9.16978
sp|O95167|NDUA3_HUMAN	O95167	9.46819	9.00202	9.99564	8.9165	9.62447	19.9102	13.6711	7.56575	7.71656	7.41629	13.3643	13.1203	13.4747	8.41176	8.39083	15.9579	10.2097	9.33151	6.87375	7.16075	9.85219	10.224	1.03773	0.785785	0.85431		sp|O95167|NDUA3_HUMAN	NDUFA3	NADH dehydrogenase [ubiquinone] 1 alpha subcomplex subunit 3 OS=Homo sapiens OX=9606 GN=NDUFA3 PE=1 SV=1	3	1	8.70021	8.58116	9.7132	8.45194	9.3144	13.0411	13.1203	13.1552	7.88799	8.03445	18.4759	12.3835	7.0654	7.02852	6.58864	15.9015	9.95702
sp|O95168|NDUB4_HUMAN	O95168	11.404	11.8747	14.6465	13.6774	11.9057	7.84788	5.11665	7.66629	8.50825	7.34499	6.53639	8.02838	7.68009	9.03928	9.50446	8.08715	9.21227	20.4113	15.5115	15.3678	9.53526	10.2298	1.07284	0.660949	0.76194		sp|O95168|NDUB4_HUMAN	NDUFB4	NADH dehydrogenase [ubiquinone] 1 beta subcomplex subunit 4 OS=Homo sapiens OX=9606 GN=NDUFB4 PE=1 SV=3	3	3	10.479	11.3195	14.2326	12.9648	11.5221	6.37832	8.02838	7.49801	8.47644	9.10078	7.28254	4.63475	7.15929	7.74962	6.5253	8.05856	8.98431
sp|O95169|NDUB8_HUMAN	O95169	9.34592	10.6451	10.9311	10.5234	10.4229	11.9783	10.1305	9.5798	9.71861	9.2347	10.8995	12.1672	10.603	8.71984	9.65896	11.5849	9.66004	11.6759	11.2319	10.993	10.2211	10.6689	1.04381	0.313052	0.45213		sp|O95169|NDUB8_HUMAN	NDUFB8	NADH dehydrogenase [ubiquinone] 1 beta subcomplex subunit 8, mitochondrial OS=Homo sapiens OX=9606 GN=NDUFB8 PE=1 SV=1	6	7	8.58786	10.1474	10.6222	9.97508	10.0871	10.6359	12.1672	10.3516	8.17689	9.24872	11.1154	9.17639	8.94625	8.85206	8.20412	11.5439	9.421
sp|O95182|NDUA7_HUMAN	O95182	11.9261	11.2355	13.0615	12.23	11.3133	20.7959	9.86072	7.90498	8.10367	6.96004	10.0576	9.61743	9.49252	7.90038	7.29919	6.12929	7.80761	11.7191	14.1065	12.6317	10.8272	9.3833	1.15388	0.280686	0.41757		sp|O95182|NDUA7_HUMAN	NDUFA7	NADH dehydrogenase [ubiquinone] 1 alpha subcomplex subunit 7 OS=Homo sapiens OX=9606 GN=NDUFA7 PE=1 SV=3	4	2	10.9588	10.7102	12.6924	11.5928	10.9488	9.81434	9.61743	9.26747	7.40846	6.98917	19.2978	8.93202	7.38219	7.38111	6.18331	6.10762	7.61441
sp|O95196|CSPG5_HUMAN	O95196	10.5587	8.82289	8.55504	8.4391	7.56636	4.6667	7.37255	13.7126	15.4097	7.14307	9.86742	14.1933	12.2735	15.0402	8.71394	9.5108	7.82984	15.4418	10.6681	13.9043	8.75397	11.441	1.30695	0.0589494	0.135893		sp|O95196|CSPG5_HUMAN	CSPG5	Chondroitin sulfate proteoglycan 5 OS=Homo sapiens OX=9606 GN=CSPG5 PE=1 SV=3	8	10	9.70227	8.41041	8.31331	7.99941	7.32259	9.6288	14.1933	11.9825	14.1037	8.34383	4.33052	6.67819	12.8057	14.0357	6.34591	9.47717	7.63609
sp|O95197|RTN3_HUMAN	O95197	8.47276	4.96377	4.56102	4.82641	5.60021	19.5371	15.4652	9.18112	10.3464	12.8439	18.1809	17.366	22.4522	7.30848	9.5824	6.67231	8.48973	6.42847	8.99517	8.98649	8.47486	10.3866	1.22558	0.368318	0.508039		sp|O95197|RTN3_HUMAN	RTN3	Reticulon-3 OS=Homo sapiens OX=9606 GN=RTN3 PE=1 SV=2	3	8	7.78552	4.73171	4.43214	4.57495	5.41979	17.7412	17.366	21.9199	6.85341	9.17541	18.1297	14.0087	8.57394	9.42388	11.4105	6.64872	8.27965
sp|O95199|RCBT2_HUMAN	O95199	6.7245	7.982	9.42793	7.86066	8.81863	8.12969	10.4219	8.51828	5.974	9.72881	15.5763	10.9151	12.5192	11.1472	12.8192	16.4145	17.3705	9.53266	8.13756	10.9954	8.25609	12.2153	1.47955	0.000552359	0.00542062	3	sp|O95199|RCBT2_HUMAN	RCBTB2	RCC1 and BTB domain-containing protein 2 OS=Homo sapiens OX=9606 GN=RCBTB2 PE=1 SV=1	1	1	6.17907	7.60883	9.16153	7.45111	8.53452	15.1996	10.9151	12.2224	10.4531	12.2747	7.54405	9.44032	7.95493	5.44133	8.64308	16.3565	16.9407
sp|O95202|LETM1_HUMAN	O95202	12.555	13.5223	12.4143	12.0504	7.9461	8.93575	7.55241	10.6533	10.9248	8.113	7.88055	11.374	10.0978	10.247	6.12588	9.76304	9.74599	13.4497	13.0345	13.4142	10.2547	10.2429	1.00115	0.994177	0.99601		sp|O95202|LETM1_HUMAN	LETM1	Mitochondrial proton/calcium exchanger protein OS=Homo sapiens OX=9606 GN=LETM1 PE=1 SV=1	50	45	11.5366	12.8901	12.0635	11.4226	7.6901	7.68997	11.374	9.85844	9.60898	5.8657	8.29204	6.84111	9.94873	9.95066	7.2076	9.72852	9.50483
sp|O95208|EPN2_HUMAN	O95208						9.87729	12.0288	10.5176	10.4082	9.03708						11.0105	9.0688	10.5158	11.5507	11.9175	10.3285	10.7646	1.04223	0.552569	0.671507		sp|O95208|EPN2_HUMAN	EPN2	Epsin-2 OS=Homo sapiens OX=9606 GN=EPN2 PE=1 SV=3	0	2	0	0	0	0	0	0	0	0	0	0	9.16575	10.8959	9.82202	9.48018	8.02855	10.9716	8.84439
sp|O95210|STBD1_HUMAN	O95210	11.9766	10.7284	11.3049	10.5581	14.8407						8.90804	7.16884	7.30678	8.54157	12.9576						11.7879	8.76202	1.34534	0.0430899	0.108366		sp|O95210|STBD1_HUMAN	STBD1	Starch-binding domain-containing protein 1 OS=Homo sapiens OX=9606 GN=STBD1 PE=1 SV=1	3	0	11.0052	10.2268	10.9855	10.008	14.3626	8.69262	7.16884	7.13355	8.00972	12.4073	0	0	0	0	0	0	0
sp|O95214|LERL1_HUMAN	O95214	6.63748	9.25194	7.33934	17.1786	4.45085	19.5704	13.1121	15.0615	17.5542	6.31021	12.0349	18.0249	14.8948	9.97467	3.85828	8.40911	6.22323	4.38425	8.12413	8.1194	10.3965	8.46176	1.22865	0.373478	0.512884		sp|O95214|LERL1_HUMAN	LEPROTL1	Leptin receptor overlapping transcript-like 1 OS=Homo sapiens OX=9606 GN=LEPROTL1 PE=1 SV=2	1	2	6.0991	8.8194	7.13196	16.2836	4.30746	11.7439	18.0249	14.5417	9.35359	3.69441	18.1606	11.8772	14.0654	15.989	5.606	8.37938	6.06924
sp|O95218|ZRAB2_HUMAN	O95218	9.99635	9.96839	10.0143	10.0076	13.6934	11.5926	9.61657	8.57134	8.30026	11.6035	9.27957	7.4657	9.51017	7.73362	16.4849	10.8664	10.8387	15.2986	8.85309	10.1939	10.2326	10.3167	1.00822	0.924825	0.949419		sp|O95218|ZRAB2_HUMAN	ZRANB2	Zinc finger Ran-binding domain-containing protein 2 OS=Homo sapiens OX=9606 GN=ZRANB2 PE=1 SV=2	4	8	9.18553	9.50235	9.73135	9.48621	13.2522	9.05516	7.4657	9.2847	7.25208	15.7847	10.7575	8.71086	8.00448	7.56017	10.3086	10.828	10.5705
sp|O95219|SNX4_HUMAN	O95219	8.64743	10.1355	9.08958	9.57645	8.38082	8.8616	11.7754	11.4506	11.4223	12.0138	10.3288	10.8335	10.6633	14.5376	11.9223	9.09365	10.2713	11.1584	10.0067	10.1586	10.0474	10.816	1.0765	0.231485	0.365616		sp|O95219|SNX4_HUMAN	SNX4	Sorting nexin-4 OS=Homo sapiens OX=9606 GN=SNX4 PE=1 SV=1	9	19	7.94602	9.66168	8.83274	9.0775	8.11081	10.079	10.8335	10.4105	13.6324	11.4159	8.22323	10.6664	10.6933	10.4038	10.6731	9.0615	10.0171
sp|O95232|LC7L3_HUMAN	O95232						31.7221	25.1652	3.27048	6.03597	8.86026						7.2691	9.27696	5.76139	5.59661	4.21995	10.6904	6.20196	1.72371	0.250108	0.386417		sp|O95232|LC7L3_HUMAN	LUC7L3	Luc7-like protein 3 OS=Homo sapiens OX=9606 GN=LUC7L3 PE=1 SV=2	0	1	0	0	0	0	0	0	0	0	0	0	29.4369	22.7951	3.05419	5.49778	7.87146	7.2434	9.0474
sp|O95248|MTMR5_HUMAN	O95248	8.06357	8.64959	10.3333	8.57282	8.06061	11.8954	11.942	12.1381	11.5999	9.27848	13.3403	13.0281	13.5143	9.3093	10.869	10.6983	8.45644	10.5419	9.69643	9.87992	9.92155	10.8062	1.08917	0.266098	0.402553		sp|O95248|MTMR5_HUMAN	SBF1	Myotubularin-related protein 5 OS=Homo sapiens OX=9606 GN=SBF1 PE=1 SV=4	13	8	7.40952	8.24521	10.0413	8.12616	7.80092	13.0177	13.0281	13.1939	8.72965	10.4074	11.0385	10.8173	11.3354	10.5656	8.24301	10.6605	8.24719
sp|O95249|GOSR1_HUMAN	O95249	10.7751	10.6104	8.2923	10.115	9.87724	9.54656	10.4638	10.5134	11.0551	8.71821	11.0717	12.5197	9.80894	11.5722	9.42833	10.5854	10.0866	11.4246	12.1182	11.31	9.95795	10.9508	1.09971	0.0348778	0.0933307		sp|O95249|GOSR1_HUMAN	GOSR1	Golgi SNAP receptor complex member 1 OS=Homo sapiens OX=9606 GN=GOSR1 PE=1 SV=1	7	6	9.90113	10.1143	8.05799	9.58804	9.55902	10.804	12.5197	9.57639	10.8516	9.02788	8.85885	9.47826	9.81808	10.0694	7.74527	10.548	9.837
sp|O95251|KAT7_HUMAN	O95251						13.077	10.4539	8.19143	9.51818	16.5781						12.8982	13.4278	7.65331	6.95538	7.54852	11.2059	9.30064	1.20485	0.3553	0.494792		sp|O95251|KAT7_HUMAN	KAT7	Histone acetyltransferase KAT7 OS=Homo sapiens OX=9606 GN=KAT7 PE=1 SV=1	0	1	0	0	0	0	0	0	0	0	0	0	12.135	9.46937	7.6497	8.6695	14.728	12.8526	13.0955
sp|O95260|ATE1_HUMAN	O95260	8.84629	9.47089	10.4912	9.91281	9.63868	7.9759	9.0387	12.3133	10.9773	11.7137	9.90755	11.0256	10.2674	11.9942	12.4893	7.95235	9.52095	13.8069	11.052	11.6561	9.95782	10.8508	1.08967	0.201051	0.330102		sp|O95260|ATE1_HUMAN	ATE1	Arginyl-tRNA--protein transferase 1 OS=Homo sapiens OX=9606 GN=ATE1 PE=1 SV=2	16	11	8.12875	9.02811	10.1948	9.39634	9.32815	9.66796	11.0256	10.024	11.2474	11.9588	7.40133	8.18742	11.499	9.99848	10.4065	7.92423	9.28536
sp|O95278|EPM2A_HUMAN	O95278	13.0324	13.3549	9.05436	11.8061	8.9369						9.32624	8.86912	8.43514	11.7481	9.85252						11.0704	9.58162	1.15538	0.202854	0.332122		sp|O95278|EPM2A_HUMAN	EPM2A	Laforin OS=Homo sapiens OX=9606 GN=EPM2A PE=1 SV=2	1	0	11.9753	12.7305	8.79852	11.191	8.64898	9.1007	8.86912	8.23516	11.0166	9.43405	0	0	0	0	0	0	0
sp|O95292|VAPB_HUMAN	O95292	10.5922	11.2274	9.76828	12.0469	12.0119	11.9209	11.0095	10.2183	10.2411	10.8637	9.31574	9.27236	8.66358	10.2746	11.0414	10.2198	10.4092	10.8626	10.37	9.93894	10.9631	10.0111	1.0951	0.014304	0.0499424		sp|O95292|VAPB_HUMAN	VAPB	Vesicle-associated membrane protein-associated protein B/C OS=Homo sapiens OX=9606 GN=VAPB PE=1 SV=3	18	16	9.73302	10.7025	9.49226	11.4192	11.6249	9.09046	9.27236	8.45818	9.63483	10.5724	11.0621	9.97265	9.54251	9.32794	9.65129	10.1837	10.1516
sp|O95295|SNAPN_HUMAN	O95295	9.16416	8.78434	9.91174	8.6901	9.13706	7.44624	9.78869	7.56048	7.65519	7.95245	12.3148	12.038	11.2473	10.8057	11.8278	15.0434	12.2183	12.7824	12.2511	12.4719	8.56535	12.2565	1.43094	1.62983e-07	5.4915e-05	3	sp|O95295|SNAPN_HUMAN	SNAPIN	SNARE-associated protein Snapin OS=Homo sapiens OX=9606 GN=SNAPIN PE=1 SV=1	2	10	8.42084	8.37366	9.63167	8.23733	8.84269	12.017	12.038	10.9806	10.1329	11.3254	6.90983	8.86677	7.06048	6.97262	7.06496	14.9902	11.916
sp|O95297|MPZL1_HUMAN	O95297	9.50488	10.9771	10.2658	12.0842	11.5701	9.78634	12.3785	8.88453	9.42325	13.0294	11.7143	8.89695	10.0692	10.2256	8.80108	10.8575	12.7766	10.105	8.68121	10.1707	10.7064	10.1573	1.05406	0.371038	0.510538		sp|O95297|MPZL1_HUMAN	MPZL1	Myelin protein zero-like protein 1 OS=Homo sapiens OX=9606 GN=MPZL1 PE=1 SV=1	3	4	8.73392	10.4639	9.97571	11.4546	11.1973	11.431	8.89695	9.83048	9.58886	8.42727	9.08135	11.2127	8.29696	8.58303	11.5753	10.8191	12.4604
sp|O95298|NDUC2_HUMAN	O95298	9.60236	10.6006	13.7378	12.3852	10.3642	11.9649	8.37443	8.95674	9.62882	7.78283	9.03261	12.4179	9.99186	8.99845	6.81594	10.475	8.97026	13.9293	12.9512	12.5353	10.1901	10.3861	1.01924	0.83165	0.889299		sp|O95298|NDUC2_HUMAN	NDUFC2	NADH dehydrogenase [ubiquinone] 1 subunit C2 OS=Homo sapiens OX=9606 GN=NDUFC2 PE=1 SV=1	3	3	8.8235	10.105	13.3496	11.7399	10.0303	8.81417	12.4179	9.75497	8.43815	6.52645	11.103	7.58571	8.3644	8.77027	6.91427	10.438	8.74829
sp|O95299|NDUAA_HUMAN	O95299	13.9219	12.3095	12.6189	13.078	11.63	10.4995	7.97982	10.6619	10.5693	9.98316	6.94421	8.46913	7.91271	8.97251	8.53741	6.83409	8.74439	14.9724	12.7875	12.8419	11.198	9.37377	1.19461	0.0927555	0.189552		sp|O95299|NDUAA_HUMAN	NDUFA10	NADH dehydrogenase [ubiquinone] 1 alpha subcomplex subunit 10, mitochondrial OS=Homo sapiens OX=9606 GN=NDUFA10 PE=1 SV=1	22	16	12.7927	11.734	12.2623	12.3966	11.2553	6.77628	8.46913	7.72511	8.41383	8.1748	9.74316	7.22827	9.95677	9.62691	8.86905	6.80993	8.52801
sp|O95302|FKBP9_HUMAN	O95302	8.33324	10.5224	8.42539	11.3744	11.3518	6.70442	15.349	8.74108	8.9965	19.2973	12.1713	7.64092	11.4862	13.9444	8.92823	10.1431	16.4656	7.11763	7.10472	6.70496	10.4066	9.72042	1.07059	0.634546	0.74071		sp|O95302|FKBP9_HUMAN	FKBP9	Peptidyl-prolyl cis-trans isomerase FKBP9 OS=Homo sapiens OX=9606 GN=FKBP9 PE=1 SV=2	13	15	7.65732	10.0305	8.18732	10.7818	10.9861	11.877	7.64092	11.2139	13.0761	8.54902	6.22145	13.9034	8.163	8.19433	17.1437	10.1072	16.0582
sp|O95319|CELF2_HUMAN	O95319	14.8628	11.5201	12.3703	13.0319	11.5741	11.5095	9.07253	12.4259	12.0309	12.7695	6.92352	8.437	6.84468	9.373	9.52598	8.60309	8.01177	11.0637	10.3986	10.4356	12.0338	8.85203	1.35944	0.000193137	0.00285761	1	sp|O95319|CELF2_HUMAN	CELF2	CUGBP Elav-like family member 2 OS=Homo sapiens OX=9606 GN=CELF2 PE=1 SV=1	11	14	13.6573	10.9815	12.0208	12.3529	11.2012	6.75609	8.437	6.6824	8.78938	9.12138	10.6804	8.21806	11.6041	10.9582	11.3444	8.57267	7.81352
sp|O95336|6PGL_HUMAN	O95336	8.98144	9.11089	9.35717	10.264	10.0063	8.2884	9.69414	9.69711	9.99408	9.49083	11.8493	11.6588	10.9338	11.0809	10.7247	11.7346	11.9873	12.1317	11.1779	11.4275	9.47177	11.4617	1.21009	2.43422e-07	6.85639e-05	3	sp|O95336|6PGL_HUMAN	PGLS	6-phosphogluconolactonase OS=Homo sapiens OX=9606 GN=PGLS PE=1 SV=2	19	20	8.25294	8.68494	9.09277	9.72922	9.68396	11.5627	11.6588	10.6746	10.3909	10.2692	7.69132	8.78113	9.0558	9.10296	8.43166	11.6931	11.6907
sp|O95340|PAPS2_HUMAN	O95340	7.87918	5.28769	6.21276	9.73366	6.81032	6.20609	21.7671	9.57899	10.5615	18.8266	18.2904	8.3274	15.7353	15.3471	10.3762	5.24664	10.8695	9.84413	6.54508	7.8033	9.21491	10.0905	1.09502	0.654106	0.756804		sp|O95340|PAPS2_HUMAN	PAPSS2	Bifunctional 3'-phosphoadenosine 5'-phosphosulfate synthase 2 OS=Homo sapiens OX=9606 GN=PAPSS2 PE=1 SV=2	3	2	7.24009	5.04048	6.03721	9.22652	6.59091	17.8481	8.3274	15.3622	14.3915	9.93548	5.75902	19.717	8.94549	9.61978	16.7256	5.22809	10.6005
sp|O95343|SIX3_HUMAN	O95343	12.2069	10.8624	13.6972	9.91964	15.0375	6.68232	6.39405	11.5536	10.2802	7.63041	6.75605	10.2397	7.49986	9.50098	8.45796	8.50619	12.6541	14.3703	13.7687	13.5447	10.048	10.1863	1.01376	0.916862	0.944315		sp|O95343|SIX3_HUMAN	SIX3	Homeobox protein SIX3 OS=Homo sapiens OX=9606 GN=SIX3 PE=1 SV=1	1	1	11.2168	10.3546	13.3102	9.40281	14.553	6.59267	10.2397	7.32205	8.90939	8.09873	6.20094	5.79185	10.7895	9.3636	6.77886	8.47612	12.341
sp|O95352|ATG7_HUMAN	O95352	8.88078	8.94075	8.66012	9.51259	9.6591	8.37205	12.0764	11.3426	11.4226	11.5567	12.394	11.6667	12.3286	10.9786	10.9075	8.25329	10.5407	10.2026	11.1966	11.2693	9.95558	10.9107	1.09594	0.125997	0.235201		sp|O95352|ATG7_HUMAN	ATG7	Ubiquitin-like modifier-activating enzyme ATG7 OS=Homo sapiens OX=9606 GN=ATG7 PE=1 SV=1	17	16	8.16045	8.52276	8.41542	9.01697	9.34791	12.0943	11.6667	12.0363	10.295	10.4442	7.76895	10.939	10.5925	10.4041	10.267	8.22411	10.2799
sp|O95359|TACC2_HUMAN	O95359	10.2353	10.096	10.7982	10.3647	11.3484	6.50099	8.32263	9.08405	7.90615	8.6872	8.96471	9.63639	8.25802	10.8807	13.598	16.2807	14.6023	11.495	12.1863	10.0396	9.21819	11.344	1.23061	0.0293095	0.0820084	3	sp|O95359|TACC2_HUMAN	TACC2	Transforming acidic coiled-coil-containing protein 2 OS=Homo sapiens OX=9606 GN=TACC2 PE=1 SV=3	9	6	9.40511	9.62397	10.4931	9.82468	10.9828	8.74792	9.63639	8.06224	10.2032	13.0205	6.03267	7.53879	8.48329	7.2012	7.71772	16.2231	14.241
sp|O95361|TRI16_HUMAN	O95361	11.8129	11.5278	11.3664	9.28719	8.74286	6.54048	7.25875	8.34934	7.66776	9.06345	9.64286	10.1223	11.0265	11.6359	9.02143	16.2479	15.5658	11.2899	11.6275	11.4223	8.99363	11.5662	1.28604	0.0102291	0.0393886	3	sp|O95361|TRI16_HUMAN	TRIM16	Tripartite motif-containing protein 16 OS=Homo sapiens OX=9606 GN=TRIM16 PE=1 SV=3	3	6	10.8547	10.9889	11.0452	8.80331	8.46119	9.40967	10.1223	10.7651	10.9114	8.63826	6.06932	6.57511	7.79717	6.98407	8.05198	16.1905	15.1806
sp|O95363|SYFM_HUMAN	O95363	11.5184	10.7712	10.4913	9.81381	10.6245	8.75294	8.68704	10.664	10.7133	10.2328	10.4869	9.53653	10.4609	10.8685	9.60206	10.0211	10.0724	11.6843	12.0928	12.8928	10.1894	10.7218	1.05225	0.251962	0.388125		sp|O95363|SYFM_HUMAN	FARS2	Phenylalanine--tRNA ligase, mitochondrial OS=Homo sapiens OX=9606 GN=FARS2 PE=1 SV=1	2	3	10.5841	10.2676	10.1949	9.3025	10.2822	10.2333	9.53653	10.2129	10.1918	9.19423	8.1224	7.86888	9.95874	9.75803	9.09086	9.98564	9.82319
sp|O95372|LYPA2_HUMAN	O95372	10.4139	9.14575	10.4539	9.73163	9.63465	8.9295	9.45356	11.1616	11.2258	10.1237	10.3999	10.9063	11.2583	10.8455	11.2677	6.78696	10.0757	14.4269	11.2901	12.4751	9.99963	10.8047	1.08051	0.247686	0.383871		sp|O95372|LYPA2_HUMAN	LYPLA2	Acyl-protein thioesterase 2 OS=Homo sapiens OX=9606 GN=LYPLA2 PE=1 SV=1	12	14	9.56923	8.71817	10.1585	9.2246	9.32425	10.1484	10.9063	10.9914	10.1702	10.7891	8.28624	8.56321	10.4234	10.2249	8.99391	6.76296	9.82638
sp|O95373|IPO7_HUMAN	O95373	8.74288	9.09925	9.18597	9.55388	9.70014	9.3667	12.2378	10.545	10.9816	11.7866	12.7083	12.0405	11.6717	11.3432	9.86796	10.5128	11.4028	9.21298	10.2773	9.84155	10.058	10.8365	1.0774	0.145338	0.260661		sp|O95373|IPO7_HUMAN	IPO7	Importin-7 OS=Homo sapiens OX=9606 GN=IPO7 PE=1 SV=1	33	30	8.03373	8.67385	8.92641	9.05611	9.38763	12.401	12.0405	11.395	10.6369	9.44884	8.69194	11.0852	9.84758	10.0024	10.4712	10.4756	11.1206
sp|O95379|TFIP8_HUMAN	O95379	6.56923	7.6782	7.56691	6.96657	6.09749	7.29612	8.32505	9.24431	8.46166	8.55312	15.076	16.1807	15.7971	11.2907	10.3227	19.3615	13.5036	11.7481	9.21374	9.32814	7.61868	12.8055	1.6808	1.92133e-05	0.000769037	3	sp|O95379|TFIP8_HUMAN	TNFAIP8	Tumor necrosis factor alpha-induced protein 8 OS=Homo sapiens OX=9606 GN=TNFAIP8 PE=1 SV=1	8	5	6.03639	7.31923	7.3531	6.6036	5.90105	14.7114	16.1807	15.4226	10.5877	9.88428	6.77052	7.54098	8.63295	7.70718	7.5986	19.293	13.1695
sp|O95390|GDF11_HUMAN	O95390						12.836	13.357	12.4088	12.8613	10.6327						11.8652	8.01544	8.41418	8.18305	7.83959	12.3811	8.75155	1.41473	0.00393415	0.0206624		sp|O95390|GDF11_HUMAN	GDF11	Growth/differentiation factor 11 OS=Homo sapiens OX=9606 GN=GDF11 PE=1 SV=1	0	1	0	0	0	0	0	0	0	0	0	0	11.9113	12.099	11.5882	11.7145	9.44609	11.8233	7.8171
sp|O95391|SLU7_HUMAN	O95391	10.554	8.79821	10.852	6.61889	12.0936	15.5797	19.261	9.68822	6.56758	7.81599	11.2025	11.3949	10.3803	10.0242	12.0424	7.88571	9.65991	9.13222	9.79102	10.9714	10.1872	10.18	1.0007	0.980778	0.986877		sp|O95391|SLU7_HUMAN	SLU7	Pre-mRNA-splicing factor SLU7 OS=Homo sapiens OX=9606 GN=SLU7 PE=1 SV=2	1	2	9.69797	8.38688	10.5454	6.27404	11.704	10.9316	11.3949	10.1342	9.40008	11.5309	14.4574	17.447	9.0475	5.98199	6.94373	7.85783	9.42088
sp|O95394|AGM1_HUMAN	O95394	10.8771	9.46329	9.10453	10.7869	8.49028	7.82009	11.3448	10.6299	11.3139	11.2259	11.6625	12.1453	11.7694	12.117	7.64138	10.2414	12.9368	10.1279	10.1045	10.26	10.0277	10.7942	1.07644	0.261613	0.398135		sp|O95394|AGM1_HUMAN	PGM3	Phosphoacetylglucosamine mutase OS=Homo sapiens OX=9606 GN=PGM3 PE=1 SV=1	14	16	9.99482	9.02087	8.84727	10.2249	8.21675	11.3805	12.1453	11.4904	11.3625	7.31683	7.25675	10.2763	9.92687	10.3051	9.97311	10.2052	12.6167
sp|O95396|MOCS3_HUMAN	O95396	9.79797	9.53855	10.0945	10.1986	10.6741	9.00143	8.9404	13.2766	10.0928	10.6222	10.1025	11.1765	10.0338	11.3821	11.0633	8.44415	10.1333	11.3234	11.9217	12.2137	10.1638	10.7245	1.05517	0.289844	0.426604		sp|O95396|MOCS3_HUMAN	MOCS3	Adenylyltransferase and sulfurtransferase MOCS3 OS=Homo sapiens OX=9606 GN=MOCS3 PE=1 SV=1	6	6	9.00324	9.09261	9.80929	9.66725	10.3302	9.85821	11.1765	9.79595	10.6734	10.5934	8.35299	8.09838	12.3986	9.19288	9.43678	8.4143	9.88251
sp|O95400|CD2B2_HUMAN	O95400	11.5868	10.5972	11.0751	10.6818	10.2388	10.3523	11.528	11.375	11.6458	10.8861	9.27128	10.1897	10.0913	10.414	10.0263	8.71763	8.7446	11.2232	9.91297	11.8277	10.9855	9.99853	1.09871	0.013667	0.0483655		sp|O95400|CD2B2_HUMAN	CD2BP2	CD2 antigen cytoplasmic tail-binding protein 2 OS=Homo sapiens OX=9606 GN=CD2BP2 PE=1 SV=1	11	6	10.647	10.1018	10.7622	10.1253	9.90889	9.04707	10.1897	9.85203	9.76552	9.60046	9.60654	10.4423	10.6227	10.6074	9.67123	8.68681	8.52822
sp|O95405|ZFYV9_HUMAN	O95405	9.16451	10.7167	10.2053	10.5737	10.5598	6.45923	6.78973	8.07189	6.28602	6.18914	11.1786	10.8809	10.9759	9.41636	10.3067	29.1365	12.1376	11.3692	9.11894	8.70031	8.29448	11.5247	1.38944	0.0233404	0.0701042	3	sp|O95405|ZFYV9_HUMAN	ZFYVE9	Zinc finger FYVE domain-containing protein 9 OS=Homo sapiens OX=9606 GN=ZFYVE9 PE=1 SV=2	2	1	8.42116	10.2157	9.91693	10.0228	10.2196	10.9083	10.8809	10.7157	8.83004	9.86891	5.99392	6.15026	7.53806	5.72553	5.49844	29.0335	11.8373
sp|O95406|CNIH1_HUMAN	O95406						3.8815	5.15682	8.24927	8.92785	11.0463						8.17483	10.6985	11.0041	19.8932	18.4418	6.95588	12.8699	1.85021	0.0430607	0.108328		sp|O95406|CNIH1_HUMAN	CNIH1	Protein cornichon homolog 1 OS=Homo sapiens OX=9606 GN=CNIH1 PE=1 SV=1	0	2	0	0	0	0	0	0	0	0	0	0	3.60189	4.67114	7.70371	8.1318	9.81353	8.14593	10.4338
sp|O95415|BRI3_HUMAN	O95415						12.0914	12.2814	10.3721	10.2666	8.86506						11.4426	9.50159	9.99724	11.269	9.89277	10.6989	10.3916	1.02958	0.688664	0.780658		sp|O95415|BRI3_HUMAN	BRI3	Brain protein I3 OS=Homo sapiens OX=9606 GN=BRI3 PE=1 SV=1	0	3	0	0	0	0	0	0	0	0	0	0	11.2204	11.1247	9.68613	9.3512	7.87573	11.4021	9.26647
sp|O95425|SVIL_HUMAN	O95425	10.7549	8.11326	9.35041	11.0221	11.6167	10.6729	15.1504	9.93558	9.36235	14.5037	13.4384	7.77782	11.9328	8.54226	11.5459	9.38458	14.4546	7.13088	8.30414	7.60723	10.8586	9.71859	1.1173	0.290092	0.426722		sp|O95425|SVIL_HUMAN	SVIL	Supervillin OS=Homo sapiens OX=9606 GN=SVIL PE=1 SV=2	9	25	9.88259	7.73395	9.0862	10.4478	11.2424	13.1134	7.77782	11.6499	8.01037	11.0555	9.90401	13.7235	9.2785	8.52756	12.8851	9.3514	14.0969
sp|O95427|PIGN_HUMAN	O95427	12.0362	11.4566	10.605	11.6696	10.0362	6.98358	7.59866	10.4237	9.21574	9.49768	9.08623	10.3956	9.48426	9.84698	9.59143	11.0939	11.126	13.8938	12.1562	13.458	9.81445	10.903	1.11091	0.171167	0.294242		sp|O95427|PIGN_HUMAN	PIGN	GPI ethanolamine phosphate transferase 1 OS=Homo sapiens OX=9606 GN=PIGN PE=1 SV=1	4	1	11.0599	10.921	10.3053	11.0616	9.71282	8.8665	10.3956	9.2594	9.23385	9.18405	6.4805	6.883	9.7343	8.39402	8.43775	11.0547	10.8507
sp|O95428|PPN_HUMAN	O95428	11.9099	10.4371	11.1173	8.28042	12.6386						9.49746	10.7091	13.3919	7.75052	8.25474						10.7658	9.72853	1.10662	0.431663	0.564154		sp|O95428|PPN_HUMAN	PAPLN	Papilin OS=Homo sapiens OX=9606 GN=PAPLN PE=2 SV=4	2	0	10.9439	9.94911	10.8032	7.849	12.2314	9.26778	10.7091	13.0744	7.26793	7.90414	0	0	0	0	0	0	0
sp|O95429|BAG4_HUMAN	O95429						10.3101	8.30762	10.1212	9.19062	8.73036						12.7275	9.76954	10.202	12.5067	13.7136	9.29972	11.6821	1.25617	0.0195821	0.0621285		sp|O95429|BAG4_HUMAN	BAG4	BAG family molecular chaperone regulator 4 OS=Homo sapiens OX=9606 GN=BAG4 PE=1 SV=1	0	2	0	0	0	0	0	0	0	0	0	0	9.56736	7.52519	9.45189	8.37114	7.75606	12.6825	9.52779
sp|O95433|AHSA1_HUMAN	O95433	8.88017	8.88876	9.59779	9.23637	9.0076	10.9427	12.8537	10.3109	10.7418	10.6557	12.2989	10.9456	11.7159	11.3995	12.0027	10.8246	10.2557	10.3658	9.58456	9.58991	10.0454	10.8603	1.08113	0.114484	0.219518		sp|O95433|AHSA1_HUMAN	AHSA1	Activator of 90 kDa heat shock protein ATPase homolog 1 OS=Homo sapiens OX=9606 GN=AHSA1 PE=1 SV=1	22	20	8.15989	8.4732	9.32659	8.75514	8.7174	12.0015	10.9456	11.4381	10.6897	11.4929	10.1544	11.6431	9.62903	9.78401	9.46649	10.7863	10.0019
sp|O95450|ATS2_HUMAN	O95450	8.65696	5.50534	4.96054	7.74549	11.0929						17.9303	5.13708	15.1165	14.0323	13.941						7.27033	12.219	1.68067	0.0839273	0.176854		sp|O95450|ATS2_HUMAN	ADAMTS2	A disintegrin and metalloproteinase with thrombospondin motifs 2 OS=Homo sapiens OX=9606 GN=ADAMTS2 PE=2 SV=2	2	0	7.95478	5.24796	4.82037	7.34194	10.7355	17.4967	5.13708	14.7581	13.1586	13.3489	0	0	0	0	0	0	0
sp|O95453|PARN_HUMAN	O95453	9.11588	9.49906	10.301	8.57367	8.60601	13.0899	11.1877	11.7358	10.9661	9.16882	12.5846	13.6152	13.1841	8.96266	9.32751	10.6668	10.3304	10.4596	9.11255	9.32496	10.1295	10.6343	1.04983	0.479229	0.608741		sp|O95453|PARN_HUMAN	PARN	Poly(A)-specific ribonuclease PARN OS=Homo sapiens OX=9606 GN=PARN PE=1 SV=1	7	5	8.37648	9.05496	10.0099	8.12697	8.32875	12.2803	13.6152	12.8715	8.40459	8.93134	12.1469	10.134	10.9597	9.98831	8.14559	10.6291	10.0748
sp|O95455|TGDS_HUMAN	O95455						2.91226	5.33338	5.28559	4.8268	3.31187						9.6577	31.8068	11.2188	17.1156	12.6957	4.20351	14.9581	3.55849	0.000937467	0.00764961		sp|O95455|TGDS_HUMAN	TGDS	dTDP-D-glucose 4,6-dehydratase OS=Homo sapiens OX=9606 GN=TGDS PE=1 SV=1	0	4	0	0	0	0	0	0	0	0	0	0	2.70247	4.83107	4.93603	4.39642	2.94227	9.62356	31.0197
sp|O95456|PSMG1_HUMAN	O95456	8.12243	8.39238	8.90255	8.26873	8.45014	4.2489	5.39066	15.6661	15.9995	13.3586	13.6643	13.5197	13.8204	10.5963	10.012	2.9636	12.3181	12.5042	13.1774	10.7033	8.93745	10.5719	1.18287	0.395644	0.532638		sp|O95456|PSMG1_HUMAN	PSMG1	Proteasome assembly chaperone 1 OS=Homo sapiens OX=9606 GN=PSMG1 PE=1 SV=1	2	2	7.46361	8.00002	8.651	7.83792	8.1779	13.3339	13.5197	13.4927	9.93654	9.58673	3.94282	4.88296	14.63	14.5729	11.8678	2.95312	12.0133
sp|O95460|MATN4_HUMAN	O95460	5.70609	5.55774	5.48839	5.32977	9.97527	5.12069	41.4881	7.81994	7.27093	8.03913	33.9941	6.20555	6.62244	18.5319	6.47359	9.09581	7.67652	7.16103	6.8292	6.76955	7.85881	9.09532	1.15734	0.601019	0.714403		sp|O95460|MATN4_HUMAN	MATN4	Matrilin-4 OS=Homo sapiens OX=9606 GN=MATN4 PE=1 SV=3	7	9	5.24326	5.29791	5.33331	5.05208	9.65389	33.172	6.20555	6.46543	17.378	6.19864	4.75181	37.5807	7.30278	6.62262	7.14197	9.06365	7.48657
sp|O95461|LARG1_HUMAN	O95461	10.9227	10.4614	9.78622	13.8601	12.3786						6.42339	6.41917	7.1325	9.69144	17.3623						11.3919	8.68753	1.31129	0.215491	0.346472		sp|O95461|LARG1_HUMAN	LARGE1	LARGE xylosyl- and glucuronyltransferase 1 OS=Homo sapiens OX=9606 GN=LARGE1 PE=1 SV=1	1	0	10.0367	9.97232	9.5097	13.138	11.9798	6.26805	6.41917	6.9634	9.08799	16.6249	0	0	0	0	0	0	0
sp|O95470|SGPL1_HUMAN	O95470	12.3919	10.9253	12.4346	12.03	11.7391	18.1971	11.7585	9.9461	10.3953	11.7752	9.35272	8.33023	8.78949	8.78063	9.48235	7.39011	9.845	9.44469	9.42854	8.33628	12.0003	8.88888	1.35003	7.54589e-05	0.00163494	1	sp|O95470|SGPL1_HUMAN	SGPL1	Sphingosine-1-phosphate lyase 1 OS=Homo sapiens OX=9606 GN=SGPL1 PE=1 SV=3	3	1	11.3868	10.4145	12.0832	11.4032	11.3609	9.12654	8.33023	8.58111	8.2339	9.07961	16.8862	10.6511	9.28833	9.46837	10.4611	7.36398	9.60139
sp|O95477|ABCA1_HUMAN	O95477	14.224	10.0016	16.9683	15.3206	9.66295	10.3291	9.33389	8.28677	4.37885	5.58422	6.29482	7.65992	8.10182	8.57336	7.60393	19.2072	15.2268	10.657	12.3844	9.36549	9.64706	9.91766	1.02805	0.883428	0.923755		sp|O95477|ABCA1_HUMAN	ABCA1	Phospholipid-transporting ATPase ABCA1 OS=Homo sapiens OX=9606 GN=ABCA1 PE=1 SV=3	3	1	13.0703	9.53398	16.4888	14.5224	9.35164	6.14259	7.65992	7.90974	8.03953	7.28097	9.58501	8.45481	7.73873	3.98841	4.96103	19.1393	14.85
sp|O95478|NSA2_HUMAN	O95478						14.5423	13.2272	11.0142	15.5234	12.5071						2.53379	5.1577	9.1625	12.7744	10.6654	13.269	6.95844	1.9069	0.0604707	0.138227		sp|O95478|NSA2_HUMAN	NSA2	Ribosome biogenesis protein NSA2 homolog OS=Homo sapiens OX=9606 GN=NSA2 PE=1 SV=1	0	1	0	0	0	0	0	0	0	0	0	0	13.4947	11.9814	10.2858	14.1393	11.1113	2.52483	5.03007
[truncated: 6,735 more rows]
[truncated: 3 more columns]

## Sheet: PCA Scores
rownames.pca.res.componentScores.	PC1	PC2	PC3	PC4	PC5
SetA_126	-45.67	39.5681	7.41964	1.478	-10.0563
SetA_127n	-38.5378	26.267	5.20065	-0.615979	-14.6282
SetA_127c	-35.0745	29.382	6.99751	-11.3784	-2.63373
[truncated: 17 more rows]

## Sheet: PCA Loadings
rownames.ld.	PC1	PC2	PC3	PC4	PC5
[truncated: 6,349 more rows]

## Sheet: Sig. Diff. Exp. Proteins (DEP)
Accession	Uniprot	Gene.Symbol	Description	SetA_126	SetA_127n	SetA_127c	SetA_128n	SetA_128c	SetB_126	SetB_127n	SetB_127c	SetB_128n	SetB_128c	SetA_129n	SetA_129c	SetA_130n	SetA_130c	SetA_131	SetB_129n	SetB_129c	SetB_130n	SetB_130c	SetB_131	Means.CRISPR	Means.PSEN1	FC (PSEN1:CRISPR)	T-test p-value	Clusters	Protein.Id	Gene.Symbol	Description	SetA.Peptides	SetB.Peptides	SetA_126.1	SetA_127n.1	SetA_127c.1	SetA_128n.1	SetA_128c.1	SetA_129n.1	SetA_129c.1	SetA_130n.1	SetA_130c.1	SetA_131.1	SetB_126.1	SetB_127n.1	SetB_127c.1	SetB_128n.1	SetB_128c.1	SetB_129n.1
[truncated: 1,836 more rows]
[truncated: 4 more columns]

[truncated: 9 more sheets: AD-pathway proteins, GO Upregulated in PSEN1, KEGG Upregulated in PSEN1, DISEASE UP in PSEN1, GO Downregulated PSEN1, KEGG Downregulated in PSEN1, DISEASE Downregulated in PSEN1, GLOBAL DEP GO , GLOBAL DEP DISEASES]
