# Supplementary material for: Human iPSC-RPE with the PSEN1H163R pathogenic variant recapitulates Alzheimer’s disease features and reveals melanosome defects
Source: Research Square preprint supplement (doi:10.21203/rs.3.rs-6556064/v1), 2025-05-12
Supplement: Supplementary file 2 [file dca3d402cfbdb6e1445f129b.xlsx]

## Sheet: Parameters
Name	Description
Protein Id	Protein Id
Gene Symbol	Gene Symbol
Description	Description
Group ID	priotein group (shared peptides)
Number of peptides	Number of peptides
xxx_sn_scaled
	TMTscaled signal-to-noise
	Same data as above, but
	TMT values sum to 100
	for a given protein (scaled to 100)
xxx_sn_sum
	TMT summed signal-to-noise
	Sum of TMT S:N of all peptides
	for a given protein
Parameter	Cutoff
P value	0.05
Fold change	1.2
Clean	TRUE

## Sheet: FULL RESULTS
					CRISPR Isogenic Control				PSEN1 H163R pathogenic variant
Protein Id	Gene Symbol	Description	Group ID	Number of peptides	126_sn scaled	127c_sn scaled	128n_sn scaled	128c_sn scaled	129n_sn scaled	129c_sn scaled	130n_sn scaled	130c_sn scaled	Mean CRISPR	Mean PSEN1	FC (PSEN:CRISPR)	p-value (t-test)
sp|Q12860|CNTN1_HUMAN	CNTN1	Contactin-1 OS=Homo sapiens OX=9606 GN=CNTN1 PE=1 SV=1	85	17	9.29024	7.60862	8.78966	8.37394	13.9491	13.1722	14.068	11.985	8.49295	13.2669	1.5621	0.000202672
sp|Q99969|RARR2_HUMAN	RARRES2	Retinoic acid receptor responder protein 2 OS=Homo sapiens OX=9606 GN=RARRES2 PE=1 SV=1	281	1	9.13783	4.00209	8.61685	6.10587	19.3196	16.3061	15.7604	16.0111	6.62303	16.7913	2.53529	0.000490208
sp|Q02809|PLOD1_HUMAN	PLOD1	Procollagen-lysine,2-oxoglutarate 5-dioxygenase 1 OS=Homo sapiens OX=9606 GN=PLOD1 PE=1 SV=2	140	2	8.67456	5.95547	6.1567	5.85222	15.1538	13.9017	17.2605	12.494	6.56838	14.5994	2.22269	0.000573541
sp|O15230|LAMA5_HUMAN	LAMA5	Laminin subunit alpha-5 OS=Homo sapiens OX=9606 GN=LAMA5 PE=1 SV=8	129	2	9.50963	6.22922	8.58196	5.87112	12.9919	13.5944	16.0781	15.0085	7.39139	14.3682	1.9439	0.000893934
sp|O43827|ANGL7_HUMAN	ANGPTL7	Angiopoietin-related protein 7 OS=Homo sapiens OX=9606 GN=ANGPTL7 PE=1 SV=1	551	6	8.51394	5.96954	9.53688	6.62224	13.9008	14.3626	12.8821	14.8823	7.52698	13.9873	1.85828	0.000483164
sp|P01033|TIMP1_HUMAN	TIMP1	Metalloproteinase inhibitor 1 OS=Homo sapiens OX=9606 GN=TIMP1 PE=1 SV=1	320	9	7.92117	6.34024	5.65652	4.86557	11.9878	9.99043	13.1882	14.1549	6.0974	12.228	2.00544	0.0014601
sp|O00560|SDCB1_HUMAN	SDCBP	Syntenin-1 OS=Homo sapiens OX=9606 GN=SDCBP PE=1 SV=1	127	1	9.49404	5.4416	5.86686	5.86824	18.0205	20.717	17.6755	13.2419	6.49416	17.1931	2.64747	0.00103374
sp|Q10471|GALT2_HUMAN	GALNT2	Polypeptide N-acetylgalactosaminyltransferase 2 OS=Homo sapiens OX=9606 GN=GALNT2 PE=1 SV=1	308	1	8.23129	7.239	9.65776	8.88573	14.6976	12.4627	12.072	15.0788	8.45627	13.513	1.59798	0.00149778
sp|P02649|APOE_HUMAN	APOE	Apolipoprotein E OS=Homo sapiens OX=9606 GN=APOE PE=1 SV=1	111	26	9.84496	7.2567	8.45781	6.75282	14.1892	13.6041	13.2255	13.6077	7.99234	13.6523	1.70817	0.000237647
sp|P09871|C1S_HUMAN	C1S	Complement C1s subcomponent OS=Homo sapiens OX=9606 GN=C1S PE=1 SV=1	208	21	9.32259	8.17198	7.00877	6.30869	15.7698	13.4993	11.1847	13.9481	7.61836	13.4995	1.77198	0.00218545
sp|P36955|PEDF_HUMAN	SERPINF1	Pigment epithelium-derived factor OS=Homo sapiens OX=9606 GN=SERPINF1 PE=1 SV=4	70	56	8.84492	7.09112	5.84978	6.02634	14.8678	17.0826	11.2489	15.4662	6.85726	14.4985	2.11433	0.0015597
sp|P07585|PGS2_HUMAN	DCN	Decorin OS=Homo sapiens OX=9606 GN=DCN PE=1 SV=1	411	3	7.2578	6.48895	6.99592	5.43797	12.5544	10.0705	14.1323	13.8578	6.50602	12.5441	1.92807	0.000928447
sp|P16035|TIMP2_HUMAN	TIMP2	Metalloproteinase inhibitor 2 OS=Homo sapiens OX=9606 GN=TIMP2 PE=1 SV=2	176	8	9.58353	6.93958	5.45133	5.70319	18.0221	11.7849	13.6518	15.1937	6.74326	14.4876	2.14846	0.00308907
sp|P07942|LAMB1_HUMAN	LAMB1	Laminin subunit beta-1 OS=Homo sapiens OX=9606 GN=LAMB1 PE=1 SV=2	203	9	8.69033	7.95461	9.19323	9.19667	11.129	10.4833	12.2662	12.5644	8.74356	11.5798	1.32438	0.00240543
sp|Q9UBP4|DKK3_HUMAN	DKK3	Dickkopf-related protein 3 OS=Homo sapiens OX=9606 GN=DKK3 PE=1 SV=2	599	1	7.00514	6.22309	8.20125	10.1466	11.8068	12.7473	13.5171	13.521	7.76079	12.8784	1.65941	0.00184647
sp|P08727|K1C19_HUMAN_contaminant	KRT19	Keratin, type I cytoskeletal 19 OS=Homo sapiens GN=KRT19 PE=1 SV=4	37	3	15.5867	11.8174	17.6088	13.2852	5.29258	8.78444	7.56364	8.19536	14.4077	7.3269	0.508542	0.00303679
sp|P00450|CERU_HUMAN	CP	Ceruloplasmin OS=Homo sapiens OX=9606 GN=CP PE=1 SV=1	222	12	8.9451	7.84561	9.51387	9.46024	12.7239	12.0512	10.8936	13.8605	8.91493	12.3353	1.38367	0.00331713
sp|O94985|CSTN1_HUMAN	CLSTN1	Calsyntenin-1 OS=Homo sapiens OX=9606 GN=CLSTN1 PE=1 SV=1	23	12	9.16758	4.56592	7.65709	4.86548	16.2271	17.2687	17.0904	10.5404	6.2841	14.9892	2.38525	0.00419366
sp|P31146|COR1A_HUMAN	CORO1A	Coronin-1A OS=Homo sapiens OX=9606 GN=CORO1A PE=1 SV=4	482	1	9.58428	12.7498	11.4163	13.0173	6.38608	6.29855	6.4359	7.10634	11.6085	6.54911	0.564164	0.000704881
sp|P35542|SAA4_HUMAN	SAA4	Serum amyloid A-4 protein OS=Homo sapiens OX=9606 GN=SAA4 PE=1 SV=2	419	1	11.4612	12.0457	10.8981	13.5197	8.66311	8.1987	9.93097	6.77904	11.9425	8.31562	1.43615	0.00589449
sp|P05787|K2C8_HUMAN_contaminant	KRT8	Keratin, type II cytoskeletal 8 OS=Homo sapiens GN=KRT8 PE=1 SV=7	316	9	16.1631	11.6206	14.0582	15.4999	6.8512	11.3895	6.60136	7.87598	14.2234	7.98091	0.561112	0.00621864
sp|P24821|TENA_HUMAN	TNC	Tenascin OS=Homo sapiens OX=9606 GN=TNC PE=1 SV=3	494	3	10.0177	7.31227	8.34177	6.87824	10.7405	11.3091	13.9477	12.7	8.05173	12.1113	1.50418	0.00691765
sp|Q9H4D0|CSTN2_HUMAN	CLSTN2	Calsyntenin-2 OS=Homo sapiens OX=9606 GN=CLSTN2 PE=1 SV=2	180	1	10.279	3.3491	8.14153	2.99998	16.0479	21.4166	18.7568	11.7505	5.38488	16.59	3.08085	0.0075593
sp|Q14112|NID2_HUMAN	NID2	Nidogen-2 OS=Homo sapiens OX=9606 GN=NID2 PE=1 SV=3	306	4	9.21882	4.77288	5.70565	5.2418	14.8977	11.7706	15.3774	20.7419	6.02297	15.3784	2.5533	0.00426497
sp|P35556|FBN2_HUMAN	FBN2	Fibrillin-2 OS=Homo sapiens OX=9606 GN=FBN2 PE=1 SV=3	144	8	8.69857	7.82048	10.4848	8.31026	11.3211	11.6515	11.0313	13.2924	8.77433	11.793	1.34404	0.00806691
sp|F8WCM5|INSR2_HUMAN	INS-IGF2	Insulin, isoform 2 OS=Homo sapiens OX=9606 GN=INS-IGF2 PE=2 SV=1	399	2	10.6462	12.4967	13.2254	15.327	7.06365	10.3564	6.84482	7.73461	12.8149	7.88878	0.615596	0.00792955
sp|O00391|QSOX1_HUMAN	QSOX1	Sulfhydryl oxidase 1 OS=Homo sapiens OX=9606 GN=QSOX1 PE=1 SV=3	84	14	9.15297	7.36708	6.79156	6.97749	15.5953	14.2084	12.7613	10.3641	7.51851	13.084	1.74024	0.00385151
sp|P22352|GPX3_HUMAN	GPX3	Glutathione peroxidase 3 OS=Homo sapiens OX=9606 GN=GPX3 PE=1 SV=2	369	3	11.2396	11.8757	11.8003	12.4744	9.51798	8.2017	8.36362	6.10057	11.8394	7.94426	0.671	0.00236978
sp|P40123|CAP2_HUMAN	CAP2	Adenylyl cyclase-associated protein 2 OS=Homo sapiens OX=9606 GN=CAP2 PE=1 SV=1	486	1	10.3838	13.1894	11.9831	12.3881	8.14495	9.87348	7.34107	5.65121	11.9409	7.60002	0.636467	0.00708617
sp|Q12841|FSTL1_HUMAN	FSTL1	Follistatin-related protein 1 OS=Homo sapiens OX=9606 GN=FSTL1 PE=1 SV=1	190	14	7.68091	5.75686	6.92827	6.20462	14.6637	12.6792	13.6577	19.8016	6.6029	14.9745	2.26787	0.00198832
sp|P11166|GTR1_HUMAN	SLC2A1	Solute carrier family 2, facilitated glucose transporter member 1 OS=Homo sapiens OX=9606 GN=SLC2A1 PE=1 SV=2	433	1	9.54273	4.93622	7.41195	5.42487	16.2515	19.4238	16.7982	10.5299	6.59701	15.3719	2.33014	0.00598405
sp|Q14766|LTBP1_HUMAN	LTBP1	Latent-transforming growth factor beta-binding protein 1 OS=Homo sapiens OX=9606 GN=LTBP1 PE=1 SV=4	147	2	9.13071	6.33641	6.36686	7.89093	12.6898	9.13959	13.522	13.5644	7.34261	12.0769	1.64477	0.0084681
sp|Q9BRK5|CAB45_HUMAN	SDF4	45 kDa calcium-binding protein OS=Homo sapiens OX=9606 GN=SDF4 PE=1 SV=1	544	1	9.39789	6.93734	5.83527	6.55443	16.098	13.8956	10.969	19.0711	7.06651	14.7078	2.08134	0.00592599
sp|P11047|LAMC1_HUMAN	LAMC1	Laminin subunit gamma-1 OS=Homo sapiens OX=9606 GN=LAMC1 PE=1 SV=3	235	6	9.87609	7.33704	10.0347	8.43116	11.655	12.2951	12.2564	11.2171	8.8486	11.8474	1.3389	0.00532678
sp|P02751|FINC_HUMAN	FN1	Fibronectin OS=Homo sapiens OX=9606 GN=FN1 PE=1 SV=5	134	73	10.1936	7.04868	7.4668	7.65029	11.0913	10.5762	13.9916	11.1066	8.00409	11.6196	1.4517	0.014188
sp|O95967|FBLN4_HUMAN	EFEMP2	EGF-containing fibulin-like extracellular matrix protein 2 OS=Homo sapiens OX=9606 GN=EFEMP2 PE=1 SV=3	77	7	9.25372	8.03042	8.66386	8.64314	13.106	10.113	11.0594	11.5858	8.63693	11.4157	1.32173	0.00579739
sp|P37802|TAGL2_HUMAN	TAGLN2	Transgelin-2 OS=Homo sapiens OX=9606 GN=TAGLN2 PE=1 SV=3	224	5	9.77211	12.2793	11.7572	15.3796	5.67544	8.86039	7.44323	7.11171	12.1368	7.18285	0.591826	0.00927178
sp|P69905|HBA_HUMAN	HBA1	Hemoglobin subunit alpha OS=Homo sapiens OX=9606 GN=HBA1 PE=1 SV=2	366	19	11.0558	11.6892	12.3614	14.709	5.63515	7.17801	6.61078	10.8415	12.381	7.33775	0.592661	0.0125401
sp|O00339|MATN2_HUMAN	MATN2	Matrilin-2 OS=Homo sapiens OX=9606 GN=MATN2 PE=1 SV=4	89	4	9.80851	5.8704	10.2864	8.32832	12.7429	12.6279	14.0038	13.173	8.38056	13.126	1.56624	0.00464002
sp|P00734|THRB_HUMAN	F2	Prothrombin OS=Homo sapiens OX=9606 GN=F2 PE=1 SV=2	394	26	10.0998	10.7208	10.5508	11.7336	10.1685	8.47069	8.21233	8.538	10.76	8.81555	0.819286	0.0141216
sp|P22735|TGM1_HUMAN_contaminant	TGM1	Protein-glutamine gamma-glutamyltransferase K OS=Homo sapiens GN=TGM1 PE=1 SV=4	166	3	12.0136	11.3015	12.4289	10.949	7.27933	10.3726	9.37267	8.09271	11.6588	8.6993	0.746157	0.00897334
sp|P08603|CFAH_HUMAN	CFH	Complement factor H OS=Homo sapiens OX=9606 GN=CFH PE=1 SV=4	183	25	10.6091	8.37031	8.3456	5.68282	16.5946	13.7728	12.1732	11.1339	8.05583	13.2666	1.64683	0.0161189
sp|O00468|AGRIN_HUMAN	AGRN	Agrin OS=Homo sapiens OX=9606 GN=AGRN PE=1 SV=6	97	2	8.8502	8.65316	7.69121	8.61705	14.2002	11.5409	10.8149	14.7378	8.44054	12.713	1.50618	0.00475771
sp|Q9H4B7|TBB1_HUMAN	TUBB1	Tubulin beta-1 chain OS=Homo sapiens OX=9606 GN=TUBB1 PE=1 SV=1	172	3	11.0387	11.8267	10.8274	12.9678	9.86044	8.81903	7.53071	5.73459	11.6357	7.82823	0.672777	0.0109169
sp|Q02413|DSG1_HUMAN_contaminant	DSG1	Desmoglein-1 OS=Homo sapiens GN=DSG1 PE=1 SV=2	47	3	13.5261	11.1	12.4774	9.85726	7.4204	8.74265	9.68746	7.9332	11.6572	8.40296	0.720839	0.0128304
tr|C9J2H1|C9J2H1_HUMAN	ITIH5	Inter-alpha-trypsin inhibitor heavy chain H5 OS=Homo sapiens OX=9606 GN=ITIH5 PE=1 SV=2	131	4	8.93765	4.84325	10.3675	5.29314	14.1422	14.9044	10.1564	18.544	6.98131	14.1154	2.02189	0.0179356
sp|O76061|STC2_HUMAN	STC2	Stanniocalcin-2 OS=Homo sapiens OX=9606 GN=STC2 PE=1 SV=1	657	1	6.27477	6.09909	6.59142	6.94192	19.5741	17.456	16.2804	10.0199	6.4689	15.3652	2.37524	0.00394717
sp|Q12805|FBLN3_HUMAN	EFEMP1	EGF-containing fibulin-like extracellular matrix protein 1 OS=Homo sapiens OX=9606 GN=EFEMP1 PE=1 SV=2	42	19	11.3534	7.42001	8.63204	7.4962	14.5097	12.3779	11.2656	11.6567	8.59253	12.3925	1.44224	0.0189036
sp|P61224|RAP1B_HUMAN	RAP1B	Ras-related protein Rap-1b OS=Homo sapiens OX=9606 GN=RAP1B PE=1 SV=1	560	3	8.94788	9.86031	9.38818	10.4902	8.95974	8.45076	8.21031	7.79165	9.65482	8.34248	0.864074	0.0183364
sp|Q9Y490|TLN1_HUMAN	TLN1	Talin-1 OS=Homo sapiens OX=9606 GN=TLN1 PE=1 SV=3	9	21	9.30514	10.3914	11.6857	12.9442	7.75242	8.93499	8.45099	6.97115	10.9972	7.99256	0.726782	0.0144255
sp|Q9Y5F9|PCDGI_HUMAN	PCDHGB6	Protocadherin gamma-B6 OS=Homo sapiens OX=9606 GN=PCDHGB6 PE=2 SV=1	53	2	9.83087	9.79455	8.37998	7.71406	14.1311	12.6958	9.81552	13.4443	8.8823	12.4043	1.39652	0.016216
sp|P09486|SPRC_HUMAN	SPARC	SPARC OS=Homo sapiens OX=9606 GN=SPARC PE=1 SV=1	128	33	7.00759	5.33703	8.04778	5.71365	15.514	8.72554	16.9206	17.8765	6.43968	14.225	2.20897	0.00884831
sp|P50552|VASP_HUMAN	VASP	Vasodilator-stimulated phosphoprotein OS=Homo sapiens OX=9606 GN=VASP PE=1 SV=3	507	1	11.2221	13.6544	10.6418	13.0148	10.9019	7.65326	7.401	9.42611	12.0698	8.7346	0.723674	0.02339
sp|P98160|PGBM_HUMAN	HSPG2	Basement membrane-specific heparan sulfate proteoglycan core protein OS=Homo sapiens OX=9606 GN=HSPG2 PE=1 SV=4	10	10	9.2755	7.4545	9.20666	8.6198	10.0068	10.1774	10.9543	12.6733	8.60674	10.9044	1.26696	0.0205055
sp|Q08380|LG3BP_HUMAN	LGALS3BP	Galectin-3-binding protein OS=Homo sapiens OX=9606 GN=LGALS3BP PE=1 SV=1	7	20	9.78765	5.53403	7.84904	5.66245	17.6473	20.2273	13.7411	10.2302	7.00463	14.9669	2.13671	0.0142247
sp|Q6ZVX7|FBX50_HUMAN	NCCRP1	F-box only protein 50 OS=Homo sapiens OX=9606 GN=NCCRP1 PE=1 SV=1	678	1	10.2358	11.5949	9.87636	11.1551	9.56296	9.35897	7.31611	8.82776	10.6934	8.71942	0.815404	0.0233535
sp|P00736|C1R_HUMAN	C1R	Complement C1r subcomponent OS=Homo sapiens OX=9606 GN=C1R PE=1 SV=2	204	25	10.305	6.29342	8.39081	6.27637	18.0753	15.9977	13.2771	9.90253	7.64472	13.9636	1.82657	0.0180492
sp|P01009|A1AT_HUMAN	SERPINA1	Alpha-1-antitrypsin OS=Homo sapiens OX=9606 GN=SERPINA1 PE=1 SV=3	171	7	8.69738	6.44083	6.90509	7.75238	14.7385	20.9162	11.5843	13.6407	7.40003	14.8563	2.0076	0.00943747
sp|P14923|PLAK_HUMAN_contaminant	JUP	Junction plakoglobin OS=Homo sapiens GN=JUP PE=1 SV=3	18	9	13.4466	12.3882	13.1822	9.69688	7.12831	10.8635	9.12667	8.06603	12.0798	8.68925	0.71932	0.0279448
sp|P07203|GPX1_HUMAN	GPX1	Glutathione peroxidase 1 OS=Homo sapiens OX=9606 GN=GPX1 PE=1 SV=4	691	1	10.0476	12.7231	9.2378	12.3092	8.31505	8.509	8.531	6.81101	10.9803	8.00735	0.729248	0.0182618
sp|P22303|ACES_HUMAN	ACHE	Acetylcholinesterase OS=Homo sapiens OX=9606 GN=ACHE PE=1 SV=1	541	2	9.74384	10.4583	10.1115	11.4852	9.24018	8.96913	8.72954	9.48293	10.43	9.10104	0.872579	0.01665
sp|Q96PD2|DCBD2_HUMAN	DCBLD2	Discoidin, CUB and LCCL domain-containing protein 2 OS=Homo sapiens OX=9606 GN=DCBLD2 PE=1 SV=1	663	1	9.22054	10.1906	8.75286	8.10937	13.1094	14.8099	10.3615	11.589	9.03698	12.3567	1.36734	0.018235
sp|P35555|FBN1_HUMAN	FBN1	Fibrillin-1 OS=Homo sapiens OX=9606 GN=FBN1 PE=1 SV=4	144	11	8.18754	6.84754	7.94032	6.88535	13.0651	10.1062	13.2245	18.1445	7.44069	13.3415	1.79305	0.0110195
sp|P00558|PGK1_HUMAN	PGK1	Phosphoglycerate kinase 1 OS=Homo sapiens OX=9606 GN=PGK1 PE=1 SV=3	28	13	12.7787	11.9127	10.2087	12.6339	7.12518	10.5559	9.24088	5.67219	11.8373	7.9239	0.669403	0.0233576
sp|B9A064|IGLL5_HUMAN	IGLL5	Immunoglobulin lambda-like polypeptide 5 OS=Homo sapiens OX=9606 GN=IGLL5 PE=2 SV=2	672	2	10.2781	11.6115	11.6175	13.3862	10.3317	9.13502	10.0627	7.46007	11.6719	9.17455	0.786035	0.0345289
sp|P08572|CO4A2_HUMAN	COL4A2	Collagen alpha-2(IV) chain OS=Homo sapiens OX=9606 GN=COL4A2 PE=1 SV=4	160	2	8.60802	8.35101	8.39723	8.13402	16.1169	11.8962	12.7499	10.3831	8.37088	12.6221	1.50786	0.0110087
sp|P25311|ZA2G_HUMAN	AZGP1	Zinc-alpha-2-glycoprotein OS=Homo sapiens OX=9606 GN=AZGP1 PE=1 SV=2	689	1	13.5859	11.2826	14.8752	10.9585	6.67335	7.63714	11.689	9.056	12.5727	8.57032	0.681662	0.034691
sp|P01344|IGF2_HUMAN	IGF2	Insulin-like growth factor II OS=Homo sapiens OX=9606 GN=IGF2 PE=1 SV=1	409	3	12.201	10.232	10.1363	10.8876	10.3715	9.05115	7.88587	8.15007	10.8341	8.81331	0.813481	0.0347003
sp|Q9HCB6|SPON1_HUMAN	SPON1	Spondin-1 OS=Homo sapiens OX=9606 GN=SPON1 PE=1 SV=2	20	2	7.22317	5.87459	7.77102	7.55745	12.436	10.3502	16.4276	20.3724	7.06545	14.4066	2.03902	0.0136554
sp|Q10472|GALT1_HUMAN	GALNT1	Polypeptide N-acetylgalactosaminyltransferase 1 OS=Homo sapiens OX=9606 GN=GALNT1 PE=1 SV=1	596	1	8.79799	9.17979	8.04757	8.28256	14.085	13.0866	9.4666	15.5087	8.56567	12.8259	1.49736	0.0146293
sp|Q05707|COEA1_HUMAN	COL14A1	Collagen alpha-1(XIV) chain OS=Homo sapiens OX=9606 GN=COL14A1 PE=1 SV=3	542	5	8.76436	7.33017	9.86394	6.43763	10.2073	11.6717	11.9979	9.1857	7.99195	10.7045	1.33941	0.0375046
sp|P00488|F13A_HUMAN	F13A1	Coagulation factor XIII A chain OS=Homo sapiens OX=9606 GN=F13A1 PE=1 SV=4	201	3	9.46509	11.6858	12.2417	10.521	8.37026	9.66574	8.67201	5.5646	10.925	7.90464	0.723538	0.0352557
sp|P29966|MARCS_HUMAN	MARCKS	Myristoylated alanine-rich C-kinase substrate OS=Homo sapiens OX=9606 GN=MARCKS PE=1 SV=4	554	1	10.0628	5.49918	6.80502	6.66251	13.188	11.4477	9.06706	17.0145	7.07736	12.3537	1.74552	0.0313455
sp|P11717|MPRI_HUMAN	IGF2R	Cation-independent mannose-6-phosphate receptor OS=Homo sapiens OX=9606 GN=IGF2R PE=1 SV=3	71	7	10.235	11.9294	11.1209	11.8208	10.3572	9.85561	8.63417	7.20542	11.2557	8.92692	0.7931	0.0305623
sp|O60462|NRP2_HUMAN	NRP2	Neuropilin-2 OS=Homo sapiens OX=9606 GN=NRP2 PE=1 SV=3	234	3	11.0388	13.1712	10.7472	11.5667	10.9693	9.52138	9.27894	7.64471	11.5948	9.27758	0.80015	0.0396312
sp|P31944|CASPE_HUMAN_contaminant	CASP14	Caspase-14 OS=Homo sapiens GN=CASP14 PE=1 SV=2	305	2	12.1525	9.57366	12.4962	12.948	8.35246	8.87979	11.2028	7.72597	11.7133	8.95105	0.764175	0.0424565
sp|P07996|TSP1_HUMAN	THBS1	Thrombospondin-1 OS=Homo sapiens OX=9606 GN=THBS1 PE=1 SV=2	80	58	11.0623	12.5712	11.4995	13.1006	10.4071	7.74301	10.8157	6.70539	12.0309	8.74338	0.726744	0.0298449
sp|P05067|A4_HUMAN	APP	Amyloid-beta precursor protein OS=Homo sapiens OX=9606 GN=APP PE=1 SV=3	205	5	6.42422	5.15729	8.94619	9.37616	12.5325	14.7711	20.1946	9.61499	7.26066	13.7692	1.89641	0.0323634
sp|P02787|TRFE_HUMAN	TF	Serotransferrin OS=Homo sapiens OX=9606 GN=TF PE=1 SV=3	43	152	10.2841	11.1057	9.68475	10.8986	10.2322	7.07304	8.62858	7.7066	10.4783	8.32903	0.79488	0.0333022
sp|Q8WWZ8|OIT3_HUMAN	OIT3	Oncoprotein-induced transcript 3 protein OS=Homo sapiens OX=9606 GN=OIT3 PE=1 SV=2	448	2	9.51114	10.6572	10.702	10.6077	10.315	7.61145	7.01639	7.17488	10.3572	7.92896	0.765554	0.0295314
sp|P04259|K2C6B_HUMAN_contaminant	KRT6B	Keratin, type II cytoskeletal 6B OS=Homo sapiens GN=KRT6B PE=1 SV=5	316	17	14.4544	12.5265	14.1873	11.0209	4.8342	11.6843	9.86419	4.97855	12.9714	7.25726	0.559482	0.0343302
sp|P03951|FA11_HUMAN	F11	Coagulation factor XI OS=Homo sapiens OX=9606 GN=F11 PE=1 SV=1	243	5	9.9329	11.78	10.9547	13.2065	10.4076	8.77995	9.2997	6.20611	11.4065	8.52183	1.3385	0.050197
sp|Q99435|NELL2_HUMAN	NELL2	Protein kinase C-binding protein NELL2 OS=Homo sapiens OX=9606 GN=NELL2 PE=1 SV=1	115	4	8.20722	8.44372	7.31823	7.50118	10.4025	9.67347	8.48805	12.1596	7.85356	10.0951	0.777955	0.0508294
sp|P07093|GDN_HUMAN	SERPINE2	Glia-derived nexin OS=Homo sapiens OX=9606 GN=SERPINE2 PE=1 SV=1	241	1	6.50084	4.48589	3.52791	3.06082	7.52237	7.71406	12.7788	6.43085	4.21253	8.30996	0.506926	0.0510778
sp|Q15555|MARE2_HUMAN	MAPRE2	Microtubule-associated protein RP/EB family member 2 OS=Homo sapiens OX=9606 GN=MAPRE2 PE=1 SV=1	520	1	9.19691	10.9018	12.2336	16.2414	7.69901	8.98672	8.54736	5.52328	11.8804	7.5599	1.5715	0.05129
sp|P55285|CADH6_HUMAN	CDH6	Cadherin-6 OS=Homo sapiens OX=9606 GN=CDH6 PE=1 SV=1	371	6	8.61651	9.36438	8.21437	10.2828	10.9908	9.69215	10.2512	11.1805	9.08603	10.5117	0.864376	0.0513658
sp|P08253|MMP2_HUMAN	MMP2	72 kDa type IV collagenase OS=Homo sapiens OX=9606 GN=MMP2 PE=1 SV=2	62	16	9.19866	8.69336	8.59425	8.8012	12.525	11.5451	11.8163	8.96135	8.81892	11.1239	0.79279	0.0524444
sp|P26022|PTX3_HUMAN	PTX3	Pentraxin-related protein PTX3 OS=Homo sapiens OX=9606 GN=PTX3 PE=1 SV=3	38	2	8.94064	6.10154	5.79077	7.56747	10.0426	13.1364	8.18723	15.0357	6.99236	11.2887	0.61941	0.0530519
sp|P05783|K1C18_HUMAN_contaminant	KRT18	Keratin, type I cytoskeletal 18 OS=Homo sapiens GN=KRT18 PE=1 SV=2	37	5	17.545	9.10984	13.4858	15.1677	6.94846	10.8721	6.583	9.94122	13.4467	8.38526	1.60361	0.0536985
sp|P0C0L5|CO4B_HUMAN	C4B	Complement C4-B OS=Homo sapiens OX=9606 GN=C4B PE=1 SV=2	2	1	8.92208	5.87331	6.29323	7.05987	19.3388	14.9696	12.7418	8.31895	6.94632	13.2353	0.524832	0.0542718
sp|P60709|ACTB_HUMAN	ACTB	Actin, cytoplasmic 1 OS=Homo sapiens OX=9606 GN=ACTB PE=1 SV=1	69	18	10.2945	11.2593	10.5419	10.7845	8.8086	10.7274	8.77614	8.34348	10.7142	9.12038	1.17475	0.0543012
sp|Q16270|IBP7_HUMAN	IGFBP7	Insulin-like growth factor-binding protein 7 OS=Homo sapiens OX=9606 GN=IGFBP7 PE=1 SV=1	66	16	7.60004	4.35066	7.21604	4.0649	15.3296	8.16814	14.0359	23.7353	5.58059	14.2913	0.390488	0.0545002
sp|P23284|PPIB_HUMAN	PPIB	Peptidyl-prolyl cis-trans isomerase B OS=Homo sapiens OX=9606 GN=PPIB PE=1 SV=2	231	8	9.7943	7.42834	9.75706	8.3278	9.70879	11.7636	10.2008	13.2231	8.76857	11.1408	0.787065	0.0548159
sp|P39060|COIA1_HUMAN	COL18A1	Collagen alpha-1(XVIII) chain OS=Homo sapiens OX=9606 GN=COL18A1 PE=1 SV=5	26	6	11.7666	8.30798	7.21473	6.44886	16.9348	12.0665	9.47921	14.1928	8.21225	12.8766	0.637767	0.0566273
sp|Q7Z7M0|MEGF8_HUMAN	MEGF8	Multiple epidermal growth factor-like domains protein 8 OS=Homo sapiens OX=9606 GN=MEGF8 PE=1 SV=2	636	1	8.0594	9.04529	7.90207	9.25103	13.3241	13.9441	9.94411	9.78758	8.54406	11.5962	0.736795	0.0567329
sp|Q14126|DSG2_HUMAN	DSG2	Desmoglein-2 OS=Homo sapiens OX=9606 GN=DSG2 PE=1 SV=2	518	1	7.68347	7.56747	7.83006	5.98363	13.0648	9.42616	16.6964	9.69962	7.22453	11.8838	0.607933	0.0582455
sp|P55209|NP1L1_HUMAN	NAP1L1	Nucleosome assembly protein 1-like 1 OS=Homo sapiens OX=9606 GN=NAP1L1 PE=1 SV=1	387	2	10.6154	9.88015	11.9824	13.5255	8.00177	9.79399	9.57011	9.50899	11.4182	9.18966	1.24251	0.0582732
sp|P02786|TFR1_HUMAN	TFRC	Transferrin receptor protein 1 OS=Homo sapiens OX=9606 GN=TFRC PE=1 SV=2	24	2	8.57471	10.6018	10.263	11.3245	8.85161	8.73345	8.97818	6.50354	10.1385	8.19665	1.23691	0.0593455
sp|Q8TEU8|WFKN2_HUMAN	WFIKKN2	WAP, Kazal, immunoglobulin, Kunitz and NTR domain-containing protein 2 OS=Homo sapiens OX=9606 GN=WFIKKN2 PE=1 SV=1	196	4	8.13972	6.28178	7.81184	12.1162	10.553	19.158	12.2561	13.819	8.34071	13.6031	0.613146	0.0597916
sp|P04114|APOB_HUMAN	APOB	Apolipoprotein B-100 OS=Homo sapiens OX=9606 GN=APOB PE=1 SV=2	13	19	9.65144	12.3092	11.8583	13.0378	9.9178	9.16308	9.98297	5.48888	11.6416	8.4004	1.38584	0.0601601
sp|P05155|IC1_HUMAN	SERPING1	Plasma protease C1 inhibitor OS=Homo sapiens OX=9606 GN=SERPING1 PE=1 SV=2	232	5	10.4375	6.81626	9.01461	7.42085	17.3875	15.7919	13.4654	8.54305	8.30588	13.3314	0.623031	0.0614995
sp|P43251|BTD_HUMAN	BTD	Biotinidase OS=Homo sapiens OX=9606 GN=BTD PE=1 SV=2	396	2	6.74846	8.17592	8.2258	9.9637	8.82856	12.9922	10.0689	12.0026	8.2004	10.8507	0.755749	0.0617866
sp|P06865|HEXA_HUMAN	HEXA	Beta-hexosaminidase subunit alpha OS=Homo sapiens OX=9606 GN=HEXA PE=1 SV=2	110	3	7.92645	8.81076	8.92713	8.10046	11.7252	13.2832	9.99886	9.15541	8.43002	10.9273	0.771464	0.0618675
sp|P02452|CO1A1_HUMAN	COL1A1	Collagen alpha-1(I) chain OS=Homo sapiens OX=9606 GN=COL1A1 PE=1 SV=5	109	31	8.97467	6.32115	6.81496	7.47496	9.66421	8.53476	12.3252	14.915	7.33199	11.0967	0.660736	0.0623139
sp|P02790|HEMO_HUMAN	HPX	Hemopexin OS=Homo sapiens OX=9606 GN=HPX PE=1 SV=2	408	1	13.3315	11.2144	13.3074	14.2886	13.0542	6.48382	7.24369	4.02878	12.9848	7.04983	1.84186	0.0625728
sp|P05546|HEP2_HUMAN	SERPIND1	Heparin cofactor 2 OS=Homo sapiens OX=9606 GN=SERPIND1 PE=1 SV=3	376	11	11.6462	14.4276	11.6645	13.7306	11.6407	8.8986	9.02025	3.79246	12.8081	7.71543	1.66006	0.0632533
sp|P21926|CD9_HUMAN	CD9	CD9 antigen OS=Homo sapiens OX=9606 GN=CD9 PE=1 SV=4	501	1	10.6504	6.79052	5.00717	2.60675	24.3979	17.8425	18.7596	6.17551	5.54294	14.9857	0.369883	0.0635492
sp|Q6IS14|IF5AL_HUMAN	EIF5AL1	Eukaryotic translation initiation factor 5A-1-like OS=Homo sapiens OX=9606 GN=EIF5AL1 PE=2 SV=2	656	2	9.24391	10.1182	11.4205	11.6051	7.63301	10.3394	8.9838	7.44207	10.5517	8.52288	1.23805	0.0642078
sp|P01024|CO3_HUMAN	C3	Complement C3 OS=Homo sapiens OX=9606 GN=C3 PE=1 SV=2	29	95	10.2276	7.30174	10.9318	8.39133	13.6805	12.4871	13.1272	9.27672	9.09768	12.0097	0.757527	0.0648435
sp|P61916|NPC2_HUMAN	NPC2	NPC intracellular cholesterol transporter 2 OS=Homo sapiens OX=9606 GN=NPC2 PE=1 SV=1	218	8	8.58712	5.35716	9.39469	7.12688	14.6645	23.7007	15.6843	9.16308	7.44974	14.9497	0.498319	0.0669896
sp|O60911|CATL2_HUMAN	CTSV	Cathepsin L2 OS=Homo sapiens OX=9606 GN=CTSV PE=1 SV=2	317	8	8.15832	4.47055	12.5361	8.29998	11.8105	15.1826	19.29	10.3645	7.84875	13.7602	0.570396	0.0672837
sp|Q9UNP9|PPIE_HUMAN	PPIE	Peptidyl-prolyl cis-trans isomerase E OS=Homo sapiens OX=9606 GN=PPIE PE=1 SV=1	352	2	7.47683	8.12965	10.7504	13.3472	4.36387	7.26232	5.38524	8.03524	9.66387	6.08538	1.58805	0.0681944
sp|P10643|CO7_HUMAN	C7	Complement component C7 OS=Homo sapiens OX=9606 GN=C7 PE=1 SV=2	199	6	10.1262	11.8109	10.42	10.9489	10.6057	8.05168	8.17074	9.73636	10.8079	9.07864	1.19048	0.0682172
sp|P20774|MIME_HUMAN	OGN	Mimecan OS=Homo sapiens OX=9606 GN=OGN PE=1 SV=1	227	3	10.0297	10.153	12.457	13.8441	8.45773	10.5977	8.77825	4.71805	11.5117	7.80565	1.47479	0.0682258
sp|Q12907|LMAN2_HUMAN	LMAN2	Vesicular integral-membrane protein VIP36 OS=Homo sapiens OX=9606 GN=LMAN2 PE=1 SV=1	259	7	8.52946	6.91373	7.89119	7.30973	14.6589	15.5644	13.6304	7.322	7.63694	12.2841	0.621694	0.0683227
sp|P68366|TBA4A_HUMAN	TUBA4A	Tubulin alpha-4A chain OS=Homo sapiens OX=9606 GN=TUBA4A PE=1 SV=1	167	1	10.5151	9.48773	12.6161	15.9656	7.64465	10.6656	8.70751	4.87542	11.9062	7.6703	1.55224	0.068538
sp|P12259|FA5_HUMAN	F5	Coagulation factor V OS=Homo sapiens OX=9606 GN=F5 PE=1 SV=4	6	16	9.32811	11.1903	12.1518	14.1368	9.41229	8.7937	10.2968	5.57032	11.572	8.30065	1.3941	0.0685726
sp|Q8WUM4|PDC6I_HUMAN	PDCD6IP	Programmed cell death 6-interacting protein OS=Homo sapiens OX=9606 GN=PDCD6IP PE=1 SV=1	336	2	10.6722	7.03992	9.19534	7.97174	15.2004	18.6168	11.9794	9.7564	8.61461	13.4856	0.638799	0.0688973
sp|P08294|SODE_HUMAN	SOD3	Extracellular superoxide dismutase [Cu-Zn] OS=Homo sapiens OX=9606 GN=SOD3 PE=1 SV=2	74	3	8.58978	7.15096	6.83073	7.94539	9.96542	13.9036	9.5715	17.5834	7.59858	12.3574	0.614902	0.0695106
sp|Q9UBX1|CATF_HUMAN	CTSF	Cathepsin F OS=Homo sapiens OX=9606 GN=CTSF PE=1 SV=1	378	1	8.53602	8.94167	8.77225	10.3763	10.5558	10.9705	9.27605	10.7729	9.12971	10.3718	0.880245	0.0710584
sp|Q15063|POSTN_HUMAN	POSTN	Periostin OS=Homo sapiens OX=9606 GN=POSTN PE=1 SV=2	237	30	9.67721	10.6835	9.64128	11.5011	8.70328	9.37286	9.70473	9.00694	10.3475	9.18923	1.12604	0.0712152
sp|Q04695|K1C17_HUMAN_contaminant	KRT17	Keratin, type I cytoskeletal 17 OS=Homo sapiens GN=KRT17 PE=1 SV=2	37	2	17.131	10.5948	13.9445	10.4845	5.24948	12.3758	8.88361	4.59991	12.7631	7.17806	1.77807	0.0712709
sp|Q8IUX7|AEBP1_HUMAN	AEBP1	Adipocyte enhancer-binding protein 1 OS=Homo sapiens OX=9606 GN=AEBP1 PE=1 SV=1	91	3	8.67275	5.61833	9.80327	9.0643	12.5494	11.2843	14.5467	8.59086	8.1118	11.5339	0.703303	0.0713163
sp|P48740|MASP1_HUMAN	MASP1	Mannan-binding lectin serine protease 1 OS=Homo sapiens OX=9606 GN=MASP1 PE=1 SV=3	258	2	9.19092	10.948	10.7195	10.8499	8.92058	9.69648	9.74689	7.54197	10.401	8.92975	1.16475	0.0725129
sp|Q86UX7|URP2_HUMAN	FERMT3	Fermitin family homolog 3 OS=Homo sapiens OX=9606 GN=FERMT3 PE=1 SV=1	335	3	9.05943	11.3671	11.8118	13.9332	9.45793	9.87514	9.16164	5.92685	11.4098	8.43887	1.35206	0.0726002
sp|P41222|PTGDS_HUMAN	PTGDS	Prostaglandin-H2 D-isomerase OS=Homo sapiens OX=9606 GN=PTGDS PE=1 SV=1	17	22	9.89176	5.62907	6.6285	6.92506	11.3157	24.1074	11.361	14.1611	7.11029	14.4739	0.491248	0.0736086
sp|Q8NBJ4|GOLM1_HUMAN	GOLM1	Golgi membrane protein 1 OS=Homo sapiens OX=9606 GN=GOLM1 PE=1 SV=1	256	4	7.77016	5.72457	7.89394	8.453	10.5255	12.3998	11.5861	21.1455	7.38107	13.3722	0.551971	0.0737957
sp|Q99715|COCA1_HUMAN	COL12A1	Collagen alpha-1(XII) chain OS=Homo sapiens OX=9606 GN=COL12A1 PE=1 SV=2	99	13	10.9488	7.3604	7.42241	8.70724	12.108	9.48016	14.3442	10.3826	8.49519	11.4345	0.742943	0.0744241
sp|P20908|CO5A1_HUMAN	COL5A1	Collagen alpha-1(V) chain OS=Homo sapiens OX=9606 GN=COL5A1 PE=1 SV=3	109	15	8.85388	7.94394	9.33684	10.3152	9.46223	10.8598	12.8538	10.8043	9.07218	10.9298	0.830044	0.0751094
sp|P60033|CD81_HUMAN	CD81	CD81 antigen OS=Homo sapiens OX=9606 GN=CD81 PE=1 SV=1	582	1	7.79911	8.19536	7.35934	9.011	15.5752	15.3987	16.0933	7.36434	8.06875	12.9845	0.621415	0.075472
sp|P61769|B2MG_HUMAN	B2M	Beta-2-microglobulin OS=Homo sapiens OX=9606 GN=B2M PE=1 SV=1	453	8	5.65062	2.84559	4.83131	3.49131	9.06623	12.466	19.2448	33.8195	4.05817	16.4687	0.246418	0.0770246
sp|P54289|CA2D1_HUMAN	CACNA2D1	Voltage-dependent calcium channel subunit alpha-2/delta-1 OS=Homo sapiens OX=9606 GN=CACNA2D1 PE=1 SV=3	165	12	9.98784	11.774	10.3864	11.5717	10.4072	9.94016	9.3872	7.80244	10.9035	9.32982	1.16867	0.0773071
sp|Q06033|ITIH3_HUMAN	ITIH3	Inter-alpha-trypsin inhibitor heavy chain H3 OS=Homo sapiens OX=9606 GN=ITIH3 PE=1 SV=2	342	27	9.71595	11.1534	11.9887	12.8153	9.44361	9.94811	10.5384	6.85192	11.3592	9.07541	1.25165	0.0799838
sp|P01614|KVD40_HUMAN	IGKV2D-40	Immunoglobulin kappa variable 2D-40 OS=Homo sapiens OX=9606 GN=IGKV2D-40 PE=1 SV=2	148	1	10.0613	10.6293	12.2613	13.0483	10.3413	10.1464	9.98237	7.73275	11.437	9.48667	1.20559	0.0805331
sp|P25774|CATS_HUMAN	CTSS	Cathepsin S OS=Homo sapiens OX=9606 GN=CTSS PE=1 SV=3	393	1	9.74619	10.1624	10.279	12.5623	9.18517	9.25322	9.84486	7.95312	10.6344	9.03196	1.17742	0.0814358
sp|Q9BUD6|SPON2_HUMAN	SPON2	Spondin-2 OS=Homo sapiens OX=9606 GN=SPON2 PE=1 SV=3	114	4	12.1085	5.17622	9.26914	5.05143	14.9009	21.0519	13.0839	8.85059	7.36019	13.8055	0.533133	0.0815323
sp|P01008|ANT3_HUMAN	SERPINC1	Antithrombin-III OS=Homo sapiens OX=9606 GN=SERPINC1 PE=1 SV=1	356	23	11.3054	13.1749	11.3823	12.9327	10.6606	9.38691	10.271	4.72899	12.1685	8.34971	1.45736	0.0817342
sp|Q9UI42|CBPA4_HUMAN	CPA4	Carboxypeptidase A4 OS=Homo sapiens OX=9606 GN=CPA4 PE=1 SV=2	263	4	8.18519	10.1092	5.78241	7.75032	20.8483	12.9605	14.7022	8.64186	7.80357	13.612	0.573288	0.08235
sp|P04745|AMY1_HUMAN_contaminant	AMY1A	Alpha-amylase 1 OS=Homo sapiens GN=AMY1A PE=1 SV=2	119	5	10.3954	12.286	12.473	12.8835	10.4716	9.5636	10.5229	5.44713	11.9692	8.70431	1.37509	0.0825109
sp|Q14118|DAG1_HUMAN	DAG1	Dystroglycan OS=Homo sapiens OX=9606 GN=DAG1 PE=1 SV=2	286	5	8.15853	6.85975	8.13362	8.768	9.93438	11.4454	11.1722	18.1638	7.94833	12.3248	0.644907	0.082639
sp|Q02509|OC90_HUMAN	OC90	Otoconin-90 OS=Homo sapiens OX=9606 GN=OC90 PE=2 SV=4	12	40	7.84024	8.18961	5.27303	7.11432	16.1104	14.6784	7.09145	22.4207	7.00562	13.9249	0.5031	0.0826549
sp|Q13822|ENPP2_HUMAN	ENPP2	Ectonucleotide pyrophosphatase/phosphodiesterase family member 2 OS=Homo sapiens OX=9606 GN=ENPP2 PE=1 SV=3	79	24	9.59624	8.44337	7.26813	7.79173	13.6064	18.0672	11.0397	9.37568	8.23035	12.6299	0.651658	0.0833475
sp|P63244|RACK1_HUMAN	RACK1	Receptor of activated protein C kinase 1 OS=Homo sapiens OX=9606 GN=RACK1 PE=1 SV=3	239	1	13.6416	8.79995	15.3602	11.9259	6.67375	11.9523	8.51908	7.37419	12.1775	8.4136	1.44736	0.0837138
sp|P41271|NBL1_HUMAN	NBL1	Neuroblastoma suppressor of tumorigenicity 1 OS=Homo sapiens OX=9606 GN=NBL1 PE=1 SV=2	514	2	9.16895	8.5488	9.56822	9.36644	10.4036	10.3513	11.1977	14.4571	9.15498	11.4907	0.796729	0.0837597
sp|P02042|HBD_HUMAN	HBD	Hemoglobin subunit delta OS=Homo sapiens OX=9606 GN=HBD PE=1 SV=2	530	5	9.82569	8.1488	13.6021	15.5316	6.56588	9.64807	8.67782	5.18223	11.4043	7.30576	1.56101	0.0843559
sp|Q16853|AOC3_HUMAN	AOC3	Membrane primary amine oxidase OS=Homo sapiens OX=9606 GN=AOC3 PE=1 SV=3	0	2	10.7171	11.9033	11.5213	13.1769	10.1343	9.08665	11.1698	6.05572	11.7968	8.88387	1.32789	0.0855278
sp|Q00610|CLH1_HUMAN	CLTC	Clathrin heavy chain 1 OS=Homo sapiens OX=9606 GN=CLTC PE=1 SV=5	446	2	13.3285	8.7995	13.6579	12.2803	9.11153	11.1328	9.04294	5.48885	11.8429	8.42358	1.40592	0.0857148
sp|P08779|K1C16_HUMAN_contaminant	KRT16	Keratin, type I cytoskeletal 16 OS=Homo sapiens GN=KRT16 PE=1 SV=4	37	18	13.98	13.594	15.1537	10.7835	4.42868	12.4844	11.116	4.46096	13.275	7.2361	1.83455	0.0860424
sp|O95497|VNN1_HUMAN	VNN1	Pantetheinase OS=Homo sapiens OX=9606 GN=VNN1 PE=1 SV=2	58	4	9.86306	11.6303	11.0202	13.6674	10.6974	8.85429	10.0701	6.46826	11.4649	8.86264	1.29362	0.0867196
sp|Q9NQ79|CRAC1_HUMAN	CRTAC1	Cartilage acidic protein 1 OS=Homo sapiens OX=9606 GN=CRTAC1 PE=1 SV=2	307	1	7.71795	7.41056	6.96175	7.39463	9.99273	19.5505	8.92642	16.9877	7.36626	13.1194	0.561479	0.0880658
sp|P04406|G3P_HUMAN	GAPDH	Glyceraldehyde-3-phosphate dehydrogenase OS=Homo sapiens OX=9606 GN=GAPDH PE=1 SV=3	8	19	10.1892	9.6367	9.76623	10.7625	7.22854	9.16068	7.99173	10.0065	10.0792	8.53052	1.18155	0.088633
sp|P17900|SAP3_HUMAN	GM2A	Ganglioside GM2 activator OS=Homo sapiens OX=9606 GN=GM2A PE=1 SV=4	337	1	8.90817	10.4275	9.22677	8.94095	10.0338	13.0152	10.9963	10.1449	9.35622	10.9863	0.851624	0.090271
sp|P19022|CADH2_HUMAN	CDH2	Cadherin-2 OS=Homo sapiens OX=9606 GN=CDH2 PE=1 SV=4	275	7	8.16042	8.05398	6.43764	7.15121	11.7962	10.3273	9.31905	18.498	7.41664	12.0381	0.6161	0.0906413
sp|P35443|TSP4_HUMAN	THBS4	Thrombospondin-4 OS=Homo sapiens OX=9606 GN=THBS4 PE=1 SV=2	80	9	9.27036	10.6633	10.9896	11.8246	9.97521	9.24681	9.79177	7.52568	10.6461	9.07988	1.17249	0.0908684
sp|P68363|TBA1B_HUMAN	TUBA1B	Tubulin alpha-1B chain OS=Homo sapiens OX=9606 GN=TUBA1B PE=1 SV=1	167	19	11.6993	11.1585	10.5478	11.3379	8.32362	11.5091	7.85446	6.08658	11.178	8.22642	1.3588	0.0909161
sp|P23528|COF1_HUMAN	CFL1	Cofilin-1 OS=Homo sapiens OX=9606 GN=CFL1 PE=1 SV=3	447	8	13.4298	9.89825	10.1869	11.1568	6.83362	10.5532	6.81879	10.0319	11.0867	8.38072	1.32288	0.0912257
sp|Q96IY4|CBPB2_HUMAN	CPB2	Carboxypeptidase B2 OS=Homo sapiens OX=9606 GN=CPB2 PE=1 SV=2	686	1	9.87953	9.77111	11.6331	13.6359	8.21485	11.2506	8.12108	6.24125	11.1241	8.27304	1.34462	0.0916852
sp|P15169|CBPN_HUMAN	CPN1	Carboxypeptidase N catalytic chain OS=Homo sapiens OX=9606 GN=CPN1 PE=1 SV=1	285	1	9.54558	10.1203	11.7954	12.9063	10.828	8.84273	8.34429	5.65771	11.0123	8.19957	1.34303	0.0928005
sp|P13647|K2C5_HUMAN_contaminant	KRT5	Keratin, type II cytoskeletal 5 OS=Homo sapiens GN=KRT5 PE=1 SV=3	316	37	14.1054	12.595	13.9749	8.93898	5.79547	10.1116	11.9764	6.29831	12.2055	8.15389	1.49689	0.0933982
sp|Q01995|TAGL_HUMAN	TAGLN	Transgelin OS=Homo sapiens OX=9606 GN=TAGLN PE=1 SV=4	300	8	12.5598	10.6106	12.7502	13.8507	7.43595	12.6197	10.3128	7.94394	12.3859	9.36374	1.32275	0.0937131
sp|P02458|CO2A1_HUMAN	COL2A1	Collagen alpha-1(II) chain OS=Homo sapiens OX=9606 GN=COL2A1 PE=1 SV=3	109	9	11.8569	14.8103	8.9839	10.4654	10.0401	8.09443	7.67726	8.54399	11.3355	8.54472	1.3266	0.0938287
sp|P25788|PSA3_HUMAN	PSMA3	Proteasome subunit alpha type-3 OS=Homo sapiens OX=9606 GN=PSMA3 PE=1 SV=2	475	2	10.4457	8.8054	11.5147	12.2123	9.38636	9.48996	8.87622	8.21579	10.6643	8.97759	1.18789	0.0943272
sp|P02768|ALBU_HUMAN_contaminant	ALB	Serum albumin OS=Homo sapiens GN=ALB PE=1 SV=2	4	135	9.82548	11.7598	9.61382	10.8015	10.4661	8.78497	8.94174	8.68216	10.4661	9.19166	1.13865	0.0962902
sp|P52888|THOP1_HUMAN	THOP1	Thimet oligopeptidase OS=Homo sapiens OX=9606 GN=THOP1 PE=1 SV=2	168	1	10.8621	10.7614	8.52953	9.08308	11.6967	15.254	14.6262	9.72027	9.75518	12.6201	0.772985	0.0978874
sp|P00338|LDHA_HUMAN	LDHA	L-lactate dehydrogenase A chain OS=Homo sapiens OX=9606 GN=LDHA PE=1 SV=2	265	6	11.7389	9.20064	10.7429	11.8887	7.55494	10.498	9.71582	8.92077	10.8374	9.10552	1.1902	0.0988552
sp|P0C0L4|CO4A_HUMAN	C4A	Complement C4-A OS=Homo sapiens OX=9606 GN=C4A PE=1 SV=2	2	69	9.47801	8.1569	8.5326	9.4296	15.7773	12.0488	12.1981	8.79023	8.88084	11.9486	0.743254	0.100818
sp|P10909|CLUS_HUMAN	CLU	Clusterin OS=Homo sapiens OX=9606 GN=CLU PE=1 SV=1	153	27	8.64357	4.518	4.86358	3.81248	13.1439	12.8813	9.69167	31.1376	5.18741	15.0346	0.345032	0.10144
sp|P55058|PLTP_HUMAN	PLTP	Phospholipid transfer protein OS=Homo sapiens OX=9606 GN=PLTP PE=1 SV=1	68	12	8.69023	5.97589	8.22498	7.98773	12.2616	20.6367	11.2999	9.48711	7.64272	12.8336	0.595524	0.101544
sp|P00742|FA10_HUMAN	F10	Coagulation factor X OS=Homo sapiens OX=9606 GN=F10 PE=1 SV=2	273	6	9.6829	11.4055	9.23238	11.2001	9.80718	7.96364	9.26079	9.23775	10.3375	9.04102	1.1434	0.10188
sp|P00918|CAH2_HUMAN	CA2	Carbonic anhydrase 2 OS=Homo sapiens OX=9606 GN=CA2 PE=1 SV=2	679	2	9.83325	11.2674	11.961	14.958	10.5315	9.76531	10.1668	7.15056	11.8656	9.29876	1.27604	0.102293
sp|P62826|RAN_HUMAN	RAN	GTP-binding nuclear protein Ran OS=Homo sapiens OX=9606 GN=RAN PE=1 SV=3	374	2	11.5771	9.15166	9.34267	10.7806	6.84233	9.82836	8.94485	4.6688	10.1637	7.27974	1.39617	0.103244
sp|P09668|CATH_HUMAN	CTSH	Pro-cathepsin H OS=Homo sapiens OX=9606 GN=CTSH PE=1 SV=4	415	2	10.0502	6.47362	11.5406	7.20138	14.4234	16.8146	13.8797	7.89664	8.57515	12.7686	0.671579	0.103823
sp|P51888|PRELP_HUMAN	PRELP	Prolargin OS=Homo sapiens OX=9606 GN=PRELP PE=1 SV=1	553	1	10.808	6.83821	9.76797	8.05203	14.18	18.36	9.29262	11.4371	8.73171	12.8974	0.677016	0.103832
sp|P30041|PRDX6_HUMAN	PRDX6	Peroxiredoxin-6 OS=Homo sapiens OX=9606 GN=PRDX6 PE=1 SV=3	233	1	10.1914	15.8219	10.977	11.2639	10.9415	9.69694	8.92772	6.07067	11.8827	8.70808	1.36456	0.104765
sp|P32119|PRDX2_HUMAN	PRDX2	Peroxiredoxin-2 OS=Homo sapiens OX=9606 GN=PRDX2 PE=1 SV=5	33	3	10.1865	10.7802	9.48678	10.7622	9.32823	10.2889	9.46972	8.57433	10.2901	9.39564	1.0952	0.105751
sp|P02655|APOC2_HUMAN	APOC2	Apolipoprotein C-II OS=Homo sapiens OX=9606 GN=APOC2 PE=1 SV=1	638	1	8.32006	11.1424	12.8553	15.6065	7.7102	8.8292	7.68477	9.94022	11.6781	8.49187	1.37521	0.105869
sp|Q13510|ASAH1_HUMAN	ASAH1	Acid ceramidase OS=Homo sapiens OX=9606 GN=ASAH1 PE=1 SV=5	328	3	10.0454	8.54106	8.94166	8.43255	13.402	13.3369	10.0212	9.15509	8.96838	11.3162	0.792524	0.106075
tr|B1AK88|B1AK88_HUMAN	CAPZB	F-actin-capping protein subunit beta OS=Homo sapiens OX=9606 GN=CAPZB PE=1 SV=1	605	2	9.80842	10.8524	11.0554	12.2694	9.77371	11.0131	8.51725	7.37604	10.9618	9.06824	1.20881	0.106535
sp|Q8N474|SFRP1_HUMAN	SFRP1	Secreted frizzled-related protein 1 OS=Homo sapiens OX=9606 GN=SFRP1 PE=1 SV=1	390	1	12.2804	7.91745	7.63925	6.96041	11.5365	11.4765	9.7197	13.0525	8.47951	11.3843	0.744841	0.108199
sp|P07357|CO8A_HUMAN	C8A	Complement component C8 alpha chain OS=Homo sapiens OX=9606 GN=C8A PE=1 SV=2	608	2	10.6152	12.1175	11.9258	13.9949	10.8872	9.80867	10.1152	4.15011	12.1046	8.18258	1.47931	0.110919
sp|P12273|PIP_HUMAN	PIP	Prolactin-inducible protein OS=Homo sapiens OX=9606 GN=PIP PE=1 SV=1	389	1	10.0803	8.46695	16.9058	11.5023	5.44054	6.83278	9.86459	8.50052	11.3502	7.47207	1.51902	0.111432
sp|P14618|KPYM_HUMAN	PKM	Pyruvate kinase PKM OS=Homo sapiens OX=9606 GN=PKM PE=1 SV=4	50	16	10.7514	10.0235	10.8132	11.7352	7.03081	11.2032	8.84194	8.7055	10.8139	8.82414	1.22549	0.112088
##sp|Q8N0S6|CENPL_HUMAN	##CENPL	####Centromere protein L OS=Homo sapiens OX=9606 GN=CENPL PE=1 SV=2	452	1	9.42505	9.48217	14.7646	14.3814	8.85206	10.249	9.69247	5.51784	11.7369	8.34608	1.40628	0.113089
sp|P10721|KIT_HUMAN	KIT	Mast/stem cell growth factor receptor Kit OS=Homo sapiens OX=9606 GN=KIT PE=1 SV=1	173	1	8.74841	11.4922	9.50847	10.6745	8.68807	9.46581	8.28921	8.66303	10.0507	8.76629	1.14652	0.113663
sp|Q9NPH3|IL1AP_HUMAN	IL1RAP	Interleukin-1 receptor accessory protein OS=Homo sapiens OX=9606 GN=IL1RAP PE=1 SV=2	581	3	9.07179	10.5143	11.6633	13.2921	8.85175	10.0632	9.71015	8.04943	11.0274	9.13459	1.20721	0.113824
sp|P06727|APOA4_HUMAN	APOA4	Apolipoprotein A-IV OS=Homo sapiens OX=9606 GN=APOA4 PE=1 SV=3	559	1	9.64305	9.335	10.1398	13.9022	9.34198	7.49344	8.83756	8.11668	10.6135	8.41798	1.26082	0.114847
sp|Q13308|PTK7_HUMAN	PTK7	Inactive tyrosine-protein kinase 7 OS=Homo sapiens OX=9606 GN=PTK7 PE=1 SV=2	487	3	8.91894	8.55077	10.0885	10.5526	12.8734	11.2074	9.39275	11.0888	9.4924	11.0718	0.857348	0.115126
sp|Q9BY67|CADM1_HUMAN	CADM1	Cell adhesion molecule 1 OS=Homo sapiens OX=9606 GN=CADM1 PE=1 SV=2	294	3	8.38335	12.1264	10.3537	11.3102	8.39318	8.79293	8.48534	9.52965	10.4455	8.78925	1.18844	0.116043
sp|Q04756|HGFA_HUMAN	HGFAC	Hepatocyte growth factor activator OS=Homo sapiens OX=9606 GN=HGFAC PE=1 SV=1	288	6	9.60035	11.2022	10.3322	12.4749	10.6923	9.4896	9.16639	8.56692	10.8506	9.44791	1.14847	0.116062
sp|P46779|RL28_HUMAN	RPL28	60S ribosomal protein L28 OS=Homo sapiens OX=9606 GN=RPL28 PE=1 SV=3	440	1	12.2453	6.15499	13.3508	10.6611	6.37593	10.4945	5.29917	5.44809	10.1772	6.62963	1.5351	0.116758
sp|Q93070|NAR4_HUMAN	ART4	Ecto-ADP-ribosyltransferase 4 OS=Homo sapiens OX=9606 GN=ART4 PE=2 SV=2	124	21	9.53072	10.5418	11.3648	13.3179	10.2269	9.62171	9.84689	6.56548	11.1048	8.9308	1.24342	0.117947
sp|Q92743|HTRA1_HUMAN	HTRA1	Serine protease HTRA1 OS=Homo sapiens OX=9606 GN=HTRA1 PE=1 SV=1	368	3	8.2762	6.62757	12.8222	7.68938	13.3774	11.7812	16.5494	8.98615	8.57551	12.3731	0.693075	0.118072
sp|Q14315|FLNC_HUMAN	FLNC	Filamin-C OS=Homo sapiens OX=9606 GN=FLNC PE=1 SV=3	49	8	11.9217	9.30536	11.597	12.4466	7.93678	11.9127	8.91173	7.06531	11.2491	8.78389	1.28065	0.118315
sp|P07358|CO8B_HUMAN	C8B	Complement component C8 beta chain OS=Homo sapiens OX=9606 GN=C8B PE=1 SV=3	194	2	11.4623	11.1332	11.7719	12.1608	11.3343	8.99734	10.1052	5.58472	11.6259	8.70991	1.33479	0.122108
sp|P12110|CO6A2_HUMAN	COL6A2	Collagen alpha-2(VI) chain OS=Homo sapiens OX=9606 GN=COL6A2 PE=1 SV=4	220	1	11.2026	7.25233	8.30606	8.34244	11.6213	12.642	12.6287	8.11789	8.66206	11.0782	0.781903	0.122477
sp|P24593|IBP5_HUMAN	IGFBP5	Insulin-like growth factor-binding protein 5 OS=Homo sapiens OX=9606 GN=IGFBP5 PE=1 SV=1	182	5	5.3991	3.6719	4.85639	4.48353	10.0781	10.0175	13.1695	33.7732	4.55813	14.5569	0.313124	0.123281
sp|P12035|K2C3_HUMAN_contaminant	KRT3	Keratin, type II cytoskeletal 3 OS=Homo sapiens GN=KRT3 PE=1 SV=3	316	3	19.6228	18.0261	9.62778	8.57958	6.70333	11.2775	7.5959	6.70196	13.0742	7.87628	1.65994	0.126521
sp|Q99439|CNN2_HUMAN	CNN2	Calponin-2 OS=Homo sapiens OX=9606 GN=CNN2 PE=1 SV=4	412	2	11.5676	10.2973	11.7863	12.6736	7.57121	9.23774	8.39584	12.3668	11.5494	9.23131	1.25112	0.1273
sp|Q15582|BGH3_HUMAN	TGFBI	Transforming growth factor-beta-induced protein ig-h3 OS=Homo sapiens OX=9606 GN=TGFBI PE=1 SV=1	36	18	8.68393	7.4283	7.60739	9.08762	14.1336	8.51326	15.4715	9.18398	8.1719	11.4348	0.714652	0.127467
sp|P05121|PAI1_HUMAN	SERPINE1	Plasminogen activator inhibitor 1 OS=Homo sapiens OX=9606 GN=SERPINE1 PE=1 SV=1	225	8	9.4114	7.65892	8.49468	8.60314	11.4684	15.3856	12.828	7.73058	8.51935	11.5013	0.740729	0.12773
sp|P00568|KAD1_HUMAN	AK1	Adenylate kinase isoenzyme 1 OS=Homo sapiens OX=9606 GN=AK1 PE=1 SV=3	158	1	7.80026	6.82177	7.62429	9.36609	8.21851	8.32169	11.3744	10.8185	7.85129	9.578	0.819721	0.127768
sp|Q14204|DYHC1_HUMAN	DYNC1H1	Cytoplasmic dynein 1 heavy chain 1 OS=Homo sapiens OX=9606 GN=DYNC1H1 PE=1 SV=5	667	1	11.7873	10.545	12.5983	10.1322	8.20377	11.2707	9.7864	5.46866	11.2233	8.3872	1.33814	0.127778
sp|P12109|CO6A1_HUMAN	COL6A1	Collagen alpha-1(VI) chain OS=Homo sapiens OX=9606 GN=COL6A1 PE=1 SV=3	174	25	9.32382	7.74293	9.79116	9.61713	12.4607	14.5326	13.121	8.00687	9.08019	11.7443	0.773154	0.128102
sp|Q5T750|XP32_HUMAN	XP32	Skin-specific protein 32 OS=Homo sapiens OX=9606 GN=XP32 PE=1 SV=1	620	2	15.3634	19.4989	12.8287	6.24696	8.12947	9.37154	7.99046	5.63536	12.4476	7.65318	1.62647	0.129894
sp|P11216|PYGB_HUMAN	PYGB	Glycogen phosphorylase, brain form OS=Homo sapiens OX=9606 GN=PYGB PE=1 SV=5	633	1	11.669	10.5622	11.4947	11.3918	8.52753	12.0183	8.41931	6.05846	11.2712	8.50308	1.32554	0.130432
sp|P24043|LAMA2_HUMAN	LAMA2	Laminin subunit alpha-2 OS=Homo sapiens OX=9606 GN=LAMA2 PE=1 SV=4	223	2	7.73418	7.30772	8.24734	9.1216	9.86554	9.83348	13.916	8.447	8.07505	10.3338	0.781419	0.131177
sp|Q06481|APLP2_HUMAN	APLP2	Amyloid-like protein 2 OS=Homo sapiens OX=9606 GN=APLP2 PE=1 SV=2	205	1	6.37071	7.68083	8.04478	9.94445	12.495	9.2649	8.04105	10.7416	7.90993	9.99976	0.791012	0.133226
sp|Q9NPG4|PCD12_HUMAN	PCDH12	Protocadherin-12 OS=Homo sapiens OX=9606 GN=PCDH12 PE=1 SV=1	318	1	8.74838	6.76102	6.93721	7.24129	15.4149	7.05409	9.31208	12.5681	7.38304	10.6212	0.695121	0.137568
sp|Q9NZR1|TMOD2_HUMAN	TMOD2	Tropomodulin-2 OS=Homo sapiens OX=9606 GN=TMOD2 PE=1 SV=1	639	4	12.1607	13.2886	11.2149	8.31188	4.95886	6.89314	6.1111	12.7049	11.0786	7.17749	1.54351	0.138081
sp|Q01518|CAP1_HUMAN	CAP1	Adenylyl cyclase-associated protein 1 OS=Homo sapiens OX=9606 GN=CAP1 PE=1 SV=5	486	5	12.6587	13.4536	8.70824	10.0574	8.1097	8.26283	6.0014	11.5839	11.0512	8.26153	1.33768	0.138707
sp|P19823|ITIH2_HUMAN	ITIH2	Inter-alpha-trypsin inhibitor heavy chain H2 OS=Homo sapiens OX=9606 GN=ITIH2 PE=1 SV=2	122	36	8.59869	11.2009	10.1784	10.5934	9.43057	8.51389	8.92352	9.31685	10.0949	9.03895	1.11682	0.141653
sp|P00441|SODC_HUMAN	SOD1	Superoxide dismutase [Cu-Zn] OS=Homo sapiens OX=9606 GN=SOD1 PE=1 SV=2	407	3	10.0444	14.4232	10.1811	10.6412	6.56749	11.3972	7.49566	9.71607	11.1929	8.5926	1.30262	0.144708
sp|P01034|CYTC_HUMAN	CST3	Cystatin-C OS=Homo sapiens OX=9606 GN=CST3 PE=1 SV=1	54	24	7.66754	7.08728	9.41628	9.67573	9.8168	15.4448	8.71249	19.5819	8.38831	12.682	0.661435	0.145717
sp|P13645|K1C10_HUMAN_contaminant	KRT10	Keratin, type I cytoskeletal 10 OS=Homo sapiens GN=KRT10 PE=1 SV=6	37	89	16.8267	12.9395	13.9981	7.29652	6.87786	8.92749	11.9346	7.39714	12.2117	8.58052	1.42319	0.146972
sp|P01031|CO5_HUMAN	C5	Complement C5 OS=Homo sapiens OX=9606 GN=C5 PE=1 SV=4	495	12	10.6152	11.4863	12.3262	12.7538	10.8407	10.216	10.2131	4.61018	11.7664	8.49774	1.38465	0.147002
sp|P40967|PMEL_HUMAN	PMEL	Melanocyte protein PMEL OS=Homo sapiens OX=9606 GN=PMEL PE=1 SV=2	125	2	7.30112	8.99668	4.97548	5.80858	8.3748	8.745	7.00841	11.1546	6.60076	8.69865	0.758826	0.148158
sp|P35908|K22E_HUMAN_contaminant	KRT2	Keratin, type II cytoskeletal 2 epidermal OS=Homo sapiens GN=KRT2 PE=1 SV=2	316	82	17.4278	13.5589	13.9795	7.57939	7.32422	7.51858	13.9119	5.63212	12.5791	8.10474	1.55206	0.149131
sp|P19021|AMD_HUMAN	PAM	Peptidyl-glycine alpha-amidating monooxygenase OS=Homo sapiens OX=9606 GN=PAM PE=1 SV=2	538	2	9.96773	7.12365	10.8462	7.55307	10.8864	12.2001	15.6022	8.54854	8.73323	11.5367	0.756996	0.150456
sp|Q99983|OMD_HUMAN	OMD	Osteomodulin OS=Homo sapiens OX=9606 GN=OMD PE=1 SV=1	309	2	8.88597	10.7888	10.8168	11.3295	9.48892	8.94731	9.30229	9.97389	10.4111	9.42087	1.10511	0.151876
sp|O14818|PSA7_HUMAN	PSMA7	Proteasome subunit alpha type-7 OS=Homo sapiens OX=9606 GN=PSMA7 PE=1 SV=1	478	1	10.7769	8.87049	11.1085	12.1169	8.88175	10.8671	9.15718	8.05567	10.6506	9.18584	1.15945	0.152496
sp|Q13232|NDK3_HUMAN	NME3	Nucleoside diphosphate kinase 3 OS=Homo sapiens OX=9606 GN=NME3 PE=1 SV=2	621	1	10.5165	11.424	11.0425	11.3761	9.83914	11.3733	8.94439	6.53545	11.0838	8.99327	1.23245	0.153439
sp|P20742|PZP_HUMAN	PZP	Pregnancy zone protein OS=Homo sapiens OX=9606 GN=PZP PE=1 SV=4	162	10	10.2644	11.1245	12.9944	13.434	10.4482	10.5747	10.6776	4.47059	11.8821	8.52191	1.3943	0.155807
sp|P63104|1433Z_HUMAN	YWHAZ	14-3-3 protein zeta/delta OS=Homo sapiens OX=9606 GN=YWHAZ PE=1 SV=1	260	3	11.1927	11.149	10.5479	10.7723	8.79161	11.7619	8.82693	7.49652	10.9122	9.09502	1.1998	0.155838
sp|P04264|K2C1_HUMAN_contaminant	KRT1	Keratin, type II cytoskeletal 1 OS=Homo sapiens GN=KRT1 PE=1 SV=6	316	124	16.4246	12.8423	13.5556	7.7646	6.07982	8.82692	13.1505	7.22851	12.2066	8.45128	1.44435	0.159694
sp|Q9UK55|ZPI_HUMAN	SERPINA10	Protein Z-dependent protease inhibitor OS=Homo sapiens OX=9606 GN=SERPINA10 PE=1 SV=1	347	2	8.90246	11.314	11.8651	14.9317	9.39243	9.82668	11.0749	4.60803	11.5578	8.28438	1.39514	0.159921
sp|P02533|K1C14_HUMAN_contaminant	KRT14	Keratin, type I cytoskeletal 14 OS=Homo sapiens GN=KRT14 PE=1 SV=4	37	10	12.4786	14.5309	10.7138	8.67933	6.46834	8.95719	12.2222	7.39234	11.3952	8.50597	1.33967	0.160729
sp|P17655|CAN2_HUMAN	CAPN2	Calpain-2 catalytic subunit OS=Homo sapiens OX=9606 GN=CAPN2 PE=1 SV=6	102	2	9.47553	9.46397	13.6399	14.3206	7.40177	11.3398	10.5903	5.06493	11.5044	8.19135	1.40445	0.161939
sp|Q86SQ4|AGRG6_HUMAN	ADGRG6	Adhesion G-protein coupled receptor G6 OS=Homo sapiens OX=9606 GN=ADGRG6 PE=1 SV=3	350	1	9.31224	10.5091	12.2708	12.2	10.5388	10.9338	8.27191	7.35025	11.0018	9.14887	1.20253	0.162631
sp|Q96CG8|CTHR1_HUMAN	CTHRC1	Collagen triple helix repeat-containing protein 1 OS=Homo sapiens OX=9606 GN=CTHRC1 PE=1 SV=1	457	1	9.63482	8.89041	8.08187	8.33239	11.5804	13.1055	8.39708	9.54844	8.71489	10.5029	0.82976	0.163338
sp|P02771|FETA_HUMAN	AFP	Alpha-fetoprotein OS=Homo sapiens OX=9606 GN=AFP PE=1 SV=1	443	25	10.9177	12.3808	10.0158	10.5511	11.8089	9.33211	7.92081	6.9462	10.9324	8.82422	1.23891	0.163646
sp|Q96P63|SPB12_HUMAN_contaminant	SERPINB12	Serpin B12 OS=Homo sapiens GN=SERPINB12 PE=1 SV=1	410	2	12.5485	9.56127	13.3458	9.71935	6.12704	10.3716	10.7426	8.88978	11.1692	8.82621	1.26546	0.164558
sp|Q93088|BHMT1_HUMAN	BHMT	Betaine--homocysteine S-methyltransferase 1 OS=Homo sapiens OX=9606 GN=BHMT PE=1 SV=2	86	2	7.12363	8.91432	8.43369	10.1066	9.82141	13.5039	8.67959	10.4148	8.57735	10.464	0.819704	0.164894
sp|Q9Y4K0|LOXL2_HUMAN	LOXL2	Lysyl oxidase homolog 2 OS=Homo sapiens OX=9606 GN=LOXL2 PE=1 SV=1	92	2	7.20795	8.81852	7.49908	9.53944	14.8132	7.52634	18.9813	10.1458	8.21173	12.1049	0.67838	0.166282
sp|P05556|ITB1_HUMAN	ITGB1	Integrin beta-1 OS=Homo sapiens OX=9606 GN=ITGB1 PE=1 SV=2	470	2	9.83565	11.011	11.0964	11.9398	10.7744	10.8589	9.08748	8.24515	10.9447	9.67621	1.13109	0.171316
sp|Q9BZH6|WDR11_HUMAN	WDR11	WD repeat-containing protein 11 OS=Homo sapiens OX=9606 GN=WDR11 PE=1 SV=1	598	1	7.66826	8.30215	15.663	15.6268	7.45941	7.97799	10.1546	5.92966	11.1727	7.737	1.44406	0.175393
sp|P62714|PP2AB_HUMAN	PPP2CB	Serine/threonine-protein phosphatase 2A catalytic subunit beta isoform OS=Homo sapiens OX=9606 GN=PPP2CB PE=1 SV=1	207	1	8.12492	9.6473	15.3409	15.2628	9.86002	12.6456	5.03177	3.47002	11.6393	6.83074	1.70396	0.177237
sp|P50991|TCPD_HUMAN	CCT4	T-complex protein 1 subunit delta OS=Homo sapiens OX=9606 GN=CCT4 PE=1 SV=4	213	1	10.8127	9.01081	11.427	13.7405	9.36306	11.4507	8.99138	5.33746	11.1214	8.4694	1.31312	0.178524
sp|P26927|HGFL_HUMAN	MST1	Hepatocyte growth factor-like protein OS=Homo sapiens OX=9606 GN=MST1 PE=1 SV=2	195	7	11.108	11.1143	11.2057	11.1286	11.5294	10.0781	9.4453	7.17545	11.1391	9.42025	1.18246	0.179027
sp|O14773|TPP1_HUMAN	TPP1	Tripeptidyl-peptidase 1 OS=Homo sapiens OX=9606 GN=TPP1 PE=1 SV=2	41	5	10.925	11.7565	8.62175	8.2357	13.1321	13.1007	10.369	10.1785	9.77235	11.6081	0.841854	0.179182
sp|P02766|TTHY_HUMAN	TTR	Transthyretin OS=Homo sapiens OX=9606 GN=TTR PE=1 SV=1	5	14	7.49903	5.89596	4.27967	5.6233	6.64939	17.3706	5.11539	16.2695	5.71137	9.90176	0.576804	0.180174
sp|P04180|LCAT_HUMAN	LCAT	Phosphatidylcholine-sterol acyltransferase OS=Homo sapiens OX=9606 GN=LCAT PE=1 SV=1	21	2	9.63391	11.6191	10.0945	11.3866	10.1162	8.58342	10.1478	10.1101	10.6503	9.71519	1.09626	0.180615
sp|P23142|FBLN1_HUMAN	FBLN1	Fibulin-1 OS=Homo sapiens OX=9606 GN=FBLN1 PE=1 SV=4	202	24	11.6212	11.3114	10.4723	10.5787	11.5685	10.2526	8.35989	8.14615	10.9853	9.48017	1.15876	0.181504
sp|P0DMV8|HS71A_HUMAN	HSPA1A	Heat shock 70 kDa protein 1A OS=Homo sapiens OX=9606 GN=HSPA1A PE=1 SV=1	133	4	7.9856	10.5325	12.2894	12.8141	8.7292	9.56952	10.3298	6.9466	10.7279	8.79898	1.21922	0.182395
sp|P04792|HSPB1_HUMAN	HSPB1	Heat shock protein beta-1 OS=Homo sapiens OX=9606 GN=HSPB1 PE=1 SV=2	135	2	8.68637	8.31677	7.84059	7.97409	6.68591	12.8956	10.4465	14.462	8.19796	10.6832	0.767371	0.183205
sp|P14210|HGF_HUMAN	HGF	Hepatocyte growth factor OS=Homo sapiens OX=9606 GN=HGF PE=1 SV=2	252	1	11.857	7.87096	14.8755	15.6809	10.1442	10.7251	10.9299	4.06383	12.1468	8.33763	1.45686	0.186252
sp|P05156|CFAI_HUMAN	CFI	Complement factor I OS=Homo sapiens OX=9606 GN=CFI PE=1 SV=2	31	8	9.96219	9.35072	10.0126	10.8211	11.9903	10.8771	9.43953	12.6656	10.0232	11.1745	0.896963	0.189778
sp|P12111|CO6A3_HUMAN	COL6A3	Collagen alpha-3(VI) chain OS=Homo sapiens OX=9606 GN=COL6A3 PE=1 SV=5	103	9	10.5687	9.43897	9.58764	10.0699	8.2132	10.2852	9.2816	6.71916	9.90651	8.51953	1.1628	0.19028
sp|Q6KB66|K2C80_HUMAN_contaminant	KRT80	Keratin, type II cytoskeletal 80 OS=Homo sapiens GN=KRT80 PE=1 SV=2	316	2	13.3867	12.5123	13.4131	9.88876	7.22593	10.528	13.5958	5.22797	12.2087	8.5752	1.42372	0.190595
sp|P07339|CATD_HUMAN_contaminant	CTSD	Cathepsin D OS=Homo sapiens GN=CTSD PE=1 SV=1	187	15	10.3975	8.14351	9.02279	8.57233	13.3333	18.7499	11.5912	7.78963	8.99591	12.2573	0.733922	0.19078
sp|P19827|ITIH1_HUMAN	ITIH1	Inter-alpha-trypsin inhibitor heavy chain H1 OS=Homo sapiens OX=9606 GN=ITIH1 PE=1 SV=3	14	4	9.14316	10.6722	10.1869	11.2069	9.98346	9.53077	9.87971	8.6019	10.2735	9.48281	1.08338	0.192316
sp|P01876|IGHA1_HUMAN	IGHA1	Immunoglobulin heavy constant alpha 1 OS=Homo sapiens OX=9606 GN=IGHA1 PE=1 SV=2	215	1	8.94509	11.2453	12.2132	9.13561	9.40441	7.65495	10.7475	5.97458	10.2927	8.2456	1.24827	0.193002
sp|Q9Y6Z7|COL10_HUMAN	COLEC10	Collectin-10 OS=Homo sapiens OX=9606 GN=COLEC10 PE=1 SV=2	406	1	8.13295	9.225	11.1053	11.7317	7.52365	9.40993	9.50322	7.89428	9.94321	8.53689	1.16473	0.193529
sp|P03952|KLKB1_HUMAN	KLKB1	Plasma kallikrein OS=Homo sapiens OX=9606 GN=KLKB1 PE=1 SV=1	324	3	10.8888	14.6517	9.89283	10.6232	12.2609	8.75929	9.25159	6.10772	11.3792	8.82616	1.28926	0.194691
sp|P21246|PTN_HUMAN	PTN	Pleiotrophin OS=Homo sapiens OX=9606 GN=PTN PE=1 SV=1	634	1	11.0287	5.51338	6.37313	4.62803	8.32827	10.0962	10.8922	26.6577	6.50763	12.5001	0.520607	0.194819
sp|Q14624|ITIH4_HUMAN	ITIH4	Inter-alpha-trypsin inhibitor heavy chain H4 OS=Homo sapiens OX=9606 GN=ITIH4 PE=1 SV=4	332	6	7.84261	9.24588	16.6978	16.8385	8.21441	10.5357	11.0483	3.26109	11.9493	7.47265	1.59907	0.195021
sp|P35442|TSP2_HUMAN	THBS2	Thrombospondin-2 OS=Homo sapiens OX=9606 GN=THBS2 PE=1 SV=2	80	4	11.1067	11.2252	11.1926	11.6161	11.3478	8.54271	11.2556	7.31455	11.2835	9.45183	1.19379	0.195223
sp|Q6UVK1|CSPG4_HUMAN	CSPG4	Chondroitin sulfate proteoglycan 4 OS=Homo sapiens OX=9606 GN=CSPG4 PE=1 SV=2	451	2	7.08576	9.9435	8.0979	10.1767	9.35159	9.07706	11.8425	10.7728	8.72924	10.2012	0.855708	0.19605
sp|P68133|ACTS_HUMAN	ACTA1	Actin, alpha skeletal muscle OS=Homo sapiens OX=9606 GN=ACTA1 PE=1 SV=1	69	41	10.6367	9.53476	12.0934	11.3208	8.41072	12.0345	8.45745	8.3674	10.8551	9.19968	1.17995	0.196175
sp|P05543|THBG_HUMAN	SERPINA7	Thyroxine-binding globulin OS=Homo sapiens OX=9606 GN=SERPINA7 PE=1 SV=2	141	13	8.89752	9.27246	12.6342	13.9233	9.05201	9.59701	10.735	5.98469	10.9759	8.64333	1.26986	0.196687
sp|P13796|PLSL_HUMAN	LCP1	Plastin-2 OS=Homo sapiens OX=9606 GN=LCP1 PE=1 SV=6	188	2	9.30655	10.2379	11.8363	13.7479	9.07187	10.7973	10.6094	5.52856	11.1587	8.7062	1.28169	0.196835
sp|P81605|DCD_HUMAN_contaminant	DCD	Dermcidin OS=Homo sapiens GN=DCD PE=1 SV=2	216	2	10.2132	8.65865	14.6596	12.7126	4.55243	7.74927	12.3647	9.32818	11.3303	7.98677	1.41864	0.197026
sp|Q8N2S1|LTBP4_HUMAN	LTBP4	Latent-transforming growth factor beta-binding protein 4 OS=Homo sapiens OX=9606 GN=LTBP4 PE=1 SV=2	293	3	8.83459	10.6937	7.26371	7.72429	10.7704	9.12302	10.5476	19.0569	8.53263	11.8548	0.719762	0.19722
sp|Q13835|PKP1_HUMAN_contaminant	PKP1	Plakophilin-1 OS=Homo sapiens GN=PKP1 PE=1 SV=2	175	1	16.9443	15.5292	13.4452	9.45084	7.67075	16.7527	8.05731	4.59417	13.5224	8.30481	1.62826	0.197274
sp|A7E3W2|LG3BP_BOVIN_contaminant	LGALS3BP	Galectin-3-binding protein OS=Bos taurus GN=LGALS3BP PE=1 SV=1	108	21	9.6191	11.1561	10.3792	11.9668	10.4444	9.35648	10.631	7.35263	10.7448	9.34874	1.14933	0.198159
sp|Q9NR99|MXRA5_HUMAN	MXRA5	Matrix-remodeling-associated protein 5 OS=Homo sapiens OX=9606 GN=MXRA5 PE=1 SV=3	606	1	8.31783	7.59587	8.54509	10.4145	10.1965	8.36921	13.9585	21.6706	8.65936	12.6754	0.683163	0.199624
sp|P48307|TFPI2_HUMAN	TFPI2	Tissue factor pathway inhibitor 2 OS=Homo sapiens OX=9606 GN=TFPI2 PE=1 SV=1	357	2	9.98843	5.64212	11.8081	6.44043	13.5863	8.13926	17.454	9.59851	8.09112	11.6667	0.693525	0.200959
sp|P02538|K2C6A_HUMAN_contaminant	KRT6A	Keratin, type II cytoskeletal 6A OS=Homo sapiens GN=KRT6A PE=1 SV=3	316	5	13.6896	12.9057	13.3	9.67406	3.70127	14.6043	9.98635	4.80828	12.2789	7.13768	1.72029	0.202943
tr|Q5T0I0|Q5T0I0_HUMAN	GSN	Gelsolin (Fragment) OS=Homo sapiens OX=9606 GN=GSN PE=1 SV=1	67	1	9.09498	10.8221	10.4477	11.7655	9.79342	10.132	9.95601	7.51542	10.4878	9.28254	1.12985	0.203218
sp|Q9BXJ0|C1QT5_HUMAN	C1QTNF5	Complement C1q tumor necrosis factor-related protein 5 OS=Homo sapiens OX=9606 GN=C1QTNF5 PE=1 SV=1	151	3	9.83587	6.00282	9.18624	9.33562	15.2537	23.2953	12.1034	6.48488	8.43553	12.923	0.652753	0.203412
sp|Q9UBR2|CATZ_HUMAN	CTSZ	Cathepsin Z OS=Homo sapiens OX=9606 GN=CTSZ PE=1 SV=1	497	3	10.2633	11.7537	11.8571	12.959	11.6181	10.2926	10.0067	4.0497	11.6682	8.34341	1.39849	0.2071
sp|P06737|PYGL_HUMAN	PYGL	Glycogen phosphorylase, liver form OS=Homo sapiens OX=9606 GN=PYGL PE=1 SV=4	472	5	8.39263	10.6675	9.67028	11.5573	8.23109	10.2259	9.15331	7.70137	10.0015	8.7766	1.13956	0.207728
sp|O14786|NRP1_HUMAN	NRP1	Neuropilin-1 OS=Homo sapiens OX=9606 GN=NRP1 PE=1 SV=3	386	1	10.2902	14.9813	9.93085	13.882	10.7236	10.682	11.401	4.00659	12.074	8.50507	1.41963	0.208658
sp|P02794|FRIH_HUMAN	FTH1	Ferritin heavy chain OS=Homo sapiens OX=9606 GN=FTH1 PE=1 SV=2	468	2	7.12861	8.36779	8.02734	9.51694	8.07179	12.4901	8.3285	15.3017	8.2162	10.6466	0.771721	0.20891
sp|P02666|CASB_BOVIN_contaminant	CSN2	Beta-casein OS=Bos taurus GN=CSN2 PE=1 SV=2	418	1	6.39675	7.15869	8.33709	7.30594	11.1041	6.20788	9.21672	16.7131	7.26726	10.1511	0.715906	0.210546
sp|P01023|A2MG_HUMAN	A2M	Alpha-2-macroglobulin OS=Homo sapiens OX=9606 GN=A2M PE=1 SV=3	162	32	11.8242	12.6936	11.2484	11.2756	12.1066	10.3855	9.95636	4.96851	11.7462	8.88064	1.32267	0.215159
sp|Q93099|HGD_HUMAN	HGD	Homogentisate 1,2-dioxygenase OS=Homo sapiens OX=9606 GN=HGD PE=1 SV=2	614	1	8.65371	10.0176	9.08248	11.443	9.29946	10.5604	5.17766	5.50776	9.74266	7.27464	1.33926	0.215708
sp|P07355|ANXA2_HUMAN	ANXA2	Annexin A2 OS=Homo sapiens OX=9606 GN=ANXA2 PE=1 SV=2	45	13	15.0051	9.27548	13.0347	8.51515	8.16767	11.8206	8.87866	6.20733	11.1485	8.54078	1.30533	0.216662
sp|Q9NRV9|HEBP1_HUMAN	HEBP1	Heme-binding protein 1 OS=Homo sapiens OX=9606 GN=HEBP1 PE=1 SV=1	348	1	9.26943	7.28191	12.527	15.6466	4.95578	11.9582	4.3921	9.20884	10.7249	6.99703	1.53277	0.216697
sp|P55083|MFAP4_HUMAN	MFAP4	Microfibril-associated glycoprotein 4 OS=Homo sapiens OX=9606 GN=MFAP4 PE=1 SV=2	34	2	11.1148	6.7829	8.15227	7.85112	12.5422	17.2824	9.38986	7.89053	8.33454	11.2573	0.740365	0.217628
sp|P02769|ALBU_BOVIN_contaminant	ALB	Serum albumin OS=Bos taurus GN=ALB PE=1 SV=4	4	1738	9.43514	11.0933	9.37577	10.4616	10.838	8.22141	8.94565	8.15271	10.0659	8.97847	1.12112	0.21822
sp|O95390|GDF11_HUMAN	GDF11	Growth/differentiation factor 11 OS=Homo sapiens OX=9606 GN=GDF11 PE=1 SV=1	533	1	8.3227	8.57031	8.64519	7.72226	13.5489	22.4983	10.1678	7.40276	8.30701	12.3075	0.674957	0.218701
sp|Q14117|DPYS_HUMAN	DPYS	Dihydropyrimidinase OS=Homo sapiens OX=9606 GN=DPYS PE=1 SV=1	384	1	7.68858	7.99782	9.07434	7.66411	8.87588	12.0611	7.10199	13.9585	8.08674	10.1497	0.796745	0.219244
##sp|Q9UDY2|ZO2_HUMAN	##TJP2	####Tight junction protein ZO-2 OS=Homo sapiens OX=9606 GN=TJP2 PE=1 SV=2	464	2	9.18462	9.54581	12.9163	12.9349	8.37892	10.0829	9.86916	9.79577	11.0013	9.50655	1.15723	0.21965
sp|P04003|C4BPA_HUMAN	C4BPA	C4b-binding protein alpha chain OS=Homo sapiens OX=9606 GN=C4BPA PE=1 SV=2	637	2	7.83677	9.25486	14.829	14.9538	8.92286	10.1832	10.0469	5.6984	11.2614	8.49265	1.32602	0.220174
sp|Q07954|LRP1_HUMAN	LRP1	Prolow-density lipoprotein receptor-related protein 1 OS=Homo sapiens OX=9606 GN=LRP1 PE=1 SV=2	35	17	9.22961	10.1551	10.1574	11.5626	10.2285	10.004	9.02285	7.23569	10.243	9.04071	1.13298	0.221217
sp|P43652|AFAM_HUMAN	AFM	Afamin OS=Homo sapiens OX=9606 GN=AFM PE=1 SV=1	370	4	9.23483	9.54565	11.1122	11.6294	10.3057	8.78495	9.8548	8.62817	10.3311	9.3669	1.10294	0.221229
sp|P52209|6PGD_HUMAN	PGD	6-phosphogluconate dehydrogenase, decarboxylating OS=Homo sapiens OX=9606 GN=PGD PE=1 SV=3	78	2	11.1324	10.7094	9.65543	10.139	7.92441	12.1607	7.27208	6.29817	10.3939	8.15079	1.27521	0.221411
sp|P33908|MA1A1_HUMAN	MAN1A1	Mannosyl-oligosaccharide 1,2-alpha-mannosidase IA OS=Homo sapiens OX=9606 GN=MAN1A1 PE=1 SV=3	353	1	8.5958	9.01856	6.94695	8.51504	16.795	11.7234	12.9527	5.73388	8.22908	10.9967	0.748325	0.22145
sp|Q9H0U4|RAB1B_HUMAN	RAB1B	Ras-related protein Rab-1B OS=Homo sapiens OX=9606 GN=RAB1B PE=1 SV=1	298	3	8.50814	10.9012	9.15557	8.69691	8.43437	9.04888	7.89701	8.48458	9.27022	8.45639	1.09624	0.224946
sp|P08865|RSSA_HUMAN	RPSA	40S ribosomal protein SA OS=Homo sapiens OX=9606 GN=RPSA PE=1 SV=4	96	1	11.0855	11.3184	12.4118	9.45156	7.99402	13.2662	5.84121	7.17756	11.0146	8.16578	1.34888	0.227197
sp|Q9BZP6|CHIA_HUMAN	CHIA	Acidic mammalian chitinase OS=Homo sapiens OX=9606 GN=CHIA PE=1 SV=1	283	2	10.2865	11.8609	11.8044	13.3853	11.4933	11.1523	10.2063	4.65392	11.7832	8.83332	1.33395	0.227247
sp|P18206|VINC_HUMAN	VCL	Vinculin OS=Homo sapiens OX=9606 GN=VCL PE=1 SV=4	3	36	10.073	10.4829	10.5102	11.5999	9.75193	11.135	9.46482	6.88021	10.6519	9.17009	1.16159	0.227868
sp|P78509|RELN_HUMAN	RELN	Reelin OS=Homo sapiens OX=9606 GN=RELN PE=1 SV=3	209	16	11.2246	8.97189	8.73693	7.4233	15.4881	11.4849	13.3649	7.072	8.98985	11.387	0.789486	0.228818
sp|P53634|CATC_HUMAN	CTSC	Dipeptidyl peptidase 1 OS=Homo sapiens OX=9606 GN=CTSC PE=1 SV=2	93	4	10.0804	10.3171	12.2591	12.5166	9.98944	10.696	10.945	5.28447	11.2395	8.86635	1.26765	0.229254
sp|Q9UBG0|MRC2_HUMAN	MRC2	C-type mannose receptor 2 OS=Homo sapiens OX=9606 GN=MRC2 PE=1 SV=2	465	1	11.7031	11.5406	10.1318	11.4372	12.3594	7.9676	10.1603	5.40606	11.1849	8.57587	1.30423	0.232398
sp|Q03181|PPARD_HUMAN	PPARD	Peroxisome proliferator-activated receptor delta OS=Homo sapiens OX=9606 GN=PPARD PE=1 SV=1	315	1	9.365	9.79435	13.3106	13.9933	7.91407	11.3236	11.6679	4.44678	11.4327	8.25764	1.38451	0.232754
sp|Q9UM47|NOTC3_HUMAN	NOTCH3	Neurogenic locus notch homolog protein 3 OS=Homo sapiens OX=9606 GN=NOTCH3 PE=1 SV=2	189	1	11.2064	10.7927	6.0562	6.5882	15.6261	10.8021	6.64701	23.9455	8.33472	12.8027	0.651011	0.233912
sp|Q6YHK3|CD109_HUMAN	CD109	CD109 antigen OS=Homo sapiens OX=9606 GN=CD109 PE=1 SV=2	314	5	10.5257	11.0169	12.0771	14.14	10.8792	11.4779	10.5708	3.61471	11.8626	8.31113	1.42732	0.235175
##sp|Q9UMZ2|SYNRG_HUMAN	##SYNRG	####Synergin gamma OS=Homo sapiens OX=9606 GN=SYNRG PE=1 SV=2	429	2	11.1678	11.1233	12.8337	13.5936	10.7239	11.8493	10.8092	2.64697	12.1331	7.7651	1.56252	0.236387
sp|Q92688|AN32B_HUMAN	ANP32B	Acidic leucine-rich nuclear phosphoprotein 32 family member B OS=Homo sapiens OX=9606 GN=ANP32B PE=1 SV=1	548	1	10.4208	6.1401	12.8353	10.6819	5.61559	10.9392	7.09086	6.96025	9.67794	7.42038	1.30424	0.240512
sp|P40926|MDHM_HUMAN	MDH2	Malate dehydrogenase, mitochondrial OS=Homo sapiens OX=9606 GN=MDH2 PE=1 SV=3	467	3	13.0181	8.22609	12.6437	10.2186	8.48702	12.5068	7.50862	6.67997	10.8456	8.54199	1.26968	0.240628
sp|P17936|IBP3_HUMAN	IGFBP3	Insulin-like growth factor-binding protein 3 OS=Homo sapiens OX=9606 GN=IGFBP3 PE=1 SV=2	197	3	6.63563	6.78601	7.20235	8.74218	8.6324	6.74404	11.9002	22.469	7.29706	11.1699	0.653281	0.242808
sp|Q9UBX5|FBLN5_HUMAN	FBLN5	Fibulin-5 OS=Homo sapiens OX=9606 GN=FBLN5 PE=1 SV=1	588	3	11.1852	9.63859	7.85744	7.94546	12.9592	15.0984	11.1934	7.27502	9.05763	11.2351	0.806191	0.244357
##sp|Q9P2G4|MAP10_HUMAN	##MAP10	####Microtubule-associated protein 10 OS=Homo sapiens OX=9606 GN=MAP10 PE=1 SV=2	687	1	10.329	11.4776	12.3148	12.5586	9.23811	13.0541	9.20668	2.51405	11.6364	7.26862	1.60091	0.245487
sp|P08123|CO1A2_HUMAN	COL1A2	Collagen alpha-2(I) chain OS=Homo sapiens OX=9606 GN=COL1A2 PE=1 SV=7	136	22	8.54943	5.81037	4.20035	5.03177	6.21506	7.63088	8.09832	19.6065	5.69229	9.31545	0.611059	0.246397
sp|P13010|XRCC5_HUMAN	XRCC5	X-ray repair cross-complementing protein 5 OS=Homo sapiens OX=9606 GN=XRCC5 PE=1 SV=3	526	1	13.1528	9.72486	17.5564	10.6326	6.09856	14.7866	10.8752	3.27187	12.4307	7.52631	1.65163	0.248521
sp|P34932|HSP74_HUMAN	HSPA4	Heat shock 70 kDa protein 4 OS=Homo sapiens OX=9606 GN=HSPA4 PE=1 SV=4	574	1	11.7623	9.36513	11.174	11.2674	8.11231	13.0034	7.07192	7.34794	10.852	8.60451	1.2612	0.250832
sp|Q15223|NECT1_HUMAN	NECTIN1	Nectin-1 OS=Homo sapiens OX=9606 GN=NECTIN1 PE=1 SV=3	647	1	9.64126	9.7946	9.84998	11.4714	10.7149	10.7931	10.8159	10.8696	10.1635	10.7982	0.941218	0.251407
sp|P48163|MAOX_HUMAN	ME1	NADP-dependent malic enzyme OS=Homo sapiens OX=9606 GN=ME1 PE=1 SV=1	245	2	9.77345	11.5794	11.6459	11.6275	10.79	11.2494	9.96757	6.92821	11.1262	9.56842	1.16281	0.252209
sp|P05062|ALDOB_HUMAN	ALDOB	Fructose-bisphosphate aldolase B OS=Homo sapiens OX=9606 GN=ALDOB PE=1 SV=2	100	2	7.66929	7.71757	9.05645	9.47743	7.8094	14.3129	8.48341	11.9747	8.4425	10.3227	0.817854	0.254439
sp|P01266|THYG_HUMAN	TG	Thyroglobulin OS=Homo sapiens OX=9606 GN=TG PE=1 SV=5	55	2	12.0504	11.7591	11.0767	12.6609	13.009	10.3832	9.59843	4.36357	11.8731	8.6727	1.36902	0.25507
sp|P02753|RET4_HUMAN	RBP4	Retinol-binding protein 4 OS=Homo sapiens OX=9606 GN=RBP4 PE=1 SV=3	540	8	12.6882	13.3867	9.22612	10.2755	11.867	10.2529	9.14854	7.62173	11.2648	9.59728	1.17375	0.255837
sp|P10809|CH60_HUMAN	HSPD1	60 kDa heat shock protein, mitochondrial OS=Homo sapiens OX=9606 GN=HSPD1 PE=1 SV=2	25	1	9.70323	6.57484	15.8184	12.7513	6.37735	9.68468	10.8002	6.20796	10.6507	8.02189	1.32771	0.258807
sp|Q14982|OPCM_HUMAN	OPCML	Opioid-binding protein/cell adhesion molecule OS=Homo sapiens OX=9606 GN=OPCML PE=1 SV=1	493	1	7.55369	9.12234	7.82375	10.6745	9.24921	12.3638	7.85918	12.8806	8.70978	10.3727	0.839681	0.259858
sp|P36222|CH3L1_HUMAN	CHI3L1	Chitinase-3-like protein 1 OS=Homo sapiens OX=9606 GN=CHI3L1 PE=1 SV=2	302	6	11.2989	6.09798	9.36647	6.36934	11.6361	18.7575	10.8476	6.49851	8.00706	11.1374	0.718937	0.260904
sp|P52848|NDST1_HUMAN	NDST1	Bifunctional heparan sulfate N-deacetylase/N-sulfotransferase 1 OS=Homo sapiens OX=9606 GN=NDST1 PE=1 SV=1	1	2	5.04482	4.54253	16.8639	24.9436	4.92839	5.42603	9.84392	3.71763	9.90867	5.59314	1.77158	0.26092
sp|P04083|ANXA1_HUMAN	ANXA1	Annexin A1 OS=Homo sapiens OX=9606 GN=ANXA1 PE=1 SV=2	123	2	13.1593	8.04681	12.746	10.0743	6.42817	12.9193	8.26878	6.92142	10.7984	8.30311	1.30053	0.261531
sp|P36871|PGM1_HUMAN	PGM1	Phosphoglucomutase-1 OS=Homo sapiens OX=9606 GN=PGM1 PE=1 SV=3	555	2	8.5909	10.2713	9.9957	10.4412	8.52847	10.5182	8.98931	6.74388	9.79618	8.58741	1.14076	0.26159
sp|Q92626|PXDN_HUMAN	PXDN	Peroxidasin homolog OS=Homo sapiens OX=9606 GN=PXDN PE=1 SV=2	640	2	6.78137	8.11118	11.5828	9.61217	9.54269	8.73992	11.9064	12.9418	8.84625	10.6473	0.830846	0.263065
sp|O75369|FLNB_HUMAN	FLNB	Filamin-B OS=Homo sapiens OX=9606 GN=FLNB PE=1 SV=2	49	8	10.0433	9.35283	11.8885	12.2799	8.01368	11.2414	9.06811	10.3217	10.8214	9.58253	1.12929	0.264907
sp|P04350|TBB4A_HUMAN	TUBB4A	Tubulin beta-4A chain OS=Homo sapiens OX=9606 GN=TUBB4A PE=1 SV=2	172	1	7.91771	10.9278	9.99674	8.57987	8.18048	11.29	11.5394	19.4538	9.28149	11.9996	0.773487	0.271529
sp|Q07960|RHG01_HUMAN	ARHGAP1	Rho GTPase-activating protein 1 OS=Homo sapiens OX=9606 GN=ARHGAP1 PE=1 SV=1	474	1	16.0563	7.74173	10.8566	9.94025	7.97673	10.9921	7.2146	8.62957	10.762	8.59561	1.25204	0.272802
sp|P50454|SERPH_HUMAN	SERPINH1	Serpin H1 OS=Homo sapiens OX=9606 GN=SERPINH1 PE=1 SV=2	161	5	9.09378	7.65491	12.3238	8.66916	7.56187	8.82129	7.40022	8.51027	9.28649	8.05077	1.15349	0.27614
sp|Q9Y4D7|PLXD1_HUMAN	PLXND1	Plexin-D1 OS=Homo sapiens OX=9606 GN=PLXND1 PE=1 SV=3	523	1	6.22967	6.1105	5.26315	6.62608	7.23854	4.6824	8.30298	9.53168	6.03616	7.19666	0.838746	0.27631
sp|P55072|TERA_HUMAN	VCP	Transitional endoplasmic reticulum ATPase OS=Homo sapiens OX=9606 GN=VCP PE=1 SV=4	360	3	12.0085	8.90115	12.1271	11.2552	8.74237	12.7145	8.85402	7.16485	10.9903	9.16366	1.19934	0.276352
sp|P02461|CO3A1_HUMAN	COL3A1	Collagen alpha-1(III) chain OS=Homo sapiens OX=9606 GN=COL3A1 PE=1 SV=4	351	10	9.30293	8.06857	9.5582	10.603	10.7949	13.4399	11.978	7.8245	9.33911	10.7985	0.864851	0.277607
sp|P16930|FAAA_HUMAN	FAH	Fumarylacetoacetase OS=Homo sapiens OX=9606 GN=FAH PE=1 SV=2	154	2	7.65182	9.28104	7.68234	8.48894	7.8393	10.6331	8.62309	9.46496	8.24949	9.08196	0.908338	0.278017
##sp|P42679|MATK_HUMAN	##MATK	####Megakaryocyte-associated tyrosine-protein kinase OS=Homo sapiens OX=9606 GN=MATK PE=1 SV=1	346	1	3.42851	3.83706	16.2201	33.5876	3.24623	6.11695	8.72514	1.32476	9.20098	3.8923	2.36389	0.278386
sp|Q14956|GPNMB_HUMAN	GPNMB	Transmembrane glycoprotein NMB OS=Homo sapiens OX=9606 GN=GPNMB PE=1 SV=2	186	1	12.2943	3.90885	14.6086	5.17559	13.3267	20.8351	15.3466	5.8293	7.76391	12.5541	0.618434	0.280355
sp|P30154|2AAB_HUMAN	PPP2R1B	Serine/threonine-protein phosphatase 2A 65 kDa regulatory subunit A beta isoform OS=Homo sapiens OX=9606 GN=PPP2R1B PE=1 SV=3	558	1	11.8537	9.44807	13.5878	11.2086	5.7794	15.3874	7.46607	4.3634	11.4281	7.33654	1.5577	0.282162
sp|Q96IU4|ABHEB_HUMAN	ABHD14B	Protein ABHD14B OS=Homo sapiens OX=9606 GN=ABHD14B PE=1 SV=1	381	1	7.60351	11.1349	7.20049	7.97813	8.21928	13.9362	7.42419	14.3237	8.35105	10.5056	0.794914	0.282682
sp|Q92820|GGH_HUMAN	GGH	Gamma-glutamyl hydrolase OS=Homo sapiens OX=9606 GN=GGH PE=1 SV=2	511	5	10.7525	11.6145	11.1995	11.5534	11.4628	11.5806	9.16708	5.63964	11.2747	9.10177	1.23874	0.282982
sp|Q15417|CNN3_HUMAN	CNN3	Calponin-3 OS=Homo sapiens OX=9606 GN=CNN3 PE=1 SV=1	550	1	13.0281	7.71586	18.0171	12.4841	6.30407	13.6622	11.4808	6.78118	12.2624	9.04909	1.3551	0.285572
sp|Q9H299|SH3L3_HUMAN	SH3BGRL3	SH3 domain-binding glutamic acid-rich-like protein 3 OS=Homo sapiens OX=9606 GN=SH3BGRL3 PE=1 SV=1	677	1	8.49796	8.91957	7.84051	8.44338	7.73659	11.5637	8.22928	15.5627	8.41647	10.346	0.813498	0.28561
sp|P00738|HPT_HUMAN	HP	Haptoglobin OS=Homo sapiens OX=9606 GN=HP PE=1 SV=1	427	1	9.04142	10.2326	10.8259	10.2926	8.8944	8.53335	8.2331	11.1112	10.0763	9.12831	1.10386	0.286065
sp|P0DP25|CALM3_HUMAN	CALM3	Calmodulin-3 OS=Homo sapiens OX=9606 GN=CALM3 PE=1 SV=1	649	1	12.1753	6.69735	6.32373	5.55838	6.40351	14.8648	7.98713	31.7295	7.31688	12.4626	0.587108	0.286353
sp|P61160|ARP2_HUMAN	ACTR2	Actin-related protein 2 OS=Homo sapiens OX=9606 GN=ACTR2 PE=1 SV=1	441	1	12.4002	10.8734	12.4131	12.8466	8.95059	15.2353	8.27004	4.80278	12.1092	8.57878	1.41153	0.286907
sp|P02754|LACB_BOVIN_contaminant	LGB	Beta-lactoglobulin OS=Bos taurus GN=LGB PE=1 SV=3	626	1	5.99168	5.70254	9.7843	10.867	7.05029	10.1225	10.1411	18.8461	7.76362	10.8069	0.718396	0.286962
sp|Q7Z794|K2C1B_HUMAN_contaminant	KRT77	Keratin, type II cytoskeletal 1b OS=Homo sapiens GN=KRT77 PE=1 SV=3	316	2	17.0655	10.784	14.6146	8.48295	5.43457	7.21574	17.4324	3.54344	12.2902	7.01548	1.75187	0.288294
sp|P02511|CRYAB_HUMAN	CRYAB	Alpha-crystallin B chain OS=Homo sapiens OX=9606 GN=CRYAB PE=1 SV=2	130	1	12.3106	6.02133	13.0667	15.903	5.27568	12.0121	9.18225	9.06054	11.1405	8.52119	1.30739	0.290138
sp|P35527|K1C9_HUMAN_contaminant	KRT9	Keratin, type I cytoskeletal 9 OS=Homo sapiens GN=KRT9 PE=1 SV=3	37	85	13.5103	12.3841	12.4677	8.90477	4.90314	7.69465	15.2697	7.54668	11.6744	8.12012	1.43771	0.290296
sp|A8MV23|SERP3_HUMAN	SERPINE3	Serpin E3 OS=Homo sapiens OX=9606 GN=SERPINE3 PE=2 SV=2	44	8	10.3679	7.29353	6.88821	6.17488	14.2461	35.2422	7.5391	7.19102	7.5308	12.8445	0.586305	0.294777
sp|Q8N1N4|K2C78_HUMAN_contaminant	KRT78	Keratin, type II cytoskeletal 78 OS=Homo sapiens GN=KRT78 PE=2 SV=2	159	4	13.1685	10.4063	11.9667	10.1144	6.3133	8.7348	13.5373	9.15126	11.3485	9.0914	1.24826	0.295936
sp|P09382|LEG1_HUMAN	LGALS1	Galectin-1 OS=Homo sapiens OX=9606 GN=LGALS1 PE=1 SV=2	604	1	10.7617	10.7195	9.06468	11.2755	6.80344	9.30008	11.1106	9.80147	10.4204	9.11089	1.14373	0.297106
tr|G5E9Q6|G5E9Q6_HUMAN	PFN2	Profilin OS=Homo sapiens OX=9606 GN=PFN2 PE=1 SV=1	121	1	10.9007	9.12804	7.01219	8.8091	6.8218	10.7696	5.63436	6.05529	8.8543	7.0757	1.25137	0.297185
sp|Q14195|DPYL3_HUMAN	DPYSL3	Dihydropyrimidinase-related protein 3 OS=Homo sapiens OX=9606 GN=DPYSL3 PE=1 SV=1	384	2	8.91182	12.6476	9.92075	10.0482	7.2308	12.0946	7.41313	8.42323	10.2956	8.59636	1.19767	0.298754
sp|Q13103|SPP24_HUMAN	SPP2	Secreted phosphoprotein 24 OS=Homo sapiens OX=9606 GN=SPP2 PE=1 SV=1	665	1	8.72712	10.8735	9.75259	11.3283	9.05	7.16099	8.50085	11.2468	10.1189	8.87214	1.14052	0.301375
sp|Q9BXJ4|C1QT3_HUMAN	C1QTNF3	Complement C1q tumor necrosis factor-related protein 3 OS=Homo sapiens OX=9606 GN=C1QTNF3 PE=1 SV=1	565	1	9.70882	11.1484	11.4433	15.876	10.1471	9.32478	7.40746	13.2707	11.8418	9.82055	1.20582	0.309657
sp|P31939|PUR9_HUMAN	ATIC	Bifunctional purine biosynthesis protein PURH OS=Homo sapiens OX=9606 GN=ATIC PE=1 SV=3	65	1	8.89788	8.00809	10.0504	11.1285	8.54309	10.0367	6.93526	8.45289	9.44841	8.42012	1.12212	0.310505
sp|Q16555|DPYL2_HUMAN	DPYSL2	Dihydropyrimidinase-related protein 2 OS=Homo sapiens OX=9606 GN=DPYSL2 PE=1 SV=1	428	2	10.3778	10.4975	9.75509	11.1338	6.49783	8.7056	9.62183	11.6767	10.4296	8.92866	1.1681	0.311965
sp|Q99460|PSMD1_HUMAN	PSMD1	26S proteasome non-ATPase regulatory subunit 1 OS=Homo sapiens OX=9606 GN=PSMD1 PE=1 SV=2	271	1	7.42578	8.92317	8.64538	13.0871	7.05744	9.48015	7.35805	7.99928	9.30512	7.92171	1.17464	0.312809
sp|P29401|TKT_HUMAN	TKT	Transketolase OS=Homo sapiens OX=9606 GN=TKT PE=1 SV=3	330	6	12.9871	9.12985	12.7988	7.59465	9.26835	10.219	7.28049	8.99157	10.3613	8.87364	1.16765	0.314572
sp|Q15149|PLEC_HUMAN	PLEC	Plectin OS=Homo sapiens OX=9606 GN=PLEC PE=1 SV=3	279	2	9.0785	7.73431	13.0159	13.0875	8.16916	11.0278	9.79764	6.45791	10.4578	8.689	1.20357	0.315961
sp|P07437|TBB5_HUMAN	TUBB	Tubulin beta chain OS=Homo sapiens OX=9606 GN=TUBB PE=1 SV=2	172	6	10.2546	9.85375	10.0118	11.7803	6.65817	10.836	8.69466	10.7664	10.4483	9.0654	1.15255	0.31702
sp|Q8N3T6|T132C_HUMAN	TMEM132C	Transmembrane protein 132C OS=Homo sapiens OX=9606 GN=TMEM132C PE=2 SV=3	338	1	10.7642	11.7832	10.7976	12.7401	10.3933	11.9589	10.8002	2.43785	11.4931	7.56347	1.51955	0.317448
sp|P30086|PEBP1_HUMAN	PEBP1	Phosphatidylethanolamine-binding protein 1 OS=Homo sapiens OX=9606 GN=PEBP1 PE=1 SV=3	343	5	10.111	8.0724	9.31236	8.11117	8.33039	14.0043	7.38238	16.2851	8.86105	10.8825	0.814248	0.318903
sp|P51884|LUM_HUMAN	LUM	Lumican OS=Homo sapiens OX=9606 GN=LUM PE=1 SV=2	476	9	11.0288	12.382	9.7815	11.2053	10.8295	11.3067	10.3041	6.92331	11.0608	9.66756	1.14412	0.319288
sp|P31151|S10A7_HUMAN_contaminant	S100A7	Protein S100-A7 OS=Homo sapiens GN=S100A7 PE=1 SV=4	434	8	9.83033	6.98941	10.6728	5.60014	3.57896	22.1548	13.812	11.9431	8.00519	10.6942	0.748552	0.320418
sp|P04899|GNAI2_HUMAN	GNAI2	Guanine nucleotide-binding protein G(i) subunit alpha-2 OS=Homo sapiens OX=9606 GN=GNAI2 PE=1 SV=3	564	1	12.9764	9.81672	13.1152	11.3748	12.1478	12.5446	9.02042	3.71472	11.7411	8.45331	1.38894	0.324171
sp|Q02818|NUCB1_HUMAN	NUCB1	Nucleobindin-1 OS=Homo sapiens OX=9606 GN=NUCB1 PE=1 SV=4	246	1	10.5661	8.68694	5.19615	11.01	9.21056	8.55128	10.8497	19.4718	8.51261	11.3576	0.74951	0.324243
sp|P20849|CO9A1_HUMAN	COL9A1	Collagen alpha-1(IX) chain OS=Homo sapiens OX=9606 GN=COL9A1 PE=1 SV=3	483	1	9.71518	11.9984	9.69139	11.7703	10.9601	10.1054	10.2351	8.08428	10.7383	9.7842	1.09752	0.324253
sp|P00746|CFAD_HUMAN	CFD	Complement factor D OS=Homo sapiens OX=9606 GN=CFD PE=1 SV=5	593	2	8.06471	9.59592	10.7174	13.9813	8.08702	10.4907	10.3064	6.89246	10.3771	8.81087	1.17777	0.327974
sp|P61586|RHOA_HUMAN	RHOA	Transforming protein RhoA OS=Homo sapiens OX=9606 GN=RHOA PE=1 SV=1	469	2	12.2522	8.58689	12.0578	11.2135	9.98777	11.7911	8.26465	9.2957	10.9211	9.75287	1.11978	0.330054
sp|P21980|TGM2_HUMAN	TGM2	Protein-glutamine gamma-glutamyltransferase 2 OS=Homo sapiens OX=9606 GN=TGM2 PE=1 SV=2	561	3	10.0065	15.1073	9.24045	10.8407	10.2101	11.2659	7.50477	9.60193	11.0931	9.54164	1.1626	0.33038
sp|P02100|HBE_HUMAN	HBE1	Hemoglobin subunit epsilon OS=Homo sapiens OX=9606 GN=HBE1 PE=1 SV=2	530	1	1.28743	1.37498	21.7397	26.9054	0.88344	4.09209	8.2184	6.78064	5.67255	3.76743	1.50568	0.331705
sp|P16112|PGCA_HUMAN	ACAN	Aggrecan core protein OS=Homo sapiens OX=9606 GN=ACAN PE=1 SV=3	311	4	9.0928	8.88032	12.7415	11.7315	9.0273	10.8807	9.36652	8.42844	10.4815	9.38394	1.11697	0.331707
sp|P04732|MT1E_HUMAN	MT1E	Metallothionein-1E OS=Homo sapiens OX=9606 GN=MT1E PE=1 SV=1	191	2	2.23958	5.32294	7.06609	4.7419	2.49391	10.4567	5.46182	34.1099	4.47057	8.34879	0.535475	0.333284
sp|P01706|LV211_HUMAN	IGLV2-11	Immunoglobulin lambda variable 2-11 OS=Homo sapiens OX=9606 GN=IGLV2-11 PE=1 SV=2	579	6	8.63491	8.79899	14.2705	14.8847	9.24017	12.0162	10.2203	6.36201	11.2711	9.21778	1.22276	0.335437
sp|P35579|MYH9_HUMAN	MYH9	Myosin-9 OS=Homo sapiens OX=9606 GN=MYH9 PE=1 SV=4	82	9	9.67899	9.39592	11.1564	14.8484	7.7812	11.288	9.8495	9.97905	11.0788	9.63922	1.14935	0.336525
sp|P09493|TPM1_HUMAN	TPM1	Tropomyosin alpha-1 chain OS=Homo sapiens OX=9606 GN=TPM1 PE=1 SV=2	157	8	11.2218	8.37826	12.2684	9.8029	6.71528	7.64836	7.5162	12.8405	10.3119	8.3908	1.22896	0.337903
sp|O75828|CBR3_HUMAN	CBR3	Carbonyl reductase [NADPH] 3 OS=Homo sapiens OX=9606 GN=CBR3 PE=1 SV=3	362	1	9.39368	11.0785	8.56456	15.6012	7.86108	11.8352	10.3848	6.1013	10.8591	8.76233	1.2393	0.338437
sp|P38646|GRP75_HUMAN	HSPA9	Stress-70 protein, mitochondrial OS=Homo sapiens OX=9606 GN=HSPA9 PE=1 SV=2	133	2	11.623	8.5642	13.1743	11.7568	6.96908	13.8592	7.8284	8.83345	11.1431	9.04023	1.23261	0.343014
sp|P13942|COBA2_HUMAN	COL11A2	Collagen alpha-2(XI) chain OS=Homo sapiens OX=9606 GN=COL11A2 PE=1 SV=5	109	1	6.01469	8.61819	11.1565	16.0055	7.23776	8.77475	8.24867	7.95759	9.80859	8.03528	1.22069	0.34406
sp|P06733|ENOA_HUMAN	ENO1	Alpha-enolase OS=Homo sapiens OX=9606 GN=ENO1 PE=1 SV=2	27	19	12.7363	11.224	8.8937	9.98324	8.79182	11.9336	9.08458	8.2268	10.6142	9.41015	1.12795	0.344412
sp|P05452|TETN_HUMAN	CLEC3B	Tetranectin OS=Homo sapiens OX=9606 GN=CLEC3B PE=1 SV=3	325	8	9.44007	8.83482	13.4906	14.8866	8.9781	12.1018	11.7434	4.02907	11.3763	8.46756	1.34351	0.346041
sp|Q16851|UGPA_HUMAN	UGP2	UTP--glucose-1-phosphate uridylyltransferase OS=Homo sapiens OX=9606 GN=UGP2 PE=1 SV=5	435	2	10.4239	9.61922	10.621	11.848	9.30403	12.0952	7.67619	9.0879	10.5985	9.4129	1.12596	0.346974
sp|P61204|ARF3_HUMAN	ARF3	ADP-ribosylation factor 3 OS=Homo sapiens OX=9606 GN=ARF3 PE=1 SV=2	477	1	11.0986	8.40915	11.2726	10.8173	8.8924	12.8479	7.38426	4.55861	10.3286	7.87495	1.31158	0.347439
sp|P13640|MT1G_HUMAN	MT1G	Metallothionein-1G OS=Homo sapiens OX=9606 GN=MT1G PE=1 SV=2	191	1	4.52162	6.63443	7.77286	5.5821	4.47334	9.89563	6.2362	29.5494	6.00647	9.50355	0.632023	0.349305
sp|Q9Y5C1|ANGL3_HUMAN	ANGPTL3	Angiopoietin-related protein 3 OS=Homo sapiens OX=9606 GN=ANGPTL3 PE=1 SV=1	423	1	9.1389	11.0096	11.1668	12.6933	10.0378	10.725	10.6435	9.23401	10.928	10.1421	1.07749	0.35119
sp|P26639|SYTC_HUMAN	TARS1	Threonine--tRNA ligase 1, cytoplasmic OS=Homo sapiens OX=9606 GN=TARS1 PE=1 SV=3	503	1	13.7413	8.11408	13.2947	10.9014	9.80502	13.4385	8.5687	6.38603	11.2748	9.21481	1.22355	0.356416
sp|O14950|ML12B_HUMAN	MYL12B	Myosin regulatory light chain 12B OS=Homo sapiens OX=9606 GN=MYL12B PE=1 SV=2	236	3	8.96762	7.50692	14.9812	14.0039	5.7068	12.5187	9.10567	8.86163	10.9014	8.71353	1.25109	0.356968
sp|P63010|AP2B1_HUMAN	AP2B1	AP-2 complex subunit beta OS=Homo sapiens OX=9606 GN=AP2B1 PE=1 SV=1	489	1	12.5372	11.0485	12.4829	12.8293	8.60658	16.3039	8.96389	3.72286	12.2041	8.27225	1.4753	0.357271
sp|P61158|ARP3_HUMAN	ACTR3	Actin-related protein 3 OS=Homo sapiens OX=9606 GN=ACTR3 PE=1 SV=3	52	2	9.59957	9.12146	7.35997	7.64363	8.47833	9.50515	5.78541	5.08248	8.37766	6.97702	1.20075	0.358358
sp|Q08554|DSC1_HUMAN_contaminant	DSC1	Desmocollin-1 OS=Homo sapiens GN=DSC1 PE=1 SV=2	480	2	11.5627	10.8221	11.1545	8.44767	8.12209	7.14858	10.033	11.723	10.4205	9.09053	1.1463	0.358643
sp|Q04721|NOTC2_HUMAN	NOTCH2	Neurogenic locus notch homolog protein 2 OS=Homo sapiens OX=9606 GN=NOTCH2 PE=1 SV=3	642	1	9.36611	10.0247	6.76283	8.46604	13.4331	9.34965	5.58785	17.5676	8.56268	10.5374	0.812602	0.359211
sp|O75083|WDR1_HUMAN	WDR1	WD repeat-containing protein 1 OS=Homo sapiens OX=9606 GN=WDR1 PE=1 SV=4	280	2	14.0473	9.66933	9.58733	9.16702	8.90534	12.6447	7.96188	5.51442	10.4527	8.3853	1.24655	0.361067
##tr|E7ESF4|E7ESF4_HUMAN	##PLAT	####Plasminogen activator OS=Homo sapiens OX=9606 GN=PLAT PE=1 SV=1	602	2	8.36997	7.46837	15.0082	16.8169	6.99142	12.5247	11.8652	4.00217	11.2074	8.03019	1.39566	0.361316
sp|P16070|CD44_HUMAN	CD44	CD44 antigen OS=Homo sapiens OX=9606 GN=CD44 PE=1 SV=3	612	2	8.31919	9.15438	8.68624	10.6075	9.38578	9.47717	9.17015	12.0451	9.15248	9.95598	0.919295	0.367552
sp|Q16610|ECM1_HUMAN	ECM1	Extracellular matrix protein 1 OS=Homo sapiens OX=9606 GN=ECM1 PE=1 SV=2	339	1	7.27856	5.92573	8.9919	8.26599	5.87223	8.67186	12.8491	9.43474	7.5246	8.86399	0.848895	0.368335
sp|P15924|DESP_HUMAN_contaminant	DSP	Desmoplakin OS=Homo sapiens GN=DSP PE=1 SV=3	95	9	12.0211	11.2398	10.9934	9.0998	6.12944	9.98909	12.352	9.17271	10.7824	9.12631	1.18147	0.369543
sp|Q6W4X9|MUC6_HUMAN	MUC6	Mucin-6 OS=Homo sapiens OX=9606 GN=MUC6 PE=1 SV=3	437	1	10.7622	8.27311	10.7176	12.559	10.1521	11.3922	9.17408	5.74587	10.463	8.8363	1.18409	0.370048
tr|B4E1Z4|B4E1Z4_HUMAN		cDNA FLJ55673, highly similar to Complement factor B OS=Homo sapiens OX=9606 PE=1 SV=1	169	6	5.32966	5.75105	5.91529	6.4356	6.61178	5.99204	6.05308	38.393	5.84457	9.79559	0.596654	0.372971
sp|Q15113|PCOC1_HUMAN	PCOLCE	Procollagen C-endopeptidase enhancer 1 OS=Homo sapiens OX=9606 GN=PCOLCE PE=1 SV=2	401	3	9.71356	9.05205	8.24449	10.1492	8.64044	10.8737	8.98821	13.0514	9.26148	10.2462	0.903898	0.373113
sp|Q13838|DX39B_HUMAN	DDX39B	Spliceosome RNA helicase DDX39B OS=Homo sapiens OX=9606 GN=DDX39B PE=1 SV=1	230	2	11.9734	6.55049	15.3441	10.7749	7.62124	13.7353	7.12601	6.69547	10.6712	8.40665	1.26937	0.373312
sp|P15291|B4GT1_HUMAN	B4GALT1	Beta-1,4-galactosyltransferase 1 OS=Homo sapiens OX=9606 GN=B4GALT1 PE=1 SV=5	586	2	5.77548	8.08825	6.67704	10.163	6.88117	7.45174	9.44315	17.4359	7.50347	9.58562	0.782784	0.37423
sp|P07148|FABPL_HUMAN	FABP1	Fatty acid-binding protein, liver OS=Homo sapiens OX=9606 GN=FABP1 PE=1 SV=1	438	3	6.67595	7.12429	7.89795	9.5656	6.4729	15.8592	5.67088	14.1827	7.74231	9.53229	0.812219	0.377191
sp|P02675|FIBB_HUMAN	FGB	Fibrinogen beta chain OS=Homo sapiens OX=9606 GN=FGB PE=1 SV=2	291	5	8.12117	9.88002	10.6623	12.3831	8.4046	11.315	9.07945	7.79762	10.1453	9.05833	1.11999	0.379609
sp|Q9H3G5|CPVL_HUMAN	CPVL	Probable serine carboxypeptidase CPVL OS=Homo sapiens OX=9606 GN=CPVL PE=1 SV=2	313	1	7.42592	8.13707	9.53114	8.85933	13.268	13.5664	7.8737	6.68555	8.45164	9.86612	0.856632	0.380162
sp|P46531|NOTC1_HUMAN	NOTCH1	Neurogenic locus notch homolog protein 1 OS=Homo sapiens OX=9606 GN=NOTCH1 PE=1 SV=4	87	1	7.91543	10.243	7.95175	10.6067	11.0192	8.65661	8.81225	13.013	9.09361	10.2268	0.889192	0.383098
sp|P26038|MOES_HUMAN	MSN	Moesin OS=Homo sapiens OX=9606 GN=MSN PE=1 SV=3	104	7	9.36371	9.08396	9.0097	9.69684	8.41623	12.128	8.79639	11.8078	9.28466	10.1472	0.915	0.383358
sp|P01040|CYTA_HUMAN_contaminant	CSTA	Cystatin-A OS=Homo sapiens GN=CSTA PE=1 SV=1	629	2	12.578	7.2052	18.3462	12.177	4.13137	12.0297	15.5434	5.16406	11.9285	7.94734	1.50094	0.383576
sp|Q13813|SPTN1_HUMAN	SPTAN1	Spectrin alpha chain, non-erythrocytic 1 OS=Homo sapiens OX=9606 GN=SPTAN1 PE=1 SV=3	210	2	2.40013	1.56133	19.5516	27.4673	1.34908	9.88051	11.3842	1.11408	6.6978	3.60586	1.85747	0.383666
sp|O00231|PSD11_HUMAN	PSMD11	26S proteasome non-ATPase regulatory subunit 11 OS=Homo sapiens OX=9606 GN=PSMD11 PE=1 SV=3	668	1	10.3271	6.24029	10.3692	10.8739	6.62196	15.1774	9.57709	16.1971	9.23269	11.1741	0.826256	0.384867
sp|P00740|FA9_HUMAN	F9	Coagulation factor IX OS=Homo sapiens OX=9606 GN=F9 PE=1 SV=2	600	1	9.7325	13.0731	9.79013	10.6655	10.3232	8.17516	6.15853	12.5512	10.736	8.98707	1.19461	0.385314
sp|O95498|VNN2_HUMAN	VNN2	Vascular non-inflammatory molecule 2 OS=Homo sapiens OX=9606 GN=VNN2 PE=1 SV=3	261	5	10.9097	13.549	8.67107	8.85546	11.611	7.87549	9.53089	7.43635	10.3217	8.97243	1.15038	0.387183
sp|Q12792|TWF1_HUMAN	TWF1	Twinfilin-1 OS=Homo sapiens OX=9606 GN=TWF1 PE=1 SV=3	683	1	11.5	9.46807	10.5131	10.6654	8.62652	12.6742	8.36444	7.91348	10.5116	9.22338	1.13966	0.3898
sp|Q15274|NADC_HUMAN	QPRT	Nicotinate-nucleotide pyrophosphorylase [carboxylating] OS=Homo sapiens OX=9606 GN=QPRT PE=1 SV=3	681	1	10.5891	10.1281	12.2715	8.84422	10.6587	10.4075	9.08348	8.34818	10.3869	9.57687	1.08458	0.389917
sp|P05089|ARGI1_HUMAN_contaminant	ARG1	Arginase-1 OS=Homo sapiens GN=ARG1 PE=1 SV=2	274	2	11.405	10.71	13.181	9.90936	6.96116	15.9719	7.74055	4.33905	11.2388	7.8172	1.4377	0.391935
sp|O75914|PAK3_HUMAN	PAK3	Serine/threonine-protein kinase PAK 3 OS=Homo sapiens OX=9606 GN=PAK3 PE=1 SV=2	508	1	9.42812	9.48102	5.89626	6.4143	13.4346	7.15819	4.49864	20.8999	7.6252	9.75132	0.781967	0.392098
sp|Q9NTU7|CBLN4_HUMAN	CBLN4	Cerebellin-4 OS=Homo sapiens OX=9606 GN=CBLN4 PE=1 SV=1	431	1	7.50698	9.56818	11.2834	12.9259	7.95575	10.1169	9.23856	9.21038	10.1169	9.09709	1.11211	0.394487
sp|P18065|IBP2_HUMAN	IGFBP2	Insulin-like growth factor-binding protein 2 OS=Homo sapiens OX=9606 GN=IGFBP2 PE=1 SV=2	212	12	9.11349	9.03565	9.74303	10.0231	8.91868	8.9842	10.5977	16.8743	9.46967	10.9409	0.865527	0.396478
sp|Q13867|BLMH_HUMAN	BLMH	Bleomycin hydrolase OS=Homo sapiens OX=9606 GN=BLMH PE=1 SV=1	132	3	11.803	10.1214	15.0988	8.91703	7.91545	12.1855	12.6301	4.71382	11.2616	8.70512	1.29367	0.396656
sp|P08238|HS90B_HUMAN	HSP90AB1	Heat shock protein HSP 90-beta OS=Homo sapiens OX=9606 GN=HSP90AB1 PE=1 SV=4	39	4	10.5561	11.1643	9.18225	10.8721	9.05295	13	7.75344	5.98611	10.4148	8.59693	1.21145	0.396954
sp|P02749|APOH_HUMAN	APOH	Beta-2-glycoprotein 1 OS=Homo sapiens OX=9606 GN=APOH PE=1 SV=3	198	5	9.90368	10.1539	10.3076	10.5812	10.1225	8.4566	10.4996	10.0578	10.2336	9.75079	1.04952	0.400366
sp|P00761|TRYP_PIG_contaminant		Trypsin OS=Sus scrofa PE=1 SV=1	473	102	2.88494	3.62324	11.7592	11.7173	2.90407	8.70735	12.4557	27.7935	6.16041	9.67278	0.636882	0.400746
sp|P12955|PEPD_HUMAN	PEPD	Xaa-Pro dipeptidase OS=Homo sapiens OX=9606 GN=PEPD PE=1 SV=3	616	2	8.76476	9.73414	9.17703	13.6821	9.74636	8.94734	10.1139	7.93594	10.1736	9.14668	1.11227	0.400833
sp|P0CG29|GST2_HUMAN	GSTT2	Glutathione S-transferase theta-2 OS=Homo sapiens OX=9606 GN=GSTT2 PE=1 SV=1	181	1	13.2605	7.58194	9.15038	9.36313	6.96908	12.6758	7.07668	5.37812	9.63386	7.6147	1.26517	0.402531
sp|P28827|PTPRM_HUMAN	PTPRM	Receptor-type tyrosine-protein phosphatase mu OS=Homo sapiens OX=9606 GN=PTPRM PE=1 SV=2	400	2	10.5029	10.074	10.5613	12.2985	10.8134	11.5407	10.0088	6.92531	10.8273	9.64393	1.12271	0.406087
sp|O43390|HNRPR_HUMAN	HNRNPR	Heterogeneous nuclear ribonucleoprotein R OS=Homo sapiens OX=9606 GN=HNRNPR PE=1 SV=1	278	1	6.89751	7.39082	7.35943	10.579	9.37026	7.77277	7.30427	14.873	7.93722	9.43139	0.841575	0.407138
tr|B1ALD9|B1ALD9_HUMAN	POSTN	Periostin OS=Homo sapiens OX=9606 GN=POSTN PE=1 SV=1	237	1	7.90863	8.02536	6.09269	8.94304	7.03762	6.77371	9.45069	17.0884	7.66858	9.36708	0.818673	0.407614
sp|P28074|PSB5_HUMAN	PSMB5	Proteasome subunit beta type-5 OS=Homo sapiens OX=9606 GN=PSMB5 PE=1 SV=3	156	1	12.0535	8.85416	13.4754	12.7278	8.00662	14.0426	11.6286	5.84192	11.6316	9.34856	1.24421	0.40888
sp|Q9HAU5|RENT2_HUMAN	UPF2	Regulator of nonsense transcripts 2 OS=Homo sapiens OX=9606 GN=UPF2 PE=1 SV=1	454	2	3.13972	9.01342	2.74239	4.1232	5.63119	1.41495	6.06647	41.2255	4.22947	6.6813	0.633031	0.41328
sp|O00533|NCHL1_HUMAN	CHL1	Neural cell adhesion molecule L1-like protein OS=Homo sapiens OX=9606 GN=CHL1 PE=1 SV=4	460	1	9.4837	8.84417	8.32746	9.77418	10.2911	8.03124	13.622	9.12314	9.08985	10.0672	0.902921	0.415028
sp|P13929|ENOB_HUMAN	ENO3	Beta-enolase OS=Homo sapiens OX=9606 GN=ENO3 PE=1 SV=5	27	3	11.7916	10.0094	8.81984	9.73095	11.1577	9.80215	6.83279	8.64601	10.0323	8.96556	1.11898	0.415432
sp|P02647|APOA1_HUMAN	APOA1	Apolipoprotein A-I OS=Homo sapiens OX=9606 GN=APOA1 PE=1 SV=1	323	5	4.95793	4.5171	17.0979	19.1636	4.90074	10.7212	9.87726	5.03765	9.2554	7.1506	1.29435	0.416343
sp|P23526|SAHH_HUMAN	AHCY	Adenosylhomocysteinase OS=Homo sapiens OX=9606 GN=AHCY PE=1 SV=4	73	10	8.38995	9.97755	10.2143	11.3732	7.024	13.3021	6.95435	6.31103	9.93044	8.00231	1.24095	0.417827
sp|P29972|AQP1_HUMAN	AQP1	Aquaporin-1 OS=Homo sapiens OX=9606 GN=AQP1 PE=1 SV=3	675	1	5.91253	11.8478	7.5039	11.1649	10.8571	7.99933	11.0231	12.57	8.75262	10.4737	0.835673	0.419383
sp|Q01813|PFKAP_HUMAN	PFKP	ATP-dependent 6-phosphofructokinase, platelet type OS=Homo sapiens OX=9606 GN=PFKP PE=1 SV=2	90	1	14.5864	6.99508	10.2259	14.9503	6.68199	10.6141	13.3083	7.83051	11.1757	9.27204	1.20531	0.422736
sp|P05186|PPBT_HUMAN	ALPL	Alkaline phosphatase, tissue-nonspecific isozyme OS=Homo sapiens OX=9606 GN=ALPL PE=1 SV=4	398	2	9.15614	10.1036	8.31035	13.9104	9.6649	9.73943	7.93823	9.49007	10.1692	9.17658	1.10817	0.427985
sp|Q15746|MYLK_HUMAN	MYLK	Myosin light chain kinase, smooth muscle OS=Homo sapiens OX=9606 GN=MYLK PE=1 SV=4	462	2	7.11202	8.96642	7.84296	9.37182	6.48869	9.59035	8.85978	15.0895	8.27426	9.55042	0.866377	0.430471
sp|P35580|MYH10_HUMAN	MYH10	Myosin-10 OS=Homo sapiens OX=9606 GN=MYH10 PE=1 SV=3	82	5	11.1146	10.2479	12.1417	10.1719	8.26647	10.3963	7.34546	12.9719	10.8906	9.51273	1.14485	0.430678
sp|Q15262|PTPRK_HUMAN	PTPRK	Receptor-type tyrosine-protein phosphatase kappa OS=Homo sapiens OX=9606 GN=PTPRK PE=1 SV=2	562	3	6.83541	9.42505	9.28667	10.6416	8.0497	10.4768	9.53981	12.0083	8.93262	9.91419	0.900993	0.431221
sp|P04632|CPNS1_HUMAN	CAPNS1	Calpain small subunit 1 OS=Homo sapiens OX=9606 GN=CAPNS1 PE=1 SV=1	685	1	8.9812	10.9362	8.05019	7.73597	9.24696	9.77689	8.24398	12.1197	8.84363	9.74893	0.907138	0.432131
sp|P23470|PTPRG_HUMAN	PTPRG	Receptor-type tyrosine-protein phosphatase gamma OS=Homo sapiens OX=9606 GN=PTPRG PE=1 SV=4	439	1	6.88327	7.81807	15.965	17.4776	6.75691	13.5499	12.6874	2.41451	11.0697	7.27732	1.52112	0.432652
sp|Q14240|IF4A2_HUMAN	EIF4A2	Eukaryotic initiation factor 4A-II OS=Homo sapiens OX=9606 GN=EIF4A2 PE=1 SV=2	442	4	9.31643	9.51664	10.7371	11.016	7.68158	11.4496	9.65514	8.6738	10.1195	9.26408	1.09234	0.433043
tr|A0A087WTF6|A0A087WTF6_HUMAN	NCAM1	Neural cell adhesion molecule 1 OS=Homo sapiens OX=9606 GN=NCAM1 PE=1 SV=1	242	10	9.40644	10.4637	10.3655	11.5781	9.67435	10.032	11.0269	9.03333	10.4252	9.9158	1.05137	0.433068
sp|P21810|PGS1_HUMAN	BGN	Biglycan OS=Homo sapiens OX=9606 GN=BGN PE=1 SV=2	251	3	8.57679	7.74629	8.798	8.36896	8.08717	5.93963	10.7218	19.4708	8.36312	10.007	0.835731	0.433633
sp|P31025|LCN1_HUMAN_contaminant	LCN1	Lipocalin-1 OS=Homo sapiens GN=LCN1 PE=1 SV=1	576	1	5.75326	5.83695	33.4839	11.678	1.98869	4.72377	20.7634	2.74307	10.7047	4.80948	2.22576	0.439632
sp|Q9HWK6|LYSC_PSEAE_contaminant	prpL	Lysyl endopeptidase OS=Pseudomonas aeruginosa GN=prpL PE=1 SV=1	19	146	2.76597	3.55944	11.8459	13.1772	2.96536	9.0083	12.2313	25.0533	6.26116	9.51184	0.65825	0.44563
sp|P14735|IDE_HUMAN	IDE	Insulin-degrading enzyme OS=Homo sapiens OX=9606 GN=IDE PE=1 SV=4	327	1	6.81328	9.77602	8.1905	8.36698	9.19651	9.81913	8.7106	7.83784	8.21958	8.86105	0.927607	0.446789
sp|P11362|FGFR1_HUMAN	FGFR1	Fibroblast growth factor receptor 1 OS=Homo sapiens OX=9606 GN=FGFR1 PE=1 SV=3	365	8	9.006	10.0884	6.12407	7.34235	10.6581	6.61527	6.25845	22.1304	7.9948	9.94079	0.804242	0.44743
sp|Q5QNW6|H2B2F_HUMAN	HIST2H2BF	Histone H2B type 2-F OS=Homo sapiens OX=9606 GN=HIST2H2BF PE=1 SV=3	331	4	6.77232	6.44668	12.3051	8.15066	6.14154	9.98771	8.84265	18.9153	8.13463	10.0643	0.808264	0.450014
sp|P39059|COFA1_HUMAN	COL15A1	Collagen alpha-1(XV) chain OS=Homo sapiens OX=9606 GN=COL15A1 PE=1 SV=2	60	2	11.0976	11.5556	9.19	8.77703	8.90081	9.3071	8.39866	11.0918	10.0849	9.37268	1.07599	0.450525
sp|Q5ZPR3|CD276_HUMAN	CD276	CD276 antigen OS=Homo sapiens OX=9606 GN=CD276 PE=1 SV=1	255	3	8.58028	9.33847	10.9412	13.2937	9.74852	10.8087	10.3704	6.7806	10.3902	9.27778	1.1199	0.452662
sp|P33151|CADH5_HUMAN	CDH5	Cadherin-5 OS=Homo sapiens OX=9606 GN=CDH5 PE=1 SV=5	653	2	10.5422	10.9965	7.65409	8.36981	12.7362	10.2436	6.87349	13.1071	9.28322	10.4122	0.891568	0.453019
sp|Q8NHP8|PLBL2_HUMAN	PLBD2	Putative phospholipase B-like 2 OS=Homo sapiens OX=9606 GN=PLBD2 PE=1 SV=2	373	3	10.2036	8.93762	8.70098	10.1781	11.6741	9.29294	9.44509	9.7957	9.47987	10.0093	0.947105	0.454873
sp|O00754|MA2B1_HUMAN	MAN2B1	Lysosomal alpha-mannosidase OS=Homo sapiens OX=9606 GN=MAN2B1 PE=1 SV=3	521	1	9.82712	12.6371	10.066	11.3858	12.075	8.21029	10.5306	9.79947	10.9225	10.0572	1.08605	0.456209
sp|Q08431|MFGM_HUMAN	MFGE8	Lactadherin OS=Homo sapiens OX=9606 GN=MFGE8 PE=1 SV=3	76	4	10.5111	9.39563	9.62952	7.64527	12.3447	9.39594	11.4812	7.79873	9.23406	10.095	0.914713	0.457384
sp|P14314|GLU2B_HUMAN	PRKCSH	Glucosidase 2 subunit beta OS=Homo sapiens OX=9606 GN=PRKCSH PE=1 SV=2	137	1	7.60261	5.39269	11.7243	11.4863	9.04112	9.07741	10.6868	13.2483	8.62003	10.3824	0.830254	0.460454
sp|O75144|ICOSL_HUMAN	ICOSLG	ICOS ligand OS=Homo sapiens OX=9606 GN=ICOSLG PE=1 SV=2	414	1	10.2944	11.9375	7.96158	10.4165	8.59297	5.8055	6.38292	13.5517	10.0475	8.10493	1.23968	0.462231
sp|P47929|LEG7_HUMAN_contaminant	LGALS7	Galectin-7 OS=Homo sapiens GN=LGALS7 PE=1 SV=2	424	2	7.79865	9.66749	8.31041	6.6754	5.79551	24.4461	11.0167	5.96921	8.04189	9.82466	0.818542	0.46315
sp|O95445|APOM_HUMAN	APOM	Apolipoprotein M OS=Homo sapiens OX=9606 GN=APOM PE=1 SV=2	59	2	8.7263	9.35151	12.1023	13.5331	9.20714	9.68817	13.3606	4.94217	10.7521	8.76047	1.22735	0.464576
sp|Q15493|RGN_HUMAN	RGN	Regucalcin OS=Homo sapiens OX=9606 GN=RGN PE=1 SV=1	491	7	8.08654	8.13591	6.9254	8.47602	6.30237	15.1697	4.89391	14.0804	7.88318	9.00924	0.875011	0.464923
sp|P52758|RIDA_HUMAN	RIDA	2-iminobutanoate/2-iminopropanoate deaminase OS=Homo sapiens OX=9606 GN=RIDA PE=1 SV=1	30	1	8.16295	8.30113	8.58459	9.5042	7.0143	16.898	8.14854	9.90842	8.62293	9.89068	0.871824	0.466018
sp|Q8IUL8|CILP2_HUMAN	CILP2	Cartilage intermediate layer protein 2 OS=Homo sapiens OX=9606 GN=CILP2 PE=2 SV=2	625	1	11.3145	14.0683	7.61152	8.71758	10.8139	7.25734	7.01865	10.978	10.1376	8.81829	1.14961	0.466051
sp|O43505|B4GA1_HUMAN	B4GAT1	Beta-1,4-glucuronyltransferase 1 OS=Homo sapiens OX=9606 GN=B4GAT1 PE=1 SV=1	319	3	10.0913	9.30595	9.42437	10.8609	12.7588	12.3229	10.8167	7.68092	9.90163	10.6907	0.926187	0.468702
sp|P29508|SPB3_HUMAN_contaminant	SERPINB3	Serpin B3 OS=Homo sapiens GN=SERPINB3 PE=1 SV=2	388	2	8.58343	8.96146	8.14331	9.46827	8.108	8.76034	8.66564	15.2326	8.77562	9.84016	0.891816	0.469251
sp|P61981|1433G_HUMAN	YWHAG	14-3-3 protein gamma OS=Homo sapiens OX=9606 GN=YWHAG PE=1 SV=2	260	1	8.9664	7.2587	10.7008	9.88319	6.34314	11.5793	9.47005	17.0446	9.10852	10.4347	0.872903	0.470283
sp|Q96PD5|PGRP2_HUMAN	PGLYRP2	N-acetylmuramoyl-L-alanine amidase OS=Homo sapiens OX=9606 GN=PGLYRP2 PE=1 SV=1	75	2	8.58852	9.54063	10.8823	14.0009	10.1548	8.48945	9.42945	10.8787	10.5704	9.69736	1.09003	0.473291
sp|P02760|AMBP_HUMAN	AMBP	Protein AMBP OS=Homo sapiens OX=9606 GN=AMBP PE=1 SV=1	292	4	9.74267	6.4966	14.7498	14.9403	8.41704	13.6088	11.3641	3.29043	10.8674	8.08987	1.34334	0.47451
sp|P04424|ARLY_HUMAN	ASL	Argininosuccinate lyase OS=Homo sapiens OX=9606 GN=ASL PE=1 SV=4	580	1	7.09774	9.60374	8.95142	10.6017	7.96905	12.0137	8.85247	11.0653	8.96824	9.84074	0.911337	0.476437
sp|Q14517|FAT1_HUMAN	FAT1	Protocadherin Fat 1 OS=Homo sapiens OX=9606 GN=FAT1 PE=1 SV=2	529	2	10.949	10.6656	10.3962	12.4517	12.4554	11.1235	10.6083	4.36506	11.0883	8.94971	1.23896	0.478404
sp|Q9NPH2|INO1_HUMAN	ISYNA1	Inositol-3-phosphate synthase 1 OS=Homo sapiens OX=9606 GN=ISYNA1 PE=1 SV=1	690	1	7.23795	11.2936	10.9067	11.8309	8.51762	11.7353	9.14264	7.79675	10.1342	9.18754	1.10304	0.480173
sp|Q99497|PARK7_HUMAN	PARK7	Protein/nucleic acid deglycase DJ-1 OS=Homo sapiens OX=9606 GN=PARK7 PE=1 SV=2	120	7	9.45239	8.22685	9.24512	9.17214	6.87579	13.4837	7.14999	15.7319	9.01134	10.1054	0.891733	0.485013
sp|P49189|AL9A1_HUMAN	ALDH9A1	4-trimethylaminobutyraldehyde dehydrogenase OS=Homo sapiens OX=9606 GN=ALDH9A1 PE=1 SV=3	126	4	8.88301	9.84782	9.37707	10.3683	8.22166	11.7196	7.1842	8.12609	9.60326	8.6603	1.10888	0.488381
tr|J3KN67|J3KN67_HUMAN	TPM3	Tropomyosin alpha-3 chain OS=Homo sapiens OX=9606 GN=TPM3 PE=1 SV=1	157	2	8.15122	8.45358	8.66254	9.82232	6.5293	9.62271	7.85277	23.1506	8.75046	10.338	0.846435	0.49032
sp|Q9Y240|CLC11_HUMAN	CLEC11A	C-type lectin domain family 11 member A OS=Homo sapiens OX=9606 GN=CLEC11A PE=1 SV=1	229	2	9.07337	9.64486	10.4519	12.2449	8.1918	10.64	8.88484	10.9043	10.2874	9.5861	1.07315	0.493048
sp|Q9UHI8|ATS1_HUMAN	ADAMTS1	A disintegrin and metalloproteinase with thrombospondin motifs 1 OS=Homo sapiens OX=9606 GN=ADAMTS1 PE=1 SV=4	528	1	5.91402	8.15907	6.56061	6.56667	6.57181	5.93654	7.38745	11.0024	6.75232	7.50413	0.899815	0.493435
sp|P58546|MTPN_HUMAN	MTPN	Myotrophin OS=Homo sapiens OX=9606 GN=MTPN PE=1 SV=2	417	1	8.13354	11.0028	10.3984	10.7741	8.51677	11.3697	9.63172	7.81996	10.0065	9.2413	1.0828	0.493494
sp|Q76LX8|ATS13_HUMAN	ADAMTS13	A disintegrin and metalloproteinase with thrombospondin motifs 13 OS=Homo sapiens OX=9606 GN=ADAMTS13 PE=1 SV=1	354	3	8.26383	12.5528	9.18038	11.5967	11.4523	7.80667	9.5828	9.07578	10.2513	9.39039	1.09168	0.494497
sp|P12107|COBA1_HUMAN	COL11A1	Collagen alpha-1(XI) chain OS=Homo sapiens OX=9606 GN=COL11A1 PE=1 SV=4	109	11	9.14461	9.48025	10.0884	11.5437	10.7758	10.9178	10.1624	10.1024	10.0239	10.4834	0.956173	0.497899
sp|Q96C19|EFHD2_HUMAN	EFHD2	EF-hand domain-containing protein D2 OS=Homo sapiens OX=9606 GN=EFHD2 PE=1 SV=1	525	1	9.05113	8.80539	9.39522	9.67262	7.51819	13.7862	7.26698	14.0919	9.2252	10.1501	0.908877	0.504278
sp|P07737|PROF1_HUMAN	PFN1	Profilin-1 OS=Homo sapiens OX=9606 GN=PFN1 PE=1 SV=2	269	9	11.1315	9.31513	11.3249	11.7184	8.38287	14.1118	8.50168	7.89112	10.8308	9.43854	1.14751	0.504743
sp|P62280|RS11_HUMAN	RPS11	40S ribosomal protein S11 OS=Homo sapiens OX=9606 GN=RPS11 PE=1 SV=3	500	1	13.782	7.7315	10.6287	9.37463	7.6639	12.0057	6.29328	10.4096	10.1509	8.81124	1.15203	0.506345
sp|P55786|PSA_HUMAN	NPEPPS	Puromycin-sensitive aminopeptidase OS=Homo sapiens OX=9606 GN=NPEPPS PE=1 SV=2	72	1	13.2233	8.96603	13.4394	13.1365	10.3384	18.1488	8.35482	1.18398	12.0282	6.56365	1.83254	0.507438
sp|Q86VP6|CAND1_HUMAN	CAND1	Cullin-associated NEDD8-dissociated protein 1 OS=Homo sapiens OX=9606 GN=CAND1 PE=1 SV=2	117	2	8.92743	8.84447	10.3636	10.1241	7.56945	12.0011	7.46905	7.80543	9.54039	8.53074	1.11835	0.507697
sp|Q14520|HABP2_HUMAN	HABP2	Hyaluronan-binding protein 2 OS=Homo sapiens OX=9606 GN=HABP2 PE=1 SV=1	383	5	10.1193	12.9721	7.63176	8.61976	11.6799	7.08086	7.73833	8.48592	9.63985	8.58456	1.12293	0.508105
sp|O43707|ACTN4_HUMAN	ACTN4	Alpha-actinin-4 OS=Homo sapiens OX=9606 GN=ACTN4 PE=1 SV=2	81	12	11.7876	9.5311	11.1059	11.3355	8.53548	13.5668	9.43395	8.42153	10.9054	9.79372	1.11351	0.508409
sp|Q6V0I7|FAT4_HUMAN	FAT4	Protocadherin Fat 4 OS=Homo sapiens OX=9606 GN=FAT4 PE=1 SV=2	321	1	7.5234	6.42924	14.1268	13.2621	8.61599	10.6368	11.0195	3.90524	9.7568	7.92467	1.23119	0.509875
sp|P54802|ANAG_HUMAN	NAGLU	Alpha-N-acetylglucosaminidase OS=Homo sapiens OX=9606 GN=NAGLU PE=1 SV=2	228	2	8.79988	8.62098	10.2214	10.661	9.20101	9.32295	8.50339	9.66698	9.53532	9.16364	1.04056	0.512792
sp|P14625|ENPL_HUMAN	HSP90B1	Endoplasmin OS=Homo sapiens OX=9606 GN=HSP90B1 PE=1 SV=1	39	10	10.5616	9.42108	10.5989	10.2454	8.81506	12.2453	9.01427	7.91705	10.1954	9.36855	1.08826	0.516932
sp|P01857|IGHG1_HUMAN	IGHG1	Immunoglobulin heavy constant gamma 1 OS=Homo sapiens OX=9606 GN=IGHG1 PE=1 SV=1	630	1	9.28791	9.39251	16.9004	5.96416	4.54778	19.119	22.3807	8.88577	9.68359	11.4672	0.844458	0.518346
sp|Q99436|PSB7_HUMAN	PSMB7	Proteasome subunit beta type-7 OS=Homo sapiens OX=9606 GN=PSMB7 PE=1 SV=1	517	1	11.7352	8.84857	13.0312	11.2922	5.4118	13.9839	11.6418	8.00521	11.1181	9.16412	1.21322	0.520278
sp|P49747|COMP_HUMAN	COMP	Cartilage oligomeric matrix protein OS=Homo sapiens OX=9606 GN=COMP PE=1 SV=2	80	14	8.655	9.49587	10.0138	10.5618	10.0479	8.82384	8.90866	15.717	9.65572	10.5555	0.914757	0.52553
sp|Q92520|FAM3C_HUMAN	FAM3C	Protein FAM3C OS=Homo sapiens OX=9606 GN=FAM3C PE=1 SV=1	94	4	7.30588	8.39711	11.203	11.7283	9.2282	10.4025	10.7574	11.4901	9.4753	10.4369	0.907865	0.525781
tr|C9JV77|C9JV77_HUMAN	AHSG	Alpha-2-HS-glycoprotein OS=Homo sapiens OX=9606 GN=AHSG PE=1 SV=1	105	5	6.53085	7.54184	10.9972	8.43321	7.30373	7.42764	12.6672	10.4519	8.22111	9.20593	0.893023	0.526333
sp|P05109|S10A8_HUMAN_contaminant	S100A8	Protein S100-A8 OS=Homo sapiens GN=S100A8 PE=1 SV=1	112	5	16.8573	9.51309	16.2439	7.82921	5.31496	20.2505	9.47845	3.36065	11.9503	7.65198	1.56173	0.526362
sp|P61978|HNRPK_HUMAN	HNRNPK	Heterogeneous nuclear ribonucleoprotein K OS=Homo sapiens OX=9606 GN=HNRNPK PE=1 SV=1	594	1	8.0305	6.12959	16.0949	12.5753	7.43277	15.1875	9.8799	0	9.99068	#NUM!	#NUM!	0.532324
sp|O00469|PLOD2_HUMAN	PLOD2	Procollagen-lysine,2-oxoglutarate 5-dioxygenase 2 OS=Homo sapiens OX=9606 GN=PLOD2 PE=1 SV=2	648	1	13.8494	16.0148	6.60025	7.34727	14.4324	8.36398	6.83874	6.30407	10.1838	8.49351	1.19901	0.536956
sp|P15586|GNS_HUMAN	GNS	N-acetylglucosamine-6-sulfatase OS=Homo sapiens OX=9606 GN=GNS PE=1 SV=3	149	1	10.928	5.68919	14.4797	9.62672	10.4601	19.4858	11.3539	7.60739	9.64844	11.5188	0.837623	0.539847
sp|Q93063|EXT2_HUMAN	EXT2	Exostosin-2 OS=Homo sapiens OX=9606 GN=EXT2 PE=1 SV=1	543	2	10.524	9.38021	10.1276	12.8099	11.097	11.1023	10.4276	7.16339	10.638	9.79446	1.08613	0.548677
sp|P52565|GDIR1_HUMAN	ARHGDIA	Rho GDP-dissociation inhibitor 1 OS=Homo sapiens OX=9606 GN=ARHGDIA PE=1 SV=3	46	5	11.5689	12.9073	5.66441	7.07787	11.073	8.04718	6.65519	20.7368	8.79622	10.5306	0.835302	0.551118
sp|P50395|GDIB_HUMAN	GDI2	Rab GDP dissociation inhibitor beta OS=Homo sapiens OX=9606 GN=GDI2 PE=1 SV=2	570	1	9.2074	9.8261	9.94074	12.716	8.61464	12.6518	8.34739	18.7369	10.3412	11.4264	0.905029	0.552635
sp|Q9UKU9|ANGL2_HUMAN	ANGPTL2	Angiopoietin-related protein 2 OS=Homo sapiens OX=9606 GN=ANGPTL2 PE=1 SV=1	445	2	9.58412	8.27376	8.79002	10.3914	11.3666	11.4193	12.5402	5.81053	9.22528	9.8616	0.935475	0.557392
sp|O60763|USO1_HUMAN	USO1	General vesicular transport factor p115 OS=Homo sapiens OX=9606 GN=USO1 PE=1 SV=2	502	1	8.40681	8.94044	11.5652	13.4426	8.73634	12.3462	7.02126	10.2184	10.397	9.37919	1.10851	0.559058
sp|P25789|PSA4_HUMAN	PSMA4	Proteasome subunit alpha type-4 OS=Homo sapiens OX=9606 GN=PSMA4 PE=1 SV=1	456	4	10.272	9.27608	10.1315	9.58471	8.4203	10.1695	10.718	8.31164	9.80772	9.34559	1.04945	0.564574
sp|P48723|HSP13_HUMAN	HSPA13	Heat shock 70 kDa protein 13 OS=Homo sapiens OX=9606 GN=HSPA13 PE=1 SV=1	522	1	7.62341	8.55873	9.94415	12.3453	8.5503	11.145	10.904	2.06468	9.46035	6.80573	1.39005	0.567995
sp|Q9HBI1|PARVB_HUMAN	PARVB	Beta-parvin OS=Homo sapiens OX=9606 GN=PARVB PE=1 SV=1	142	2	8.48879	10.6887	10.4748	11.9533	9.45945	11.6197	11.075	5.84747	10.3241	9.1853	1.12398	0.572394
sp|Q53FT3|HIKES_HUMAN	HIKESHI	Protein Hikeshi OS=Homo sapiens OX=9606 GN=HIKESHI PE=1 SV=2	516	1	10.7043	10.57	10.8882	12.7046	6.28922	19.9676	8.06796	0	11.185	#NUM!	#NUM!	0.573793
sp|Q86Y46|K2C73_HUMAN_contaminant	KRT73	Keratin, type II cytoskeletal 73 OS=Homo sapiens GN=KRT73 PE=1 SV=1	316	2	15.7615	9.37427	12.6932	7.93122	6.20015	9.50813	14.653	9.55706	11.0436	9.53207	1.15858	0.576269
sp|P09417|DHPR_HUMAN	QDPR	Dihydropteridine reductase OS=Homo sapiens OX=9606 GN=QDPR PE=1 SV=2	15	1	7.90083	6.18865	11.0871	12.8072	5.62835	17.1125	9.48153	12.5789	9.1282	10.3527	0.881721	0.576589
sp|Q12884|SEPR_HUMAN	FAP	Prolyl endopeptidase FAP OS=Homo sapiens OX=9606 GN=FAP PE=1 SV=5	272	3	11.514	11.4289	9.30951	9.49925	11.9113	11.2475	9.94412	4.07618	10.3863	8.58438	1.20991	0.579645
sp|P22061|PIMT_HUMAN	PCMT1	Protein-L-isoaspartate(D-aspartate) O-methyltransferase OS=Homo sapiens OX=9606 GN=PCMT1 PE=1 SV=4	532	1	11.2314	7.39919	14.8425	12.5326	6.14537	18.8264	9.68165	1.98392	11.1504	6.8659	1.62403	0.580714
sp|P55290|CAD13_HUMAN	CDH13	Cadherin-13 OS=Homo sapiens OX=9606 GN=CDH13 PE=1 SV=1	395	3	7.28081	10.4731	7.90208	9.86267	8.48873	7.83127	9.11137	13.7217	8.78006	9.54809	0.919562	0.582051
sp|P04004|VTNC_HUMAN	VTN	Vitronectin OS=Homo sapiens OX=9606 GN=VTN PE=1 SV=1	277	4	5.41313	10.0063	4.64501	6.22893	6.50884	4.2376	6.30965	6.16342	6.29188	5.72285	1.09943	0.585447
sp|Q9Y376|CAB39_HUMAN	CAB39	Calcium-binding protein 39 OS=Homo sapiens OX=9606 GN=CAB39 PE=1 SV=1	539	3	9.34718	9.13905	10.3959	12.5874	10.1127	14.0826	7.75658	4.32246	10.2824	8.31262	1.23696	0.587312
sp|P01011|AACT_HUMAN	SERPINA3	Alpha-1-antichymotrypsin OS=Homo sapiens OX=9606 GN=SERPINA3 PE=1 SV=2	40	6	14.72	7.02353	12.1228	6.23699	13.15	23.7476	7.0153	6.62094	9.40287	10.9743	0.856806	0.589029
sp|Q6UX71|PXDC2_HUMAN	PLXDC2	Plexin domain-containing protein 2 OS=Homo sapiens OX=9606 GN=PLXDC2 PE=1 SV=1	257	2	5.06233	5.66063	6.45504	8.66755	6.2253	6.09394	5.9114	10.9111	6.3278	7.03322	0.899701	0.592334
sp|P55259|GP2_HUMAN	GP2	Pancreatic secretory granule membrane major glycoprotein GP2 OS=Homo sapiens OX=9606 GN=GP2 PE=2 SV=3	659	1	8.60257	12.4023	10.4593	11.9748	11.7159	7.79376	10.1586	11.0358	10.7517	10.0587	1.0689	0.593484
sp|P02774|VTDB_HUMAN	GC	Vitamin D-binding protein OS=Homo sapiens OX=9606 GN=GC PE=1 SV=2	422	28	9.85678	10.2762	6.18087	7.28405	10.1418	6.69359	6.18549	16.5769	8.21765	9.13404	0.899673	0.593605
sp|Q14314|FGL2_HUMAN	FGL2	Fibroleukin OS=Homo sapiens OX=9606 GN=FGL2 PE=1 SV=1	310	2	7.07082	7.99814	10.3586	11.1868	6.7399	9.6248	6.45929	23.5598	8.99739	9.96782	0.902643	0.594954
sp|P11279|LAMP1_HUMAN	LAMP1	Lysosome-associated membrane glycoprotein 1 OS=Homo sapiens OX=9606 GN=LAMP1 PE=1 SV=3	676	1	9.50121	7.40968	13.8997	9.78214	6.14294	11.9481	9.33362	9.12257	9.89132	8.8912	1.11248	0.595601
sp|Q6EMK4|VASN_HUMAN	VASN	Vasorin OS=Homo sapiens OX=9606 GN=VASN PE=1 SV=1	326	3	7.9339	8.55297	13.589	14.8581	9.6018	13.2146	11.7405	4.6807	10.819	9.138	1.18396	0.597725
sp|P23468|PTPRD_HUMAN	PTPRD	Receptor-type tyrosine-protein phosphatase delta OS=Homo sapiens OX=9606 GN=PTPRD PE=1 SV=2	420	2	7.97823	9.44815	8.37189	9.38672	9.11067	8.27578	8.01669	12.0812	8.77299	9.24413	0.949034	0.597871
sp|P09211|GSTP1_HUMAN	GSTP1	Glutathione S-transferase P OS=Homo sapiens OX=9606 GN=GSTP1 PE=1 SV=2	145	6	12.192	8.40286	9.91436	9.52996	8.66805	16.9114	9.363	9.84167	9.91892	10.7807	0.920064	0.598705
sp|P14174|MIF_HUMAN	MIF	Macrophage migration inhibitory factor OS=Homo sapiens OX=9606 GN=MIF PE=1 SV=4	536	1	12.7792	7.82604	8.27065	7.89982	8.89621	12.2205	7.07206	12.5477	8.99085	9.91062	0.907193	0.599767
sp|Q7Z7G0|TARSH_HUMAN	ABI3BP	Target of Nesh-SH3 OS=Homo sapiens OX=9606 GN=ABI3BP PE=1 SV=1	504	1	9.13953	10.3299	9.79442	11.2073	10.8886	9.0789	8.18288	10.5947	10.0896	9.62166	1.04864	0.600003
sp|O75882|ATRN_HUMAN	ATRN	Attractin OS=Homo sapiens OX=9606 GN=ATRN PE=1 SV=2	484	1	12.6703	10.2519	10.9273	9.50908	12.6697	12.1023	11.4601	0	10.7786	#NUM!	#NUM!	0.602799
sp|P49327|FAS_HUMAN	FASN	Fatty acid synthase OS=Homo sapiens OX=9606 GN=FASN PE=1 SV=3	610	1	14.5979	6.03718	11.3235	10.147	8.62056	15.4039	8.24591	3.02905	10.0314	7.58888	1.32185	0.604328
sp|Q5VTE0|EF1A3_HUMAN	EEF1A1P5	Putative elongation factor 1-alpha-like 3 OS=Homo sapiens OX=9606 GN=EEF1A1P5 PE=5 SV=1	238	12	9.93842	8.74753	10.2444	9.48018	6.66667	10.8271	6.87147	11.1884	9.58576	8.63097	1.11062	0.60836
sp|P23471|PTPRZ_HUMAN	PTPRZ1	Receptor-type tyrosine-protein phosphatase zeta OS=Homo sapiens OX=9606 GN=PTPRZ1 PE=1 SV=4	513	2	9.37773	9.54923	9.93022	11.0767	10.4918	13.686	12.5115	6.76518	9.96228	10.4997	0.948812	0.608901
sp|P10619|PPGB_HUMAN	CTSA	Lysosomal protective protein OS=Homo sapiens OX=9606 GN=CTSA PE=1 SV=2	299	2	13.1255	10.4733	13.827	9.20982	11.6817	14.9586	10.1585	4.46464	11.5026	9.43525	1.21911	0.609996
sp|Q9NZJ4|SACS_HUMAN	SACS	Sacsin OS=Homo sapiens OX=9606 GN=SACS PE=1 SV=2	664	2	10.5166	11.7015	10.7469	9.86548	13.3122	10.4987	10.4391	4.12242	10.6876	8.80644	1.21361	0.610191
sp|P49773|HINT1_HUMAN	HINT1	Histidine triad nucleotide-binding protein 1 OS=Homo sapiens OX=9606 GN=HINT1 PE=1 SV=2	139	1	7.88743	7.52469	7.99554	9.15815	5.71667	7.43783	6.8412	20.3226	8.11932	8.7685	0.925965	0.612859
sp|P12814|ACTN1_HUMAN	ACTN1	Alpha-actinin-1 OS=Homo sapiens OX=9606 GN=ACTN1 PE=1 SV=2	81	6	10.5124	9.02041	11.1522	10.9052	9.16344	12.1465	10.0801	8.05973	10.3629	9.75155	1.06269	0.61329
sp|P05997|CO5A2_HUMAN	COL5A2	Collagen alpha-2(V) chain OS=Homo sapiens OX=9606 GN=COL5A2 PE=1 SV=3	611	1	7.70067	10.0826	11.5672	11.5378	10.5642	10.6126	7.95516	9.39173	10.0893	9.56672	1.05463	0.613851
sp|P00747|PLMN_HUMAN	PLG	Plasminogen OS=Homo sapiens OX=9606 GN=PLG PE=1 SV=2	63	19	13.5058	14.6131	8.23168	9.23457	16.0753	8.86374	7.03315	8.12515	11.0673	9.49925	1.16507	0.615533
sp|P22105|TENX_HUMAN	TNXB	Tenascin-X OS=Homo sapiens OX=9606 GN=TNXB PE=1 SV=5	253	1	9.27146	9.83174	11.1863	12.2714	9.63387	10.7379	11.3262	9.07335	10.5764	10.1541	1.04159	0.618139
sp|P62805|H4_HUMAN	H4C1	Histone H4 OS=Homo sapiens OX=9606 GN=H4C1 PE=1 SV=2	650	1	10.1476	8.44076	14.2965	9.19954	9.02762	14.3641	7.93233	6.14994	10.3023	8.91827	1.15519	0.620335
sp|P02788|TRFL_HUMAN	LTF	Lactotransferrin OS=Homo sapiens OX=9606 GN=LTF PE=1 SV=6	200	29	9.01429	12.3664	5.58253	5.42108	10.66	3.89786	5.2488	21.9763	7.62119	8.3205	0.915953	0.624283
sp|Q13740|CD166_HUMAN	ALCAM	CD166 antigen OS=Homo sapiens OX=9606 GN=ALCAM PE=1 SV=2	583	2	8.89281	9.18518	12.648	12.2217	9.26553	12.4523	11.5612	6.08975	10.6003	9.49359	1.11658	0.625383
sp|P07237|PDIA1_HUMAN	P4HB	Protein disulfide-isomerase OS=Homo sapiens OX=9606 GN=P4HB PE=1 SV=3	466	5	11.1073	9.86377	7.97365	7.26474	8.87693	8.9851	7.40901	14.8197	8.92549	9.67378	0.922648	0.6259
sp|P04080|CYTB_HUMAN	CSTB	Cystatin-B OS=Homo sapiens OX=9606 GN=CSTB PE=1 SV=2	652	1	10.7654	9.29334	9.60394	9.23132	5.63075	16.6797	10.3736	11.1446	9.70463	10.2079	0.950696	0.62609
sp|P13693|TCTP_HUMAN	TPT1	Translationally-controlled tumor protein OS=Homo sapiens OX=9606 GN=TPT1 PE=1 SV=1	658	1	12.4247	8.53887	10.6692	12.8617	8.70805	16.5446	6.72687	7.3154	10.9845	9.17608	1.19708	0.627575
sp|P28300|LYOX_HUMAN	LOX	Protein-lysine 6-oxidase OS=Homo sapiens OX=9606 GN=LOX PE=1 SV=2	627	1	7.32336	9.17091	8.99078	8.72123	4.51103	6.62838	6.51969	28.9581	8.51872	8.66802	0.982776	0.629641
sp|P06396|GELS_HUMAN	GSN	Gelsolin OS=Homo sapiens OX=9606 GN=GSN PE=1 SV=1	67	44	9.69423	9.38719	10.1542	10.516	9.65526	13.8791	9.10209	9.53785	9.92856	10.3855	0.955998	0.630558
sp|P31150|GDIA_HUMAN	GDI1	Rab GDP dissociation inhibitor alpha OS=Homo sapiens OX=9606 GN=GDI1 PE=1 SV=2	570	2	6.02034	8.8242	6.53959	7.05259	7.4843	6.46883	5.29491	12.836	7.03556	7.57384	0.928929	0.635786
sp|Q9NY97|B3GN2_HUMAN	B3GNT2	N-acetyllactosaminide beta-1,3-N-acetylglucosaminyltransferase 2 OS=Homo sapiens OX=9606 GN=B3GNT2 PE=1 SV=2	510	1	11.2706	10.0849	10.6769	10.4193	12.9025	12.671	12.1152	7.47553	10.6041	11.031	0.961305	0.637292
sp|Q86TH1|ATL2_HUMAN	ADAMTSL2	ADAMTS-like protein 2 OS=Homo sapiens OX=9606 GN=ADAMTSL2 PE=1 SV=1	569	1	5.45462	7.90021	16.8296	17.831	4.55514	15.1293	17.8593	0	10.6638	#NUM!	#NUM!	0.638503
sp|P60953|CDC42_HUMAN	CDC42	Cell division control protein 42 homolog OS=Homo sapiens OX=9606 GN=CDC42 PE=1 SV=2	584	2	9.52761	8.47171	10.2515	11.9781	9.31895	10.0438	10.9351	11.7124	9.97775	10.4637	0.953563	0.641281
sp|P08697|A2AP_HUMAN	SERPINF2	Alpha-2-antiplasmin OS=Homo sapiens OX=9606 GN=SERPINF2 PE=1 SV=3	296	9	10.7428	9.25865	10.7335	12.6025	9.82651	13.731	10.5328	5.67497	10.77	9.47659	1.13648	0.644496
sp|Q96D15|RCN3_HUMAN	RCN3	Reticulocalbin-3 OS=Homo sapiens OX=9606 GN=RCN3 PE=1 SV=1	51	7	6.03012	7.50856	9.37744	12.5241	6.34684	8.52199	11.4888	13.0182	8.53942	9.48377	0.900425	0.647866
sp|Q14019|COTL1_HUMAN	COTL1	Coactosin-like protein OS=Homo sapiens OX=9606 GN=COTL1 PE=1 SV=3	301	7	10.6729	7.90861	12.1643	13.1636	8.1751	14.6159	10.6954	6.36446	10.7823	9.49663	1.13538	0.652308
sp|Q99574|NEUS_HUMAN	SERPINI1	Neuroserpin OS=Homo sapiens OX=9606 GN=SERPINI1 PE=1 SV=1	106	1	10.5581	10.4284	8.32541	9.61729	12.723	16.9181	10.7137	3.93281	9.68981	9.75879	0.992932	0.658159
sp|P08670|VIME_HUMAN	VIM	Vimentin OS=Homo sapiens OX=9606 GN=VIM PE=1 SV=4	316	17	13.5607	7.24507	11.4142	9.47204	5.66419	10.638	9.34932	12.433	10.152	9.14826	1.10972	0.6629
sp|P60900|PSA6_HUMAN	PSMA6	Proteasome subunit alpha type-6 OS=Homo sapiens OX=9606 GN=PSMA6 PE=1 SV=1	537	1	9.92377	10.1238	12.1695	11.6071	8.94009	13.2554	12.0162	6.59376	10.9145	9.84371	1.10878	0.663818
sp|P62258|1433E_HUMAN	YWHAE	14-3-3 protein epsilon OS=Homo sapiens OX=9606 GN=YWHAE PE=1 SV=1	260	7	9.26415	7.24759	11.6562	11.9261	5.95437	14.0548	8.51421	7.79605	9.8291	8.63316	1.13853	0.666268
sp|P50502|F10A1_HUMAN	ST13	Hsc70-interacting protein OS=Homo sapiens OX=9606 GN=ST13 PE=1 SV=2	661	1	8.70301	9.14033	8.86442	9.2412	7.10795	13.1107	6.09882	13.2866	8.98468	9.32197	0.963818	0.666283
sp|P48594|SPB4_HUMAN_contaminant	SERPINB4	Serpin B4 OS=Homo sapiens GN=SERPINB4 PE=1 SV=2	262	1	13.3097	9.0044	9.81665	5.19046	6.36718	29.6383	9.14688	3.66549	8.83991	8.9187	0.991167	0.667953
sp|O75339|CILP1_HUMAN	CILP	Cartilage intermediate layer protein 1 OS=Homo sapiens OX=9606 GN=CILP PE=1 SV=4	372	1	8.42817	9.51057	8.14982	8.79417	7.97965	8.07088	7.815	13.828	8.70604	9.13373	0.953174	0.668854
sp|P25786|PSA1_HUMAN	PSMA1	Proteasome subunit alpha type-1 OS=Homo sapiens OX=9606 GN=PSMA1 PE=1 SV=1	333	3	9.09327	8.18017	10.1379	8.59777	6.71859	9.58729	7.90802	15.5358	8.97334	9.43178	0.951394	0.669688
sp|P21333|FLNA_HUMAN	FLNA	Filamin-A OS=Homo sapiens OX=9606 GN=FLNA PE=1 SV=4	49	37	10.8498	10.8522	9.68976	10.2094	8.9635	9.27723	8.14731	13.1118	10.3887	9.7083	1.07009	0.67296
sp|P12763|FETUA_BOVIN_contaminant	AHSG	Alpha-2-HS-glycoprotein OS=Bos taurus GN=AHSG PE=1 SV=2	105	594	8.3668	9.48685	10.0892	10.5427	9.64303	8.6075	9.45712	9.80551	9.58567	9.36656	1.02339	0.67298
sp|Q7LGC8|CHST3_HUMAN	CHST3	Carbohydrate sulfotransferase 3 OS=Homo sapiens OX=9606 GN=CHST3 PE=1 SV=3	345	3	7.56969	9.06164	8.89663	11.7487	7.65965	7.40394	9.14349	10.9607	9.20185	8.68271	1.05979	0.675543
sp|Q86X55|CARM1_HUMAN	CARM1	Histone-arginine methyltransferase CARM1 OS=Homo sapiens OX=9606 GN=CARM1 PE=1 SV=3	498	1	9.60398	8.53403	10.1491	11.0094	9.30559	12.2167	9.31959	5.97884	9.78248	8.92129	1.09653	0.676364
sp|Q9NRN5|OLFL3_HUMAN	OLFML3	Olfactomedin-like protein 3 OS=Homo sapiens OX=9606 GN=OLFML3 PE=2 SV=1	287	3	9.61832	9.32821	11.6579	9.3861	9.94116	9.18866	10.9579	11.1697	9.95407	10.2829	0.968024	0.677231
sp|P13639|EF2_HUMAN	EEF2	Elongation factor 2 OS=Homo sapiens OX=9606 GN=EEF2 PE=1 SV=4	184	9	10.6053	9.43402	10.0231	10.6706	8.3051	13.2801	7.94183	8.92525	10.1707	9.40312	1.08164	0.681665
sp|P55263|ADK_HUMAN	ADK	Adenosine kinase OS=Homo sapiens OX=9606 GN=ADK PE=1 SV=2	496	2	6.47236	7.81041	10.9465	9.51527	4.72784	14.147	10.2072	9.3997	8.5184	8.95029	0.951746	0.686306
sp|P02545|LMNA_HUMAN	LMNA	Prelamin-A/C OS=Homo sapiens OX=9606 GN=LMNA PE=1 SV=1	143	2	8.89757	4.36587	18.2264	10.8961	4.85313	13.5198	9.59144	8.7387	9.37192	8.61154	1.0883	0.69261
sp|P51570|GALK1_HUMAN	GALK1	Galactokinase OS=Homo sapiens OX=9606 GN=GALK1 PE=1 SV=1	607	1	7.35261	11.6934	8.65736	12.2461	8.42151	10.6577	10.7278	7.81813	9.77105	9.31465	1.049	0.695048
sp|P22626|ROA2_HUMAN	HNRNPA2B1	Heterogeneous nuclear ribonucleoproteins A2/B1 OS=Homo sapiens OX=9606 GN=HNRNPA2B1 PE=1 SV=2	461	1	12.4602	6.65743	13.2032	10.0562	8.24463	13.3218	8.1404	9.53839	10.2444	9.60979	1.06604	0.696426
sp|P10451|OSTP_HUMAN	SPP1	Osteopontin OS=Homo sapiens OX=9606 GN=SPP1 PE=1 SV=1	490	1	5.36122	9.98157	8.29404	17.42	10.0855	7.32013	8.1819	10.9223	9.37711	9.01252	1.04045	0.69755
sp|P50914|RL14_HUMAN	RPL14	60S ribosomal protein L14 OS=Homo sapiens OX=9606 GN=RPL14 PE=1 SV=4	644	1	10.4985	8.34905	10.9436	11.5292	10.7394	11.8764	10.7054	9.40451	10.2549	10.6451	0.963341	0.697617
sp|P07900|HS90A_HUMAN	HSP90AA1	Heat shock protein HSP 90-alpha OS=Homo sapiens OX=9606 GN=HSP90AA1 PE=1 SV=5	39	27	9.65831	9.72196	10.1775	10.1724	8.6407	12.9724	8.45598	7.60553	9.92956	9.21437	1.07762	0.699887
sp|Q14697|GANAB_HUMAN	GANAB	Neutral alpha-glucosidase AB OS=Homo sapiens OX=9606 GN=GANAB PE=1 SV=3	56	3	8.04266	6.67639	14.0378	14.0378	6.11944	13.589	12.9876	5.39406	10.1423	8.73647	1.16091	0.701763
sp|Q99972|MYOC_HUMAN	MYOC	Myocilin OS=Homo sapiens OX=9606 GN=MYOC PE=1 SV=2	615	2	7.61275	8.55965	12.8342	12.5239	8.50159	8.98909	9.40694	12.0997	10.1164	9.65739	1.04753	0.702629
sp|P07195|LDHB_HUMAN	LDHB	L-lactate dehydrogenase B chain OS=Homo sapiens OX=9606 GN=LDHB PE=1 SV=2	265	7	14.1832	11.091	6.98418	7.34639	11.5505	9.20175	6.17522	9.45308	9.47837	8.87512	1.06797	0.707321
sp|Q9UBX7|KLK11_HUMAN	KLK11	Kallikrein-11 OS=Homo sapiens OX=9606 GN=KLK11 PE=1 SV=2	684	1	13.3941	9.23536	13.6506	10.2079	11.3179	14.9013	11.4909	5.12013	11.4581	9.98059	1.14804	0.711207
sp|Q13332|PTPRS_HUMAN	PTPRS	Receptor-type tyrosine-protein phosphatase S OS=Homo sapiens OX=9606 GN=PTPRS PE=1 SV=3	264	1	11.2981	15.5917	8.21746	8.62495	14.2721	12.6854	7.17278	13.1553	10.5706	11.4326	0.924599	0.715235
sp|P0CG48|UBC_HUMAN	UBC	Polyubiquitin-C OS=Homo sapiens OX=9606 GN=UBC PE=1 SV=3	329	6	11.3783	9.49505	10.9127	10.3638	9.25128	13.4871	11.2477	9.76085	10.5137	10.8185	0.971826	0.718381
sp|Q14974|IMB1_HUMAN	KPNB1	Importin subunit beta-1 OS=Homo sapiens OX=9606 GN=KPNB1 PE=1 SV=2	624	2	8.11454	8.37358	8.95695	11.5508	6.95483	13.4208	6.64553	13.0991	9.15665	9.49421	0.964446	0.719332
sp|P17405|ASM_HUMAN	SMPD1	Sphingomyelin phosphodiesterase OS=Homo sapiens OX=9606 GN=SMPD1 PE=1 SV=5	118	2	10.3897	9.17595	10.6478	9.24037	12.3955	12.6283	9.62757	6.96303	9.84126	10.1212	0.972344	0.719673
sp|Q9H2M3|BHMT2_HUMAN	BHMT2	S-methylmethionine--homocysteine S-methyltransferase BHMT2 OS=Homo sapiens OX=9606 GN=BHMT2 PE=1 SV=1	86	1	7.49381	10.0108	9.79244	11.2348	7.50018	12.6039	8.34609	12.4194	9.53141	9.94924	0.958003	0.721706
sp|Q05682|CALD1_HUMAN	CALD1	Caldesmon OS=Homo sapiens OX=9606 GN=CALD1 PE=1 SV=3	282	3	11.4897	7.95108	11.4754	10.417	5.45511	9.08869	8.06362	15.3377	10.2226	8.84909	1.15521	0.726565
sp|P15311|EZRI_HUMAN	EZR	Ezrin OS=Homo sapiens OX=9606 GN=EZR PE=1 SV=4	104	6	11.2618	9.89626	10.4776	11.1279	8.63542	13.4813	9.92205	8.97937	10.6767	10.0917	1.05797	0.727106
sp|P10599|THIO_HUMAN	TXN	Thioredoxin OS=Homo sapiens OX=9606 GN=TXN PE=1 SV=3	206	7	8.35071	6.63971	12.0434	10.741	6.23478	15.2565	8.53316	11.014	9.20273	9.72373	0.94642	0.734631
sp|P16278|BGAL_HUMAN	GLB1	Beta-galactosidase OS=Homo sapiens OX=9606 GN=GLB1 PE=1 SV=2	666	1	15.3084	5.8003	14.0948	7.65508	11.9371	19.2172	9.34507	7.32518	9.89344	11.1943	0.883791	0.735084
sp|P18669|PGAM1_HUMAN	PGAM1	Phosphoglycerate mutase 1 OS=Homo sapiens OX=9606 GN=PGAM1 PE=1 SV=2	113	11	9.20606	9.03509	10.3833	11.0805	8.3222	12.1234	10.2201	10.3254	9.89066	10.158	0.973686	0.739965
sp|P62906|RL10A_HUMAN	RPL10A	60S ribosomal protein L10a OS=Homo sapiens OX=9606 GN=RPL10A PE=1 SV=2	164	1	13.9178	9.55303	10.2088	7.16296	7.17126	8.69034	7.87223	14.2009	9.9299	9.13611	1.08688	0.744377
sp|P06744|G6PI_HUMAN	GPI	Glucose-6-phosphate isomerase OS=Homo sapiens OX=9606 GN=GPI PE=1 SV=4	170	6	11.6279	8.80391	11.1893	10.7086	9.5104	13.9146	10.532	5.90646	10.5239	9.52526	1.10484	0.744702
sp|Q9NZT1|CALL5_HUMAN_contaminant	CALML5	Calmodulin-like protein 5 OS=Homo sapiens GN=CALML5 PE=1 SV=2	64	1	11.3673	8.65506	12.8133	6.32044	7.25403	10.221	11.5129	12.6602	9.44787	10.1959	0.926637	0.748723
sp|P67936|TPM4_HUMAN	TPM4	Tropomyosin alpha-4 chain OS=Homo sapiens OX=9606 GN=TPM4 PE=1 SV=3	157	5	8.61246	7.97647	11.1741	10.7979	6.45348	10.0977	9.11619	15.7668	9.54163	9.83769	0.969905	0.751302
sp|O75874|IDHC_HUMAN	IDH1	Isocitrate dehydrogenase [NADP] cytoplasmic OS=Homo sapiens OX=9606 GN=IDH1 PE=1 SV=2	531	3	10.3221	9.86188	9.04508	9.89337	8.74011	13.0561	7.53293	8.03984	9.76947	9.1177	1.07148	0.754738
sp|P62937|PPIA_HUMAN	PPIA	Peptidyl-prolyl cis-trans isomerase A OS=Homo sapiens OX=9606 GN=PPIA PE=1 SV=2	116	13	8.7573	8.59962	6.81707	7.54943	5.88722	6.74494	5.94331	16.7973	7.89024	7.93486	0.994378	0.756344
sp|P60174|TPIS_HUMAN	TPI1	Triosephosphate isomerase OS=Homo sapiens OX=9606 GN=TPI1 PE=1 SV=3	217	10	10.9567	9.11188	10.5846	10.7442	8.95126	12.9891	10.2248	7.60964	10.3225	9.7526	1.05843	0.757332
sp|P16402|H13_HUMAN	H1-3	Histone H1.3 OS=Homo sapiens OX=9606 GN=H1-3 PE=1 SV=2	509	2	9.61783	6.70558	14.6352	7.55615	6.46404	11.4651	9.61373	8.27642	9.18974	8.76303	1.04869	0.757995
tr|Q5TCU3|Q5TCU3_HUMAN	TPM2	Tropomyosin beta chain OS=Homo sapiens OX=9606 GN=TPM2 PE=1 SV=1	157	1	8.19947	8.49508	12.5657	13.1409	6.07877	10.6843	9.61408	13.493	10.356	9.58064	1.08093	0.764349
sp|P35590|TIE1_HUMAN	TIE1	Tyrosine-protein kinase receptor Tie-1 OS=Homo sapiens OX=9606 GN=TIE1 PE=1 SV=1	426	3	12.5645	14.1393	7.74807	8.17148	13.4387	9.27823	9.1306	8.30254	10.2983	9.86014	1.04444	0.764781
sp|P04156|PRIO_HUMAN	PRNP	Major prion protein OS=Homo sapiens OX=9606 GN=PRNP PE=1 SV=1	578	1	9.75325	8.46619	9.785	12.5802	10.8363	13.8514	9.12345	8.61401	10.0409	10.4216	0.963467	0.76514
sp|P09960|LKHA4_HUMAN	LTA4H	Leukotriene A-4 hydrolase OS=Homo sapiens OX=9606 GN=LTA4H PE=1 SV=2	152	1	7.1749	13.5303	7.46132	8.73827	8.00978	8.29773	8.60434	14.6599	8.91951	9.56879	0.932146	0.769204
sp|Q06124|PTN11_HUMAN	PTPN11	Tyrosine-protein phosphatase non-receptor type 11 OS=Homo sapiens OX=9606 GN=PTPN11 PE=1 SV=3	355	1	6.74067	6.42052	11.8094	12.5391	7.89392	10.5175	8.93555	12.4857	8.9473	9.81036	0.912026	0.772945
sp|P15880|RS2_HUMAN	RPS2	40S ribosomal protein S2 OS=Homo sapiens OX=9606 GN=RPS2 PE=1 SV=2	392	1	10.3394	6.5974	13.3589	10.7044	5.99278	12.4702	9.82751	10.3699	9.93803	9.34179	1.06383	0.773056
sp|Q92859|NEO1_HUMAN	NEO1	Neogenin OS=Homo sapiens OX=9606 GN=NEO1 PE=1 SV=2	276	5	8.5164	7.63593	14.6401	12.118	11.2182	10.5254	11.6938	7.15562	10.3639	9.96991	1.03952	0.77505
sp|P13797|PLST_HUMAN	PLS3	Plastin-3 OS=Homo sapiens OX=9606 GN=PLS3 PE=1 SV=4	188	2	8.95385	9.51412	9.20939	10.8811	8.66292	10.6824	7.76356	10.4661	9.61215	9.31204	1.03223	0.77841
sp|Q03692|COAA1_HUMAN	COL10A1	Collagen alpha-1(X) chain OS=Homo sapiens OX=9606 GN=COL10A1 PE=1 SV=2	185	1	11.0625	10.31	11.0301	11.026	13.3334	12.8916	11.807	7.13751	10.8524	10.9707	0.989222	0.780638
sp|P27824|CALX_HUMAN	CANX	Calnexin OS=Homo sapiens OX=9606 GN=CANX PE=1 SV=2	505	2	10.5834	8.66005	10.7872	10.6524	7.81085	11.418	11.6034	8.57198	10.1304	9.70485	1.04385	0.783255
sp|Q96G03|PGM2_HUMAN	PGM2	Phosphoglucomutase-2 OS=Homo sapiens OX=9606 GN=PGM2 PE=1 SV=4	304	2	8.90483	8.67914	11.0246	12.8541	8.87463	16.752	9.91222	2.2664	10.23	7.60206	1.34569	0.785591
sp|P04075|ALDOA_HUMAN	ALDOA	Fructose-bisphosphate aldolase A OS=Homo sapiens OX=9606 GN=ALDOA PE=1 SV=2	100	9	11.1496	9.44617	10.003	10.3164	8.93445	11.7609	8.66836	10.6208	10.2104	9.91746	1.02954	0.78763
sp|Q15942|ZYX_HUMAN	ZYX	Zyxin OS=Homo sapiens OX=9606 GN=ZYX PE=1 SV=1	380	3	7.55915	8.81514	8.92487	8.87179	6.23343	7.01653	6.45688	17.7109	8.52273	8.40966	1.01345	0.791
sp|Q06830|PRDX1_HUMAN	PRDX1	Peroxiredoxin-1 OS=Homo sapiens OX=9606 GN=PRDX1 PE=1 SV=1	33	6	11.9441	8.35177	11.0504	8.64107	8.69283	14.8558	9.17828	9.17598	9.87915	10.2122	0.96739	0.791054
sp|P22392|NDKB_HUMAN	NME2	Nucleoside diphosphate kinase B OS=Homo sapiens OX=9606 GN=NME2 PE=1 SV=1	267	5	13.2449	9.50496	9.90439	9.23568	9.80536	14.3295	8.02732	7.78292	10.3591	9.67948	1.07022	0.795791
sp|P08758|ANXA5_HUMAN	ANXA5	Annexin A5 OS=Homo sapiens OX=9606 GN=ANXA5 PE=1 SV=2	249	1	18.3731	12.5396	5.66211	7.34606	12.3446	10.5304	10.9361	6.77134	9.89406	9.90523	0.998872	0.801266
sp|O95897|NOE2_HUMAN	OLFM2	Noelin-2 OS=Homo sapiens OX=9606 GN=OLFM2 PE=1 SV=2	688	1	9.26781	9.48417	11.4797	11.0229	13.2242	12.628	13.3383	4.4448	10.2695	9.97503	1.02952	0.804938
sp|Q8NBJ7|SUMF2_HUMAN	SUMF2	Inactive C-alpha-formylglycine-generating enzyme 2 OS=Homo sapiens OX=9606 GN=SUMF2 PE=1 SV=2	290	1	13.2795	11.7338	7.85765	6.31106	11.1729	11.5371	9.19705	9.11922	9.3757	10.1969	0.919468	0.805355
sp|P14550|AK1A1_HUMAN	AKR1A1	Aldo-keto reductase family 1 member A1 OS=Homo sapiens OX=9606 GN=AKR1A1 PE=1 SV=3	101	2	8.97067	8.91426	9.42816	9.95865	7.39437	15.1502	6.66781	10.1285	9.3086	9.32636	0.998096	0.806251
sp|P37837|TALDO_HUMAN	TALDO1	Transaldolase OS=Homo sapiens OX=9606 GN=TALDO1 PE=1 SV=2	22	2	9.15736	8.40055	10.0352	11.9396	7.6377	10.8466	9.12337	10.8543	9.79825	9.51707	1.02954	0.813706
sp|P05019|IGF1_HUMAN	IGF1	Insulin-like growth factor I OS=Homo sapiens OX=9606 GN=IGF1 PE=1 SV=1	402	1	10.0242	10.5645	8.994	11.6146	8.48909	10.1308	8.0638	13.2343	10.2557	9.78783	1.0478	0.816262
sp|P11021|BIP_HUMAN	HSPA5	Endoplasmic reticulum chaperone BiP OS=Homo sapiens OX=9606 GN=HSPA5 PE=1 SV=2	133	11	12.4481	10.133	8.74759	8.70096	10.4408	11.1594	9.16308	10.1887	9.89861	10.2125	0.96926	0.823275
sp|P14649|MYL6B_HUMAN	MYL6B	Myosin light chain 6B OS=Homo sapiens OX=9606 GN=MYL6B PE=1 SV=1	107	1	10.0153	8.74314	11.2407	9.59688	5.2418	10.4942	8.58114	13.5571	9.85857	8.94407	1.10225	0.825931
sp|P99999|CYC_HUMAN	CYCS	Cytochrome c OS=Homo sapiens OX=9606 GN=CYCS PE=1 SV=2	566	2	11.8953	7.98205	10.6141	10.4594	5.89274	13.4806	9.27748	14.2279	10.1326	10.1193	1.00131	0.830302
sp|P35858|ALS_HUMAN	IGFALS	Insulin-like growth factor-binding protein complex acid labile subunit OS=Homo sapiens OX=9606 GN=IGFALS PE=1 SV=1	247	4	11.9243	12.1681	8.35995	9.53163	12.1222	17.0683	7.86747	6.9651	10.3695	10.3189	1.0049	0.848026
sp|P22692|IBP4_HUMAN	IGFBP4	Insulin-like growth factor-binding protein 4 OS=Homo sapiens OX=9606 GN=IGFBP4 PE=1 SV=2	623	1	7.92831	13.8997	7.44881	10.6986	6.11293	9.30075	10.5537	12.4269	9.68055	9.29252	1.04176	0.849382
sp|P02656|APOC3_HUMAN	APOC3	Apolipoprotein C-III OS=Homo sapiens OX=9606 GN=APOC3 PE=1 SV=1	214	4	7.14283	9.15047	8.31752	10.7533	7.55199	7.05164	7.96063	14.1301	8.74404	8.79754	0.99392	0.86406
sp|P55287|CAD11_HUMAN	CDH11	Cadherin-11 OS=Homo sapiens OX=9606 GN=CDH11 PE=1 SV=2	270	2	5.36384	5.72159	14.3356	14.4019	5.59031	10.9638	16.5738	3.99228	8.92189	7.98013	1.11801	0.865668
sp|P02662|CASA1_BOVIN_contaminant	CSN1S1	Alpha-S1-casein OS=Bos taurus GN=CSN1S1 PE=1 SV=2	455	1	7.57678	8.29666	7.65655	11.6607	9.2512	6.52266	12.8257	7.77127	8.65539	8.80641	0.98285	0.866363
sp|P26599|PTBP1_HUMAN	PTBP1	Polypyrimidine tract-binding protein 1 OS=Homo sapiens OX=9606 GN=PTBP1 PE=1 SV=1	425	1	9.02976	8.94079	11.2229	11.3082	8.79697	9.40903	9.03511	12.4957	10.0609	9.83203	1.02328	0.866391
sp|P26641|EF1G_HUMAN	EEF1G	Elongation factor 1-gamma OS=Homo sapiens OX=9606 GN=EEF1G PE=1 SV=3	98	3	10.3454	9.42142	9.45561	9.4368	10.718	11.1725	7.50611	9.86637	9.65705	9.70419	0.995143	0.868504
sp|Q06828|FMOD_HUMAN	FMOD	Fibromodulin OS=Homo sapiens OX=9606 GN=FMOD PE=1 SV=2	219	2	15.3982	18.5998	5.26589	6.33324	15.1927	9.78576	6.31117	11.6992	9.88596	10.2358	0.965818	0.87054
sp|P24534|EF1B_HUMAN	EEF1B2	Elongation factor 1-beta OS=Homo sapiens OX=9606 GN=EEF1B2 PE=1 SV=3	150	2	8.90801	8.67591	11.8972	10.4519	6.56319	12.0994	8.38243	14.1791	9.90111	9.85654	1.00452	0.872234
sp|P22102|PUR2_HUMAN	GART	Trifunctional purine biosynthetic protein adenosine-3 OS=Homo sapiens OX=9606 GN=GART PE=1 SV=1	358	1	5.68993	7.50381	8.32399	6.78286	8.27112	7.36481	6.27888	6.84104	7.00702	7.15208	0.979717	0.876751
sp|P01834|IGKC_HUMAN	IGKC	Immunoglobulin kappa constant OS=Homo sapiens OX=9606 GN=IGKC PE=1 SV=2	646	1	6.02143	7.91104	14.7015	15.0629	7.38854	10.5322	13.6372	10.412	10.1345	10.2526	0.988477	0.877242
sp|Q16658|FSCN1_HUMAN	FSCN1	Fascin OS=Homo sapiens OX=9606 GN=FSCN1 PE=1 SV=3	552	2	12.7362	8.38775	8.99344	10.6315	9.80668	15.8441	9.98974	6.51339	10.0531	10.0274	1.00257	0.878587
sp|O75891|AL1L1_HUMAN	ALDH1L1	Cytosolic 10-formyltetrahydrofolate dehydrogenase OS=Homo sapiens OX=9606 GN=ALDH1L1 PE=1 SV=2	617	1	7.06461	10.9179	9.08788	9.40121	6.54986	16.9979	6.99215	7.46127	9.00987	8.72997	1.03206	0.892117
sp|Q00796|DHSO_HUMAN	SORD	Sorbitol dehydrogenase OS=Homo sapiens OX=9606 GN=SORD PE=1 SV=4	641	1	8.28397	7.52395	9.81522	11.9352	5.54066	13.7103	6.28043	10.7961	9.24386	8.47161	1.09116	0.893083
sp|P32754|HPPD_HUMAN	HPD	4-hydroxyphenylpyruvate dioxygenase OS=Homo sapiens OX=9606 GN=HPD PE=1 SV=2	349	3	7.22283	7.38215	9.82641	11.8888	7.55177	16.5833	8.02257	5.63765	8.88394	8.67527	1.02405	0.896697
sp|P21266|GSTM3_HUMAN	GSTM3	Glutathione S-transferase Mu 3 OS=Homo sapiens OX=9606 GN=GSTM3 PE=1 SV=3	492	1	7.20817	11.2905	9.00161	11.7345	9.65672	11.8508	8.24099	8.78245	9.62899	9.53988	1.00934	0.898609
sp|P27797|CALR_HUMAN	CALR	Calreticulin OS=Homo sapiens OX=9606 GN=CALR PE=1 SV=1	385	6	12.5822	6.55841	12.0005	8.72267	8.86708	15.562	9.69543	6.9628	9.64053	9.82425	0.9813	0.900308
sp|P40925|MDHC_HUMAN	MDH1	Malate dehydrogenase, cytoplasmic OS=Homo sapiens OX=9606 GN=MDH1 PE=1 SV=4	557	4	10.7481	10.4429	8.97536	9.36806	10.614	14.5552	8.35221	6.92074	9.85629	9.72104	1.01391	0.902389
sp|Q03167|TGBR3_HUMAN	TGFBR3	Transforming growth factor beta receptor type 3 OS=Homo sapiens OX=9606 GN=TGFBR3 PE=1 SV=3	344	4	8.50277	15.2966	7.05626	8.45784	9.5397	6.95961	6.28926	15.14	9.38636	8.91685	1.05266	0.903444
sp|P19338|NUCL_HUMAN	NCL	Nucleolin OS=Homo sapiens OX=9606 GN=NCL PE=1 SV=3	178	2	8.4136	5.6116	10.1509	9.48167	5.77006	8.48191	6.52074	13.9462	8.2104	8.16783	1.00521	0.904776
sp|P13674|P4HA1_HUMAN	P4HA1	Prolyl 4-hydroxylase subunit alpha-1 OS=Homo sapiens OX=9606 GN=P4HA1 PE=1 SV=2	363	1	7.58211	8.69515	9.99088	12.2806	8.02123	9.95019	9.24217	10.7486	9.48359	9.43625	1.00502	0.904817
sp|P00492|HPRT_HUMAN	HPRT1	Hypoxanthine-guanine phosphoribosyltransferase OS=Homo sapiens OX=9606 GN=HPRT1 PE=1 SV=2	250	1	5.60785	6.67548	9.21894	10.6938	6.05399	7.29169	7.52821	12.2092	7.79423	7.98109	0.976587	0.905167
sp|P07858|CATB_HUMAN	CTSB	Cathepsin B OS=Homo sapiens OX=9606 GN=CTSB PE=1 SV=3	421	3	12.3634	8.51011	10.0282	10.6924	10.4044	9.77351	10.9017	10.096	10.3061	10.2856	1.00199	0.90694
sp|Q9HCL0|PCD18_HUMAN	PCDH18	Protocadherin-18 OS=Homo sapiens OX=9606 GN=PCDH18 PE=2 SV=3	463	1	8.98069	10.5947	9.43709	10.395	9.95739	9.78783	9.61163	9.86213	9.82913	9.80392	1.00257	0.911385
sp|P22314|UBA1_HUMAN	UBA1	Ubiquitin-like modifier-activating enzyme 1 OS=Homo sapiens OX=9606 GN=UBA1 PE=1 SV=3	405	2	8.43882	10.4118	8.76853	8.9219	7.75241	8.9024	8.01744	12.4157	9.10538	9.10411	1.00014	0.912039
sp|Q9UGM3|DMBT1_HUMAN	DMBT1	Deleted in malignant brain tumors 1 protein OS=Homo sapiens OX=9606 GN=DMBT1 PE=1 SV=2	432	1	7.88095	8.02945	7.61964	14.6476	8.24467	7.61528	10.1003	11.3376	9.1673	9.20828	0.995549	0.913146
sp|P53396|ACLY_HUMAN	ACLY	ATP-citrate synthase OS=Homo sapiens OX=9606 GN=ACLY PE=1 SV=3	471	1	8.82174	8.02464	9.60065	10.3996	6.42549	10.6075	9.2464	10.9623	9.16905	9.11693	1.00572	0.935321
sp|Q15365|PCBP1_HUMAN	PCBP1	Poly(rC)-binding protein 1 OS=Homo sapiens OX=9606 GN=PCBP1 PE=1 SV=2	340	1	11.6305	7.11396	13.3406	10.0882	6.93889	14.6901	7.10943	12.6374	10.2725	9.78254	1.05008	0.935966
sp|Q7RTV2|GSTA5_HUMAN	GSTA5	Glutathione S-transferase A5 OS=Homo sapiens OX=9606 GN=GSTA5 PE=1 SV=1	367	4	7.97417	8.23322	7.92219	9.52273	6.23877	9.63795	4.38403	12.7533	8.3891	7.61456	1.10172	0.937679
sp|P09972|ALDOC_HUMAN	ALDOC	Fructose-bisphosphate aldolase C OS=Homo sapiens OX=9606 GN=ALDOC PE=1 SV=2	100	9	10.8527	9.0355	10.1945	10.4635	8.50786	14.6561	8.56214	8.31172	10.1131	9.70573	1.04197	0.941102
sp|Q9BXN1|ASPN_HUMAN	ASPN	Asporin OS=Homo sapiens OX=9606 GN=ASPN PE=1 SV=2	563	1	7.41759	8.5668	8.69561	12.0827	7.41548	8.56106	8.59851	11.7683	9.03933	8.95264	1.00968	0.941655
sp|P06702|S10A9_HUMAN_contaminant	S100A9	Protein S100-A9 OS=Homo sapiens GN=S100A9 PE=1 SV=1	254	6	11.2159	9.93858	11.2462	9.36096	7.41453	18.7029	9.60134	5.13469	10.4081	9.09305	1.14462	0.944414
sp|P07602|SAP_HUMAN	PSAP	Prosaposin OS=Homo sapiens OX=9606 GN=PSAP PE=1 SV=2	506	2	18.4495	21.1219	2.0512	3.42709	20.1339	7.2303	3.4361	15.9754	7.23457	9.45476	0.765178	0.94756
sp|P00533|EGFR_HUMAN	EGFR	Epidermal growth factor receptor OS=Homo sapiens OX=9606 GN=EGFR PE=1 SV=2	512	1	15.1982	20.4901	0.697347	1.60491	19.8741	3.44062	1.8054	14.332	4.32075	6.48561	0.666205	0.957543
sp|O15232|MATN3_HUMAN	MATN3	Matrilin-3 OS=Homo sapiens OX=9606 GN=MATN3 PE=1 SV=2	643	1	8.44212	10.5049	11.7067	10.3143	13.3118	11.8752	10.8257	5.37486	10.1725	9.79321	1.03873	0.95782
sp|P09651|ROA1_HUMAN	HNRNPA1	Heterogeneous nuclear ribonucleoprotein A1 OS=Homo sapiens OX=9606 GN=HNRNPA1 PE=1 SV=5	403	3	11.0182	6.73623	14.1977	8.23674	6.79564	11.5566	10.167	12.0753	9.65218	9.90918	0.974064	0.961891
sp|P09936|UCHL1_HUMAN	UCHL1	Ubiquitin carboxyl-terminal hydrolase isozyme L1 OS=Homo sapiens OX=9606 GN=UCHL1 PE=1 SV=2	567	3	11.7988	11.5123	8.13453	9.2193	8.33743	11.9112	8.15309	11.9903	10.0463	9.92625	1.0121	0.962551
sp|Q92954|PRG4_HUMAN	PRG4	Proteoglycan 4 OS=Homo sapiens OX=9606 GN=PRG4 PE=1 SV=3	266	1	7.33896	12.6927	7.89174	9.17343	9.46458	6.47461	8.2508	12.5711	9.06198	8.92886	1.01491	0.96349
sp|Q86YZ3|HORN_HUMAN_contaminant	HRNR	Hornerin OS=Homo sapiens GN=HRNR PE=1 SV=2	587	1	10.707	8.12076	11.6275	9.65614	4.09067	7.24157	16.0385	12.2177	9.94005	8.72861	1.13879	0.964663
sp|P30101|PDIA3_HUMAN	PDIA3	Protein disulfide-isomerase A3 OS=Homo sapiens OX=9606 GN=PDIA3 PE=1 SV=4	289	9	11.6381	7.50199	12.4678	8.73143	7.83644	13.618	10.488	8.08506	9.87378	9.75331	1.01235	0.966622
sp|P17050|NAGAB_HUMAN	NAGA	Alpha-N-acetylgalactosaminidase OS=Homo sapiens OX=9606 GN=NAGA PE=1 SV=2	674	1	10.3982	11.2961	9.30457	10.8219	10.5484	12.0162	12.4006	6.65597	10.4285	10.1135	1.03114	0.973041
sp|P11142|HSP7C_HUMAN	HSPA8	Heat shock cognate 71 kDa protein OS=Homo sapiens OX=9606 GN=HSPA8 PE=1 SV=1	133	12	10.7433	9.93349	8.65292	9.31299	8.52436	9.85275	7.17131	13.2378	9.62992	9.44949	1.01909	0.980535
sp|P02748|CO9_HUMAN	C9	Complement component C9 OS=Homo sapiens OX=9606 GN=C9 PE=1 SV=2	88	1	7.28388	16.0508	1.78063	5.26214	9.32413	2.76834	7.05061	10.9255	5.75306	6.67765	0.861539	0.983366
sp|P06681|CO2_HUMAN	C2	Complement C2 OS=Homo sapiens OX=9606 GN=C2 PE=1 SV=2	169	4	8.7536	10.3516	10.8911	11.4035	10.0075	9.35742	14.4036	7.76684	10.2997	10.1169	1.01807	0.983419
sp|P07225|PROS_HUMAN	PROS1	Vitamin K-dependent protein S OS=Homo sapiens OX=9606 GN=PROS1 PE=1 SV=1	146	7	10.6431	11.2178	8.83598	9.88534	11.2368	9.9638	8.40085	11.0295	10.1054	10.0922	1.00131	0.988763
sp|P61970|NTF2_HUMAN	NUTF2	Nuclear transport factor 2 OS=Homo sapiens OX=9606 GN=NUTF2 PE=1 SV=1	32	2	7.61693	9.73632	9.65509	11.0955	7.42141	10.226	7.24664	13.2335	9.44103	9.23636	1.02216	0.997172
